# Supplementary material for: Comprehensive characterization of the tumor microenvironment for assessing immunotherapy outcome in patients with head and neck squamous cell carcinoma
Source: Aging (Albany NY). 2020 Nov 18;12(22):22509–26. doi: 10.18632/aging.103460 (PMC7746351; doi:10.18632/aging.103460)
Supplement: Supplementary Table 1 [file aging-12-103460-s002..xlsx]

## Sheet: LM22_sur
log_rank_p	risk	p
Neutrophils	N	0.00116144
Dendritic.cells.activated	N	0.0148211
Monocytes	P	0.143596
Macrophages.M2	N	0.15553
B.cells.memory	P	0.2528
T.cells.CD4.memory.resting	N	0.304504
T.cells.gamma.delta	P	0.502729
Macrophages.M1	N	0.898785
NK.cells.resting	P	1.0812
Mast.cells.activated	N	1.3201
Eosinophils	N	1.37784
B.cells.naive	P	1.5124
Dendritic.cells.resting	N	1.8036
T.cells.follicular.helper	P	1.85294
Mast.cells.resting	P	2.00431
T.cells.CD4.memory.activated	P	2.03698
T.cells.CD8	P	2.11362
NK.cells.activated	N	2.16202
T.cells.CD4.naive	N	2.72862
Macrophages.M0	N	3.62653
Plasma.cells	P	5.42049
T.cells.regulatory..Tregs.	P	6.34429

## Sheet: LM22_cor
Supplementary Table 1. Relationship between different immune cells and survival.
From	To	correlation	test_P	stren
B.cells.memory	B.cells.naive	-0.403997	0	0.403997
Plasma.cells	B.cells.naive	0.570399	0	0.570399
T.cells.CD8	B.cells.naive	0.17483	8.22593e-05	0.17483
T.cells.CD4.naive	B.cells.naive	-0.268938	9.13685e-10	0.268938
T.cells.regulatory..Tregs.	B.cells.naive	0.331412	2.4869e-14	0.331412
NK.cells.resting	B.cells.naive	-0.282766	1.10517e-10	0.282766
Macrophages.M0	B.cells.naive	-0.296316	1.24187e-11	0.296316
B.cells.naive	B.cells.memory	-0.403997	0	0.403997
B.cells.naive	Plasma.cells	0.570399	0	0.570399
Macrophages.M0	Plasma.cells	-0.32108	1.67866e-13	0.32108
Macrophages.M2	Plasma.cells	-0.205413	3.47635e-06	0.205413
B.cells.naive	T.cells.CD8	0.17483	8.22593e-05	0.17483
T.cells.CD4.naive	T.cells.CD8	-0.321377	1.59206e-13	0.321377
T.cells.CD4.memory.resting	T.cells.CD8	-0.309006	1.44018e-12	0.309006
T.cells.CD4.memory.activated	T.cells.CD8	0.443117	0	0.443117
T.cells.follicular.helper	T.cells.CD8	0.363993	0	0.363993
T.cells.regulatory..Tregs.	T.cells.CD8	0.294064	1.80025e-11	0.294064
Monocytes	T.cells.CD8	0.317287	3.33511e-13	0.317287
Macrophages.M0	T.cells.CD8	-0.538947	0	0.538947
Macrophages.M1	T.cells.CD8	0.402087	0	0.402087
Mast.cells.resting	T.cells.CD8	0.183423	3.55663e-05	0.183423
Mast.cells.activated	T.cells.CD8	-0.357107	0	0.357107
B.cells.naive	T.cells.CD4.naive	-0.268938	9.13685e-10	0.268938
T.cells.CD8	T.cells.CD4.naive	-0.321377	1.59206e-13	0.321377
T.cells.follicular.helper	T.cells.CD4.naive	-0.25691	5.21661e-09	0.25691
T.cells.regulatory..Tregs.	T.cells.CD4.naive	-0.244692	2.80193e-08	0.244692
Monocytes	T.cells.CD4.naive	-0.189434	1.93297e-05	0.189434
Macrophages.M0	T.cells.CD4.naive	0.274572	3.91938e-10	0.274572
Macrophages.M1	T.cells.CD4.naive	-0.261733	2.6216e-09	0.261733
Macrophages.M2	T.cells.CD4.naive	-0.181539	4.28864e-05	0.181539
Mast.cells.resting	T.cells.CD4.naive	-0.266272	1.35442e-09	0.266272
Mast.cells.activated	T.cells.CD4.naive	0.330512	2.93099e-14	0.330512
T.cells.CD8	T.cells.CD4.memory.resting	-0.309006	1.44018e-12	0.309006
T.cells.follicular.helper	T.cells.CD4.memory.resting	-0.38002	0	0.38002
T.cells.regulatory..Tregs.	T.cells.CD4.memory.resting	-0.415304	0	0.415304
T.cells.CD8	T.cells.CD4.memory.activated	0.443117	0	0.443117
NK.cells.resting	T.cells.CD4.memory.activated	0.231793	1.50332e-07	0.231793
Macrophages.M0	T.cells.CD4.memory.activated	-0.365902	0	0.365902
Macrophages.M1	T.cells.CD4.memory.activated	0.293897	1.85052e-11	0.293897
Mast.cells.activated	T.cells.CD4.memory.activated	-0.295363	1.45373e-11	0.295363
T.cells.CD8	T.cells.follicular.helper	0.363993	0	0.363993
T.cells.CD4.naive	T.cells.follicular.helper	-0.25691	5.21661e-09	0.25691
T.cells.CD4.memory.resting	T.cells.follicular.helper	-0.38002	0	0.38002
T.cells.regulatory..Tregs.	T.cells.follicular.helper	0.31008	1.19438e-12	0.31008
NK.cells.activated	T.cells.follicular.helper	0.290569	3.18363e-11	0.290569
Macrophages.M0	T.cells.follicular.helper	-0.221008	5.69151e-07	0.221008
Macrophages.M1	T.cells.follicular.helper	0.290145	3.40963e-11	0.290145
Dendritic.cells.resting	T.cells.follicular.helper	0.180774	4.6246e-05	0.180774
Mast.cells.resting	T.cells.follicular.helper	0.174098	8.81886e-05	0.174098
Mast.cells.activated	T.cells.follicular.helper	-0.222127	4.97269e-07	0.222127
B.cells.naive	T.cells.regulatory..Tregs.	0.331412	2.4869e-14	0.331412
T.cells.CD8	T.cells.regulatory..Tregs.	0.294064	1.80025e-11	0.294064
T.cells.CD4.naive	T.cells.regulatory..Tregs.	-0.244692	2.80193e-08	0.244692
T.cells.CD4.memory.resting	T.cells.regulatory..Tregs.	-0.415304	0	0.415304
T.cells.follicular.helper	T.cells.regulatory..Tregs.	0.31008	1.19438e-12	0.31008
NK.cells.resting	T.cells.regulatory..Tregs.	-0.21554	1.09011e-06	0.21554
Mast.cells.activated	T.cells.regulatory..Tregs.	-0.173285	9.52489e-05	0.173285
B.cells.naive	NK.cells.resting	-0.282766	1.10517e-10	0.282766
T.cells.CD4.memory.activated	NK.cells.resting	0.231793	1.50332e-07	0.231793
T.cells.regulatory..Tregs.	NK.cells.resting	-0.21554	1.09011e-06	0.21554
NK.cells.activated	NK.cells.resting	-0.384018	0	0.384018
Mast.cells.resting	NK.cells.resting	-0.203836	4.1432e-06	0.203836
Mast.cells.activated	NK.cells.resting	0.189878	1.84633e-05	0.189878
T.cells.follicular.helper	NK.cells.activated	0.290569	3.18363e-11	0.290569
NK.cells.resting	NK.cells.activated	-0.384018	0	0.384018
Dendritic.cells.resting	NK.cells.activated	0.188571	2.11228e-05	0.188571
Mast.cells.resting	NK.cells.activated	0.312529	7.77156e-13	0.312529
Mast.cells.activated	NK.cells.activated	-0.342646	2.66454e-15	0.342646
T.cells.CD8	Monocytes	0.317287	3.33511e-13	0.317287
T.cells.CD4.naive	Monocytes	-0.189434	1.93297e-05	0.189434
Macrophages.M0	Monocytes	-0.532389	0	0.532389
Dendritic.cells.resting	Monocytes	0.207072	2.88624e-06	0.207072
Mast.cells.activated	Monocytes	-0.18639	2.63859e-05	0.18639
B.cells.naive	Macrophages.M0	-0.296316	1.24187e-11	0.296316
Plasma.cells	Macrophages.M0	-0.32108	1.67866e-13	0.32108
T.cells.CD8	Macrophages.M0	-0.538947	0	0.538947
T.cells.CD4.naive	Macrophages.M0	0.274572	3.91938e-10	0.274572
T.cells.CD4.memory.activated	Macrophages.M0	-0.365902	0	0.365902
T.cells.follicular.helper	Macrophages.M0	-0.221008	5.69151e-07	0.221008
Monocytes	Macrophages.M0	-0.532389	0	0.532389
Macrophages.M1	Macrophages.M0	-0.319258	2.33813e-13	0.319258
Dendritic.cells.resting	Macrophages.M0	-0.27302	4.95811e-10	0.27302
Mast.cells.resting	Macrophages.M0	-0.205297	3.52181e-06	0.205297
Mast.cells.activated	Macrophages.M0	0.250769	1.22772e-08	0.250769
T.cells.CD8	Macrophages.M1	0.402087	0	0.402087
T.cells.CD4.naive	Macrophages.M1	-0.261733	2.6216e-09	0.261733
T.cells.CD4.memory.activated	Macrophages.M1	0.293897	1.85052e-11	0.293897
T.cells.follicular.helper	Macrophages.M1	0.290145	3.40963e-11	0.290145
Macrophages.M0	Macrophages.M1	-0.319258	2.33813e-13	0.319258
Macrophages.M2	Macrophages.M1	0.217594	8.55657e-07	0.217594
Mast.cells.resting	Macrophages.M1	0.226181	3.03022e-07	0.226181
Mast.cells.activated	Macrophages.M1	-0.414575	0	0.414575
Plasma.cells	Macrophages.M2	-0.205413	3.47635e-06	0.205413
T.cells.CD4.naive	Macrophages.M2	-0.181539	4.28864e-05	0.181539
Macrophages.M1	Macrophages.M2	0.217594	8.55657e-07	0.217594
Mast.cells.resting	Macrophages.M2	0.185944	2.76062e-05	0.185944
Mast.cells.activated	Macrophages.M2	-0.264786	1.6835e-09	0.264786
Eosinophils	Macrophages.M2	-0.182375	3.9479e-05	0.182375
T.cells.follicular.helper	Dendritic.cells.resting	0.180774	4.6246e-05	0.180774
NK.cells.activated	Dendritic.cells.resting	0.188571	2.11228e-05	0.188571
Monocytes	Dendritic.cells.resting	0.207072	2.88624e-06	0.207072
Macrophages.M0	Dendritic.cells.resting	-0.27302	4.95811e-10	0.27302
Mast.cells.resting	Dendritic.cells.resting	0.21644	9.80699e-07	0.21644
T.cells.CD8	Mast.cells.resting	0.183423	3.55663e-05	0.183423
T.cells.CD4.naive	Mast.cells.resting	-0.266272	1.35442e-09	0.266272
T.cells.follicular.helper	Mast.cells.resting	0.174098	8.81886e-05	0.174098
NK.cells.resting	Mast.cells.resting	-0.203836	4.1432e-06	0.203836
NK.cells.activated	Mast.cells.resting	0.312529	7.77156e-13	0.312529
Macrophages.M0	Mast.cells.resting	-0.205297	3.52181e-06	0.205297
Macrophages.M1	Mast.cells.resting	0.226181	3.03022e-07	0.226181
Macrophages.M2	Mast.cells.resting	0.185944	2.76062e-05	0.185944
Dendritic.cells.resting	Mast.cells.resting	0.21644	9.80699e-07	0.21644
Mast.cells.activated	Mast.cells.resting	-0.615124	0	0.615124
T.cells.CD8	Mast.cells.activated	-0.357107	0	0.357107
T.cells.CD4.naive	Mast.cells.activated	0.330512	2.93099e-14	0.330512
T.cells.CD4.memory.activated	Mast.cells.activated	-0.295363	1.45373e-11	0.295363
T.cells.follicular.helper	Mast.cells.activated	-0.222127	4.97269e-07	0.222127
T.cells.regulatory..Tregs.	Mast.cells.activated	-0.173285	9.52489e-05	0.173285
NK.cells.resting	Mast.cells.activated	0.189878	1.84633e-05	0.189878
NK.cells.activated	Mast.cells.activated	-0.342646	2.66454e-15	0.342646
Monocytes	Mast.cells.activated	-0.18639	2.63859e-05	0.18639
Macrophages.M0	Mast.cells.activated	0.250769	1.22772e-08	0.250769
Macrophages.M1	Mast.cells.activated	-0.414575	0	0.414575
Macrophages.M2	Mast.cells.activated	-0.264786	1.6835e-09	0.264786
Mast.cells.resting	Mast.cells.activated	-0.615124	0	0.615124
Neutrophils	Mast.cells.activated	0.275366	3.47346e-10	0.275366
Macrophages.M2	Eosinophils	-0.182375	3.9479e-05	0.182375
Mast.cells.activated	Neutrophils	0.275366	3.47346e-10	0.275366
