# Supplementary material for: Comprehensive characterization of the tumor microenvironment for assessing immunotherapy outcome in patients with head and neck squamous cell carcinoma
Source: Aging (Albany NY). 2020 Nov 18;12(22):22509–26. doi: 10.18632/aging.103460 (PMC7746351; doi:10.18632/aging.103460)
Supplement: Supplementary Table 2 [file aging-12-103460-s003..xlsx]

## Sheet: C1-C2
	logFC	AveExpr	t	P.Value	adj.P.Val	B
CXCL10	2.77695	5.15936	11.0385	1.63593e-25	2.41573e-21	47.0758
CXCL11	2.92779	3.06344	10.9769	2.8357e-25	2.41573e-21	46.5384
IDO1	2.53457	3.79908	10.5138	1.67781e-23	9.52885e-20	42.553
FASLG	2.04763	-0.816817	10.4353	3.31475e-23	1.41192e-19	41.8881
GBP1	1.52117	6.65432	10.3366	7.76513e-23	2.37751e-19	41.057
GZMB	1.70991	2.80009	10.3103	9.73874e-23	2.37751e-19	40.8359
TAP1	1.08281	7.98527	10.3023	1.04243e-22	2.37751e-19	40.7695
GBP4	1.78572	4.94738	10.2944	1.11633e-22	2.37751e-19	40.7026
CD8A	1.88411	2.68391	10.2759	1.3077e-22	2.47562e-19	40.5482
APOL3	1.36151	4.83719	10.0985	5.93225e-22	1.01074e-18	39.0721
ETV7	1.44437	3.34466	10.0679	7.68493e-22	1.19033e-18	38.8195
USP30-AS1	1.74466	-0.862552	10.0103	1.2495e-21	1.77409e-18	38.3451
IL12RB1	1.46413	1.86729	9.96877	1.7723e-21	2.3228e-18	38.004
APOL6	1.13846	6.32177	9.81819	6.24275e-21	7.1791e-18	36.7754
CD3G	1.606	1.28121	9.81426	6.45031e-21	7.1791e-18	36.7435
ZBP1	1.73271	1.45829	9.80894	6.74173e-21	7.1791e-18	36.7004
SLA2	1.51146	1.16495	9.78652	8.1227e-21	8.14086e-18	36.5186
WARS	1.39479	8.43721	9.67734	2.00411e-20	1.89701e-17	35.6376
TLR3	1.40131	2.73368	9.66144	2.28439e-20	2.04849e-17	35.5099
CXCL9	2.3603	5.33503	9.65329	2.44286e-20	2.08107e-17	35.4444
CD2	1.5026	3.10054	9.64422	2.6321e-20	2.13551e-17	35.3717
SECTM1	1.24186	4.88901	9.63578	2.82119e-20	2.18488e-17	35.304
TRIM22	1.3262	5.90454	9.58316	4.34403e-20	3.21798e-17	34.883
NKG7	1.69921	2.31291	9.55234	5.5893e-20	3.92605e-17	34.6372
IRF1	1.06179	6.33075	9.54864	5.76073e-20	3.92605e-17	34.6077
CXCR6	1.44015	1.93229	9.54219	6.07245e-20	3.97932e-17	34.5563
GBP1P1	1.27856	2.77273	9.5357	6.40284e-20	4.04043e-17	34.5047
LAG3	1.57885	2.4623	9.50804	8.02256e-20	4.88173e-17	34.2847
CXCR3	1.75679	0.896483	9.4746	1.05299e-19	6.16679e-17	34.0195
GZMH	1.96752	0.760694	9.47082	1.08583e-19	6.16679e-17	33.9896
MMP9	-1.50065	6.50795	-9.39888	1.94492e-19	1.06116e-16	33.4213
IFIT3	1.57789	5.90339	9.39586	1.99302e-19	1.06116e-16	33.3974
SIRPG	1.60727	0.810191	9.38427	2.18844e-19	1.1299e-16	33.3063
CD3D	1.44885	2.18651	9.35178	2.84401e-19	1.42518e-16	33.0508
BTN3A3	0.982862	4.52323	9.33302	3.30738e-19	1.61004e-16	32.9036
STAT1	1.06803	8.63518	9.32461	3.53888e-19	1.64375e-16	32.8377
LAP3	0.870745	6.74098	9.32353	3.5696e-19	1.64375e-16	32.8293
CD3E	1.36897	3.44083	9.30912	4.00774e-19	1.79694e-16	32.7164
TRGC2	1.71665	-0.974969	9.28347	4.92318e-19	2.1508e-16	32.5159
RTP4	1.34223	3.29529	9.27217	5.38935e-19	2.29559e-16	32.4277
SAMHD1	1.03252	6.4752	9.26243	5.82629e-19	2.42118e-16	32.3517
IL15RA	0.795755	4.1564	9.21849	8.27596e-19	3.35728e-16	32.0096
KIR2DL4	1.86476	-1.32734	9.20882	8.93939e-19	3.54208e-16	31.9344
PYHIN1	1.5074	-0.171229	9.17007	1.21679e-18	4.71174e-16	31.6339
GBP5	1.96794	5.12591	9.16177	1.2997e-18	4.92096e-16	31.5697
JAKMIP1	1.52715	-0.65674	9.14129	1.52906e-18	5.66352e-16	31.4113
SAMD9L	1.29051	4.87158	9.07163	2.65243e-18	9.56701e-16	30.8745
GPR171	1.45778	-0.274794	9.0696	2.69525e-18	9.56701e-16	30.8589
CMPK2	1.44357	3.87913	9.05775	2.9592e-18	1.02896e-15	30.7679
GBP2	1.025	6.18443	9.04727	3.21363e-18	1.09508e-15	30.6875
ICOS	1.37174	1.20608	9.04154	3.362e-18	1.12317e-15	30.6436
ABCD2	1.57215	-1.49934	9.03414	3.56353e-18	1.14956e-15	30.5868
PSMB10	0.861481	4.84914	9.03116	3.64796e-18	1.14956e-15	30.564
GZMA	1.70788	2.30506	9.03102	3.65187e-18	1.14956e-15	30.563
HSH2D	1.25801	2.01233	9.02898	3.71087e-18	1.14956e-15	30.5474
HERC6	1.30893	5.26719	9.02421	3.8526e-18	1.17215e-15	30.5109
HLA-E	0.630363	9.70705	9.02035	3.97139e-18	1.1871e-15	30.4813
PSMB9	1.12453	6.0499	8.97985	5.45592e-18	1.60272e-15	30.1719
B2M	0.748949	11.262	8.97278	5.76661e-18	1.66528e-15	30.1179
UBE2L6	0.917135	6.98504	8.96781	5.99508e-18	1.7024e-15	30.0801
TRIM69	0.687245	5.58353	8.90645	9.67836e-18	2.70328e-15	29.6135
TRAFD1	0.494596	5.8065	8.90433	9.83936e-18	2.70392e-15	29.5974
DDX58	1.07419	5.39191	8.86863	1.29863e-17	3.51206e-15	29.3271
TRAT1	1.89785	-1.36083	8.83915	1.63207e-17	4.34488e-15	29.1046
IKZF3	1.52727	2.99742	8.83617	1.67022e-17	4.37803e-15	29.0821
BCL2L14	1.60006	-0.405341	8.80844	2.06962e-17	5.34275e-15	28.8732
PSMB8	0.776917	6.71481	8.79901	2.22603e-17	5.66075e-15	28.8023
FGL2	1.35387	3.72047	8.78146	2.54866e-17	6.3859e-15	28.6705
CD96	1.20114	2.16051	8.75644	3.09032e-17	7.52863e-15	28.4828
LAMP3	1.21114	5.37634	8.75632	3.09311e-17	7.52863e-15	28.482
CD27	1.39475	1.71247	8.75283	3.17729e-17	7.62459e-15	28.4558
TRIM14	0.709379	5.72732	8.73466	3.65344e-17	8.64546e-15	28.3199
KLRC1	1.51883	-1.36201	8.72881	3.82106e-17	8.91825e-15	28.2762
BATF2	1.73157	2.77164	8.72002	4.0877e-17	9.41165e-15	28.2105
RARRES3	1.36484	4.34645	8.70868	4.45919e-17	1.01301e-14	28.1258
ISG20	0.992011	4.7753	8.69898	4.80301e-17	1.07676e-14	28.0535
SCML4	1.63209	-1.30049	8.68439	5.37028e-17	1.1883e-14	27.9448
PDCD1	1.44092	0.803716	8.62096	8.71222e-17	1.88324e-14	27.4738
UBA7	0.943158	4.96273	8.62066	8.73201e-17	1.88324e-14	27.4716
IFIH1	1.04821	5.61232	8.60928	9.52114e-17	2.02777e-14	27.3874
TAP2	0.68888	6.22434	8.57573	1.22818e-16	2.58342e-14	27.1395
CIITA	1.35812	3.98308	8.5717	1.26631e-16	2.60962e-14	27.1098
NLRC5	0.853079	6.00147	8.57107	1.27233e-16	2.60962e-14	27.1052
GRAP2	1.21968	0.855729	8.5696	1.28658e-16	2.60962e-14	27.0943
APOL2	0.832018	5.97583	8.56541	1.32805e-16	2.66203e-14	27.0635
CASP1	0.811539	4.93806	8.56255	1.35718e-16	2.68879e-14	27.0423
UBD	1.96368	1.64076	8.53746	1.6407e-16	3.21313e-14	26.8577
IFI44L	1.71051	4.74407	8.51754	1.90692e-16	3.69206e-14	26.7114
SLFN12L	1.00016	-0.0611272	8.50332	2.12264e-16	4.06354e-14	26.6071
OAS1	1.02558	6.37844	8.49332	2.28867e-16	4.33271e-14	26.5338
ZNF683	1.82542	-0.149315	8.47949	2.53963e-16	4.75496e-14	26.4325
TRBC2	1.36292	3.22531	8.45317	3.09451e-16	5.73091e-14	26.2403
OAS2	1.13101	7.1622	8.42961	3.69192e-16	6.76375e-14	26.0685
IFIT2	1.37318	4.20086	8.42757	3.74898e-16	6.79522e-14	26.0536
TRIM21	0.719889	4.82081	8.41738	4.04593e-16	7.25627e-14	25.9794
PRF1	1.33212	3.16752	8.41336	4.16918e-16	7.39943e-14	25.9502
BTN3A1	0.841831	4.7224	8.3676	5.86545e-16	1.03026e-13	25.6182
HLA-DPA1	1.30095	7.01571	8.35724	6.33596e-16	1.09486e-13	25.5431
GIMAP7	1.12818	2.01134	8.35631	6.37959e-16	1.09486e-13	25.5364
PARP9	0.796145	6.75617	8.35534	6.42602e-16	1.09486e-13	25.5294
CD7	1.19045	3.10209	8.35031	6.67062e-16	1.12529e-13	25.493
SLAMF6	1.43649	1.09608	8.34784	6.79432e-16	1.13492e-13	25.4752
RP11-1094M14.8	1.42996	-1.35376	8.34363	7.01041e-16	1.15964e-13	25.4447
CD74	1.24683	10.0517	8.30507	9.33137e-16	1.52873e-13	25.1665
ACSL5	1.20257	4.03897	8.30363	9.43119e-16	1.53037e-13	25.1562
TRAC	1.22201	3.91986	8.2721	1.19076e-15	1.91398e-13	24.9294
HLA-DRA	1.22354	8.57392	8.26334	1.27024e-15	2.02265e-13	24.8666
CD226	1.17659	0.374265	8.25173	1.38384e-15	2.18313e-13	24.7833
FBXO6	0.681838	4.31375	8.24864	1.41572e-15	2.21293e-13	24.7611
ITK	1.38329	1.44304	8.19332	2.12584e-15	3.29273e-13	24.3659
TIGIT	1.28855	2.29918	8.17849	2.36996e-15	3.63778e-13	24.2602
TESPA1	1.15354	0.47441	8.17473	2.43608e-15	3.70589e-13	24.2334
NMI	0.573317	5.11665	8.17342	2.45955e-15	3.70848e-13	24.2241
OR2I1P	1.94606	1.18793	8.15437	2.82708e-15	4.22524e-13	24.0887
JAK2	0.890271	3.82058	8.15294	2.85686e-15	4.23263e-13	24.0785
STAT2	0.620885	7.00921	8.14911	2.93774e-15	4.27824e-13	24.0514
MX1	1.24125	7.47465	8.14827	2.9559e-15	4.27824e-13	24.0454
IFIT5	0.736779	4.5658	8.14794	2.96298e-15	4.27824e-13	24.043
OASL	1.43864	4.93931	8.14602	3.00486e-15	4.30225e-13	24.0294
SH2D1A	1.40206	0.313118	8.13856	3.17303e-15	4.50517e-13	23.9765
TRBV28	1.35943	1.52027	8.12054	3.61846e-15	5.09515e-13	23.8488
GIMAP2	0.949396	1.99841	8.11662	3.72312e-15	5.19956e-13	23.821
RSAD2	1.49712	4.91874	8.10779	3.97033e-15	5.49972e-13	23.7586
UBASH3A	1.32183	0.0637458	8.08779	4.59155e-15	6.30893e-13	23.6173
CCR5	1.32431	2.24829	8.07844	4.91368e-15	6.69755e-13	23.5513
HCP5	0.927535	5.83842	8.07345	5.09497e-15	6.88953e-13	23.5161
CNDP2	0.572135	7.16555	8.06575	5.38762e-15	7.2279e-13	23.4618
LINC00426	1.22207	-1.0701	8.04488	6.26597e-15	8.3404e-13	23.3151
MPEG1	1.21227	3.88452	8.04381	6.31478e-15	8.3404e-13	23.3075
TBX21	1.36199	-0.599859	8.04068	6.45939e-15	8.46578e-13	23.2855
DHX58	0.74371	4.07265	8.03957	6.51143e-15	8.46883e-13	23.2777
GZMK	1.74536	0.211644	8.02413	7.27966e-15	9.39628e-13	23.1693
HLA-DRB1	1.22632	7.83851	8.01506	7.77236e-15	9.95681e-13	23.1057
TBC1D10C	1.14022	2.19536	8.01203	7.94375e-15	1.01004e-12	23.0845
IL18BP	0.957112	3.40545	8.00649	8.2679e-15	1.04347e-12	23.0456
ITGAL	1.28392	3.39488	8.0012	8.58875e-15	1.07599e-12	23.0086
IFI35	0.887358	5.59462	7.9847	9.67188e-15	1.20284e-12	22.8932
RGS18	1.14094	-0.135462	7.98016	9.99292e-15	1.23376e-12	22.8615
PARP14	0.739375	7.02004	7.97636	1.02694e-14	1.25878e-12	22.835
IL18RAP	1.24142	-0.548356	7.97364	1.04727e-14	1.27453e-12	22.8159
CASP7	0.537958	5.4249	7.97198	1.0598e-14	1.28064e-12	22.8044
NAPSB	1.24278	1.99279	7.96533	1.11164e-14	1.33381e-12	22.758
RNF213	0.729046	7.71578	7.96362	1.12538e-14	1.34085e-12	22.746
FGD2	0.929643	2.40601	7.93829	1.34952e-14	1.59675e-12	22.5696
CTLA4	1.18853	1.51535	7.93272	1.40442e-14	1.65024e-12	22.5308
GIMAP5	1.15555	-0.860249	7.92636	1.46977e-14	1.70376e-12	22.4867
CD8B	1.62709	0.192759	7.92634	1.46996e-14	1.70376e-12	22.4865
CD244	1.11951	-0.254968	7.90705	1.68727e-14	1.94241e-12	22.3526
FUT7	1.16308	-0.333763	7.90548	1.70627e-14	1.9511e-12	22.3417
HLA-C	0.754596	10.3041	7.886	1.9607e-14	2.22709e-12	22.2067
CST7	1.03651	2.28973	7.88308	2.00188e-14	2.25729e-12	22.1865
TRIM38	0.508346	5.03457	7.88225	2.01378e-14	2.25729e-12	22.1808
FAM26F	1.24677	2.20558	7.84695	2.58834e-14	2.88236e-12	21.937
IRF8	1.17987	2.9613	7.83661	2.78548e-14	3.08176e-12	21.8657
MS4A6A	1.07709	4.02335	7.81794	3.17935e-14	3.49482e-12	21.7372
C5orf56	0.947011	1.2824	7.80819	3.40649e-14	3.72049e-12	21.6702
SAMSN1	0.930917	2.57154	7.79631	3.70487e-14	4.02061e-12	21.5887
APOL4	1.15378	3.55895	7.79144	3.83473e-14	4.1352e-12	21.5552
SASH3	1.0665	3.32161	7.79034	3.86453e-14	4.14112e-12	21.5477
CD247	1.14731	2.0524	7.77187	4.40221e-14	4.68781e-12	21.4212
TRANK1	0.874013	4.58581	7.75924	4.81209e-14	5.09245e-12	21.3348
IKZF1	1.1546	2.965	7.66741	9.15846e-14	9.63221e-12	20.71
TRG-AS1	1.16733	-0.562489	7.64001	1.10848e-13	1.15593e-11	20.5248
TAGAP	1.08711	2.22744	7.63947	1.11264e-13	1.15593e-11	20.5211
HLA-DMA	1.05459	5.17954	7.6226	1.25108e-13	1.29187e-11	20.4073
PLSCR1	0.664524	6.4341	7.61288	1.33839e-13	1.3737e-11	20.3418
OAS3	0.973493	7.49017	7.59144	1.55281e-13	1.58424e-11	20.1976
GVINP1	1.29135	0.675046	7.57999	1.68088e-13	1.7047e-11	20.1207
PSME2	0.629472	7.30243	7.57318	1.76185e-13	1.77624e-11	20.0751
CD69	1.16533	1.38332	7.57213	1.7747e-13	1.77867e-11	20.068
NUGGC	1.28071	-1.23827	7.56598	1.85172e-13	1.84501e-11	20.0268
ZNF831	1.45082	-0.431467	7.55497	1.998e-13	1.97918e-11	19.9531
ACE2	1.34368	1.58061	7.55099	2.05357e-13	2.02247e-11	19.9264
P2RY13	1.3082	0.543784	7.52888	2.39131e-13	2.34156e-11	19.7787
EPSTI1	1.09739	5.07457	7.52362	2.4795e-13	2.40333e-11	19.7436
GIMAP4	0.903682	3.44354	7.52344	2.48261e-13	2.40333e-11	19.7424
SLAMF7	1.1123	3.90909	7.50687	2.78195e-13	2.6779e-11	19.6319
IL2RB	1.0764	3.8616	7.50229	2.87072e-13	2.74783e-11	19.6015
HLA-DPB1	1.06954	6.92252	7.50133	2.88973e-13	2.75057e-11	19.5951
LY9	1.25624	0.279465	7.49661	2.98482e-13	2.82186e-11	19.5637
HLA-F	0.90624	6.58272	7.49598	2.99775e-13	2.82186e-11	19.5595
SIT1	1.20116	0.572557	7.47312	3.50587e-13	3.28203e-11	19.4076
ARHGAP15	0.897149	1.49904	7.47077	3.56267e-13	3.31699e-11	19.392
CARD16	0.676799	2.3066	7.46767	3.63905e-13	3.36968e-11	19.3714
ABI3	0.849364	3.08046	7.44639	4.20815e-13	3.87559e-11	19.2305
HLA-DMB	1.12285	4.35073	7.44393	4.27928e-13	3.91991e-11	19.2143
HLA-DRB5	1.21438	5.93432	7.42346	4.91977e-13	4.48252e-11	19.079
MX2	1.12545	5.46553	7.41948	5.05491e-13	4.58115e-11	19.0527
RP11-532F6.3	1.13981	-1.35278	7.41141	5.34012e-13	4.81402e-11	18.9995
HLA-B	0.799598	10.9879	7.39129	6.12195e-13	5.48978e-11	18.867
KLRB1	1.11837	-0.0513322	7.38341	6.45789e-13	5.7607e-11	18.8152
TIFAB	1.3928	-0.925092	7.37963	6.6255e-13	5.87945e-11	18.7904
PSME1	0.479025	7.57763	7.3766	6.76274e-13	5.94515e-11	18.7705
IPCEF1	0.954992	0.581759	7.37646	6.76933e-13	5.94515e-11	18.7696
DDX60	1.07591	5.82366	7.36513	7.30882e-13	6.38603e-11	18.6952
TRBV20-1	1.39721	-1.32911	7.36153	7.48882e-13	6.50992e-11	18.6716
SLC25A28	0.46754	5.39424	7.34191	8.55026e-13	7.39489e-11	18.5432
APOBEC3G	1.00205	3.6655	7.32391	9.65382e-13	8.30716e-11	18.4255
FLT3	1.18955	-1.10836	7.32093	9.84957e-13	8.43302e-11	18.406
APOBEC3H	1.09933	-0.939893	7.31785	1.00556e-12	8.5664e-11	18.386
DOCK8	0.886973	3.91441	7.30284	1.1124e-12	9.42942e-11	18.2881
AIM2	1.37175	3.66654	7.30144	1.12293e-12	9.47153e-11	18.279
SP110	0.394494	-1.22821	7.29099	1.20459e-12	1.01103e-10	18.2109
GZMM	1.27808	-0.319271	7.28595	1.24602e-12	1.04067e-10	18.1781
TNFSF13B	1.04071	2.45982	7.28465	1.25692e-12	1.04466e-10	18.1697
GPR65	0.950153	0.832716	7.28196	1.27974e-12	1.05696e-10	18.1523
HLA-A	0.700667	10.3796	7.28145	1.28413e-12	1.05696e-10	18.149
IRF4	1.16171	1.92722	7.27297	1.35928e-12	1.11344e-10	18.0938
SNX20	1.0014	2.21405	7.26417	1.44176e-12	1.17534e-10	18.0368
GPR114	1.26467	0.694519	7.26269	1.45609e-12	1.1761e-10	18.0272
PSMB8-AS1	0.664796	2.84872	7.26265	1.45649e-12	1.1761e-10	18.0269
IFIT1	1.36031	5.3127	7.26149	1.46791e-12	1.17973e-10	18.0193
IFI44	1.10559	5.40215	7.25855	1.49707e-12	1.19752e-10	18.0003
PML	0.580297	7.35546	7.25274	1.55637e-12	1.23365e-10	17.9626
MAP4K1	0.990964	2.32157	7.2527	1.55672e-12	1.23365e-10	17.9624
SLAMF1	1.04498	0.844561	7.24549	1.63364e-12	1.28861e-10	17.9157
CD48	1.10491	2.56599	7.24237	1.66794e-12	1.3096e-10	17.8955
CFH	0.918852	5.66539	7.24165	1.67602e-12	1.30991e-10	17.8909
SIGLEC10	1.11781	2.29925	7.20113	2.19543e-12	1.70802e-10	17.6293
ARHGAP9	0.887744	2.76414	7.19427	2.29785e-12	1.77958e-10	17.5851
GPBAR1	0.816329	-1.1498	7.193	2.31735e-12	1.78656e-10	17.577
BIN2	0.934265	2.21664	7.18228	2.48818e-12	1.90962e-10	17.508
SAMD3	1.25873	-1.37511	7.18048	2.51812e-12	1.92393e-10	17.4965
C1QC	1.0581	6.13597	7.16624	2.76748e-12	2.10501e-10	17.405
P2RY10	1.28333	-0.283951	7.16366	2.81509e-12	2.13171e-10	17.3885
PTPRC	1.18367	4.46701	7.15972	2.88955e-12	2.17841e-10	17.3632
MMP25	0.864912	1.77157	7.15846	2.91365e-12	2.18691e-10	17.3551
TLR7	1.31705	0.389427	7.14629	3.15794e-12	2.35987e-10	17.2772
DTX3L	0.584306	6.91584	7.13928	3.30753e-12	2.46086e-10	17.2323
RASAL3	0.89471	2.69594	7.13064	3.50164e-12	2.59395e-10	17.1771
CASP10	0.659793	4.0412	7.09823	4.33474e-12	3.1972e-10	16.9704
MCOLN2	0.888178	1.05058	7.09468	4.43704e-12	3.25855e-10	16.9478
CD5	1.12571	2.04069	7.09054	4.55955e-12	3.33414e-10	16.9215
FOXP3	0.964916	2.60998	7.07693	4.9856e-12	3.63011e-10	16.835
GIMAP8	0.801875	2.59089	7.06158	5.51298e-12	3.99703e-10	16.7376
CRTAM	1.2098	-0.603268	7.06011	5.56625e-12	4.01778e-10	16.7283
THEMIS	1.41229	-0.474524	7.0595	5.58877e-12	4.01778e-10	16.7244
TRDC	1.35006	-0.844807	7.0411	6.30306e-12	4.49713e-10	16.608
GIMAP1	0.872221	1.54958	7.04097	6.30834e-12	4.49713e-10	16.6071
CCL4	1.00715	2.5483	7.03714	6.46834e-12	4.59198e-10	16.5829
PPP1R16B	0.966675	2.77989	7.0153	7.45863e-12	5.27303e-10	16.445
USP18	0.924013	3.3438	7.01194	7.62349e-12	5.35595e-10	16.4238
TNFSF10	0.827191	7.73085	7.01163	7.63878e-12	5.35595e-10	16.4219
CD6	0.965655	2.65651	6.98124	9.30681e-12	6.49874e-10	16.2307
2019-09-01	0.80907	2.43715	6.97982	9.39293e-12	6.53211e-10	16.2218
IFITM1	0.895641	6.99112	6.974	9.75438e-12	6.7559e-10	16.1853
C1QB	1.11114	6.22392	6.96861	1.01011e-11	6.96775e-10	16.1515
ARHGAP25	0.681651	3.53779	6.95243	1.12167e-11	7.70608e-10	16.0501
GNGT2	0.808848	0.266444	6.94462	1.17979e-11	8.07281e-10	16.0012
MOV10	0.456153	5.99122	6.94264	1.19498e-11	8.144e-10	15.9889
NLRC3	0.893932	1.6656	6.89719	1.60156e-11	1.08715e-09	15.7055
P2RY14	1.01164	-0.597442	6.88458	1.73673e-11	1.16977e-09	15.6272
LAX1	1.19303	0.313826	6.88433	1.73945e-11	1.16977e-09	15.6256
HLA-DQB1	1.12155	6.19247	6.88394	1.74387e-11	1.16977e-09	15.6232
TDRD7	0.539152	4.57955	6.88148	1.77156e-11	1.18368e-09	15.6079
CLEC2D	0.797187	2.29046	6.88025	1.78561e-11	1.18841e-09	15.6003
GPR55	0.998985	-0.933983	6.87472	1.8501e-11	1.22653e-09	15.566
NUB1	0.417357	5.99976	6.85921	2.04334e-11	1.3494e-09	15.4699
CD274	1.10394	3.28046	6.84967	2.17191e-11	1.42876e-09	15.4109
ITGB7	0.977545	1.61218	6.84825	2.19168e-11	1.43623e-09	15.4021
IL7	1.04096	0.899451	6.84465	2.24262e-11	1.46397e-09	15.3799
CEACAM21	0.951688	-0.400562	6.84284	2.26867e-11	1.47533e-09	15.3687
GIMAP6	0.904409	2.90911	6.84062	2.30107e-11	1.49071e-09	15.355
EOMES	1.149	0.196476	6.8323	2.42658e-11	1.56606e-09	15.3037
BTLA	1.13201	-1.26052	6.82146	2.60031e-11	1.67185e-09	15.2368
GPR34	0.949331	1.07661	6.81107	2.77819e-11	1.77951e-09	15.1728
APOL1	1.01483	8.02883	6.80396	2.90666e-11	1.85482e-09	15.1291
IL21R	1.07899	1.75899	6.8023	2.93743e-11	1.86746e-09	15.1189
ACY3	1.07407	-0.352049	6.78615	3.25477e-11	2.06152e-09	15.0197
CORO1A	0.790175	5.29009	6.78279	3.32498e-11	2.09818e-09	14.9991
RP11-400K9.4	1.34329	0.642903	6.77057	3.59267e-11	2.25874e-09	14.9242
PCED1B-AS1	0.892874	1.43744	6.76981	3.61008e-11	2.26135e-09	14.9196
SLA	0.892538	3.40196	6.76475	3.72742e-11	2.32629e-09	14.8886
RNASE6	0.858317	2.47701	6.7569	3.9173e-11	2.43588e-09	14.8406
CEACAM4	0.977656	-1.19648	6.74442	4.23874e-11	2.62617e-09	14.7644
TAPBPL	0.547576	4.86464	6.74317	4.27238e-11	2.63742e-09	14.7567
ARHGDIB	0.61201	6.21908	6.73182	4.58933e-11	2.82285e-09	14.6876
SIDT1	1.03954	1.26208	6.7197	4.9538e-11	3.03607e-09	14.6137
FYB	1.13376	4.23132	6.70693	5.368e-11	3.27814e-09	14.5361
HLA-DOA	1.15871	3.52887	6.69336	5.84572e-11	3.55712e-09	14.4537
HLA-DQA1	1.083	5.98074	6.67004	6.76547e-11	4.10214e-09	14.3125
HNRNPA1P21	0.895299	0.344109	6.66472	6.99455e-11	4.21838e-09	14.2804
STARD5	0.694514	3.46643	6.66444	7.0067e-11	4.21838e-09	14.2787
FLT3LG	0.625559	1.11132	6.65141	7.60121e-11	4.56019e-09	14.2
LILRB5	1.05568	1.10134	6.63998	8.16327e-11	4.88021e-09	14.1311
RHOH	0.88028	1.92297	6.62913	8.73474e-11	5.20359e-09	14.0657
CXorf21	0.924402	0.123531	6.62753	8.82203e-11	5.23727e-09	14.0561
BST2	1.08148	7.46149	6.6156	9.5017e-11	5.62118e-09	13.9844
WAS	0.828741	2.80969	6.61017	9.82813e-11	5.79418e-09	13.9518
ZNFX1	0.534879	6.49663	6.60396	1.02148e-10	6.00135e-09	13.9145
CTSW	1.12011	1.71315	6.6023	1.03205e-10	6.04264e-09	13.9046
CCL8	1.18953	0.356553	6.6008	1.0417e-10	6.07822e-09	13.8956
TLR10	1.12755	-0.59245	6.59813	1.0591e-10	6.15871e-09	13.8796
AKNA	0.643367	4.65707	6.58611	1.14103e-10	6.61256e-09	13.8077
DDX60L	0.730687	4.81472	6.57851	1.19604e-10	6.90786e-09	13.7622
EIF4E3	0.608477	3.72151	6.55993	1.34161e-10	7.72244e-09	13.6513
INPP1	0.659681	4.98226	6.55562	1.37778e-10	7.90392e-09	13.6256
CCL5	1.12899	5.2979	6.54691	1.45384e-10	8.31226e-09	13.5737
GPR82	0.958931	-0.967357	6.54584	1.46355e-10	8.33978e-09	13.5673
IL10RA	0.886944	3.77336	6.54233	1.49551e-10	8.49349e-09	13.5464
ZBTB32	0.879217	-0.0293496	6.54179	1.50053e-10	8.49368e-09	13.5432
CXCL13	1.24651	3.65945	6.53741	1.54152e-10	8.69685e-09	13.5172
PTGES3P1	0.472253	1.57855	6.53473	1.56715e-10	8.81225e-09	13.5013
BATF	0.863826	1.95908	6.53407	1.57357e-10	8.81924e-09	13.4973
LPAR6	0.698256	4.83917	6.52294	1.68514e-10	9.41359e-09	13.4312
ZAP70	1.01495	1.97841	6.50502	1.88119e-10	1.04744e-08	13.3249
GCH1	0.570685	3.92153	6.50079	1.93058e-10	1.07144e-08	13.2999
NCF4	0.716802	2.69125	6.49991	1.94102e-10	1.07374e-08	13.2947
PATL2	0.840878	-0.427398	6.49478	2.00305e-10	1.10446e-08	13.2644
DOK2	0.837549	2.76569	6.48827	2.08457e-10	1.14571e-08	13.2259
SKAP1	1.01957	1.0391	6.47316	2.28639e-10	1.25259e-08	13.1367
APOBEC3D	0.932365	1.81157	6.47073	2.32058e-10	1.26725e-08	13.1224
NPM1P25	0.833784	-0.953882	6.46194	2.44841e-10	1.33278e-08	13.0706
TXK	0.84277	-1.2596	6.45665	2.52876e-10	1.37213e-08	13.0395
SELL	1.07674	2.561	6.45566	2.54413e-10	1.37609e-08	13.0336
C1QA	1.00611	6.01718	6.45409	2.56851e-10	1.38488e-08	13.0244
TNFAIP8L2	0.835887	1.26778	6.45316	2.58308e-10	1.38534e-08	13.0189
C19orf35	0.859964	-1.5591	6.453	2.58561e-10	1.38534e-08	13.018
LTA	0.983606	-0.94516	6.44667	2.68741e-10	1.43536e-08	12.9807
TRIM26	0.384352	6.23096	6.44255	2.75564e-10	1.4672e-08	12.9565
CLEC10A	1.12336	1.09635	6.43665	2.85637e-10	1.5161e-08	12.9219
PTPN22	0.861837	1.53668	6.41738	3.21111e-10	1.6991e-08	12.809
EVI2B	0.913381	2.64072	6.38819	3.83216e-10	2.02143e-08	12.6384
FCRL3	1.31667	-0.655532	6.37877	4.05668e-10	2.13326e-08	12.5835
LCP2	0.804399	3.95292	6.36917	4.29862e-10	2.25354e-08	12.5276
MNDA	0.899415	2.34445	6.35921	4.56444e-10	2.38555e-08	12.4698
RAMP3	0.677443	2.96188	6.35774	4.60523e-10	2.39951e-08	12.4612
GFI1	0.85491	1.09287	6.35544	4.66923e-10	2.42543e-08	12.4479
TMEM229B	1.01617	3.05001	6.34948	4.83983e-10	2.50642e-08	12.4133
PSME2P2	0.617501	0.48295	6.34719	4.90697e-10	2.52707e-08	12.4
HERC5	0.926213	3.82874	6.34682	4.91786e-10	2.52707e-08	12.3979
NUMBL	-0.497369	4.57887	-6.3462	4.93643e-10	2.52707e-08	12.3942
RP11-79H23.3	1.13228	-1.54111	6.34611	4.93905e-10	2.52707e-08	12.3937
KLRD1	1.09894	0.752411	6.34304	5.03101e-10	2.56642e-08	12.3759
NAPA	0.33389	6.24109	6.3276	5.51989e-10	2.8074e-08	12.2865
PARP15	0.978263	-0.0783403	6.32043	5.7624e-10	2.92202e-08	12.245
BTN3A2	0.690675	5.37918	6.31813	5.84232e-10	2.95375e-08	12.2318
PTPRN	-1.37058	-0.647284	-6.31107	6.09454e-10	3.07216e-08	12.191
RCSD1	0.813399	2.80693	6.29163	6.84597e-10	3.44076e-08	12.0789
SPN	0.962174	2.79706	6.28866	6.96848e-10	3.49203e-08	12.0618
PCAT6	-0.78439	1.84383	-6.27926	7.37041e-10	3.68261e-08	12.0078
CD28	0.969816	0.891648	6.2783	7.41291e-10	3.69302e-08	12.0023
CFB	0.942973	3.07688	6.27613	7.50922e-10	3.73009e-08	11.9898
CD209	1.00897	2.15414	6.25799	8.36578e-10	4.14349e-08	11.8857
TYMP	0.717311	8.47109	6.25086	8.72747e-10	4.29943e-08	11.8449
SP100	0.437623	6.13672	6.25079	8.73109e-10	4.29943e-08	11.8445
ARHGAP30	0.657591	4.32356	6.24974	8.78581e-10	4.31391e-08	11.8385
SLC15A3	0.754187	5.23933	6.23853	9.39031e-10	4.59747e-08	11.7744
TNFRSF14	0.623765	4.68261	6.23733	9.45758e-10	4.61714e-08	11.7675
PLD4	0.97888	0.771462	6.22629	1.00969e-09	4.91517e-08	11.7045
IL2RG	0.910537	4.32255	6.20085	1.17359e-09	5.69677e-08	11.5596
SELPLG	0.727441	3.92845	6.19285	1.23027e-09	5.95492e-08	11.5141
AIF1	0.777874	3.55378	6.18966	1.25364e-09	6.05086e-08	11.496
C1orf162	0.675099	2.3535	6.18117	1.31789e-09	6.34298e-08	11.4479
PIANP	-1.23203	-1.27768	-6.17123	1.3973e-09	6.70624e-08	11.3915
ZC3H12D	0.817712	0.597017	6.16913	1.41465e-09	6.77046e-08	11.3796
MS4A7	0.831432	3.06177	6.16558	1.44447e-09	6.89382e-08	11.3595
CYTIP	0.810854	2.86103	6.16231	1.47247e-09	7.00603e-08	11.3411
SLC40A1	0.903532	4.70514	6.16154	1.47917e-09	7.00603e-08	11.3367
AKAP5	0.754537	0.710269	6.1614	1.48032e-09	7.00603e-08	11.3359
CALCOCO2	0.288292	6.44843	6.14691	1.61167e-09	7.60653e-08	11.2541
PRKCB	0.91656	2.1536	6.14392	1.64014e-09	7.71952e-08	11.2372
IL2RA	0.862083	2.33101	6.13676	1.71042e-09	8.02813e-08	11.1968
ITM2A	0.828367	2.39211	6.13408	1.73748e-09	8.13275e-08	11.1817
TNFRSF1B	0.733766	5.13358	6.12861	1.7939e-09	8.36287e-08	11.1509
CH507-513H4.1	0.719896	-1.64854	6.12837	1.79646e-09	8.36287e-08	11.1496
TNFSF8	1.02243	-0.505116	6.12001	1.88633e-09	8.75732e-08	11.1026
MLKL	0.470396	3.8706	6.09975	2.12297e-09	9.8291e-08	10.9888
IGJ	1.52773	4.82902	6.08813	2.27138e-09	1.04877e-07	10.9238
PHF11	0.403702	4.30172	6.08704	2.28594e-09	1.05265e-07	10.9176
C11orf21	1.01319	-1.2724	6.08257	2.34608e-09	1.0747e-07	10.8926
RP11-876N24.3	0.892847	0.345686	6.08254	2.34644e-09	1.0747e-07	10.8925
RP11-284N8.3	1.17465	-0.729491	6.06125	2.65496e-09	1.21274e-07	10.7736
SHISA5	0.361438	7.64384	6.05255	2.79222e-09	1.27203e-07	10.7251
IFI16	0.428378	7.95679	6.04412	2.93161e-09	1.33197e-07	10.6782
CARD17	1.15557	-0.642741	6.04021	2.99871e-09	1.35883e-07	10.6564
CDC42SE2	0.380981	5.46335	6.0397	3.00757e-09	1.35923e-07	10.6536
XAF1	0.99114	3.64074	6.02195	3.3318e-09	1.50178e-07	10.5551
ENO2	-0.878998	4.8571	-6.00857	3.59867e-09	1.61779e-07	10.481
ADORA3	0.760212	1.14147	6.00588	3.65475e-09	1.63868e-07	10.4661
DOCK2	0.902315	3.31866	6.00087	3.76158e-09	1.68214e-07	10.4384
ISG15	1.05674	7.1725	5.99429	3.90649e-09	1.74238e-07	10.402
NCKAP1L	0.863127	3.90797	5.9849	4.12273e-09	1.83402e-07	10.3502
APBB1IP	0.840977	2.3543	5.98172	4.19853e-09	1.86288e-07	10.3327
NCF1B	0.820503	-0.941735	5.98117	4.2119e-09	1.86396e-07	10.3296
FCGR3A	0.961153	4.56794	5.97153	4.45082e-09	1.96079e-07	10.2766
GNLY	1.11187	3.52416	5.97142	4.45371e-09	1.96079e-07	10.2759
CTSS	0.827952	5.58936	5.96734	4.55887e-09	2.00191e-07	10.2535
TRAF3IP3	0.695007	2.17706	5.95994	4.75606e-09	2.08313e-07	10.2128
CCDC125	0.459589	2.79808	5.95177	4.98308e-09	2.17697e-07	10.1679
IRF7	0.710992	5.56025	5.94709	5.11809e-09	2.23023e-07	10.1422
PARP12	0.439045	6.10841	5.9435	5.22382e-09	2.27049e-07	10.1226
ICAM3	0.940013	0.366662	5.94077	5.30591e-09	2.30031e-07	10.1076
NT5C3A	0.385632	4.93538	5.93759	5.40291e-09	2.33642e-07	10.0902
BLNK	0.797723	3.44642	5.9161	6.10532e-09	2.63348e-07	9.97269
HLA-DRB6	1.12272	3.78297	5.91223	6.24104e-09	2.68522e-07	9.95155
SLAMF9	-1.21617	-0.506613	-5.90791	6.39595e-09	2.74494e-07	9.92799
RUFY4	1.13095	-0.741693	5.90661	6.4431e-09	2.75823e-07	9.92093
CYTH4	0.735977	3.39798	5.90542	6.48675e-09	2.76995e-07	9.91444
RP11-42I10.1	-0.721682	-1.12121	-5.89691	6.80755e-09	2.89968e-07	9.86805
MS4A1	1.54901	-0.583755	5.89486	6.88691e-09	2.92616e-07	9.85691
AC009950.2	0.669946	-0.337587	5.89071	7.05059e-09	2.98509e-07	9.83433
C4orf33	0.458004	2.82729	5.89046	7.06064e-09	2.98509e-07	9.83296
FPR3	0.865927	3.63737	5.88007	7.48825e-09	3.15804e-07	9.77646
LILRB2	0.857097	2.55783	5.87834	7.56157e-09	3.18109e-07	9.7671
ID2	0.662923	4.32343	5.87666	7.63359e-09	3.20348e-07	9.75799
CCR7	0.967413	1.86898	5.8754	7.68844e-09	3.21856e-07	9.75111
FAS	0.63312	3.98912	5.87282	7.80098e-09	3.25767e-07	9.73715
C19orf66	0.450445	4.61835	5.86231	8.27778e-09	3.44833e-07	9.68015
SLC22A17	-0.785904	2.6422	-5.85611	8.5722e-09	3.56227e-07	9.64657
USP15	0.303398	5.8887	5.85007	8.86866e-09	3.6765e-07	9.61391
DNAJA1	0.416472	7.35826	5.84291	9.23314e-09	3.81831e-07	9.57521
ANKRD44	0.696128	2.45593	5.83313	9.7543e-09	4.02406e-07	9.52247
SPP1	-1.39069	6.06927	-5.82752	1.00664e-08	4.13369e-07	9.49221
AMICA1	0.825162	2.88909	5.82748	1.00686e-08	4.13369e-07	9.49201
KIF3C	-0.594005	4.24123	-5.82668	1.01141e-08	4.14241e-07	9.48768
AC116366.6	0.79767	-0.841301	5.82493	1.02137e-08	4.17317e-07	9.47826
CTA-384D8.36	0.709844	2.92148	5.82303	1.03232e-08	4.20782e-07	9.46802
CYSLTR1	0.82549	0.225106	5.82136	1.04201e-08	4.23719e-07	9.45905
ST8SIA4	0.665176	2.79171	5.79152	1.23133e-08	4.99508e-07	9.29873
CNIH3	-0.732705	0.853216	-5.78284	1.29243e-08	5.23051e-07	9.25223
TMEM59L	-1.03851	-1.58319	-5.77881	1.32177e-08	5.33655e-07	9.23068
HLA-DOB	0.675013	1.60434	5.77325	1.36334e-08	5.49138e-07	9.20095
GAB3	0.685686	1.1338	5.7666	1.41474e-08	5.68499e-07	9.16542
CNOT6	0.346141	5.55897	5.74305	1.61235e-08	6.46384e-07	9.03992
IFI6	1.01031	7.86632	5.73746	1.66307e-08	6.63842e-07	9.01019
AOAH	0.952634	2.23952	5.73739	1.6637e-08	6.63842e-07	9.00983
PARP8	0.555041	3.96296	5.73395	1.69574e-08	6.75046e-07	8.99152
CD79B	0.83303	1.04773	5.72675	1.76468e-08	7.00853e-07	8.95328
TRIM5	0.48656	4.35837	5.72454	1.78634e-08	7.07807e-07	8.94157
SLC35A4	0.269892	6.45582	5.72058	1.82584e-08	7.20484e-07	8.92058
MAT2B	0.37428	5.90388	5.72049	1.82679e-08	7.20484e-07	8.92008
LCK	0.756122	3.03194	5.71336	1.90011e-08	7.47668e-07	8.88233
C6orf62	0.307687	7.25764	5.71088	1.92631e-08	7.56234e-07	8.86918
LRMP	0.916684	1.3439	5.71017	1.93393e-08	7.574e-07	8.86539
HLA-DQB1-AS1	1.07408	-1.39031	5.70977	1.93818e-08	7.574e-07	8.86329
SCG5	-0.823902	1.16069	-5.70672	1.97105e-08	7.68484e-07	8.84715
ANKHD1-EIF4EBP3	0.404225	1.51732	5.70453	1.99496e-08	7.76031e-07	8.83558
RAB37	0.713247	0.249226	5.69677	2.08219e-08	8.08119e-07	8.79452
CD53	0.794734	4.26032	5.68773	2.18834e-08	8.47385e-07	8.74682
CECR1	0.881337	4.45865	5.68205	2.25775e-08	8.72281e-07	8.71687
CASP4	0.510289	5.93323	5.68034	2.27903e-08	8.78508e-07	8.70787
CYSLTR2	0.829329	0.111709	5.67479	2.34961e-08	9.00616e-07	8.67862
SIGLEC1	0.928689	3.00379	5.67472	2.35045e-08	9.00616e-07	8.67827
IL15	0.746963	2.21835	5.67458	2.35224e-08	9.00616e-07	8.67754
PRR36	-1.06462	-0.305336	-5.66963	2.4171e-08	9.23375e-07	8.65145
HELZ2	0.576722	6.604	5.66614	2.46379e-08	9.39108e-07	8.6331
CD80	0.784521	0.047032	5.65114	2.67469e-08	1.01722e-06	8.55433
RP11-134L10.1	0.548276	-0.918728	5.64866	2.71113e-08	1.02878e-06	8.54135
PPP1R3G	-0.776032	1.27146	-5.63977	2.84613e-08	1.07761e-06	8.49476
P3H4	-0.573384	4.79249	-5.63311	2.95142e-08	1.115e-06	8.45992
GAPT	0.914948	-1.08509	5.6229	3.12046e-08	1.17625e-06	8.40653
DNM1	-0.777578	3.7145	-5.61357	3.2831e-08	1.23482e-06	8.35782
P3H3	-0.81915	4.06038	-5.61058	3.33689e-08	1.25229e-06	8.34224
RP11-693N9.2	0.678899	-0.312236	5.59995	3.53527e-08	1.32382e-06	8.28688
TLR8	1.01431	0.62912	5.59895	3.55453e-08	1.32811e-06	8.28167
DENND2D	0.410465	4.60255	5.59737	3.58508e-08	1.3366e-06	8.27347
DNASE1L3	0.987552	1.81647	5.58858	3.76017e-08	1.39881e-06	8.22777
RGS1	0.79846	4.79734	5.58646	3.80355e-08	1.41187e-06	8.21677
GPRIN3	0.743883	2.64413	5.58513	3.83101e-08	1.41897e-06	8.20988
WDFY4	0.956526	2.3524	5.58389	3.85696e-08	1.42549e-06	8.20341
KLHL36	-0.327688	5.33405	-5.58222	3.89185e-08	1.43527e-06	8.19478
RASGRP1	0.829789	2.9665	5.57738	3.99519e-08	1.4702e-06	8.16967
RP11-274E7.2	0.617756	-0.333324	5.57371	4.07528e-08	1.49644e-06	8.15064
PIK3R5	0.687404	2.42839	5.56905	4.17928e-08	1.53133e-06	8.1265
NUBP1	0.282787	3.81478	5.55624	4.47854e-08	1.63745e-06	8.06023
CHMP5	0.364647	6.14237	5.55263	4.56664e-08	1.66609e-06	8.04157
IGLV3-1	1.62728	2.03376	5.54851	4.66915e-08	1.69985e-06	8.0203
PPM1K	0.553245	3.2359	5.54523	4.75236e-08	1.72646e-06	8.00337
SUSD3	0.729877	1.26224	5.544	4.78409e-08	1.73428e-06	7.997
RP11-389C8.2	0.609373	0.71716	5.54101	4.86149e-08	1.75806e-06	7.98163
ATP8B4	0.64093	0.732767	5.54068	4.87033e-08	1.75806e-06	7.97989
IGHV1-46	1.68118	1.83306	5.53787	4.9444e-08	1.78103e-06	7.96543
CX3CR1	0.972859	-0.190318	5.53216	5.0986e-08	1.8327e-06	7.93601
IGKV1-5	1.57081	4.1119	5.53081	5.13573e-08	1.84216e-06	7.92906
MAST1	-0.939168	-0.122017	-5.52989	5.16121e-08	1.84741e-06	7.92432
MAX	0.247614	6.06474	5.52792	5.21611e-08	1.86315e-06	7.91418
GGTA1P	0.741245	1.31139	5.52385	5.3313e-08	1.90031e-06	7.89326
SP140	0.860776	1.47685	5.51497	5.59153e-08	1.9889e-06	7.84762
CTSO	0.586067	4.1141	5.49943	6.07669e-08	2.15442e-06	7.76793
CD180	0.796234	1.1399	5.49926	6.08215e-08	2.15442e-06	7.76707
ZC3HAV1	0.334837	5.98122	5.49152	6.33898e-08	2.24074e-06	7.72747
RANBP6	0.452027	4.51842	5.48987	6.39518e-08	2.25592e-06	7.71902
FNBP1	0.419195	5.11308	5.47817	6.80705e-08	2.39625e-06	7.65926
CCR4	1.05139	0.458698	5.45012	7.90227e-08	2.77606e-06	7.51645
RAB27A	0.366791	4.48311	5.44622	8.06791e-08	2.82541e-06	7.49659
CD200R1	0.777717	-0.0249697	5.44603	8.07592e-08	2.82541e-06	7.49564
AC009303.2	-0.46072	-0.53517	-5.44359	8.18121e-08	2.85638e-06	7.48325
C9orf41	0.341111	4.3541	5.44074	8.30558e-08	2.89388e-06	7.46881
LGALS9	0.713274	4.97898	5.4401	8.33377e-08	2.89777e-06	7.46557
CD4	0.75987	4.90731	5.43386	8.61398e-08	2.9891e-06	7.43392
SCIMP	0.969401	0.321565	5.4327	8.66692e-08	3.00136e-06	7.42806
BTK	0.67914	1.80632	5.43137	8.72847e-08	3.01655e-06	7.42128
C3AR1	0.748969	2.75261	5.41867	9.33469e-08	3.21952e-06	7.35703
PDCD1LG2	0.814588	2.12311	5.41738	9.39843e-08	3.22985e-06	7.35052
CPEB3	0.496791	2.20753	5.4173	9.40254e-08	3.22985e-06	7.35011
IGKV4-1	1.57937	4.21421	5.41651	9.44142e-08	3.23668e-06	7.34616
HLA-H	0.621195	5.33522	5.41598	9.46792e-08	3.23924e-06	7.34348
TMEM156	0.763872	-0.397606	5.40744	9.90444e-08	3.3818e-06	7.30035
LY6E	0.599392	8.68063	5.40203	1.01912e-07	3.47277e-06	7.27304
MZB1	1.19083	2.66774	5.39822	1.03977e-07	3.53604e-06	7.25386
CMKLR1	0.77116	2.89433	5.39669	1.04817e-07	3.55298e-06	7.24617
NACAD	-0.76547	1.07386	-5.39656	1.04892e-07	3.55298e-06	7.24548
HAPLN3	0.550713	4.76573	5.39514	1.0568e-07	3.57256e-06	7.23832
CTB-152G17.6	-0.489667	-1.5653	-5.3926	1.07098e-07	3.61335e-06	7.22557
FCGR1A	0.863186	0.55547	5.39194	1.07473e-07	3.61884e-06	7.22222
C19orf38	0.660566	0.26725	5.38976	1.08711e-07	3.65328e-06	7.21128
CNP	0.250989	6.84442	5.38768	1.09907e-07	3.68622e-06	7.2008
ABCB1	0.761911	0.272247	5.38608	1.10835e-07	3.71003e-06	7.19277
SPNS3	0.738876	-1.39457	5.38039	1.14197e-07	3.81506e-06	7.16419
CPVL	0.717934	3.67066	5.37872	1.15205e-07	3.84122e-06	7.15578
GBP6	0.989709	5.96042	5.36922	1.21095e-07	4.02973e-06	7.10809
CCR1	0.805597	2.35358	5.36652	1.22819e-07	4.07912e-06	7.09458
IFITM3	0.544555	8.84845	5.3599	1.27148e-07	4.2147e-06	7.06145
LGALS2	0.753614	0.616065	5.35873	1.27935e-07	4.23255e-06	7.05555
ALPK1	0.375897	4.02936	5.35098	1.33227e-07	4.39906e-06	7.0168
CD79A	1.16664	1.9088	5.34922	1.3446e-07	4.42894e-06	7.00799
FAM46C	0.875583	3.26989	5.34894	1.34651e-07	4.42894e-06	7.00663
SLCO2B1	0.798061	4.26922	5.34749	1.35677e-07	4.45406e-06	6.99938
SLC29A4	-0.926246	1.71356	-5.34591	1.368e-07	4.4784e-06	6.9915
C10orf54	0.449485	6.10159	5.34571	1.36944e-07	4.4784e-06	6.99049
CSF1	0.583234	4.966	5.34352	1.38523e-07	4.52138e-06	6.97953
HAVCR2	0.708075	3.16672	5.34102	1.4034e-07	4.5719e-06	6.96708
TNFRSF10D	-0.761273	2.67751	-5.33928	1.41624e-07	4.59997e-06	6.95837
TFEC	0.851299	1.04049	5.33912	1.41741e-07	4.59997e-06	6.95758
ACKR4	0.935775	0.348379	5.33659	1.43621e-07	4.65212e-06	6.94498
PNPLA3	-0.969163	-0.330692	-5.33598	1.44083e-07	4.65822e-06	6.94191
IGLV3-19	1.61472	2.59448	5.32785	1.50314e-07	4.85048e-06	6.90144
HCST	0.738555	1.285	5.32446	1.52993e-07	4.92759e-06	6.88456
IGHV3-15	1.63388	2.09726	5.3198	1.56752e-07	5.03914e-06	6.86135
SLC25A46	0.290438	5.23219	5.31465	1.61002e-07	5.16602e-06	6.83579
RPL17P50	-0.545034	-1.07762	-5.3135	1.61967e-07	5.18721e-06	6.83008
IGHV1-18	1.64302	2.75901	5.31275	1.62604e-07	5.19785e-06	6.82632
CASP1P2	0.980602	-0.416105	5.30772	1.6691e-07	5.32549e-06	6.80135
IGFLR1	0.589266	0.275829	5.30576	1.68614e-07	5.36979e-06	6.79164
C2	0.616278	3.8205	5.3028	1.71226e-07	5.4428e-06	6.77695
LGALS3BP	0.423118	9.37383	5.3002	1.7355e-07	5.50641e-06	6.76407
IGKV1-16	1.64122	0.895856	5.29222	1.80879e-07	5.72828e-06	6.72455
DPYD	0.700795	4.76448	5.28385	1.8889e-07	5.97089e-06	6.68314
SPIB	1.25205	-0.204972	5.28021	1.92481e-07	6.07312e-06	6.66515
RP11-876N24.4	0.576995	-0.693386	5.27514	1.97592e-07	6.22287e-06	6.64012
IL18R1	0.642027	1.75747	5.27371	1.99059e-07	6.25749e-06	6.63305
IGLL5	1.47756	3.76228	5.27209	2.00726e-07	6.28487e-06	6.62508
IGSF6	0.699035	2.6371	5.27187	2.00954e-07	6.28487e-06	6.624
SCO2	0.456018	5.00517	5.27179	2.01036e-07	6.28487e-06	6.62361
RASGRP4	0.588881	0.182286	5.27044	2.02441e-07	6.3172e-06	6.61695
XRN1	0.44165	5.64885	5.26413	2.09141e-07	6.51434e-06	6.58585
MSL3	0.257338	4.63743	5.26048	2.13112e-07	6.6259e-06	6.56789
SERPINB9	0.614786	4.25971	5.23987	2.36965e-07	7.35411e-06	6.46657
GBP3	0.755551	4.51814	5.23754	2.39812e-07	7.42894e-06	6.45516
FAM65B	0.761913	1.94191	5.23065	2.4844e-07	7.68226e-06	6.42141
RGL4	0.609843	-0.81608	5.22679	2.53412e-07	7.82181e-06	6.40249
CLEC2B	0.700602	4.4263	5.22537	2.55262e-07	7.86466e-06	6.39555
MYO1F	0.627864	3.75964	5.22219	2.59458e-07	7.97952e-06	6.37998
SPOCK2	0.810935	4.38035	5.22128	2.60672e-07	7.99337e-06	6.37553
CCR8	1.04436	-0.997118	5.22115	2.60847e-07	7.99337e-06	6.37489
DCTN4	0.291685	5.87357	5.21546	2.68552e-07	8.21471e-06	6.34709
LST1	0.645648	2.47939	5.21265	2.72447e-07	8.31892e-06	6.33335
BAK1	0.382799	5.87108	5.20123	2.8882e-07	8.80307e-06	6.27764
CDR2L	-0.54515	4.4441	-5.19955	2.91303e-07	8.86291e-06	6.26947
NT5DC2	-0.453057	5.65314	-5.19724	2.94758e-07	8.95204e-06	6.25822
ECEL1	1.0688	-0.961566	5.19121	3.03964e-07	9.21518e-06	6.22887
CD86	0.565559	3.25241	5.19019	3.0555e-07	9.24683e-06	6.2239
MYD88	0.349176	6.07246	5.18862	3.08e-07	9.29067e-06	6.21628
S100B	0.753582	2.22449	5.18856	3.0809e-07	9.29067e-06	6.216
NMB	-0.691052	3.2429	-5.18502	3.13703e-07	9.44324e-06	6.19877
RAB33A	0.547706	-0.478466	5.18437	3.14746e-07	9.45793e-06	6.1956
IFI30	0.531812	0.0121821	5.18218	3.18262e-07	9.54675e-06	6.185
EVI2A	0.68297	1.84104	5.17858	3.24149e-07	9.70625e-06	6.16751
VPS37D	-0.874024	-0.329178	-5.17653	3.27545e-07	9.79073e-06	6.15757
SIGLEC12	1.11335	-0.240674	5.17506	3.30005e-07	9.84699e-06	6.15043
PTPN7	0.767444	3.02388	5.16924	3.39908e-07	1.01247e-05	6.12222
CILP2	-1.0813	0.728787	-5.16528	3.46812e-07	1.03098e-05	6.10304
CD300A	0.633224	2.65638	5.16499	3.47332e-07	1.03098e-05	6.1016
DOCK10	0.682803	3.29838	5.16436	3.48442e-07	1.03248e-05	6.09856
AC006262.5	-1.40655	0.938571	-5.15481	3.65733e-07	1.08183e-05	6.05236
CYLD	0.333097	5.82184	5.15113	3.72616e-07	1.10028e-05	6.03457
IGHV3-21	1.61048	1.919	5.14858	3.77464e-07	1.11267e-05	6.02224
RASL10B	-0.800235	-0.290328	-5.14483	3.84697e-07	1.13203e-05	6.00414
IGHV3-53	1.50943	0.00229444	5.14327	3.87732e-07	1.139e-05	5.99664
LILRB1	0.753124	1.82668	5.12179	4.32158e-07	1.26732e-05	5.89319
C3orf62	0.356334	2.79944	5.11975	4.36623e-07	1.27821e-05	5.88339
IGLV1-44	1.54707	2.57692	5.11709	4.42505e-07	1.29321e-05	5.87063
IGLC3	1.34519	4.77133	5.11645	4.43944e-07	1.29519e-05	5.86753
EXOC3L4	1.19592	0.164818	5.11514	4.46889e-07	1.30155e-05	5.86123
RP11-876N24.5	0.520576	-0.340708	5.11346	4.5068e-07	1.31035e-05	5.85317
GAN	-0.496129	4.54636	-5.10347	4.73906e-07	1.37554e-05	5.80526
CCR2	0.978942	-0.0100089	5.09863	4.85569e-07	1.40699e-05	5.78209
RP5-1120P11.1	-0.873498	-0.499719	-5.09293	4.99655e-07	1.44535e-05	5.75483
CLEC4A	0.607123	0.994903	5.09055	5.05646e-07	1.4602e-05	5.74347
ABCC6	-0.611822	0.0492155	-5.07002	5.60401e-07	1.61558e-05	5.64548
IGHV3-74	1.49058	1.62161	5.06738	5.67835e-07	1.63425e-05	5.63292
MB21D1	0.510522	4.34594	5.06482	5.75146e-07	1.6525e-05	5.62073
FCER1G	0.643284	4.13511	5.06216	5.82821e-07	1.67174e-05	5.6081
RCOR2	-0.889765	1.15049	-5.06024	5.88442e-07	1.68502e-05	5.59895
GLIS2	-0.560485	4.18823	-5.05848	5.93629e-07	1.696e-05	5.59059
STX12	0.23918	5.45365	5.05826	5.94266e-07	1.696e-05	5.58957
RAB39B	0.832767	-1.34661	5.05692	5.98275e-07	1.70458e-05	5.58316
TMEM158	-0.694504	2.96542	-5.04652	6.30077e-07	1.7922e-05	5.53382
TMEM140	0.434116	4.02013	5.0437	6.39003e-07	1.81456e-05	5.52042
IGLV2-23	1.50614	2.98651	5.03863	6.55303e-07	1.85774e-05	5.49643
GPR183	0.656739	2.9755	5.03733	6.59557e-07	1.86425e-05	5.49026
VKORC1	-0.348555	4.51783	-5.03726	6.59785e-07	1.86425e-05	5.48993
CD47	0.385592	7.24742	5.03133	6.79508e-07	1.9168e-05	5.46188
IRS2	-0.614439	4.03157	-5.02938	6.8612e-07	1.93225e-05	5.45265
INSIG2	-0.276413	4.20781	-5.02876	6.88228e-07	1.93499e-05	5.44973
NCF1	0.671428	1.07617	5.02571	6.98738e-07	1.9613e-05	5.4353
FLJ31356	-0.683188	-1.51838	-5.02168	7.12841e-07	1.9976e-05	5.41627
OPTN	0.339921	6.84058	5.02026	7.17869e-07	2.00838e-05	5.40957
IGHV3-30	1.44485	2.19844	5.01836	7.24667e-07	2.02408e-05	5.4006
SLC39A4	-0.489939	4.76387	-5.01033	7.54055e-07	2.10272e-05	5.36274
CLIC2	0.610535	2.89375	5.0065	7.68503e-07	2.1395e-05	5.34467
TYRO3	-0.393866	4.41936	-5.00455	7.75924e-07	2.15664e-05	5.33552
MIR155HG	0.729257	-0.65321	4.99679	8.06274e-07	2.23396e-05	5.29899
PSMA5	0.266651	6.66885	4.99668	8.06707e-07	2.23396e-05	5.29848
NCOA7	0.483026	5.9257	4.99643	8.07678e-07	2.23396e-05	5.29733
PREX1	0.573141	4.50872	4.98888	8.38333e-07	2.315e-05	5.26187
STAB1	0.546845	5.21403	4.98616	8.49648e-07	2.34244e-05	5.24911
IGHV2-26	1.59623	-0.393566	4.98383	8.59491e-07	2.36575e-05	5.23815
RGS14	0.457254	4.61332	4.98141	8.69775e-07	2.3902e-05	5.22682
MAP4K2	-0.343412	4.5938	-4.97727	8.87682e-07	2.43548e-05	5.20743
CSF2RA	0.312961	-1.7614	4.97577	8.94253e-07	2.44956e-05	5.20041
CTF1	-0.732966	1.58665	-4.96983	9.20753e-07	2.5181e-05	5.17261
TNIP3	0.927855	0.718738	4.96821	9.28113e-07	2.53417e-05	5.16504
CCL4L1	0.863775	1.20518	4.95179	1.006e-06	2.74244e-05	5.08835
RAB6B	-0.911038	2.23378	-4.94944	1.01768e-06	2.76984e-05	5.07738
RP3-395M20.8	0.650143	-0.0636884	4.94115	1.0598e-06	2.87987e-05	5.03879
LAIR1	0.711104	3.36153	4.93682	1.08248e-06	2.93683e-05	5.01865
SAMD9	0.72795	6.99252	4.93498	1.09227e-06	2.95869e-05	5.01008
SCARF2	-0.677869	2.72819	-4.93287	1.10356e-06	2.98453e-05	5.0003
TAPBP	0.350231	8.31895	4.93176	1.10958e-06	2.99604e-05	4.99513
IL16	0.626922	3.06274	4.9288	1.12574e-06	3.03486e-05	4.98137
CFP	0.664439	0.506321	4.91721	1.19116e-06	3.20616e-05	4.92765
GFRA2	0.739495	-0.545202	4.91401	1.2099e-06	3.25145e-05	4.91281
MILR1	0.670906	0.415315	4.90526	1.26251e-06	3.3875e-05	4.87233
GLDC	1.22112	1.26444	4.90415	1.26932e-06	3.40043e-05	4.86721
IGLV3-25	1.46758	2.73622	4.90278	1.27779e-06	3.41772e-05	4.86089
MLLT11	-0.738546	3.38155	-4.90022	1.29381e-06	3.4547e-05	4.84905
IGLV7-43	1.4567	-0.319115	4.89992	1.29566e-06	3.4547e-05	4.84768
KIAA0125	1.05671	-0.75893	4.89638	1.31813e-06	3.50912e-05	4.83134
STX11	0.620113	2.81757	4.89516	1.32595e-06	3.52442e-05	4.82571
LCP1	0.697996	6.46078	4.89423	1.33196e-06	3.53489e-05	4.82141
ARHGAP20	0.805901	-0.0870931	4.89051	1.35619e-06	3.59358e-05	4.80428
SLC9A5	-0.517045	0.290292	-4.88711	1.37874e-06	3.64767e-05	4.7886
GPR35	0.527848	0.332992	4.883	1.40647e-06	3.71526e-05	4.76967
SERPING1	0.648035	7.14267	4.88047	1.42384e-06	3.75533e-05	4.758
KIAA0922	0.329265	4.7816	4.87777	1.44254e-06	3.79875e-05	4.7456
FKBP10	-0.768835	5.86178	-4.87498	1.46214e-06	3.84444e-05	4.73277
GSTK1	0.304024	6.31427	4.87399	1.46914e-06	3.85689e-05	4.72824
ODF2L	0.343521	4.47914	4.87352	1.4725e-06	3.85975e-05	4.72607
HIC2	-0.443341	2.87725	-4.86413	1.54083e-06	4.03268e-05	4.68295
SUCNR1	0.773908	0.147448	4.86102	1.56415e-06	4.08743e-05	4.66868
MYL9	-0.657718	6.17258	-4.85848	1.58341e-06	4.13141e-05	4.65705
CARD6	0.582715	4.21287	4.85677	1.59655e-06	4.15934e-05	4.6492
FAM78A	0.568118	2.54816	4.85031	1.64701e-06	4.28086e-05	4.61963
2019-03-01	0.527512	2.63089	4.85016	1.64822e-06	4.28086e-05	4.61893
SERPINB9P1	0.727135	-0.297943	4.84898	1.65762e-06	4.29871e-05	4.61353
N4BP2L1	0.581395	2.02463	4.84361	1.70099e-06	4.40448e-05	4.58899
PIK3CG	0.841017	1.12294	4.83926	1.7369e-06	4.49063e-05	4.56915
FAM171A2	-0.57209	1.21422	-4.838	1.74751e-06	4.51122e-05	4.56336
ARHGEF6	0.630552	3.13666	4.83739	1.75263e-06	4.51759e-05	4.56059
CYBB	0.788235	4.44482	4.83707	1.75529e-06	4.51761e-05	4.55915
CRMP1	-0.617597	3.59035	-4.82513	1.85886e-06	4.77696e-05	4.50469
ACAP1	0.475428	3.34384	4.82143	1.8921e-06	4.85506e-05	4.48786
PDGFB	-0.491506	4.24036	-4.81801	1.92335e-06	4.92781e-05	4.4723
STAMBPL1	0.512243	2.11634	4.81468	1.95429e-06	4.99957e-05	4.45715
IFI27	0.71495	9.06553	4.81155	1.98374e-06	5.06662e-05	4.44294
IFNGR1	0.342997	7.02265	4.81126	1.98644e-06	5.06662e-05	4.44165
NME4	-0.493733	5.13202	-4.80969	2.00151e-06	5.09741e-05	4.43447
MATN3	-0.807942	0.903907	-4.80796	2.01811e-06	5.13203e-05	4.42663
SLFN5	0.494934	6.36512	4.80749	2.02265e-06	5.13589e-05	4.4245
HS1BP3	-0.240925	4.95112	-4.80283	2.06815e-06	5.24361e-05	4.40338
GMFG	0.512543	3.1643	4.79661	2.13049e-06	5.39367e-05	4.37518
NYAP1	-0.849448	-0.962522	-4.79482	2.14877e-06	5.43185e-05	4.36707
IGKV1-17	1.4815	0.830461	4.79341	2.16326e-06	5.46039e-05	4.36069
RP1-30M3.5	0.392905	-0.710329	4.79178	2.18013e-06	5.49482e-05	4.35331
ERAP1	0.452631	6.00603	4.78323	2.27075e-06	5.71478e-05	4.31465
IGLV1-51	1.3184	2.90194	4.78101	2.29486e-06	5.76693e-05	4.30463
B4GALNT4	-1.11079	1.6611	-4.77746	2.33392e-06	5.85646e-05	4.28861
SLC2A1-AS1	-0.561802	0.147839	-4.77514	2.35984e-06	5.9128e-05	4.27813
CD37	0.661641	3.16875	4.77441	2.36806e-06	5.92468e-05	4.27483
FGD3	0.471811	3.40499	4.77389	2.37393e-06	5.93065e-05	4.27248
RAB27B	0.580241	4.84878	4.77191	2.39633e-06	5.97475e-05	4.26356
ADAM28	0.837347	2.16786	4.77171	2.3986e-06	5.97475e-05	4.26267
IGKC	1.27411	8.69283	4.76676	2.45565e-06	6.10794e-05	4.24036
ZMYND15	0.505756	1.21054	4.76473	2.47946e-06	6.15817e-05	4.2312
GLI2	-1.03059	2.34753	-4.76223	2.50902e-06	6.22252e-05	4.21996
RP5-1171I10.5	0.898467	-0.786485	4.75515	2.59454e-06	6.42526e-05	4.18816
BTN2A2	0.452733	3.29803	4.75449	2.60272e-06	6.43616e-05	4.18517
PLA2G7	0.660841	2.61038	4.7535	2.615e-06	6.45715e-05	4.1807
RLTPR	0.612712	1.18349	4.75209	2.63245e-06	6.49083e-05	4.17439
CTD-2547L24.3	0.502239	-0.458597	4.74545	2.71648e-06	6.68836e-05	4.14458
CD163L1	0.652665	1.57606	4.73805	2.81305e-06	6.91612e-05	4.11145
CCL19	1.14159	1.86272	4.73739	2.82195e-06	6.928e-05	4.10845
ZHX1	0.341086	5.43855	4.73366	2.87206e-06	7.04088e-05	4.09176
IGKV3-15	1.31753	2.77037	4.73138	2.90308e-06	7.10671e-05	4.08157
RCN3	-0.668031	4.75654	-4.72406	3.00498e-06	7.3456e-05	4.04885
IGLV2-14	1.39888	3.28005	4.72303	3.01955e-06	7.37064e-05	4.04426
HCCS	0.221733	4.78446	4.72261	3.02561e-06	7.37488e-05	4.04236
ALDOC	-0.675269	4.6746	-4.71866	3.08233e-06	7.49555e-05	4.02475
CASS4	0.647442	0.277858	4.71855	3.08392e-06	7.49555e-05	4.02426
SPI1	0.584856	3.99608	4.71809	3.09057e-06	7.50101e-05	4.02222
GPR113	0.455529	-0.900005	4.71753	3.09881e-06	7.50888e-05	4.01969
IGHV3-23	1.37252	3.35531	4.71727	3.10263e-06	7.50888e-05	4.01852
CD300LF	0.666898	0.858118	4.71038	3.20477e-06	7.74509e-05	3.98781
CNN1	-0.771668	2.27419	-4.70962	3.21621e-06	7.75194e-05	3.98443
IGLV2-8	1.44383	1.11597	4.70958	3.2167e-06	7.75194e-05	3.98429
PPP2CA	0.194724	7.21488	4.70841	3.23458e-06	7.78401e-05	3.97903
C9orf91	0.351599	4.33844	4.70718	3.25319e-06	7.81776e-05	3.97359
LILRA1	0.702084	-0.948439	4.70662	3.26185e-06	7.82752e-05	3.97107
SOCS7	-0.384512	4.46753	-4.69903	3.38014e-06	8.0965e-05	3.9373
SLC38A9	0.295668	3.45395	4.69882	3.38344e-06	8.0965e-05	3.93638
ADAMDEC1	1.10461	1.59479	4.6925	3.48511e-06	8.32808e-05	3.90831
YTHDC2	0.333685	4.715	4.68	3.69492e-06	8.81709e-05	3.85291
MARCO	-0.927109	1.42688	-4.67909	3.71072e-06	8.84242e-05	3.84886
ALDH9A1	0.301294	6.18048	4.67609	3.76314e-06	8.9548e-05	3.83557
PIM2	0.541202	4.41135	4.67538	3.77559e-06	8.97191e-05	3.83244
THBS3	-0.402487	4.06544	-4.67026	3.86691e-06	9.17611e-05	3.80979
CFDP1	-0.298054	5.28514	-4.66639	3.93731e-06	9.33017e-05	3.7927
GRIN3A	0.557642	-0.896999	4.66579	3.94827e-06	9.34314e-05	3.79007
SAR1B	0.22783	5.44479	4.66494	3.96396e-06	9.36725e-05	3.78631
IGHV5-51	1.45449	3.04531	4.65969	4.0622e-06	9.58611e-05	3.76312
TNFRSF9	0.674237	2.00999	4.65111	4.22751e-06	9.96026e-05	3.72533
RAB3B	-1.13489	1.31275	-4.65086	4.23244e-06	9.96026e-05	3.72422
BGN	-0.664784	8.35003	-4.65053	4.23904e-06	9.96204e-05	3.72275
CSF1R	0.645964	5.01884	4.65018	4.24584e-06	9.96426e-05	3.72123
ENPP1	-0.766423	1.50734	-4.64441	4.36127e-06	0.000102211	3.69582
ARHGEF25	-0.599942	2.51659	-4.64394	4.37078e-06	0.000102293	3.69376
CTD-2292M16.8	-0.537443	-0.648596	-4.64195	4.41139e-06	0.000103102	3.685
INPP5D	0.606951	3.96857	4.64108	4.42924e-06	0.000103377	3.68118
EIF2AK2	0.364352	6.57532	4.63998	4.45185e-06	0.000103763	3.67635
MEIS3	-0.637064	2.43062	-4.63732	4.50709e-06	0.000104907	3.66467
SHF	-0.56772	1.49697	-4.63651	4.52418e-06	0.000105161	3.66109
LYZ	0.95209	6.13657	4.63274	4.60377e-06	0.000106865	3.64457
CMTM4	-0.396347	4.69463	-4.63236	4.61191e-06	0.000106908	3.6429
RABGEF1	-0.25881	2.5118	-4.62568	4.75686e-06	0.000110119	3.6136
RARS	0.188891	6.15244	4.62499	4.772e-06	0.000110319	3.61059
FCGR2A	0.55925	4.47698	4.61883	4.90995e-06	0.000113355	3.58361
MICB	0.592823	2.89331	4.61818	4.92472e-06	0.000113542	3.58076
CSF2RB	0.661446	3.72917	4.61712	4.94889e-06	0.000113945	3.57613
IKZF2	0.65078	3.39655	4.61667	4.95906e-06	0.000114025	3.57419
CYP4V2	0.563932	2.75887	4.61632	4.96722e-06	0.000114059	3.57263
ADAR	0.275932	8.50507	4.61527	4.99136e-06	0.000114459	3.56804
C2orf81	-0.5454	1.82212	-4.61266	5.05178e-06	0.000115688	3.55665
MSRB1	0.37302	5.67523	4.61116	5.08705e-06	0.00011634	3.55006
IGKV3-11	1.26317	4.5406	4.60999	5.1145e-06	0.000116811	3.54497
CMTR1	0.245937	5.71647	4.60707	5.18382e-06	0.000118236	3.53223
RP5-1112D6.8	-0.395939	-0.487101	-4.60561	5.21893e-06	0.000118877	3.52584
IGLV4-69	1.41635	1.08121	4.60106	5.32935e-06	0.00012123	3.50602
KYNU	0.864809	4.30676	4.60065	5.33956e-06	0.000121301	3.50421
MPZL2	0.493072	7.11543	4.59952	5.36744e-06	0.000121772	3.49928
UCP2	0.594302	5.16924	4.58399	5.76469e-06	0.000130565	3.43171
IGHV3-49	1.41237	0.996157	4.58378	5.77036e-06	0.000130565	3.43078
CEACAM1	0.81225	3.73375	4.58306	5.78944e-06	0.000130823	3.42766
KDELR2	-0.226534	7.88988	-4.58273	5.79818e-06	0.000130847	3.42623
CCDC69	0.48963	4.18029	4.58021	5.86569e-06	0.000132195	3.41528
RP11-47L3.1	0.596445	-1.71648	4.57819	5.92019e-06	0.000133247	3.40653
STX17	0.339007	3.88672	4.57557	5.99197e-06	0.000134685	3.39513
IGKV1-9	1.40821	1.55396	4.57523	6.00128e-06	0.000134716	3.39366
HS3ST1	0.601649	3.19643	4.57439	6.0243e-06	0.000135055	3.39004
CNIH2	-0.677795	0.259574	-4.57074	6.12583e-06	0.000137151	3.37422
IGLV6-57	1.36534	2.17613	4.57037	6.1364e-06	0.000137207	3.37259
P4HA3	-0.734054	1.42191	-4.56819	6.19794e-06	0.000138352	3.36315
LTB	0.655552	2.56805	4.56798	6.20383e-06	0.000138352	3.36226
KCNG1	-0.988099	0.906316	-4.56449	6.30378e-06	0.000140397	3.34714
SCLT1	0.31499	3.24567	4.56092	6.40768e-06	0.000142525	3.33167
AQP3	0.967805	8.59606	4.55539	6.57164e-06	0.000145981	3.30778
YIPF1	0.181571	4.87227	4.54652	6.84322e-06	0.000151816	3.26948
VAV1	0.617408	2.71049	4.54352	6.93748e-06	0.000153707	3.25655
RPLP0P2	-0.621606	1.76928	-4.54234	6.97487e-06	0.000154335	3.25147
CTD-2521M24.9	0.584109	2.08914	4.5417	6.9951e-06	0.000154474	3.24873
BAI2	-0.66383	2.21602	-4.54157	6.9993e-06	0.000154474	3.24816
RFX5	0.349407	5.24348	4.53627	7.17029e-06	0.000158043	3.22534
IGLV2-11	1.36156	2.11591	4.53471	7.22147e-06	0.000158966	3.21862
ZNF74	-0.367226	3.54294	-4.53418	7.23879e-06	0.000159141	3.21635
ANKFY1	0.330678	5.95909	4.53251	7.29415e-06	0.000160152	3.20915
MYO7A	0.502281	2.74868	4.53184	7.31615e-06	0.000160428	3.2063
NDRG4	-0.824112	4.36564	-4.52701	7.47883e-06	0.000163667	3.18551
KAT2B	0.446403	3.71904	4.52688	7.48307e-06	0.000163667	3.18497
FLI1	0.48626	3.26182	4.52617	7.50715e-06	0.000163983	3.18194
PIK3R6	0.527293	0.437921	4.52549	7.53035e-06	0.000164279	3.17902
RASSF2	0.589851	3.54449	4.525	7.54718e-06	0.000164436	3.17691
VEGFB	-0.283451	5.78326	-4.51936	7.74314e-06	0.00016834	3.15268
MC1R	-0.436358	1.48359	-4.51927	7.74611e-06	0.00016834	3.15232
NAGK	0.274626	6.06658	4.51835	7.77877e-06	0.000168834	3.14834
XCR1	0.863478	0.082328	4.5172	7.81945e-06	0.000169381	3.14341
LOXL1-AS1	-0.600682	1.61867	-4.51707	7.82385e-06	0.000169381	3.14288
RAC3	-0.674926	3.28865	-4.51308	7.96689e-06	0.000172259	3.12576
RTN4RL2	-0.650304	0.372781	-4.51244	7.99006e-06	0.000172541	3.12302
FNDC4	-0.538078	1.87177	-4.50682	8.19579e-06	0.000176759	3.09899
COL10A1	-1.11566	3.49836	-4.50375	8.31059e-06	0.000179009	3.08585
TLR1	0.62478	2.25199	4.50331	8.32729e-06	0.000179142	3.08395
CAMK1G	-0.590217	-1.37416	-4.50186	8.38184e-06	0.000180088	3.07778
PLEK	0.708619	3.78761	4.49589	8.61107e-06	0.00018454	3.05229
GALT	0.356697	3.98463	4.49575	8.61681e-06	0.00018454	3.05166
C16orf54	0.74373	1.43081	4.49562	8.62152e-06	0.00018454	3.05114
PNCK	-1.20859	1.04315	-4.49002	8.84248e-06	0.000188602	3.02724
MEX3B	-0.635498	1.57371	-4.48998	8.84413e-06	0.000188602	3.02706
IL10	0.59128	-0.781384	4.48997	8.84451e-06	0.000188602	3.02702
ATP2A3	0.5195	4.57418	4.48955	8.8611e-06	0.000188719	3.02525
LY86	0.629641	0.946258	4.4885	8.90347e-06	0.00018915	3.02074
CD52	0.65192	3.17167	4.48849	8.90353e-06	0.00018915	3.02074
IGHV3-73	1.46453	-0.011054	4.48789	8.92792e-06	0.000189432	3.01815
AK3	0.345796	5.76693	4.48576	9.01401e-06	0.000191021	3.00909
C1S	0.510882	8.22688	4.48284	9.13337e-06	0.00019331	2.99666
LOXL2	-0.584412	5.8722	-4.48034	9.23674e-06	0.000195255	2.98603
GALNS	-0.350293	4.95138	-4.47173	9.60178e-06	0.00020272	2.94943
RP11-848P1.3	0.559147	-1.08763	4.46696	9.81021e-06	0.000206864	2.92915
TOR2A	0.26102	3.86891	4.46596	9.85435e-06	0.000207538	2.92491
IGHG1	1.22256	9.52793	4.45524	1.03399e-05	0.000217495	2.8795
STAT5A	0.394336	4.95663	4.45285	1.04511e-05	0.000219564	2.86939
NOTUM	-0.832058	0.356362	-4.45207	1.04881e-05	0.000220068	2.86606
NCF1C	0.571515	0.12615	4.45049	1.05625e-05	0.000221358	2.85938
IGHGP	1.18782	3.89379	4.44936	1.06159e-05	0.000222203	2.85463
GCSH	-0.328233	1.71848	-4.44597	1.07785e-05	0.00022508	2.84028
FERMT3	0.572095	3.98894	4.44568	1.07924e-05	0.00022508	2.83906
STC2	-0.627341	4.19497	-4.44567	1.07929e-05	0.00022508	2.83901
AIM1	0.408037	7.1054	4.44377	1.08852e-05	0.000226549	2.83098
IGLC2	1.13826	5.48871	4.44367	1.089e-05	0.000226549	2.83056
NOL3	-0.364774	4.54875	-4.44259	1.09424e-05	0.000227361	2.82604
GTF2B	0.194151	4.56057	4.44167	1.09875e-05	0.000228021	2.82215
MAP3K14	0.416641	4.04236	4.43937	1.11014e-05	0.000230105	2.81242
TXNIP	0.618579	7.60016	4.4375	1.11942e-05	0.000231466	2.80456
SRGN	0.551051	5.4115	4.4375	1.11943e-05	0.000231466	2.80456
GPR161	-0.489483	4.40517	-4.43453	1.13439e-05	0.000234277	2.79202
EFEMP2	-0.570579	4.38042	-4.43395	1.13735e-05	0.000234602	2.78957
MGAT4A	0.504721	3.15808	4.43301	1.1421e-05	0.000235298	2.78563
ODF3B	0.41555	4.19533	4.43097	1.15254e-05	0.000237067	2.77704
IGKV1-6	1.32713	0.78025	4.43079	1.15347e-05	0.000237067	2.77628
KCTD14	0.875285	0.904238	4.43016	1.15674e-05	0.000237453	2.77361
STAT4	0.544603	1.69572	4.42928	1.16127e-05	0.000238096	2.76992
IGHV4-39	1.40335	2.69447	4.42624	1.17716e-05	0.000241063	2.7571
BNIP3L	-0.301065	6.42204	-4.42591	1.17885e-05	0.00024112	2.75574
HMGN2P46	-0.349028	-1.15265	-4.42361	1.19101e-05	0.000243315	2.74606
CERK	-0.342346	5.42473	-4.41687	1.22734e-05	0.000250437	2.71771
VTI1A	0.16529	4.45947	4.4161	1.23151e-05	0.000250987	2.71451
IGLV3-9	1.37904	-0.147502	4.4158	1.23317e-05	0.000251025	2.71324
EPOR	-0.365387	1.41484	-4.40424	1.29818e-05	0.000263943	2.66478
2019-09-06	0.424771	4.38016	4.40381	1.30066e-05	0.000264132	2.66298
C11orf96	-0.622715	2.92779	-4.40284	1.30627e-05	0.000264955	2.65892
HAS1	-0.931894	-0.713976	-4.4018	1.31234e-05	0.000265869	2.65455
CLDN23	0.53379	1.40085	4.40011	1.32224e-05	0.000267558	2.64746
RFX8	-0.687323	-1.48755	-4.39401	1.35847e-05	0.000274263	2.62197
PAX8	-0.773486	1.8687	-4.39399	1.3586e-05	0.000274263	2.62188
FTH1P16	-0.43588	-0.798022	-4.39364	1.36068e-05	0.000274358	2.62044
LAT2	0.416136	2.81194	4.39149	1.37374e-05	0.000276665	2.61142
FKBP9	-0.347037	7.0459	-4.3912	1.37546e-05	0.000276683	2.61025
RP11-399O19.9	0.516211	-0.931939	4.39079	1.37797e-05	0.000276861	2.60853
BLZF1	0.264211	4.85402	4.38864	1.39119e-05	0.000279188	2.59953
IGHV3-11	1.34566	1.7244	4.38731	1.39937e-05	0.0002805	2.594
MOCOS	0.481961	4.32567	4.38345	1.42345e-05	0.000284991	2.57791
RNF167	0.206061	6.56244	4.37815	1.45722e-05	0.000291411	2.5558
IGLV1-40	1.30631	3.30166	4.37764	1.46051e-05	0.000291725	2.55368
CTD-2267D19.3	0.403302	2.82116	4.37683	1.46572e-05	0.000292424	2.55032
FAM105A	0.448198	2.39118	4.37577	1.47263e-05	0.0002934	2.54589
IGLV3-21	1.36185	3.77417	4.37555	1.47406e-05	0.0002934	2.54497
TMEM81	-0.30847	0.98559	-4.37434	1.48194e-05	0.000294625	2.53994
METRN	-0.516137	3.65071	-4.37348	1.48757e-05	0.000295398	2.53638
C5orf15	0.272588	5.70993	4.37297	1.49092e-05	0.00029572	2.53425
GS1-124K5.4	-0.548624	-0.568181	-4.37246	1.49433e-05	0.00029605	2.5321
PRDM4	0.214031	5.26292	4.37208	1.4968e-05	0.000296196	2.53054
IRF2	0.340478	5.16721	4.37161	1.49993e-05	0.000296405	2.52857
DOK3	0.465114	2.54802	4.3714	1.50134e-05	0.000296405	2.52769
IGHA1	1.25478	7.86734	4.37063	1.5064e-05	0.000296795	2.52452
FAM180A	-0.769474	-0.762144	-4.37057	1.50679e-05	0.000296795	2.52427
LPHN1	-0.546515	5.03535	-4.36974	1.51235e-05	0.000297545	2.5208
VAT1	-0.269177	7.05235	-4.36728	1.52886e-05	0.000300446	2.51057
SP140L	0.359968	4.23618	4.36665	1.5331e-05	0.000300932	2.50796
MAMSTR	-0.480688	1.30339	-4.36552	1.54074e-05	0.000302084	2.50327
IGLV1-47	1.30571	2.18278	4.36491	1.54491e-05	0.000302554	2.50072
ARID3A	-0.346205	3.66093	-4.3609	1.57239e-05	0.000307583	2.4841
BOLA3-AS1	-0.647354	-0.0955247	-4.35912	1.58482e-05	0.000309308	2.47669
FBXL5	0.254354	6.03815	4.35911	1.58485e-05	0.000309308	2.47667
C20orf195	-0.626263	-0.696624	-4.35482	1.61504e-05	0.00031484	2.45889
XXbac-BPG248L24.12	0.47858	0.960519	4.35242	1.63222e-05	0.000317826	2.44892
FCGR2C	0.675146	-0.21186	4.35143	1.63932e-05	0.000318844	2.44483
CABYR	-0.715988	1.1032	-4.35033	1.64728e-05	0.000320026	2.44026
SMARCA1	-0.596128	4.41933	-4.34806	1.66379e-05	0.000322867	2.43086
RASSF6	0.601987	2.38721	4.34293	1.70168e-05	0.000329844	2.40965
IGLV3-10	1.4245	0.862894	4.34194	1.70904e-05	0.000330893	2.40559
CD97	0.395012	5.55959	4.34097	1.71639e-05	0.000331939	2.40154
OGFR	0.274553	5.83831	4.33927	1.72918e-05	0.000334034	2.39455
VAV3	0.586133	4.9304	4.33491	1.76257e-05	0.000340072	2.37653
OLFM2	-0.612898	4.40145	-4.33461	1.76489e-05	0.000340072	2.37529
AMPD2	-0.236359	5.14986	-4.33441	1.76643e-05	0.000340072	2.37447
TOP1MT	-0.370675	5.53887	-4.33377	1.77141e-05	0.000340647	2.37182
FAM43B	-0.859454	-1.51533	-4.33188	1.78613e-05	0.000343091	2.36402
HPS6	0.205153	4.82424	4.3315	1.78911e-05	0.000343276	2.36245
PAPD4	0.223956	4.90916	4.32967	1.8035e-05	0.000345646	2.35491
PPAPDC2	0.345173	3.40738	4.3283	1.81432e-05	0.000347331	2.34927
TBXAS1	0.475153	2.80722	4.32499	1.84078e-05	0.000352	2.33564
TNFAIP8	0.287247	5.26597	4.32286	1.85802e-05	0.000354898	2.32686
RHOQ	-0.313616	4.90076	-4.32017	1.87996e-05	0.000358687	2.31581
PCYT1B	-1.19264	-0.791826	-4.31692	1.90685e-05	0.000363411	2.30243
SYT7	-0.71028	3.98565	-4.31602	1.91433e-05	0.000364428	2.29875
APOBEC3F	0.486732	2.49177	4.31496	1.92326e-05	0.00036572	2.29436
CBR3	0.541923	3.68862	4.31423	1.92933e-05	0.000366465	2.2914
CLIC5	0.820415	0.599521	4.31362	1.9345e-05	0.000367038	2.28888
IGHV1-2	1.3989	1.45321	4.31316	1.93841e-05	0.000367371	2.28697
RTN4R	-0.447682	3.1091	-4.31139	1.95342e-05	0.000369804	2.27971
SCUBE1	0.672058	-0.784419	4.309	1.97389e-05	0.000373072	2.2699
RP11-686O6.2	-0.507966	-0.591331	-4.30886	1.97506e-05	0.000373072	2.26934
SOX11	-0.842336	0.157755	-4.30777	1.98451e-05	0.000374346	2.26485
LRRC25	0.588178	1.81191	4.30757	1.9862e-05	0.000374346	2.26404
IGHG2	1.1739	7.16774	4.30671	1.99364e-05	0.000375333	2.26053
FTH1P23	-0.452995	-0.728066	-4.30519	2.0069e-05	0.000377412	2.25428
IGSF11	-1.16907	-0.327095	-4.30446	2.01332e-05	0.000378203	2.25128
TMEM176B	0.609922	4.69571	4.30208	2.03429e-05	0.00038172	2.24153
BAIAP3	-0.593865	1.52277	-4.29974	2.05507e-05	0.000385195	2.23196
FCRL5	1.06063	0.318331	4.2968	2.08154e-05	0.000389728	2.21991
IGHV3-48	1.26182	0.0542116	4.29648	2.08443e-05	0.00038984	2.21861
TGFB1I1	-0.423933	4.25529	-4.29612	2.08768e-05	0.000390021	2.21714
GLI1	-0.835029	0.904086	-4.29145	2.13057e-05	0.000397597	2.198
C9orf156	0.226462	3.37917	4.28994	2.14455e-05	0.000399543	2.19184
GBA2	0.330464	5.05488	4.28982	2.14568e-05	0.000399543	2.19134
CTD-2376I4.2	0.391618	-1.96708	4.28919	2.15157e-05	0.000400202	2.18877
PARP10	0.400663	5.96969	4.28838	2.15909e-05	0.000401134	2.18549
LYSMD2	0.330036	2.9935	4.28815	2.16129e-05	0.000401134	2.18452
GIN1	0.256794	1.93279	4.28633	2.1784e-05	0.00040387	2.1771
RAB14	0.195991	7.08472	4.28244	2.21549e-05	0.000410299	2.16122
EEF1A2	-1.24633	2.766	-4.2808	2.23131e-05	0.00041278	2.15452
PARVG	0.561434	2.64576	4.27793	2.25922e-05	0.000417489	2.14283
IGHV3-33	1.28138	1.27834	4.27732	2.26523e-05	0.000418147	2.14033
ATG4A	0.20761	3.68438	4.27431	2.2949e-05	0.000423166	2.12808
TNFRSF8	0.61125	0.693375	4.27164	2.32162e-05	0.000427631	2.11719
GDNF	-0.94213	-0.300008	-4.27026	2.33552e-05	0.000429359	2.11158
TMEM150B	0.629537	-0.386316	4.27021	2.33605e-05	0.000429359	2.11136
C1orf186	0.940759	1.47314	4.26922	2.34607e-05	0.000430736	2.10734
GPSM3	0.456005	3.74184	4.26851	2.35329e-05	0.000431597	2.10445
AGAP1	-0.351104	4.56207	-4.26784	2.36004e-05	0.00043237	2.10175
C5orf46	-0.993174	-1.14239	-4.26639	2.37489e-05	0.000434622	2.09585
SNAI3	0.484898	-0.0860293	4.2652	2.3872e-05	0.000436406	2.09099
CYP2J2	0.617919	1.79528	4.26275	2.41261e-05	0.000440579	2.08103
SMAP2	0.266066	5.36936	4.26197	2.42073e-05	0.000441589	2.07787
C12orf4	0.245102	4.14858	4.26007	2.44061e-05	0.00044474	2.07017
NRSN2-AS1	-0.36841	0.590718	-4.25898	2.45217e-05	0.000446368	2.06573
DUSP9	-0.855177	2.11728	-4.25787	2.46396e-05	0.000448037	2.06122
APMAP	-0.292755	6.76231	-4.25509	2.49369e-05	0.000452958	2.04994
PRKRA	-0.237138	5.08257	-4.25365	2.50919e-05	0.000454802	2.04411
IGHV1-24	1.34325	1.25711	4.25348	2.51106e-05	0.000454802	2.04341
TMEM191A	-0.408018	1.20225	-4.25341	2.51185e-05	0.000454802	2.04312
FMO2	1.11406	1.70459	4.25063	2.54211e-05	0.000459792	2.03186
HCLS1	0.552992	4.83889	4.24989	2.55022e-05	0.000460753	2.02886
C1R	0.403473	8.14155	4.24965	2.55283e-05	0.000460753	2.0279
CD14	0.514688	5.67204	4.24725	2.57937e-05	0.000465051	2.01817
EXOC1	0.194343	5.33652	4.24334	2.62318e-05	0.00047245	2.00234
MS4A4A	0.657012	2.22291	4.24264	2.63111e-05	0.000473377	1.9995
C4B	0.812288	0.357878	4.24156	2.64328e-05	0.000474961	1.99516
RIPK1	0.206114	5.43359	4.24137	2.64549e-05	0.000474961	1.99438
PIP4K2A	0.282231	4.57856	4.24092	2.65066e-05	0.000475389	1.99254
EDARADD	0.467096	3.23052	4.23942	2.66781e-05	0.000477962	1.98647
ATP8A1	0.622028	1.63971	4.23726	2.69268e-05	0.000481858	1.97775
SUN1	-0.277109	6.85099	-4.23704	2.69521e-05	0.000481858	1.97687
SMYD3	-0.235286	-1.74332	-4.23576	2.71003e-05	0.000483569	1.97171
SRP19	0.222044	4.10833	4.23573	2.71046e-05	0.000483569	1.97157
SOX12	-0.412537	4.59814	-4.23275	2.7453e-05	0.000489272	1.95956
MXRA8	-0.577476	5.13824	-4.22806	2.80121e-05	0.000498356	1.94061
SAA1	0.960875	4.27912	4.22798	2.80212e-05	0.000498356	1.9403
PSMD6	0.176552	5.77022	4.22733	2.80991e-05	0.000499221	1.93769
ZMIZ1-AS1	-0.564049	-1.11666	-4.22585	2.82782e-05	0.000501879	1.93172
AP000487.5	-0.645951	-0.766804	-4.22542	2.833e-05	0.000502175	1.93
PPA1	0.244857	7.04054	4.22523	2.83538e-05	0.000502175	1.92921
IGKV3-20	1.18478	4.45045	4.22491	2.8393e-05	0.000502348	1.92791
IGHV4-31	1.28097	0.693197	4.22376	2.85327e-05	0.000504294	1.9233
CFAP54	0.498652	-0.729154	4.2228	2.86511e-05	0.000505453	1.91941
TAGLN	-0.607159	6.21106	-4.22274	2.86576e-05	0.000505453	1.9192
CCNG1	0.29927	5.20625	4.22141	2.88222e-05	0.000507831	1.91381
CERKL	0.507867	1.79518	4.21558	2.95505e-05	0.000520125	1.89036
CASC15	-0.581262	1.39831	-4.21399	2.97522e-05	0.000523134	1.88397
SALL4	-0.788758	-0.616595	-4.2133	2.98401e-05	0.000524139	1.8812
HLA-DQB2	0.779688	3.7941	4.21117	3.0113e-05	0.000528389	1.87264
SAA2-SAA4	1.08086	-0.62621	4.20905	3.03868e-05	0.000532645	1.86414
FARP1	-0.605194	4.37565	-4.20706	3.06461e-05	0.000536229	1.85616
IGKV2-24	1.27825	0.111381	4.207	3.06542e-05	0.000536229	1.85591
PRELID1	0.232656	5.66434	4.20473	3.09529e-05	0.000540898	1.8468
PCGF5	0.32085	5.07266	4.20297	3.11864e-05	0.00054442	1.83974
WDFY1	0.298147	5.54617	4.20267	3.12269e-05	0.000544569	1.83852
ASAH2B	0.259091	1.27793	4.20085	3.147e-05	0.000548247	1.83123
RP11-305K5.1	-0.554558	-0.567917	-4.2001	3.15714e-05	0.000549452	1.82821
EXOSC3	0.30071	4.32462	4.19883	3.17429e-05	0.000551873	1.82312
FMNL1	0.455872	4.47042	4.19827	3.18181e-05	0.000552616	1.8209
TRO	-0.69604	1.58677	-4.19507	3.22551e-05	0.000559636	1.80809
ADRA2C	-0.814491	0.69594	-4.19374	3.2438e-05	0.000562237	1.80278
C3orf38	0.245052	3.89696	4.19241	3.26232e-05	0.000564873	1.79743
BCORL1	-0.361272	3.98302	-4.18928	3.30611e-05	0.000571874	1.7849
PHAX	0.187008	4.87074	4.18801	3.32402e-05	0.000574388	1.77983
KCNK5	0.498011	2.4471	4.18713	3.33646e-05	0.000575953	1.77632
FTH1P3	-0.410517	-0.96233	-4.18659	3.34416e-05	0.000576698	1.77416
CD19	0.843297	-0.90815	4.18326	3.39184e-05	0.000584329	1.76087
CLCA4	1.19237	2.58438	4.18294	3.39651e-05	0.000584544	1.75957
PYCR1	-0.562738	5.07942	-4.1818	3.41291e-05	0.000586773	1.75505
EMILIN3	-0.857449	-0.639776	-4.18094	3.42547e-05	0.000587957	1.7516
FAM21A	0.211364	4.69914	4.18085	3.4267e-05	0.000587957	1.75126
CASP8	0.294951	4.59629	4.178	3.46849e-05	0.000594362	1.73988
MLANA	0.530724	-1.58387	4.17783	3.47101e-05	0.000594362	1.7392
TXNDC17	0.355096	6.18917	4.17719	3.48047e-05	0.000595385	1.73664
HMHA1	0.350399	4.93168	4.17654	3.49001e-05	0.000596418	1.73407
ZDHHC8	-0.283617	5.377	-4.17421	3.52478e-05	0.000601756	1.72477
AGO2	-0.301726	6.24156	-4.173	3.5429e-05	0.000604243	1.71995
CLEC11A	-0.519863	3.14801	-4.1719	3.55947e-05	0.000606463	1.71557
LILRA6	0.607529	0.215491	4.17166	3.56314e-05	0.000606482	1.7146
PARP3	0.385121	3.8956	4.16825	3.61495e-05	0.000614687	1.70105
AKR7A3	-0.677591	-1.08958	-4.16644	3.64277e-05	0.000618798	1.69386
RGL3	-0.683616	-1.44382	-4.16348	3.6888e-05	0.000625994	1.68207
P2RX1	0.588462	-0.222582	4.16224	3.70823e-05	0.000628651	1.67714
CCDC109B	0.310838	4.6595	4.16201	3.71184e-05	0.000628651	1.67623
CPNE2	-0.32279	5.10759	-4.15644	3.8004e-05	0.000643011	1.65409
C22orf39	-0.253139	3.79065	-4.15478	3.82713e-05	0.000646892	1.64752
CHN2	0.4932	0.360068	4.15407	3.83862e-05	0.000648191	1.6447
IBSP	-0.91959	-0.642504	-4.15293	3.85708e-05	0.000650663	1.6402
ITGAE	0.337013	3.93882	4.15165	3.87808e-05	0.000653558	1.63511
TRERF1	0.363731	4.64169	4.1487	3.92664e-05	0.00066018	1.62343
RP5-1056H1.2	-0.555727	0.31696	-4.14863	3.92782e-05	0.00066018	1.62315
IGLV7-46	1.18366	-0.133974	4.14845	3.93077e-05	0.00066018	1.62244
CLTCL1	-0.451996	3.29743	-4.14833	3.93287e-05	0.00066018	1.62194
C10orf128	0.467565	1.49815	4.14795	3.93912e-05	0.00066024	1.62045
TMPRSS3	0.85028	-0.0560183	4.14766	3.94397e-05	0.00066024	1.6193
PCED1B	0.399932	2.8198	4.14761	3.94486e-05	0.00066024	1.61909
SLC37A1	0.478816	3.35279	4.14721	3.95147e-05	0.000660699	1.61751
AC133644.2	0.490848	-0.711065	4.14665	3.9609e-05	0.000661626	1.61528
POU2AF1	0.782719	2.55882	4.14556	3.97908e-05	0.000664012	1.61098
THEMIS2	0.418931	4.38486	4.14225	4.03505e-05	0.000672693	1.59788
LRP4	-0.544237	3.69502	-4.13763	4.11437e-05	0.000685246	1.57961
GLG1	-0.225938	7.75896	-4.13541	4.15296e-05	0.000690998	1.57086
FTH1P7	-0.407953	0.12865	-4.13468	4.16577e-05	0.000692453	1.56797
TTC1	0.212211	5.30781	4.13176	4.21729e-05	0.000700333	1.55644
CPA3	0.754612	2.34765	4.12993	4.24998e-05	0.000705075	1.54919
VEGFA	-0.437029	6.84287	-4.12923	4.26247e-05	0.00070646	1.54644
TBCC	0.221467	4.35956	4.12798	4.28496e-05	0.000709095	1.54151
DACT3	-0.536786	0.850905	-4.12788	4.2867e-05	0.000709095	1.54113
BRD4	-0.227667	6.9254	-4.12679	4.30631e-05	0.000711001	1.53684
EMX1	-0.885556	-0.903388	-4.12678	4.30657e-05	0.000711001	1.53679
LDLRAD2	-0.394456	0.0867561	-4.1264	4.31344e-05	0.000711446	1.53529
EBI3	0.578655	0.547934	4.12287	4.37785e-05	0.000720688	1.52139
FAM19A5	-0.75473	0.988415	-4.12287	4.37794e-05	0.000720688	1.52137
MAFG-AS1	-0.503274	1.46797	-4.12251	4.38451e-05	0.000721074	1.51997
S1PR4	0.58497	1.33537	4.12203	4.39332e-05	0.000721826	1.51808
IGHM	1.14152	5.16447	4.12102	4.41212e-05	0.000723851	1.51408
IK	0.174114	6.51663	4.12091	4.41414e-05	0.000723851	1.51365
C14orf37	-0.58528	1.48123	-4.12066	4.41877e-05	0.000723913	1.51267
TMC8	0.478884	3.99996	4.11952	4.43988e-05	0.000726673	1.5082
PTPN6	0.30439	5.43219	4.11704	4.48627e-05	0.000733562	1.49845
ANKRD13B	-0.446302	3.34192	-4.11153	4.59128e-05	0.000750011	1.47676
IL33	0.956369	2.29178	4.10998	4.62115e-05	0.000754168	1.47068
RP11-527N22.1	-0.544441	-1.60517	-4.10917	4.63685e-05	0.000756007	1.4675
SLC2A11	-0.449123	1.3412	-4.10692	4.6807e-05	0.000762426	1.45867
ASPHD1	-0.647198	1.06879	-4.10625	4.69381e-05	0.000763832	1.45605
FAM126B	0.278316	4.27072	4.10535	4.71163e-05	0.000765999	1.4525
SPATA2L	-0.274222	3.4162	-4.10234	4.77137e-05	0.000774973	1.44069
GRHPR	0.256082	6.04425	4.10156	4.78686e-05	0.000776748	1.43765
IKBKE	0.317262	4.4928	4.09888	4.84074e-05	0.000784744	1.42716
ACP2	0.260609	5.36346	4.0972	4.87496e-05	0.00078954	1.42056
NKPD1	-0.726476	1.34641	-4.0938	4.9447e-05	0.00079925	1.40725
CLEC7A	0.593159	3.95672	4.09368	4.94711e-05	0.00079925	1.40679
LINC01138	0.377984	0.870088	4.09359	4.94899e-05	0.00079925	1.40643
PMAIP1	0.435738	4.32713	4.09242	4.97327e-05	0.000801713	1.40185
SLC1A2	-0.769941	-1.32487	-4.0924	4.97365e-05	0.000801713	1.40177
G0S2	-0.71229	2.70183	-4.0884	5.05734e-05	0.000814432	1.38614
KBTBD8	0.398437	1.32945	4.08794	5.06705e-05	0.000815225	1.38434
ZNF618	0.517379	3.95235	4.08481	5.13361e-05	0.000825155	1.37211
AK5	-0.714598	-0.492895	-4.08423	5.1459e-05	0.000826352	1.36987
TOX	0.692856	1.67639	4.08365	5.1584e-05	0.000827061	1.3676
AADAT	-0.730469	0.555641	-4.08358	5.16003e-05	0.000827061	1.3673
IGHA2	1.29661	5.28576	4.08328	5.16648e-05	0.000827317	1.36613
MELK	0.390514	4.81015	4.08267	5.17962e-05	0.000828642	1.36375
AQP9	-0.745584	1.20699	-4.08053	5.22601e-05	0.000835279	1.3554
NAIP	0.642248	-1.55673	4.08021	5.23284e-05	0.000835587	1.35417
SNAPC2	-0.242855	4.12017	-4.07938	5.25102e-05	0.000837705	1.35092
UBR2	0.247738	5.70911	4.0781	5.27912e-05	0.0008414	1.34592
TYROBP	0.531236	4.61255	4.07645	5.3154e-05	0.000846391	1.33951
FAM111A	0.322663	5.00168	4.07604	5.32444e-05	0.000847038	1.33792
PLCL2	0.537642	1.78143	4.07456	5.35745e-05	0.00085087	1.33212
ST3GAL3	-0.351394	3.271	-4.07444	5.36013e-05	0.00085087	1.33166
TPSB2	0.815724	2.40788	4.0742	5.36531e-05	0.00085087	1.33075
TNFSF18	0.916255	-0.405903	4.07399	5.3701e-05	0.00085087	1.32992
KCMF1	-0.175094	6.32897	-4.07384	5.37349e-05	0.00085087	1.32932
RTN2	-0.376456	3.07705	-4.07176	5.42014e-05	0.00085746	1.32123
LTBP3	-0.436435	5.75759	-4.07146	5.42677e-05	0.000857712	1.32008
MYH16	-0.672806	-0.653298	-4.07066	5.44486e-05	0.000859397	1.31697
TVP23A	0.426672	-0.652061	4.07054	5.44752e-05	0.000859397	1.31651
CD163	0.716761	4.26205	4.0679	5.5078e-05	0.000868102	1.3062
RP13-582O9.5	-0.501557	0.890929	-4.06659	5.53768e-05	0.000872006	1.30113
TLE4	0.363793	4.99327	4.06513	5.57145e-05	0.000876514	1.29544
MYCBP	0.199629	4.54289	4.06388	5.60033e-05	0.000880244	1.2906
MMP25-AS1	0.412434	1.62679	4.06322	5.61568e-05	0.000881843	1.28803
APOBEC3A	0.88355	3.94989	4.06108	5.66583e-05	0.000888898	1.27971
SDC2	-0.617331	4.60851	-4.06022	5.686e-05	0.000889885	1.27638
APLP1	-0.604368	1.10434	-4.06015	5.68769e-05	0.000889885	1.2761
SPEG	-0.647501	3.32781	-4.06015	5.68779e-05	0.000889885	1.27608
RP11-830F9.5	-0.705158	-0.469077	-4.05912	5.71192e-05	0.000892354	1.27212
CTB-58E17.5	-0.487865	-1.41675	-4.0589	5.71726e-05	0.000892354	1.27124
ZNF101	0.255494	3.29907	4.05881	5.71928e-05	0.000892354	1.27091
DGKI	-0.684245	0.135535	-4.05601	5.78616e-05	0.000901963	1.26003
FADS1	-0.52624	5.12065	-4.05561	5.79569e-05	0.000902623	1.25849
RNF145	0.281862	6.93036	4.05527	5.8038e-05	0.00090306	1.25718
TPSAB1	0.663654	2.44182	4.05096	5.90833e-05	0.000918486	1.24046
CCDC93	-0.249168	4.86631	-4.05057	5.9179e-05	0.000919135	1.23895
RP1-92O14.3	-0.481935	-0.673052	-4.0473	5.99858e-05	0.000930819	1.22627
IGKV1-27	1.25658	0.665747	4.04698	6.00638e-05	0.00093118	1.22505
FAM13B	0.352623	3.75851	4.04578	6.0364e-05	0.000934984	1.22039
ARTN	-0.647931	3.06981	-4.04549	6.04349e-05	0.000935231	1.21929
RP11-253M7.1	-0.396557	-1.67771	-4.04503	6.05507e-05	0.000936174	1.2175
TOE1	0.252717	3.29534	4.044	6.08085e-05	0.000939306	1.21352
GNB1L	-0.313128	3.39327	-4.04294	6.10755e-05	0.000942576	1.20942
NLRC4	0.370634	0.336048	4.04194	6.13285e-05	0.000945624	1.20555
CITF22-92A6.1	-0.406468	-0.0536548	-4.03971	6.1897e-05	0.000953387	1.19691
ARHGEF3	0.300396	4.90978	4.03952	6.19439e-05	0.000953387	1.1962
TTLL11	0.36706	2.05241	4.03725	6.25278e-05	0.000961506	1.18742
TAOK3	0.256644	5.11552	4.037	6.25913e-05	0.000961615	1.18647
MAT2A	0.321143	6.73919	4.03567	6.29358e-05	0.000966036	1.18133
ZNF671	0.480674	0.322458	4.03515	6.3071e-05	0.00096724	1.17932
ERAP2	0.896819	4.61306	4.03415	6.33323e-05	0.000970064	1.17545
FAM162B	0.562017	-1.53131	4.03401	6.3369e-05	0.000970064	1.17491
MYH11	-0.790383	3.51482	-4.02808	6.49375e-05	0.000993182	1.15203
EIF1	-0.185409	9.01145	-4.02768	6.50439e-05	0.000993769	1.1505
IGHV4-59	1.22915	2.18203	4.0275	6.50925e-05	0.000993769	1.1498
PPWD1	0.245395	4.06305	4.02523	6.57026e-05	0.00100218	1.14107
KIF17	-0.403974	0.626143	-4.02426	6.59654e-05	0.00100529	1.13734
AGAP2	0.371944	2.29026	4.02359	6.61474e-05	0.00100717	1.13476
C4A	0.762641	0.280309	4.02211	6.65509e-05	0.00101241	1.12907
P4HA1	-0.359198	5.78478	-4.02064	6.69569e-05	0.00101767	1.12338
TCN2	0.527251	3.76358	4.01987	6.71669e-05	0.00101995	1.12045
GCNT1	0.540835	3.11341	4.01926	6.73362e-05	0.00102162	1.11809
IRF9	0.437291	2.12604	4.01886	6.74469e-05	0.00102238	1.11656
FLJ22447	-0.531118	-0.503907	-4.01729	6.78841e-05	0.0010281	1.11051
NRROS	0.514561	1.51561	4.01589	6.82754e-05	0.0010331	1.10513
CFLAR	0.244991	6.54776	4.01561	6.83547e-05	0.00103339	1.10405
RND2	-0.78633	-0.0238102	-4.01537	6.84213e-05	0.00103348	1.10314
AC009237.8	-0.59655	-0.0126773	-4.01454	6.86562e-05	0.00103611	1.09993
DANCR	-0.473671	4.34443	-4.01309	6.90643e-05	0.00104134	1.09439
AD000864.6	0.480884	-1.70703	4.01235	6.92757e-05	0.00104361	1.09153
CD84	0.686788	2.51688	4.00856	7.03606e-05	0.00105829	1.07699
IGHV1-69	1.23863	-0.0386164	4.00851	7.03746e-05	0.00105829	1.07681
RP11-660L16.2	-0.558956	0.909856	-4.0082	7.04641e-05	0.00105836	1.07562
MBD2	0.217106	6.55394	4.00807	7.05037e-05	0.00105836	1.07509
TDRD6	0.537976	-0.461093	4.00698	7.08201e-05	0.00106218	1.07091
MMP24	-0.4733	-0.711593	-4.00654	7.09477e-05	0.0010625	1.06922
SLC39A14	-0.424028	6.06436	-4.00647	7.09664e-05	0.0010625	1.06898
MFAP5	-0.930018	3.52072	-4.00166	7.23808e-05	0.00108272	1.05052
FLYWCH2	-0.2389	4.16018	-3.99851	7.33199e-05	0.00109581	1.03846
C9orf40	0.354837	2.59579	3.99599	7.40806e-05	0.00110621	1.02881
NFX1	0.251886	5.42377	3.99531	7.42867e-05	0.00110832	1.02621
DCLRE1C	0.263712	3.0691	3.99468	7.44782e-05	0.0011102	1.02381
CRLF1	-0.68552	2.36837	-3.98884	7.62765e-05	0.00113601	1.0015
AP000892.6	-0.54725	0.0932333	-3.98359	7.793e-05	0.00115963	0.981453
CASC8	-0.706378	-0.784399	-3.98248	7.82827e-05	0.00116386	0.977232
HLA-DPB2	0.918058	-1.31227	3.9809	7.87886e-05	0.00117036	0.971211
BRI3	-0.255221	5.74872	-3.98009	7.90483e-05	0.00117319	0.968135
MS4A2	0.751268	-0.836703	3.97938	7.92781e-05	0.00117558	0.965422
CTC-277H1.7	-0.443048	-0.56337	-3.9776	7.98555e-05	0.00118311	0.958639
KDELC1	-0.356845	2.75908	-3.97677	8.01263e-05	0.00118609	0.955475
TMEM173	0.330246	6.07571	3.97607	8.03561e-05	0.00118846	0.952799
PSTPIP2	0.456313	4.02311	3.9741	8.10017e-05	0.00119636	0.945321
PTPRJ	0.436404	3.93858	3.97401	8.10308e-05	0.00119636	0.944984
GSDMD	0.341421	6.1515	3.97376	8.11163e-05	0.00119659	0.943999
SIGLEC7	0.602766	-0.418355	3.97345	8.12168e-05	0.00119703	0.942841
UBLCP1	0.20696	5.08781	3.97277	8.14435e-05	0.00119934	0.940236
CDH17	0.708811	-1.50148	3.96747	8.32178e-05	0.00122441	0.920098
MEFV	0.642502	0.781664	3.96534	8.39424e-05	0.001234	0.911997
C9orf85	0.219637	3.34582	3.96155	8.52451e-05	0.00125207	0.89761
SMU1	0.213169	6.16985	3.95789	8.6519e-05	0.00126969	0.883751
GSDMB	0.571558	2.89934	3.95506	8.75206e-05	0.00128317	0.873
RNF34	0.193725	4.78324	3.95487	8.75882e-05	0.00128317	0.872278
FAM175B	0.178808	4.40196	3.95411	8.78571e-05	0.001286	0.869415
MYO1G	0.510377	3.74891	3.95119	8.89024e-05	0.00129989	0.858368
TUBB4A	-0.815893	-0.87781	-3.95104	8.89582e-05	0.00129989	0.857782
DIRAS1	-0.89167	0.969111	-3.95057	8.91265e-05	0.00130123	0.856016
ZNF346	0.205388	3.40565	3.94867	8.98163e-05	0.00131018	0.848816
MSI1	-1.01374	-0.191346	-3.94761	9.02004e-05	0.00131466	0.84483
PAX8-AS1	-0.858945	3.29479	-3.94544	9.09966e-05	0.00132508	0.836623
TMCC2	-0.470033	2.7313	-3.94524	9.10714e-05	0.00132508	0.835855
SFMBT2	0.44602	2.55921	3.94492	9.11895e-05	0.00132567	0.834645
CX3CL1	0.743177	5.00489	3.94283	9.19635e-05	0.00133578	0.826751
LMO2	0.371303	2.70474	3.94204	9.22577e-05	0.00133892	0.823769
C12orf43	0.179869	3.90143	3.94152	9.2451e-05	0.00134058	0.821814
RP5-1198O20.4	-0.466244	-1.13087	-3.94058	9.28046e-05	0.00134456	0.81825
DUOX2	0.795905	4.42398	3.94023	9.29364e-05	0.00134533	0.816925
TTBK1	0.582038	-1.51056	3.93913	9.33494e-05	0.00135016	0.812784
SMO	-0.610751	4.15001	-3.93877	9.34868e-05	0.001351	0.811412
TBC1D16	-0.345062	5.3321	-3.93784	9.38363e-05	0.0013549	0.807927
REEP5	0.159917	6.7552	3.93736	9.40204e-05	0.00135641	0.806097
LMAN2	0.210221	7.19256	3.93635	9.4406e-05	0.00136082	0.802276
LACC1	0.369118	3.12689	3.93417	9.52413e-05	0.0013717	0.794051
MMD	-0.311629	3.48167	-3.93225	9.5981e-05	0.00138119	0.786828
NLRP3	0.54916	1.34291	3.93071	9.65803e-05	0.00138864	0.781017
INHBE	-0.648865	-1.33802	-3.92979	9.69364e-05	0.00139258	0.777582
LRRK2	0.629694	1.77282	3.92618	9.836e-05	0.00141148	0.763972
DENND1C	0.344601	3.65418	3.92588	9.8477e-05	0.00141148	0.762863
PACS2	-0.221073	5.61378	-3.92582	9.85005e-05	0.00141148	0.76264
DAB2IP	0.3083	6.93143	3.92542	9.86617e-05	0.0014126	0.761114
TMEM246	-0.718808	3.93781	-3.92506	9.8804e-05	0.00141345	0.759769
ZBTB5	0.277474	4.72461	3.92448	9.90337e-05	0.00141555	0.757601
LINC00944	0.664933	-0.665186	3.92415	9.91677e-05	0.00141628	0.756339
ULBP1	-0.803385	0.0665187	-3.92165	0.000100171	0.00142941	0.746943
FPR1	0.559032	2.13511	3.92101	0.000100432	0.00143193	0.74452
HARS	0.164816	5.96939	3.92009	0.000100803	0.00143602	0.741072
MTURN	-0.366898	4.10933	-3.91877	0.000101337	0.00144163	0.73614
DOPEY1	0.353376	3.79839	3.91851	0.000101446	0.00144163	0.735136
ZNF883	-0.912602	-1.00477	-3.9185	0.00010145	0.00144163	0.7351
MR1	0.298695	5.09323	3.91655	0.00010225	0.00145178	0.727772
MTSS1L	-0.299912	4.35269	-3.91598	0.000102483	0.00145388	0.725644
RP5-1136G13.2	-0.298257	1.32761	-3.91423	0.000103207	0.00146199	0.719077
TMEM176A	0.53858	3.76437	3.91418	0.000103227	0.00146199	0.718901
FERMT2	-0.519745	3.91292	-3.9139	0.000103342	0.00146239	0.717861
ESM1	-0.520918	2.1567	-3.9137	0.000103426	0.00146239	0.7171
OXNAD1	0.224656	3.03633	3.90698	0.000106258	0.00150118	0.691896
SLC17A9	-0.562031	2.03803	-3.90061	0.000109008	0.00153875	0.668061
BZRAP1-AS1	0.549745	-1.43193	3.89942	0.000109527	0.0015448	0.663631
TLN2	-0.451297	3.79997	-3.89638	0.00011087	0.00156245	0.652264
RNF125	0.453056	1.28467	3.89519	0.0001114	0.00156862	0.647812
OAZ3	0.3104	0.0342685	3.89497	0.000111499	0.00156872	0.646986
2019-09-05	-0.485933	4.28187	-3.89431	0.000111795	0.00157158	0.644515
CPT1C	-0.446847	2.2008	-3.89263	0.000112546	0.00158083	0.638271
STOM	0.300319	7.74004	3.89195	0.000112855	0.00158387	0.635711
RP11-230F18.5	-0.442792	-1.4052	-3.89132	0.000113139	0.00158656	0.633363
AGBL5	-0.273632	4.61163	-3.88985	0.000113808	0.00159462	0.627868
CYP2W1	-1.16492	-0.780428	-3.88959	0.000113926	0.00159496	0.626902
PLA2R1	-0.52411	4.26724	-3.8888	0.000114284	0.00159866	0.623978
ACTG2	-0.664075	1.92853	-3.88842	0.000114459	0.0015998	0.622546
IGHG3	1.03646	6.41118	3.88804	0.000114634	0.00160093	0.621125
RP11-93B14.10	0.582674	-1.38566	3.88758	0.000114842	0.00160252	0.619432
MMAA	0.234595	2.93043	3.88545	0.000115826	0.00161493	0.611478
LINC00936	-0.434208	-0.281889	-3.88353	0.000116719	0.00162604	0.60432
PLCB2	0.465744	2.84583	3.88184	0.000117509	0.00163572	0.598026
DEXI	-0.200448	2.48635	-3.88124	0.000117789	0.00163827	0.595812
SHANK1	-0.659551	-1.22077	-3.88085	0.000117973	0.0016395	0.594354
ADAMTS14	-0.515517	2.76669	-3.88037	0.000118197	0.00164128	0.592581
KIF7	-0.483915	2.49476	-3.87853	0.00011907	0.00165205	0.585724
SCUBE3	-1.00793	0.417307	-3.87489	0.00012081	0.00167483	0.572196
C2orf76	-0.261923	2.10063	-3.87367	0.000121403	0.00168168	0.567637
FAM168B	-0.253055	6.77985	-3.87326	0.0001216	0.00168304	0.566121
NOL6	0.291214	6.26784	3.87295	0.000121752	0.00168377	0.56496
MRGBP	-0.244958	4.90367	-3.87049	0.000122948	0.00169893	0.555851
FAM229B	-0.459462	1.17034	-3.86953	0.000123419	0.00170385	0.552283
SEMA4F	-0.355963	3.53963	-3.86926	0.000123553	0.00170385	0.551272
MTHFR	0.250483	4.63138	3.86916	0.000123603	0.00170385	0.550893
MRPS18C	0.218748	3.71872	3.86793	0.000124208	0.00171067	0.546342
BFSP1	-0.458016	1.71115	-3.86775	0.000124299	0.00171067	0.54566
CD248	-0.534696	5.08115	-3.86698	0.000124678	0.00171363	0.542826
ZNF358	-0.40046	4.4746	-3.86691	0.000124715	0.00171363	0.542544
FOLR2	0.614662	2.18723	3.86445	0.000125942	0.00172909	0.533424
CDC37L1	0.261602	4.11434	3.86202	0.000127161	0.00174443	0.524444
SLC8A1	0.513797	2.19602	3.86152	0.000127415	0.00174618	0.522586
SMOX	-0.407907	4.55387	-3.86137	0.000127494	0.00174618	0.522006
C16orf95	-0.42723	0.220871	-3.86086	0.000127751	0.00174829	0.520135
DHCR7	-0.525152	6.48033	-3.8606	0.000127885	0.00174872	0.519157
AC009501.4	-0.656551	-0.457115	-3.85931	0.00012854	0.00175493	0.514395
SLC35D1	0.282006	4.63405	3.8593	0.000128545	0.00175493	0.514359
SUGCT	-0.511763	2.6415	-3.85671	0.000129876	0.00177167	0.504763
ITGA9	0.469778	2.63385	3.85575	0.000130372	0.00177703	0.501206
BHLHE40-AS1	0.431346	-0.652765	3.85023	0.000133255	0.00181487	0.480828
RP11-187C18.3	0.627244	-1.41222	3.8483	0.000134279	0.00182735	0.473703
RP4-647J21.1	0.596947	-0.165108	3.84737	0.000134775	0.00183264	0.470265
KIAA1468	0.318251	5.06882	3.84701	0.00013497	0.00183382	0.468921
PEX3	0.229127	3.78196	3.84459	0.000136271	0.00185003	0.459982
SLC18B1	0.298662	3.71732	3.83949	0.000139047	0.00188573	0.441201
SELP	0.836992	1.17747	3.83935	0.000139122	0.00188573	0.440697
CDH24	-0.330176	3.71312	-3.83905	0.000139289	0.0018865	0.439579
RAC2	0.431437	5.81747	3.83794	0.000139903	0.00189318	0.435488
PLA1A	0.673175	-0.286505	3.83769	0.000140043	0.00189318	0.434552
KHDRBS3	-0.582042	1.8622	-3.83755	0.000140116	0.00189318	0.434068
VNN2	0.678739	0.0869815	3.83714	0.000140346	0.00189478	0.432542
APTX	0.248053	4.93732	3.83684	0.000140513	0.00189554	0.43143
GPNMB	-0.599217	8.8609	-3.83571	0.000141143	0.00190253	0.427266
RNF114	0.192953	6.07919	3.83409	0.000142049	0.00191224	0.421311
DUSP4	0.515182	3.93003	3.83402	0.000142088	0.00191224	0.421055
FKBP15	0.209078	5.92707	3.83299	0.000142669	0.00191855	0.417251
EPCAM	-0.750946	5.04015	-3.83265	0.00014286	0.0019196	0.416007
CTSC	0.369375	8.14717	3.83101	0.000143786	0.00193052	0.40999
TLR2	0.438382	4.53911	3.83061	0.000144013	0.00193204	0.408523
MT1L	-0.741784	0.586647	-3.82989	0.000144424	0.00193603	0.405868
ANO7	-0.433548	-0.112334	-3.82736	0.000145872	0.00195387	0.396582
LL22NC03-80A10.6	-0.226476	2.58177	-3.82717	0.000145984	0.00195387	0.395867
SNHG18	-0.579284	2.09261	-3.82649	0.000146372	0.00195753	0.393395
FTH1P8	-0.422288	-0.280376	-3.82606	0.000146622	0.00195933	0.391806
UHMK1	0.249547	6.78648	3.8254	0.000147003	0.00196288	0.389393
FTH1P2	-0.420096	-1.16806	-3.82092	0.000149623	0.00199569	0.372946
SLU7	0.166716	5.34172	3.8208	0.000149694	0.00199569	0.372502
KLHL7	-0.212769	4.75572	-3.81861	0.000150992	0.00201142	0.364466
TMEM106A	0.337725	2.06553	3.81739	0.00015172	0.00201858	0.359988
RP11-983P16.4	-0.436484	0.958938	-3.81731	0.000151767	0.00201858	0.359702
FKBP9P1	-0.534818	1.30674	-3.81454	0.00015343	0.00203911	0.349561
NSA2	0.205807	5.74829	3.81369	0.000153943	0.00204433	0.346454
AMFR	-0.184497	6.61297	-3.81312	0.000154287	0.00204731	0.344374
RASGRP2	0.45314	1.14744	3.81126	0.000155421	0.00206075	0.337561
ZFYVE26	0.237088	5.36432	3.81047	0.000155909	0.00206561	0.334642
FAM131A	-0.374303	4.31589	-3.80795	0.000157455	0.00208388	0.325462
PSMA6	0.255816	5.15663	3.80783	0.000157532	0.00208388	0.325004
TSPY26P	-0.578865	1.08565	-3.80694	0.000158082	0.00208953	0.321761
MAST3	0.268477	3.61039	3.80655	0.000158328	0.00209043	0.320317
KCNK1	-0.358679	5.31448	-3.80644	0.000158395	0.00209043	0.31992
SYN1	-0.604801	-0.118717	-3.80548	0.000158993	0.0020953	0.316418
UBA6	0.281304	6.45178	3.80545	0.000159011	0.0020953	0.316312
DNAJC4	-0.259476	4.39697	-3.80098	0.000161828	0.00213078	0.299972
GNG5	0.176911	6.13009	3.80045	0.000162161	0.00213351	0.298059
ANO7P1	0.372957	1.93143	3.79959	0.000162708	0.00213906	0.294925
ZNF812	0.874382	2.54781	3.79802	0.000163713	0.00215062	0.289196
CDC42EP5	-0.465758	2.08778	-3.79326	0.000166798	0.00218945	0.271834
PRX	-0.334317	1.90152	-3.79161	0.000167881	0.00220196	0.265814
GLT1D1	0.571349	-0.781954	3.78897	0.000169622	0.00222309	0.256217
MOB3B	0.49271	4.6279	3.78772	0.000170454	0.00223152	0.251667
FTH1	-0.304301	8.5787	-3.78761	0.000170527	0.00223152	0.251269
SEMA4G	-0.506381	0.764283	-3.78622	0.000171457	0.00224196	0.246213
ITFG3	-0.229722	5.76573	-3.78574	0.000171778	0.00224361	0.244473
IGKV3D-20	1.10194	-0.316789	3.78564	0.000171846	0.00224361	0.244101
PLAC8	0.879973	1.91659	3.78519	0.000172148	0.00224583	0.242472
SERTAD4-AS1	-0.515731	-0.294353	-3.78227	0.000174121	0.00226983	0.231874
NCOA4	0.266464	7.54279	3.78042	0.000175383	0.00228338	0.22516
MAP3K1	0.315654	4.87494	3.78036	0.000175428	0.00228338	0.224919
RP3-439F8.1	-0.533135	0.111091	-3.77908	0.000176307	0.00229307	0.220272
AP000692.10	0.433666	-1.63229	3.7778	0.000177189	0.00230278	0.215634
ZCCHC10	0.191684	3.76027	3.77695	0.000177774	0.00230862	0.212568
CYTH3	-0.278455	4.97067	-3.7747	0.000179348	0.00232654	0.204375
AC012358.8	-0.609041	-1.11133	-3.77458	0.000179427	0.00232654	0.203964
MVP	0.247677	7.93208	3.7705	0.000182305	0.00236206	0.189172
CELF2	0.506645	3.61007	3.76951	0.000183011	0.00236941	0.185576
ASS1	0.528828	6.6257	3.76821	0.000183935	0.00237956	0.180896
APOBR	0.439583	3.32974	3.76575	0.000185708	0.00240068	0.171978
ZFHX3	-0.335623	4.46392	-3.7646	0.000186544	0.00240966	0.167806
RNF152	0.463444	4.99558	3.75872	0.000190857	0.0024635	0.146563
PNMAL1	-1.00294	0.348471	-3.75716	0.000192017	0.0024766	0.140934
HNRNPAB	0.197642	7.27845	3.7567	0.000192357	0.0024791	0.13929
ZP3	-0.42478	2.73725	-3.75568	0.000193126	0.00248714	0.135582
SYNRG	0.211034	5.16496	3.75453	0.000193989	0.00249636	0.131441
2019-03-05	0.185904	5.41066	3.75242	0.00019558	0.00251493	0.123852
CTB-58E17.1	-0.382175	0.967146	-3.75114	0.000196553	0.00252433	0.119241
PEX11B	0.180142	4.72154	3.75105	0.000196623	0.00252433	0.118909
MAFG	-0.283064	5.35896	-3.75088	0.000196755	0.00252433	0.118284
ZFP64	-0.245493	4.8162	-3.75064	0.000196937	0.00252476	0.117428
RP11-407N17.6	0.27235	0.24192	3.74736	0.000199455	0.00255512	0.105625
ATP10B	0.858514	2.70151	3.74585	0.000200625	0.00256819	0.100189
HPS5	0.260235	4.65976	3.74552	0.000200886	0.00256959	0.0989851
MRPL44	0.172781	4.56999	3.74531	0.00020105	0.00256976	0.0982258
TOMM40L	0.198962	4.03552	3.74296	0.000202886	0.00259129	0.0897803
ST6GAL2	-0.996348	-0.140501	-3.7421	0.000203563	0.00259798	0.0866865
HHIPL1	-0.511812	1.49867	-3.74121	0.000204267	0.00260328	0.0834784
SNX2	0.187435	5.49216	3.74119	0.000204283	0.00260328	0.0834059
PIK3R3	0.449983	4.02381	3.74098	0.000204445	0.00260339	0.0826693
VPS4B	0.254468	6.19204	3.74076	0.00020462	0.00260367	0.0818761
STX1A	-0.347693	2.58185	-3.7391	0.000205938	0.00261849	0.0759125
LRRC73	-0.55615	-0.75811	-3.73887	0.000206128	0.00261894	0.0750587
ODC1	-0.625874	7.6377	-3.73716	0.000207489	0.00263428	0.0689431
GTPBP2	0.208043	5.78781	3.73659	0.000207955	0.00263823	0.0668615
BARX1	-0.957216	1.34751	-3.73539	0.000208922	0.00264813	0.0625531
MEX3A	-0.556811	2.50893	-3.73523	0.000209047	0.00264813	0.0620003
LYN	0.403935	5.44753	3.7348	0.000209396	0.00265059	0.0604487
HSD11B1L	-0.500254	1.58854	-3.73447	0.000209662	0.00265198	0.0592703
TUSC1	0.46351	3.95098	3.72939	0.000213821	0.00270259	0.0410309
HMGN2P3	0.406254	-1.26931	3.72851	0.000214547	0.00270975	0.0378847
TMEM184B	-0.218251	6.79814	-3.72632	0.000216364	0.00273068	0.0300536
GRAMD1C	0.459996	2.07543	3.72553	0.000217026	0.002737	0.0272196
TMEM171	0.472268	2.24745	3.72374	0.000218525	0.0027517	0.0208266
KIAA2026	0.349965	4.55637	3.7237	0.000218567	0.0027517	0.0206497
DLL1	0.444647	4.44033	3.7234	0.000218815	0.0027517	0.0195975
FZD7	-0.610299	4.25169	-3.72337	0.000218838	0.0027517	0.0195018
RBM47	0.344655	5.37621	3.72268	0.000219423	0.00275703	0.0170196
STAT6	0.209079	7.55661	3.7197	0.000221956	0.0027868	0.00636827
MAP4K4	-0.244052	7.5543	-3.71861	0.000222895	0.00279653	0.00244896
DCAF10	0.248646	5.22513	3.71793	0.000223477	0.00280176	3.02826e-05
ARHGAP5-AS1	-0.333879	1.86708	-3.71268	0.000228037	0.00285683	-0.0187171
BID	-0.313967	5.11078	-3.71185	0.000228764	0.00286383	-0.0216714
ZCCHC14	-0.270127	5.33422	-3.71131	0.000229245	0.00286775	-0.0236207
PMEPA1	-0.479106	6.74098	-3.70873	0.000231526	0.00289416	-0.0328095
HMGN2	0.258329	7.41892	3.70805	0.000232133	0.00289962	-0.0352367
SPTBN4	-0.525592	-0.897174	-3.70768	0.000232461	0.00290159	-0.036547
TRIM9	-0.673776	0.419816	-3.70713	0.000232953	0.00290561	-0.0385116
RASSF5	0.334694	5.34215	3.70581	0.000234143	0.00291831	-0.0432384
PLAG1	-0.720766	1.81055	-3.70441	0.000235403	0.00293187	-0.048217
HCK	0.460738	4.1254	3.70404	0.000235734	0.00293385	-0.0495225
VAX2	-0.795788	-1.11154	-3.70341	0.00023631	0.00293887	-0.0517864
ESPNL	-0.878489	-0.569398	-3.70317	0.000236522	0.00293936	-0.0526159
CCDC71	0.177597	4.09848	3.7028	0.000236863	0.00293996	-0.0539538
DNAJC1	0.206056	4.632	3.70274	0.000236915	0.00293996	-0.0541578
CTA-384D8.35	0.497417	2.0785	3.70252	0.000237119	0.00294035	-0.0549565
METAP2	0.148832	6.57054	3.70228	0.000237337	0.00294091	-0.0558086
FKBP1B	-0.434124	1.30151	-3.70165	0.000237909	0.00294586	-0.0580431
KLHL6	0.48763	2.75286	3.69734	0.000241874	0.00299277	-0.0733734
KIF21B	0.434439	2.48773	3.6964	0.000242748	0.00300141	-0.0767208
TMPRSS11D	1.01683	5.21923	3.69616	0.000242965	0.00300191	-0.0775474
GRAP	0.402705	-0.566215	3.69521	0.000243855	0.00301072	-0.0809387
chr22-38_28785274-29006793.1	-0.421202	3.76431	-3.69471	0.000244321	0.00301429	-0.0827108
MAPKAPK5-AS1	-0.280507	3.26504	-3.69336	0.000245587	0.00302772	-0.0875056
ST6GAL1	0.556462	4.48001	3.69057	0.000248221	0.00305798	-0.0973993
WDR54	-0.332595	4.1269	-3.68945	0.000249291	0.00306895	-0.101389
CCDC74B	-0.677117	-0.950252	-3.68926	0.000249473	0.00306896	-0.102064
OXTR	-0.494136	-0.218699	-3.68888	0.000249834	0.00307119	-0.103405
ZNF658	0.358499	1.07901	3.68852	0.000250184	0.00307328	-0.104705
ZDHHC6	0.175978	4.77393	3.68577	0.000252824	0.00310346	-0.114437
ERCC2	-0.215674	4.47561	-3.682	0.000256491	0.00314622	-0.127792
MALT1	0.232407	5.40992	3.68064	0.000257834	0.00316042	-0.132633
CXCL5	-1.00523	1.00179	-3.68006	0.000258404	0.00316512	-0.134679
CAMK4	0.542368	1.55462	3.67795	0.000260492	0.0031884	-0.14214
USP16	0.203987	5.12231	3.67667	0.000261765	0.00320168	-0.146659
CTXN1	-0.545848	1.32834	-3.67622	0.000262213	0.00320486	-0.148244
RNF24	-0.277126	4.58312	-3.67495	0.000263492	0.00321819	-0.152755
SLK	0.254741	6.95657	3.6745	0.000263937	0.00322132	-0.154321
DNAJC28	0.323495	-0.391436	3.6743	0.000264144	0.00322154	-0.155047
CA14	-0.373257	-0.720556	-3.67302	0.000265432	0.00323492	-0.159554
ARHGAP18	0.314387	3.80134	3.66683	0.000271768	0.00330863	-0.18142
HPGD	0.704607	2.21176	3.66673	0.000271867	0.00330863	-0.181759
FAM101B	-0.367534	4.36484	-3.6638	0.000274923	0.00334343	-0.192117
CCRL2	0.417319	0.735681	3.66331	0.000275432	0.00334723	-0.193831
PITPNA	0.162454	6.63391	3.66147	0.000277369	0.00336837	-0.200325
MRPL39	0.210066	4.09591	3.66124	0.000277603	0.0033688	-0.201105
SV2A	-0.622472	1.66793	-3.65969	0.000279244	0.00338474	-0.206567
RP11-403I13.8	0.331323	0.478726	3.65963	0.000279313	0.00338474	-0.206797
IGHV1-69-2	1.16337	1.58958	3.65928	0.000279682	0.00338679	-0.208018
CTHRC1	-0.582832	4.89202	-3.65621	0.000282962	0.00342408	-0.21882
CD38	0.677673	3.32176	3.65576	0.000283445	0.0034275	-0.220402
GTF2IRD2P1	-0.521282	1.46906	-3.6552	0.000284052	0.00343086	-0.222384
VAMP3	0.162713	6.82282	3.65513	0.000284126	0.00343086	-0.222625
GPER1	-0.507301	1.15523	-3.65349	0.000285896	0.00344979	-0.228378
SLC35F6	0.172124	6.22758	3.65262	0.000286844	0.00345824	-0.231445
CARD11	0.602351	3.13833	3.65248	0.000287003	0.00345824	-0.231957
LRRC17	-0.778411	1.22188	-3.65134	0.000288238	0.00347067	-0.235935
SLC39A10	-0.306113	4.18675	-3.65003	0.000289678	0.00348555	-0.240553
SKA2	0.221475	5.27189	3.64951	0.000290253	0.00349	-0.242388
ITPKA	-0.543392	0.755343	-3.64751	0.000292458	0.00351231	-0.249397
PYROXD1	0.219036	3.28548	3.64745	0.000292521	0.00351231	-0.249597
EFCAB1	-0.754151	-0.316177	-3.64636	0.000293731	0.00352375	-0.253422
SLFN12	0.38048	1.77478	3.64622	0.000293887	0.00352375	-0.253914
RPL23AP82	-0.259354	2.64831	-3.64456	0.000295747	0.00354356	-0.259756
CD72	0.554961	0.732689	3.64373	0.000296673	0.00355215	-0.262651
HDC	0.612927	-0.651843	3.64316	0.000297321	0.00355741	-0.26467
VPS4A	-0.165877	5.82335	-3.64273	0.000297806	0.00356071	-0.26618
LIF	-0.651536	2.40707	-3.64202	0.000298605	0.00356776	-0.268661
FN1	-0.75183	9.74054	-3.64157	0.000299113	0.00357133	-0.270237
CTA-293F17.1	-0.414141	0.0861974	-3.64072	0.000300071	0.00357709	-0.273197
RHBDL1	-0.620491	0.604339	-3.64059	0.000300225	0.00357709	-0.273673
ACTA2	-0.492344	5.83565	-3.64059	0.000300226	0.00357709	-0.273674
EMR1	0.779583	0.220829	3.63936	0.000301629	0.00358694	-0.277993
RBPMS2	-0.473046	-0.212781	-3.63932	0.000301664	0.00358694	-0.278101
ITGB3	-0.622251	0.222334	-3.63931	0.000301684	0.00358694	-0.27816
SEMA4D	0.356652	5.00034	3.6385	0.000302612	0.00359547	-0.281004
TTC22	0.382882	5.27842	3.63723	0.000304066	0.00361023	-0.285445
FBXO10	0.311407	2.01591	3.63595	0.000305534	0.00362513	-0.289903
CCL21	0.916325	3.30658	3.63567	0.000305857	0.00362644	-0.290882
RP11-44N21.1	-0.507215	0.144895	-3.63417	0.000307599	0.00364456	-0.296141
BRSK1	-0.483434	0.51118	-3.63354	0.000308332	0.00365071	-0.298344
GRB14	-0.764608	-0.945726	-3.63322	0.000308707	0.0036526	-0.299467
CYFIP2	0.484379	3.29057	3.63273	0.000309277	0.00365681	-0.301177
BATF3	0.402208	0.804755	3.6319	0.000310253	0.0036658	-0.304092
RTN3	-0.173359	6.9214	-3.63056	0.000311826	0.00368183	-0.308776
B4GALNT1	-0.634936	2.87309	-3.63037	0.000312041	0.00368183	-0.309414
APCDD1L	-0.762027	1.53737	-3.62998	0.000312509	0.0036848	-0.310801
PARVB	-0.381577	4.65383	-3.628	0.000314845	0.00370977	-0.317693
ATP6V1G1	0.176072	6.85396	3.62711	0.000315907	0.00371971	-0.320811
METTL15	0.21331	3.10605	3.62678	0.000316307	0.00372131	-0.321982
FBXW7	0.218728	4.37898	3.62663	0.000316479	0.00372131	-0.322486
RMND5B	0.23111	4.75221	3.62559	0.000317729	0.00373163	-0.326135
GLYCTK	0.266118	1.56575	3.62553	0.000317795	0.00373163	-0.326326
LRP3	-0.51706	3.47084	-3.62091	0.000323382	0.00379461	-0.342455
FZD1	-0.413651	5.16313	-3.62058	0.000323781	0.00379669	-0.343598
WIBG	0.180927	4.97497	3.61731	0.000327788	0.00384103	-0.35498
SOGA1	-0.324342	6.28754	-3.61661	0.000328657	0.00384856	-0.357429
CMAHP	0.480301	1.477	3.61512	0.000330496	0.00386744	-0.362593
CCDC74A	-0.605421	0.795279	-3.6149	0.000330776	0.00386806	-0.363376
RP11-390P2.4	-0.399459	0.96386	-3.61357	0.000332431	0.00388475	-0.367993
BAIAP2-AS1	-0.293028	3.44229	-3.61288	0.000333302	0.00389225	-0.370413
RP5-1014D13.2	-0.272917	0.611683	-3.61269	0.00033353	0.00389225	-0.371047
C6orf223	-0.864351	-0.015984	-3.61244	0.000333847	0.00389329	-0.371927
TTC3	-0.253677	6.54762	-3.61149	0.000335045	0.00390458	-0.375239
PDZK1IP1	0.784665	5.92669	3.61044	0.000336364	0.00391728	-0.378876
MGAT5	-0.27541	5.89979	-3.61006	0.000336844	0.00392018	-0.380193
AKT3	-0.465738	3.92268	-3.60966	0.000337354	0.00392344	-0.381593
TCFL5	-0.232193	3.93835	-3.60916	0.000337995	0.00392781	-0.383349
KRT74	-0.569527	-1.36375	-3.609	0.000338191	0.00392781	-0.383886
RP11-575F12.3	-0.753842	-0.654789	-3.60806	0.00033939	0.00393906	-0.387161
ANKRD36BP2	0.757317	-0.830764	3.60612	0.000341868	0.00396486	-0.39389
DEF6	0.219608	5.16645	3.60596	0.000342079	0.00396486	-0.394462
RP11-395L14.11	-0.258609	1.48055	-3.60538	0.000342826	0.00397081	-0.396477
LILRA5	0.538852	0.61545	3.6045	0.000343958	0.00398122	-0.399526
FAM214A	0.306498	4.45385	3.60348	0.000345273	0.00399373	-0.403056
CSNK1E	-0.191789	7.06145	-3.60225	0.000346867	0.00400945	-0.407318
HSD17B4	0.222373	6.18996	3.60199	0.00034721	0.00401069	-0.408232
EXOC2	0.197663	5.11657	3.60043	0.00034924	0.0040314	-0.413622
GMIP	0.214684	4.3882	3.59939	0.000350614	0.00404453	-0.417255
NFAM1	0.529882	2.63118	3.59724	0.000353442	0.00407439	-0.424683
SPR	-0.25706	4.68074	-3.59699	0.000353776	0.00407549	-0.425558
PITX1	0.433805	6.91156	3.5968	0.000354024	0.00407558	-0.426205
PPAPDC1A	-0.795547	0.872286	-3.59658	0.000354314	0.00407617	-0.426963
ARFIP1	0.190914	4.93873	3.59569	0.000355497	0.00408701	-0.430044
COLEC11	-0.71941	-0.606862	-3.59508	0.000356315	0.00409365	-0.432168
ABL2	-0.262789	5.53383	-3.59453	0.000357047	0.00409931	-0.434068
PSD	-0.344215	1.36001	-3.59383	0.000357993	0.00410739	-0.436513
THADA	-0.159325	5.31946	-3.59302	0.000359075	0.00411704	-0.439305
CRYM-AS1	-0.401263	-1.87125	-3.59239	0.000359919	0.00412394	-0.441474
IGSF9B	-0.7428	-0.717695	-3.59047	0.000362512	0.00414909	-0.448112
PALMD	0.401756	4.80347	3.59041	0.000362601	0.00414909	-0.448339
ATP6V1E2	-0.311061	2.37696	-3.58992	0.000363257	0.0041534	-0.45001
GYG1	0.243909	5.63057	3.58977	0.000363466	0.0041534	-0.450541
STRIP1	0.171131	5.00087	3.58893	0.000364613	0.00416372	-0.453455
ACOX3	0.234078	4.28045	3.58648	0.000367968	0.00419923	-0.461924
DENND1B	0.259374	4.26428	3.5858	0.000368901	0.00420705	-0.464264
ENPP2	0.532031	3.21749	3.58423	0.000371064	0.00422889	-0.469669
MED11	0.190105	3.52858	3.58388	0.000371556	0.00423166	-0.470893
RP1-309I22.2	-0.677992	-1.01973	-3.57852	0.000379061	0.00431426	-0.489376
APOBEC3C	0.304905	5.96662	3.57758	0.000380398	0.00432658	-0.492631
IGLON5	-0.524898	-0.405509	-3.57635	0.000382136	0.00434345	-0.496843
HLA-DQA2	0.767702	3.42804	3.5756	0.00038321	0.00435275	-0.499436
HIST1H2AC	0.390461	5.01204	3.5753	0.000383638	0.00435472	-0.500469
VAMP5	0.374365	4.11845	3.57257	0.000387568	0.00439639	-0.509885
PGGT1B	0.175204	4.22846	3.57099	0.000389855	0.00441939	-0.515322
CTC-231O11.1	0.598011	-0.917857	3.57059	0.000390434	0.00442301	-0.516694
GNG2	0.423877	3.08776	3.56597	0.000397198	0.00449665	-0.532562
LOXL1	-0.49056	4.32679	-3.56479	0.00039895	0.00451349	-0.536629
PCDH7	0.663731	5.24024	3.56408	0.000399993	0.00452229	-0.539042
AGPAT3	0.253435	6.13001	3.56282	0.000401885	0.00454066	-0.543399
FAM114A2	0.187477	3.86626	3.56228	0.000402683	0.00454667	-0.545233
CRHR1-IT1	-0.279243	3.45209	-3.56208	0.000402981	0.00454701	-0.545915
PLGRKT	0.310865	4.06291	3.56187	0.000403293	0.00454752	-0.54663
HKDC1	-0.885061	0.12469	-3.56146	0.000403913	0.0045515	-0.548049
SLC6A14	1.06354	3.0367	3.56	0.000406109	0.00457322	-0.553057
FBXL17	0.265331	4.04158	3.55859	0.000408242	0.00459421	-0.557896
CALB2	-0.792602	1.83203	-3.55781	0.000409426	0.00460449	-0.56057
BMP8B	-0.47304	2.20343	-3.55618	0.000411915	0.00462943	-0.566169
PKD1	-0.245005	5.81349	-3.55483	0.000413984	0.00464961	-0.570794
CDH4	-0.794015	-0.243017	-3.55435	0.000414716	0.00465477	-0.572428
PAOX	0.238296	2.90597	3.55392	0.000415375	0.00465909	-0.573892
TCF3	-0.230134	6.54032	-3.55357	0.000415917	0.0046621	-0.575097
RHOG	0.173264	6.13057	3.55305	0.000416723	0.00466806	-0.576885
EIF4A3	0.181744	7.04403	3.55205	0.000418264	0.00468224	-0.580292
RP5-827C21.4	-0.477448	-0.558116	-3.55155	0.000419036	0.00468781	-0.581996
KLRG1	0.502627	-1.46438	3.55091	0.000420042	0.00469598	-0.584209
FTH1P20	-0.329554	0.794225	-3.54958	0.000422118	0.00471609	-0.588762
KLK1	-0.669836	1.01357	-3.5493	0.000422546	0.00471779	-0.589698
RBM24	-0.926138	-0.356601	-3.54903	0.00042297	0.00471822	-0.590624
SLC13A5	-1.09082	0.197008	-3.54892	0.000423148	0.00471822	-0.591014
SERPINB13	0.783653	5.83772	3.54875	0.000423415	0.00471822	-0.591596
COLGALT1	-0.207494	7.4556	-3.54789	0.000424766	0.00472908	-0.594537
C16orf46	-0.307355	-0.185442	-3.54762	0.000425189	0.00472908	-0.595456
CA2	0.678	5.65403	3.5476	0.000425224	0.00472908	-0.59553
CECR5	-0.22044	5.21694	-3.54476	0.00042971	0.00477587	-0.605221
RP3-508I15.9	-0.333196	0.185292	-3.54412	0.000430737	0.00478256	-0.607424
NINL	-0.442928	3.38296	-3.54403	0.000430874	0.00478256	-0.607717
AC133785.1	-0.564279	-0.408726	-3.54381	0.000431219	0.00478327	-0.608456
NTRK1	0.463096	-0.817449	3.5433	0.000432046	0.00478933	-0.610224
KCND3	0.595707	2.62356	3.54265	0.000433083	0.0047977	-0.612437
XPNPEP3	-0.206713	4.17804	-3.54205	0.000434044	0.00480523	-0.614485
DGUOK-AS1	-0.406832	1.24245	-3.54184	0.000434382	0.00480584	-0.615202
CTD-3074O7.5	-0.320475	0.726136	-3.53997	0.000437397	0.00483093	-0.621588
JOSD1	-0.192455	6.52897	-3.53995	0.000437418	0.00483093	-0.621632
MTA1	-0.236683	5.58018	-3.5399	0.000437506	0.00483093	-0.621817
MRPS10	0.185435	5.71083	3.53973	0.000437783	0.00483093	-0.622402
GANC	0.23882	4.2248	3.53916	0.000438709	0.00483801	-0.624353
PRELID1P1	0.318867	-0.920656	3.53869	0.000439459	0.00484314	-0.625928
CTD-2026K11.6	-0.478223	-1.26275	-3.53839	0.000439951	0.00484543	-0.626962
MAPK8IP1	-0.465014	2.02577	-3.53758	0.000441279	0.00485691	-0.629742
NEIL2	-0.23073	3.73958	-3.53675	0.000442621	0.00486855	-0.632547
CATSPER2P1	-0.266577	0.655309	-3.53622	0.000443488	0.00487198	-0.634352
OSBPL6	-0.407317	2.87273	-3.53621	0.000443505	0.00487198	-0.634388
VPS33A	0.137157	4.05394	3.53421	0.000446793	0.00490493	-0.641204
OST4	-0.194278	6.43973	-3.53383	0.00044742	0.00490866	-0.642499
GCAT	-0.367947	3.47983	-3.52874	0.000455905	0.00499853	-0.659834
MAN1C1	0.458066	1.85321	3.52763	0.000457772	0.00501577	-0.663605
MARK4	-0.175181	5.59712	-3.526	0.000460531	0.00504276	-0.669149
TBCE	-0.183426	4.65689	-3.52563	0.000461158	0.00504638	-0.670404
RP3-394A18.1	-0.32582	0.77076	-3.52495	0.000462311	0.00505575	-0.672709
RP11-35G9.3	0.328562	-0.36298	3.52473	0.000462685	0.00505659	-0.673454
GNAS	-0.187865	9.53769	-3.52352	0.000464761	0.00507602	-0.677584
BMP8A	-0.53725	-0.867419	-3.52295	0.000465738	0.00508343	-0.679521
LACE1	0.173374	1.80059	3.52173	0.000467832	0.00510115	-0.683659
RIC1	0.311929	4.79633	3.52165	0.00046796	0.00510115	-0.683912
PDIA5	-0.28312	4.61466	-3.52146	0.000468288	0.00510147	-0.684559
NME2	-0.332229	0.387762	-3.52076	0.000469494	0.00511133	-0.686931
ABHD16A	0.271481	2.18551	3.52031	0.000470273	0.00511654	-0.68846
AC005076.5	-0.424438	-1.56593	-3.52001	0.000470796	0.00511897	-0.689486
GPT	-0.562534	0.162105	-3.51955	0.000471602	0.00512446	-0.691064
RBCK1	0.206428	6.43973	3.51794	0.000474392	0.00515149	-0.696504
CDK14	-0.522682	3.62591	-3.51734	0.000475442	0.00515961	-0.698544
BEAN1	-0.533067	0.0116037	-3.51595	0.000477873	0.00518269	-0.703248
SPTY2D1-AS1	-0.329265	-1.05293	-3.51568	0.000478347	0.00518452	-0.704161
IL22RA2	0.710541	-0.902538	3.51414	0.000481074	0.00521077	-0.709404
RP4-724E16.2	-0.426996	-1.18876	-3.51273	0.000483565	0.00523195	-0.714167
MANBA	-0.275653	4.78424	-3.51269	0.000483644	0.00523195	-0.714318
COL5A3	-0.463893	5.97563	-3.51082	0.000486975	0.00526043	-0.720647
MIR635	-0.370133	-1.54707	-3.51077	0.000487065	0.00526043	-0.720818
MAGED1	-0.374136	6.88369	-3.51069	0.000487203	0.00526043	-0.721079
DNAJC7	0.137622	6.37035	3.50979	0.000488823	0.00527458	-0.72414
CDH15	-0.810386	-0.836788	-3.50918	0.000489907	0.00528293	-0.726182
VCP	0.219971	8.95584	3.50594	0.000495765	0.00534272	-0.737142
ANXA8L1	0.468545	4.9396	3.50518	0.000497155	0.00535432	-0.739724
LIMS2	-0.396192	2.83127	-3.50444	0.000498494	0.00536534	-0.742203
UNKL	-0.29207	3.25917	-3.50354	0.000500144	0.00537971	-0.745251
CYB5D2	0.237351	3.41751	3.50307	0.000501008	0.0053856	-0.746842
HEYL	-0.426944	3.07917	-3.49955	0.000507505	0.005452	-0.75872
DYNC1I1	-0.815961	0.594343	-3.49926	0.000508053	0.00545445	-0.759714
GDF7	-0.553641	-1.47295	-3.49687	0.000512519	0.00549893	-0.767782
SLC43A2	0.32262	5.07924	3.49605	0.000514053	0.00551192	-0.770536
ST14	0.301771	8.0243	3.49556	0.00051497	0.00551828	-0.772179
SLC7A4	-0.948118	-0.484913	-3.49526	0.000515531	0.00552082	-0.773182
CPT2	0.177468	4.27154	3.49436	0.000517246	0.0055357	-0.776243
RAP1GAP	-0.476411	3.27671	-3.49301	0.000519802	0.00555957	-0.780786
HCFC1R1	-0.269503	5.2736	-3.49163	0.000522432	0.00558419	-0.785436
COL11A1	-0.99652	3.77006	-3.49135	0.000522955	0.00558627	-0.786358
DGKD	-0.301408	4.24243	-3.49027	0.000525024	0.00560487	-0.789998
MRC2	-0.399818	6.7754	-3.4899	0.000525744	0.00560903	-0.79126
TRMT112	-0.208527	7.00845	-3.48947	0.000526565	0.00561428	-0.792698
CRKL	-0.244747	7.09828	-3.48901	0.000527452	0.00562021	-0.794248
LAPTM5	0.452106	6.6964	3.48794	0.00052951	0.00563862	-0.797838
SLC15A1	-0.84553	1.18304	-3.48643	0.000532433	0.00566608	-0.80291
LARP1B	-0.260637	3.84853	-3.48627	0.000532754	0.00566608	-0.803464
OTOF	0.660466	-1.22219	3.4859	0.000533478	0.00567024	-0.804716
POC5	0.23403	2.74875	3.48479	0.000535634	0.00568712	-0.808432
USP3-AS1	-0.339271	-1.13993	-3.48474	0.000535733	0.00568712	-0.808603
MAGI2	-0.445498	0.879056	-3.48436	0.000536487	0.00569158	-0.809899
DUOXA2	0.776467	0.960791	3.484	0.000537188	0.00569547	-0.811102
ALMS1-IT1	-0.426716	-0.967827	-3.4837	0.000537771	0.0056981	-0.8121
IL17RC	0.208419	4.59416	3.48318	0.000538788	0.00570533	-0.813842
SNHG19	-0.479398	2.47579	-3.48296	0.000539217	0.00570632	-0.814575
C19orf26	-0.377939	0.928436	-3.48258	0.00053997	0.00571075	-0.815861
PPFIA4	-0.571186	1.40918	-3.47988	0.00054532	0.00576307	-0.824943
SLC25A1	-0.211412	6.25839	-3.47974	0.000545594	0.00576307	-0.825405
SRFBP1	0.248082	3.30066	3.47755	0.00054996	0.00580559	-0.832747
RP11-401P9.4	-0.593307	0.236638	-3.4767	0.000551671	0.00582004	-0.835607
MMRN1	0.780489	0.462362	3.47436	0.000556381	0.0058661	-0.843438
GAL	-1.00783	-0.473528	-3.47394	0.000557226	0.00587072	-0.844836
SAMD14	-0.396452	0.142143	-3.47373	0.000557662	0.00587072	-0.845556
IL11	-0.586113	2.2379	-3.47342	0.00055829	0.00587072	-0.846593
TSNARE1	-0.29449	3.58757	-3.4734	0.000558337	0.00587072	-0.84667
HTRA3	-0.546639	5.24623	-3.47328	0.00055857	0.00587072	-0.847055
VKORC1L1	-0.206266	5.53716	-3.47313	0.000558886	0.00587072	-0.847576
AC025171.1	0.355177	0.0153777	3.47292	0.000559297	0.00587141	-0.848252
SH2D3C	0.315312	3.30873	3.47244	0.000560289	0.00587821	-0.849884
DCUN1D2	-0.266658	3.02697	-3.47047	0.000564317	0.00591682	-0.856481
TMEM121	-0.466537	-0.0117385	-3.4667	0.000572091	0.00599464	-0.869079
GOLGA1	0.185232	4.73891	3.46526	0.000575102	0.00602249	-0.873913
TESC	0.471037	0.105384	3.46485	0.000575956	0.00602773	-0.875279
ARSE	-0.645545	-0.354146	-3.46206	0.000581821	0.00608394	-0.884606
SMIM15	0.177471	5.47979	3.46195	0.000582042	0.00608394	-0.884956
SLC7A7	0.459069	3.22828	3.46061	0.000584879	0.00610985	-0.889432
NECAB3	-0.274552	3.72747	-3.46026	0.000585636	0.00611402	-0.890623
TRIM34	0.424507	-1.35286	3.45966	0.000586893	0.00612338	-0.892597
KLHL42	-0.25487	4.79592	-3.45921	0.000587857	0.00612716	-0.894108
FKBP14	-0.286915	4.42653	-3.45895	0.000588414	0.00612716	-0.894978
SLC25A22	0.255318	5.33105	3.45883	0.000588662	0.00612716	-0.895366
ZNF703	-0.410711	5.0472	-3.45882	0.000588693	0.00612716	-0.895416
BBS2	-0.21979	4.23327	-3.45844	0.000589502	0.00613183	-0.896679
CTC-512J14.5	0.258483	-0.889078	3.45643	0.000593824	0.00617302	-0.903403
MXRA7	-0.285455	5.85043	-3.45602	0.000594701	0.00617836	-0.904761
RAB35	0.126943	6.11895	3.45479	0.000597356	0.00620216	-0.908861
CDR2	-0.261303	4.16313	-3.45364	0.000599847	0.00622423	-0.91269
IGHV4-34	1.01834	1.57224	3.4529	0.000601444	0.00623701	-0.915138
ANXA1	0.455371	10.1427	3.45003	0.000607735	0.00629841	-0.924714
RP11-93B14.9	0.429893	1.08196	3.44912	0.000609732	0.00631527	-0.927733
SETD3	-0.152658	5.82088	-3.44827	0.000611608	0.00633085	-0.930559
POLR2J	-0.237252	4.9465	-3.44676	0.000614966	0.00636174	-0.935597
HVCN1	0.427707	1.6246	3.44393	0.000621291	0.00642328	-0.945012
COL2A1	-0.731736	-0.285157	-3.44251	0.000624488	0.00645242	-0.949734
AC009506.1	-0.325365	0.397568	-3.44204	0.000625544	0.00645941	-0.951288
GDI1	-0.172642	6.99501	-3.43865	0.000633238	0.0065349	-0.962534
NAT1	0.300597	1.70793	3.43801	0.000634694	0.00654595	-0.964645
MAD2L1BP	0.166941	4.3947	3.43634	0.000638536	0.0065816	-0.970197
TBX2	-0.417917	2.90699	-3.43559	0.000640269	0.00659547	-0.97269
MAP1A	-0.570972	3.4908	-3.43531	0.000640921	0.00659819	-0.973626
DGAT1	-0.205025	5.24287	-3.4341	0.000643709	0.0066229	-0.977618
TSPAN32	0.520003	-1.09699	3.43373	0.000644575	0.0066278	-0.978854
ARMCX2	-0.541434	2.64478	-3.4333	0.000645571	0.00663282	-0.980274
ZCCHC2	0.248022	4.17299	3.43319	0.000645842	0.00663282	-0.98066
MCL1	0.179977	8.8511	3.43157	0.000649601	0.00666741	-0.985997
RAB11FIP5	-0.21358	5.68898	-3.43042	0.000652314	0.00669123	-0.98983
NABP1	0.312225	4.95215	3.42901	0.00065563	0.00672035	-0.994492
FN3K	-0.454845	1.8793	-3.42888	0.000655942	0.00672035	-0.99493
LILRB3	0.422766	0.535399	3.42748	0.000659246	0.00675014	-0.999549
MPP3	-0.353582	2.196	-3.42698	0.000660443	0.00675834	-1.00122
C1orf198	-0.234382	5.52632	-3.42507	0.00066498	0.00679747	-1.00751
RAB24	0.283831	2.92157	3.42504	0.000665065	0.00679747	-1.00763
SLC17A7	-0.57955	-0.5817	-3.42446	0.000666457	0.00680627	-1.00955
PFDN1	0.149078	5.60517	3.42425	0.000666954	0.00680627	-1.01024
LPXN	0.396531	3.54418	3.42418	0.000667124	0.00680627	-1.01047
GALM	0.38469	2.83569	3.42356	0.000668599	0.00681723	-1.0125
KDELR3	-0.401874	3.94744	-3.4233	0.00066924	0.00681968	-1.01338
REEP2	-0.534467	0.353629	-3.42157	0.000673415	0.00685813	-1.0191
METTL25	0.211748	1.59605	3.41979	0.000677721	0.00689786	-1.02496
ROBO3	-0.453382	1.63329	-3.41923	0.00067909	0.00690766	-1.02681
ETV4	-0.453244	4.45937	-3.41788	0.000682393	0.00693712	-1.03127
BTC	0.716538	-0.493402	3.41708	0.000684357	0.00695294	-1.03392
CXCR2	0.657903	0.951754	3.41391	0.000692169	0.00702812	-1.04435
AC010894.3	-0.405967	-1.46165	-3.41243	0.000695869	0.00706148	-1.04925
EFCAB10	-0.453966	-1.44309	-3.4122	0.000696435	0.00706301	-1.04999
RP11-109J4.1	0.695395	-0.278961	3.41166	0.000697781	0.00707245	-1.05177
DCTN3	0.227323	5.42818	3.41074	0.000700077	0.00709151	-1.05479
RCL1	0.269391	3.70859	3.40619	0.000711603	0.00720398	-1.06979
RP11-319G6.1	-0.327749	0.132384	-3.40595	0.000712192	0.00720566	-1.07055
BANK1	0.524578	0.483441	3.40508	0.000714432	0.00722054	-1.07344
JMJD8	-0.155435	5.19386	-3.40505	0.00071451	0.00722054	-1.07354
RAET1G	0.577841	2.01779	3.40473	0.000715309	0.00722432	-1.07456
MEI1	0.62722	1.20922	3.40404	0.000717081	0.00723793	-1.07684
FRMD3	0.438383	0.127973	3.40243	0.000721238	0.00727558	-1.08215
TUBA1C	0.207683	8.3128	3.39767	0.000733603	0.00738857	-1.09776
KIF26A	-0.532309	2.06777	-3.39767	0.000733604	0.00738857	-1.09776
ACAA1	0.189121	4.97505	3.39762	0.00073374	0.00738857	-1.09793
RPL8	-0.248184	10.7667	-3.39477	0.000741228	0.00745852	-1.10726
CTD-2173L22.4	0.478487	-1.72182	3.39465	0.000741562	0.00745852	-1.10767
GLS	-0.285537	6.15861	-3.3939	0.000743549	0.00747409	-1.11013
TOPORS	0.263914	4.44933	3.39359	0.000744367	0.00747791	-1.11114
SDAD1P1	-0.304665	0.452893	-3.39317	0.00074548	0.00748467	-1.11251
HSPB2	-0.616703	-0.498847	-3.39088	0.000751612	0.00754179	-1.12003
PSPC1	0.215441	4.67969	3.39064	0.000752251	0.00754377	-1.12081
ASNS	-0.374843	4.77966	-3.39005	0.000753822	0.00755299	-1.12273
PRR5	-0.25518	4.08196	-3.38996	0.000754058	0.00755299	-1.12302
TBKBP1	-0.310114	3.14986	-3.38869	0.000757493	0.00758294	-1.12719
AC009403.2	-0.276604	0.470907	-3.38714	0.000761683	0.0076204	-1.13225
CCDC8	-0.74672	2.73494	-3.38685	0.000762485	0.00762395	-1.13322
MICU2	0.182814	4.76091	3.38622	0.000764192	0.00763654	-1.13527
ARL6IP5	0.244427	6.15931	3.38597	0.000764856	0.00763869	-1.13607
CNTN1	-0.871493	3.7086	-3.38401	0.000770212	0.00768768	-1.14248
NRXN2	-0.590774	0.636373	-3.38262	0.000774045	0.00772141	-1.14703
LRRN3	0.450733	-0.430567	3.38141	0.000777382	0.00775017	-1.15098
THG1L	0.188494	3.68525	3.37828	0.000786091	0.00783241	-1.16121
GM2A	0.261656	7.97962	3.3775	0.000788263	0.00784946	-1.16374
FLOT2	0.19716	7.21999	3.37701	0.000789636	0.00785854	-1.16534
PLAA	0.250494	5.2053	3.37602	0.000792439	0.00788183	-1.16859
P2RX7	0.440934	2.15763	3.37531	0.000794439	0.00789525	-1.1709
MATK	-0.492627	1.39236	-3.37521	0.000794715	0.00789525	-1.17122
DAGLB	-0.17561	4.86849	-3.37383	0.000798603	0.00792926	-1.1757
SLC27A2	0.649729	0.271493	3.37326	0.000800239	0.00794087	-1.17758
CERCAM	-0.386145	5.85932	-3.37189	0.000804135	0.00797488	-1.18204
CTGF	-0.514504	6.4239	-3.36996	0.000809668	0.00802509	-1.18833
SAA2	0.820572	1.71206	3.36957	0.000810789	0.00803152	-1.1896
ATP6V0D2	-0.578731	-0.58451	-3.36835	0.000814293	0.00806155	-1.19355
CXCL16	0.264834	5.87823	3.36753	0.000816664	0.00808032	-1.19622
COL5A2	-0.541354	7.74659	-3.36514	0.000823611	0.00814433	-1.20399
IL4R	0.272795	7.01131	3.36336	0.000828836	0.00819125	-1.20979
KCTD21-AS1	-0.47607	-0.344656	-3.36298	0.000829938	0.00819387	-1.21101
RNF31	0.272841	4.31108	3.36289	0.000830211	0.00819387	-1.21131
CTD-2020K17.1	0.511204	-0.0637206	3.36278	0.000830545	0.00819387	-1.21168
SYDE1	-0.329403	3.44632	-3.35974	0.000839533	0.00827775	-1.22156
GSDMC	0.57385	5.12468	3.35948	0.000840297	0.00828049	-1.22239
TBK1	0.208197	4.75921	3.35927	0.000840926	0.00828191	-1.22308
CISH	0.256433	3.4419	3.35906	0.000841558	0.00828334	-1.22377
ICAM5	-0.533841	1.37414	-3.35595	0.000850864	0.00837011	-1.23385
RAB11FIP3	-0.224614	5.02138	-3.35528	0.00085288	0.00838273	-1.23602
GPATCH2	-0.204801	4.09755	-3.35519	0.000853132	0.00838273	-1.23629
ASB1	-0.194078	4.36886	-3.35479	0.000854337	0.00838974	-1.23759
ZDHHC1	-0.25442	3.47977	-3.3544	0.000855525	0.00839657	-1.23886
SKIV2L2	0.200989	5.65546	3.35363	0.000857865	0.00841468	-1.24137
MFAP2	-0.409481	5.5102	-3.3514	0.000864647	0.00847331	-1.24859
EMILIN1	-0.533663	5.09287	-3.35134	0.000864836	0.00847331	-1.24879
GRN	0.201751	9.40607	3.351	0.000865869	0.00847855	-1.24988
LINS	0.175625	3.85972	3.35039	0.000867747	0.0084885	-1.25187
CSNK2A2	-0.154456	6.30623	-3.35034	0.000867881	0.0084885	-1.25201
PDLIM1	0.22543	8.16729	3.34986	0.000869361	0.00849809	-1.25357
SAMD4B	-0.16722	6.97712	-3.34908	0.000871764	0.00851669	-1.2561
SCG2	-0.667569	0.406316	-3.34805	0.000874925	0.00854267	-1.25942
SMIM14	0.270759	5.61695	3.34579	0.000881929	0.00860613	-1.26673
NRIP3	-0.485143	2.37063	-3.34401	0.00088749	0.00865544	-1.27249
CTA-941F9.10	-0.406126	-1.42499	-3.34378	0.000888193	0.00865734	-1.27322
KDM4C	0.139091	-1.14577	3.34175	0.000894581	0.00871462	-1.27979
BTBD2	-0.194498	6.57393	-3.34118	0.000896367	0.00872096	-1.28161
STEAP3-AS1	-0.593052	-1.2179	-3.3411	0.000896649	0.00872096	-1.2819
CROT	0.280768	4.37887	3.34106	0.000896767	0.00872096	-1.28202
KIAA1549L	-0.608431	3.24317	-3.33949	0.00090172	0.00876023	-1.28707
RP11-686D22.4	0.391257	-1.35774	3.33946	0.000901834	0.00876023	-1.28719
PPAP2A	0.285968	3.926	3.33471	0.000917046	0.00890292	-1.30251
TNFSF13	0.351446	2.15056	3.33306	0.00092236	0.00894942	-1.30781
PLSCR4	0.44094	3.44533	3.33185	0.000926308	0.0089826	-1.31172
ARMC10	-0.184381	4.82161	-3.32762	0.000940163	0.00910916	-1.32532
IGF1R	-0.2977	6.81797	-3.32754	0.000940428	0.00910916	-1.32558
LINC00899	-0.337346	0.689529	-3.32704	0.000942085	0.00911732	-1.32719
NFATC2	0.436405	3.21669	3.32696	0.000942341	0.00911732	-1.32744
LARP7	0.177135	5.05223	3.32639	0.000944222	0.00913034	-1.32927
SLAMF8	0.461938	3.46046	3.32587	0.000945963	0.00914199	-1.33096
LINC00900	0.581335	-0.942214	3.32537	0.000947613	0.00915273	-1.33255
SDSL	0.37525	2.37218	3.32472	0.000949777	0.00916844	-1.33464
KIAA1045	-0.657806	0.695068	-3.32436	0.000950969	0.00917382	-1.33579
EDIL3	-0.611973	3.97881	-3.32423	0.000951411	0.00917382	-1.33622
MAPK12	-0.399762	3.59252	-3.32395	0.000952351	0.00917769	-1.33712
TRAPPC13	0.183083	3.74047	3.32288	0.00095593	0.00920697	-1.34056
C1orf56	-0.243106	1.98497	-3.32252	0.000957144	0.00920879	-1.34172
MRPS18A	0.157451	4.38782	3.3225	0.000957199	0.00920879	-1.34177
BCAS4	-0.38933	3.0181	-3.32158	0.000960293	0.00923334	-1.34473
TRIM72	-1.07344	0.147054	-3.32139	0.000960939	0.00923433	-1.34534
TMEM189	-0.198827	6.56771	-3.32062	0.000963532	0.00925404	-1.34781
HOMEZ	0.218487	4.46722	3.31986	0.000966103	0.0092735	-1.35025
ANKRD22	0.500611	3.90402	3.3179	0.000972762	0.00932535	-1.35654
LINC01057	-0.418045	-1.09216	-3.31782	0.000973037	0.00932535	-1.3568
CCNJL	0.562627	2.66744	3.31779	0.000973147	0.00932535	-1.3569
LINC00960	-0.820722	-0.164112	-3.31663	0.000977084	0.00935781	-1.3606
INTS6-AS1	-0.322531	0.0715906	-3.31596	0.000979396	0.00937469	-1.36277
MKRN2OS	0.469041	-0.406655	3.31484	0.000983248	0.00940627	-1.36636
AARS	-0.188801	7.1876	-3.31356	0.000987648	0.00944307	-1.37045
OSBP2	-0.439459	2.79806	-3.31263	0.000990872	0.00946858	-1.37343
RPS6KB1	0.175866	5.0973	3.31226	0.000992143	0.00947541	-1.37461
PCBP4	-0.239364	4.2749	-3.31188	0.000993487	0.00948293	-1.37585
KLF12	-0.436691	3.07598	-3.31093	0.00099679	0.00950913	-1.37888
PLRG1	0.150234	5.71169	3.30963	0.00100131	0.00954687	-1.38302
RP11-22C11.2	-0.466338	-0.13751	-3.3094	0.00100211	0.0095492	-1.38376
OBSCN	-0.456558	4.77629	-3.30906	0.00100334	0.00955521	-1.38488
TMEM161A	-0.21086	4.94083	-3.30885	0.00100406	0.00955521	-1.38553
BCAT1	-0.554906	4.34279	-3.30869	0.00100461	0.00955521	-1.38603
PARP4	0.304461	5.66159	3.30859	0.00100498	0.00955521	-1.38638
MOK	-0.393887	2.55456	-3.30717	0.00100997	0.00959728	-1.39091
EMC8	-0.15717	4.76762	-3.30592	0.0010144	0.00963397	-1.39491
ARG2	-0.420831	2.56977	-3.30548	0.00101593	0.00964314	-1.39629
IQGAP2	0.498029	2.46014	3.30512	0.00101721	0.00964995	-1.39745
TRMT10A	0.218985	2.19971	3.30397	0.00102131	0.00968337	-1.40112
MUC16	0.974355	1.83261	3.30273	0.00102573	0.0097199	-1.40508
TRIM41	0.179447	4.95602	3.30169	0.00102948	0.00974999	-1.40842
IPPK	0.395999	4.00141	3.30088	0.00103239	0.0097691	-1.411
PRRX2	-0.417642	3.35894	-3.3003	0.00103448	0.0097691	-1.41285
EFR3B	-0.528887	1.02548	-3.30019	0.00103488	0.0097691	-1.41321
RP11-498C9.15	-0.327032	1.27825	-3.30012	0.00103514	0.0097691	-1.41343
GGT7	-0.478693	3.09884	-3.2999	0.00103593	0.0097691	-1.41413
ATXN7	0.239436	4.27248	3.29978	0.00103636	0.0097691	-1.41451
PHYHIP	-0.519995	0.377184	-3.29976	0.00103643	0.0097691	-1.41458
GFM2	0.195112	4.56688	3.29974	0.00103649	0.0097691	-1.41463
OPLAH	-0.297064	4.57289	-3.29962	0.00103694	0.0097691	-1.41503
CRNN	1.50891	2.11051	3.29954	0.00103723	0.0097691	-1.41528
SSC4D	-0.383033	0.634445	-3.2993	0.00103809	0.00977183	-1.41604
KCNIP3	-0.475039	1.34828	-3.29867	0.00104037	0.00978784	-1.41805
PFKFB2	-0.259313	4.79843	-3.29773	0.00104379	0.00980985	-1.42105
SLC11A1	-0.394794	2.91686	-3.29771	0.00104386	0.00980985	-1.42111
RNASE2	0.531784	-1.5833	3.29614	0.00104958	0.00985822	-1.42611
SCCPDH	-0.406304	4.09409	-3.29507	0.00105351	0.00988967	-1.42953
RP11-378J18.8	-0.25507	0.0779859	-3.2932	0.00106039	0.00994453	-1.43549
MLK7-AS1	-0.407119	-1.28744	-3.29302	0.00106106	0.00994453	-1.43607
RAD9B	0.460692	-1.21255	3.293	0.00106111	0.00994453	-1.43611
ASGR2	0.415162	-1.19535	3.29233	0.00106359	0.00996227	-1.43824
RABGGTA	0.20118	5.41778	3.28981	0.00107298	0.0100448	-1.44628
C16orf45	-0.372844	2.2434	-3.28958	0.00107381	0.010047	-1.44699
FAM122C	0.268243	0.781706	3.28879	0.00107679	0.0100694	-1.44953
BMP2K	0.291408	3.62853	3.28744	0.00108183	0.0101109	-1.45379
DDX19B	-0.202392	3.46691	-3.28725	0.00108257	0.0101123	-1.45442
GRIN1	-0.631888	-1.16119	-3.28635	0.00108597	0.0101385	-1.45729
WASF3	-0.515473	1.89377	-3.28523	0.00109019	0.0101724	-1.46084
TLR5	0.433204	2.55523	3.28293	0.00109894	0.0102391	-1.46815
ZNRF1	-0.180862	4.94237	-3.28283	0.00109931	0.0102391	-1.46845
NTN4	0.428846	3.48048	3.28282	0.00109936	0.0102391	-1.46849
CARS2	-0.200745	5.11001	-3.28265	0.00110001	0.0102391	-1.46904
USF1	0.186739	5.3988	3.28256	0.00110035	0.0102391	-1.46932
CD1E	0.659175	-0.270114	3.28107	0.00110605	0.0102865	-1.47404
DESI2	-0.204096	5.83455	-3.28049	0.00110829	0.0103017	-1.47589
VAC14	-0.142635	5.89934	-3.28006	0.00110992	0.0103112	-1.47724
GLRX	0.313992	3.58868	3.27972	0.00111123	0.0103178	-1.47832
S100A9	0.739553	10.8382	3.27955	0.00111188	0.0103182	-1.47885
CCL13	0.613114	0.959962	3.27926	0.00111302	0.0103217	-1.47979
GYG2	-0.561019	0.50613	-3.27914	0.00111347	0.0103217	-1.48016
TTL	-0.185329	5.69727	-3.27897	0.00111413	0.0103222	-1.4807
KIAA1549	-0.583816	2.03236	-3.27843	0.00111623	0.0103361	-1.48243
PTDSS1	-0.216635	6.87635	-3.2768	0.00112255	0.0103889	-1.48758
CSNK1A1	0.251907	7.2241	3.27425	0.00113251	0.0104731	-1.49566
AMZ1	-0.540705	-0.810095	-3.27416	0.00113288	0.0104731	-1.49595
RP11-440D17.3	-0.49008	0.960901	-3.27337	0.00113598	0.0104945	-1.49845
RFNG	-0.196816	4.9221	-3.27325	0.00113643	0.0104945	-1.49881
PRKCQ-AS1	0.445439	1.58968	3.27269	0.00113866	0.0105091	-1.50061
MFNG	0.378321	2.789	3.27246	0.00113954	0.0105091	-1.50132
LSM12	0.168971	3.38823	3.27238	0.00113985	0.0105091	-1.50157
SPSB4	-0.71171	-0.921185	-3.27194	0.0011416	0.0105195	-1.50297
SYT1	-0.816496	0.764655	-3.27145	0.00114356	0.0105319	-1.50454
PIWIL2	-0.821178	-0.360446	-3.26981	0.00115007	0.0105861	-1.50973
ATG7	0.173439	4.46154	3.26859	0.00115493	0.0106251	-1.51357
PACSIN1	0.600124	-0.882131	3.26817	0.00115658	0.0106346	-1.51488
RP5-1085F17.3	-0.339678	2.15844	-3.26764	0.00115873	0.0106485	-1.51658
DDX23	0.125312	6.8246	3.26654	0.00116315	0.0106834	-1.52006
THOC5	-0.183136	4.93014	-3.26631	0.00116405	0.0106859	-1.52076
UNC45A	-0.139469	6.68817	-3.2661	0.0011649	0.010688	-1.52143
C18orf21	0.208775	3.54336	3.26592	0.00116563	0.010689	-1.52201
TDO2	0.567443	1.74826	3.26575	0.00116633	0.0106895	-1.52255
KIAA1257	-0.579636	-1.05806	-3.26436	0.00117195	0.0107353	-1.52694
TP53	0.44389	5.55742	3.26416	0.00117273	0.0107362	-1.52755
METTL22	-0.17718	3.42135	-3.26402	0.00117331	0.0107362	-1.528
PIK3CD-AS2	-0.477477	-0.495651	-3.26371	0.00117457	0.010742	-1.52898
RP11-867G23.3	-0.290485	-1.57276	-3.2628	0.00117827	0.01077	-1.53186
PTGER4	0.384303	3.02874	3.2622	0.00118072	0.0107866	-1.53376
WDR86	-0.458213	-0.00267206	-3.26087	0.00118616	0.0108292	-1.53796
RPL7P23	-0.311118	-0.767419	-3.26075	0.00118665	0.0108292	-1.53834
UBE2D2	0.130928	6.34334	3.25993	0.00118999	0.0108538	-1.5409
NBL1	-0.281269	5.99992	-3.25941	0.00119214	0.0108587	-1.54255
CHI3L1	-0.6936	4.76028	-3.25939	0.00119221	0.0108587	-1.5426
MT1F	-0.380142	2.26691	-3.25932	0.0011925	0.0108587	-1.54283
RP11-395G23.3	-0.473055	0.502765	-3.25918	0.00119307	0.0108587	-1.54327
DAZAP2	0.14718	7.76581	3.25868	0.00119516	0.010872	-1.54487
MYO7B	-0.705879	0.154468	-3.25799	0.00119801	0.0108921	-1.54704
THAP11	-0.178187	4.83824	-3.25776	0.00119896	0.0108949	-1.54776
C9orf64	0.252681	3.7823	3.25705	0.0012019	0.0109158	-1.55
RAB13	-0.174992	6.25956	-3.25687	0.00120263	0.0109165	-1.55055
KRT81	-0.647316	-0.0364256	-3.25543	0.00120862	0.0109651	-1.55509
RP11-54H7.4	-0.960252	3.74383	-3.25301	0.00121876	0.0110512	-1.56272
NECAB1	-0.605474	-0.825807	-3.25198	0.00122309	0.0110846	-1.56597
HOXC8	-0.612908	-0.221535	-3.25148	0.0012252	0.0110978	-1.56754
ATP6V1B1	-0.721344	-0.761102	-3.25074	0.00122833	0.0111202	-1.56986
RP11-111M22.3	-0.398138	0.83682	-3.24943	0.00123386	0.0111608	-1.57397
TCAF2	0.321686	3.13748	3.24936	0.00123417	0.0111608	-1.5742
FAM220A	-0.181617	4.6079	-3.24922	0.00123478	0.0111608	-1.57465
RP11-552M11.8	-0.410872	-1.7036	-3.24856	0.00123757	0.0111756	-1.57671
RP11-329N15.3	0.364554	-1.25825	3.24852	0.00123772	0.0111756	-1.57682
PRKCQ	0.492151	2.44786	3.24795	0.00124017	0.0111875	-1.57863
MAFA	-0.691336	-1.13787	-3.24791	0.00124036	0.0111875	-1.57877
PTH1R	-0.52615	-0.745948	-3.24742	0.00124245	0.0112005	-1.58031
GPBP1	0.156368	6.09057	3.24667	0.00124566	0.0112235	-1.58266
GAST	-0.833822	-0.537978	-3.24641	0.00124676	0.0112275	-1.58347
RP11-967K21.1	-0.399537	0.544798	-3.24602	0.00124844	0.0112366	-1.58469
VIM-AS1	0.453272	-0.14992	3.24495	0.00125302	0.0112701	-1.58804
LGI3	-0.86611	0.604559	-3.24485	0.00125348	0.0112701	-1.58837
GLCCI1	0.341972	2.54138	3.24429	0.00125588	0.0112857	-1.59012
TLR4	0.487204	2.32496	3.24406	0.00125686	0.0112881	-1.59083
GATB	0.184258	4.25067	3.24392	0.00125747	0.0112881	-1.59128
HSD11B2	-0.354294	2.77652	-3.24206	0.00126554	0.0113545	-1.59712
GABRD	-0.50559	-0.729086	-3.24182	0.00126658	0.0113579	-1.59787
CFI	0.508901	3.23258	3.24147	0.0012681	0.0113612	-1.59896
MPP6	-0.315765	3.27066	-3.24143	0.00126829	0.0113612	-1.5991
SH3RF2	0.326347	5.68082	3.24034	0.00127302	0.0113977	-1.6025
ZHX3	-0.224729	4.80534	-3.24006	0.00127428	0.0114029	-1.6034
MIR600HG	-0.473131	1.14038	-3.23985	0.00127519	0.0114051	-1.60405
CASC10	-0.361515	1.13281	-3.23887	0.00127947	0.0114374	-1.60711
PSMA4	0.18437	7.10705	3.23835	0.00128179	0.0114521	-1.60876
CPEB4	0.337167	4.7965	3.23813	0.00128272	0.0114544	-1.60943
NLE1	-0.201715	4.36476	-3.23715	0.00128706	0.0114835	-1.61251
PLIN2	-0.422986	4.04323	-3.23709	0.00128732	0.0114835	-1.61269
PHF23	0.141424	5.44819	3.2364	0.0012904	0.0115049	-1.61487
LMNB1	0.316476	5.7133	3.23594	0.0012924	0.0115167	-1.61629
SCYL1	-0.138729	6.67488	-3.23542	0.00129471	0.0115312	-1.61791
CTD-2336O2.1	-0.240153	2.09541	-3.23401	0.00130099	0.011576	-1.62234
TPRXL	0.453866	2.88325	3.23385	0.00130172	0.011576	-1.62284
ST8SIA2	-0.662872	-0.0166983	-3.23384	0.00130178	0.011576	-1.62289
ACOT13	0.195235	4.23433	3.2336	0.00130285	0.0115795	-1.62364
RP1-122P22.4	-0.619133	-0.998354	-3.23316	0.00130482	0.011591	-1.62502
ANXA2R	0.357032	1.13633	3.23184	0.00131073	0.0116374	-1.62914
KPNA7	-0.533286	-0.739948	-3.23152	0.00131215	0.011644	-1.63013
CARD8-AS1	0.239611	1.10292	3.23113	0.0013139	0.0116534	-1.63134
CYSRT1	0.713691	3.6137	3.23081	0.00131535	0.0116602	-1.63235
CTR9	0.18842	5.73475	3.22974	0.00132019	0.011697	-1.6357
RP1-43E13.2	-0.333588	-1.97297	-3.22771	0.00132939	0.0117724	-1.64204
U91328.19	-0.417811	0.666689	-3.22731	0.00133122	0.0117808	-1.64329
NANP	-0.215545	3.16083	-3.22707	0.00133231	0.0117808	-1.64404
SMG7-AS1	-0.334992	-1.59102	-3.22705	0.00133241	0.0117808	-1.64411
UBA3	0.180336	5.09374	3.22514	0.00134115	0.011852	-1.65008
DLG4	-0.341912	2.41009	-3.22487	0.00134236	0.0118565	-1.6509
CCND3	0.226539	5.72507	3.22395	0.00134663	0.011888	-1.65379
BRE	-0.143052	4.85293	-3.22272	0.00135227	0.0119258	-1.65761
RUFY1	0.160924	5.29155	3.22272	0.00135231	0.0119258	-1.65763
PLK2	0.358135	6.17545	3.22249	0.00135334	0.0119287	-1.65833
C4orf32	0.295831	3.32737	3.22149	0.00135798	0.0119634	-1.66145
EXTL2	-0.276769	3.26808	-3.22057	0.00136225	0.0119948	-1.66431
FLNC	-0.751218	4.64518	-3.21908	0.0013692	0.0120498	-1.66896
CSF3R	0.491281	2.25118	3.21805	0.00137405	0.0120863	-1.67218
NES	-0.480482	5.47713	-3.21595	0.00138393	0.0121669	-1.67872
INIP	0.167727	4.54827	3.21435	0.00139151	0.0122249	-1.68369
PRR13P5	0.218196	-0.192987	3.21425	0.00139197	0.0122249	-1.684
SLMO1	-0.323354	1.23487	-3.21403	0.00139303	0.0122279	-1.68469
GPR3	-0.410059	0.0505574	-3.21292	0.00139831	0.012268	-1.68814
SCN2B	-0.656286	-1.29007	-3.21059	0.00140946	0.0123594	-1.69538
RP11-66B24.4	-0.342413	0.697487	-3.2096	0.00141422	0.0123948	-1.69846
ADAP2	0.336639	3.5566	3.20824	0.00142082	0.0124441	-1.7027
C10orf76	0.132784	5.06469	3.20813	0.0014213	0.0124441	-1.70301
TRIP4	0.129854	4.7327	3.20719	0.00142588	0.0124778	-1.70594
LZTR1	-0.198207	5.37556	-3.20667	0.00142841	0.0124935	-1.70756
PDZD7	-0.53295	-0.211555	-3.20622	0.0014306	0.0125062	-1.70895
NPAS1	-0.398189	0.28704	-3.2057	0.00143313	0.0125219	-1.71056
PMS2P1	-0.21478	2.53833	-3.20293	0.00144669	0.0126339	-1.71915
KIAA1715	-0.225178	5.23959	-3.20267	0.00144801	0.0126377	-1.71998
AKR7A2	-0.158817	5.02838	-3.20254	0.00144861	0.0126377	-1.72036
ALOX5AP	0.376462	3.28078	3.20158	0.00145336	0.0126726	-1.72334
LARP6	-0.396593	3.30572	-3.20122	0.00145516	0.0126818	-1.72447
ACBD5	0.21818	4.58352	3.20105	0.00145601	0.0126828	-1.725
FGFR1	-0.46089	4.73055	-3.20087	0.0014569	0.012684	-1.72555
LRP10	0.185717	7.74118	3.20067	0.00145787	0.012686	-1.72616
IGF2BP1	-1.09391	0.727196	-3.19904	0.00146597	0.01275	-1.73121
AC092066.1	-0.230006	2.33852	-3.19834	0.00146946	0.0127738	-1.73338
MACC1	0.540854	3.17462	3.19811	0.00147061	0.0127773	-1.7341
RP11-750H9.5	0.507801	-1.09839	3.19676	0.00147739	0.0128282	-1.73828
SPA17	0.258035	2.18279	3.19664	0.00147798	0.0128282	-1.73865
TP53INP1	0.258605	4.77954	3.19543	0.00148407	0.0128746	-1.7424
PPP1R36	-0.375011	-1.59928	-3.19465	0.00148801	0.0129021	-1.74481
RP11-783K16.13	-0.249355	0.391615	-3.1939	0.0014918	0.0129285	-1.74713
P2RY6	0.451746	2.7586	3.19264	0.00149819	0.0129772	-1.75102
MLF1	-0.635015	3.95598	-3.192	0.00150144	0.0129987	-1.753
ETFDH	0.183573	3.93502	3.19136	0.0015047	0.0130198	-1.75497
LINC01094	0.367753	1.23049	3.19122	0.0015054	0.0130198	-1.7554
MACROD1	-0.361368	3.4394	-3.19087	0.00150723	0.013029	-1.7565
JAM3	-0.356743	3.3994	-3.19012	0.00151106	0.0130546	-1.75881
RNF19B	0.203842	6.26834	3.18999	0.00151172	0.0130546	-1.75921
DYNLT1	0.183697	5.97889	3.1893	0.00151526	0.0130785	-1.76134
MRPL22	0.191801	4.1653	3.18895	0.00151705	0.0130818	-1.76242
RNF38	0.256082	4.73247	3.18893	0.00151718	0.0130818	-1.76249
C2CD4C	-0.530806	0.119822	-3.1887	0.00151832	0.0130851	-1.76318
SLC9B1	-0.302951	-1.62778	-3.18855	0.00151913	0.0130854	-1.76366
COL1A1	-0.58192	11.3644	-3.18763	0.00152384	0.0131193	-1.76648
LINC01572	-0.355901	-0.296533	-3.1871	0.00152661	0.0131366	-1.76814
SECISBP2	0.171933	4.89369	3.18644	0.00153004	0.0131594	-1.77018
L3MBTL4	0.697957	1.00905	3.18531	0.00153589	0.013203	-1.77366
TMEM8A	-0.199715	5.76395	-3.18477	0.00153871	0.0132206	-1.77533
NSD1	0.249624	6.31448	3.18399	0.00154277	0.0132489	-1.77773
SPRED3	-0.345412	1.10722	-3.183	0.00154795	0.0132867	-1.78078
UCHL1	-0.80533	3.21711	-3.18259	0.00155008	0.0132982	-1.78203
HEXIM1	0.168849	5.64073	3.18201	0.00155311	0.0133175	-1.78381
GNB4	0.309817	5.13565	3.18039	0.00156168	0.0133843	-1.78883
RP9P	-0.255003	1.67895	-3.17993	0.00156412	0.0133984	-1.79025
PPHLN1	0.131407	5.38387	3.17958	0.00156595	0.0134074	-1.79131
ACTR3B	-0.26845	2.01488	-3.17884	0.00156987	0.0134341	-1.79358
FAXC	-0.676029	1.19951	-3.17731	0.00157799	0.0134925	-1.79828
WDR25	0.193973	3.02546	3.17726	0.00157827	0.0134925	-1.79845
CDK7	0.171836	4.65282	3.17702	0.00157957	0.0134968	-1.79919
P2RX5	0.505025	-0.0744659	3.17632	0.0015833	0.0135219	-1.80134
FAM228B	-0.271746	0.890485	-3.17556	0.0015874	0.0135501	-1.80369
IPO5	-0.190219	7.0928	-3.17502	0.00159025	0.0135677	-1.80533
MMP11	-0.670324	5.77603	-3.17481	0.0015914	0.0135707	-1.80599
PI4K2B	0.149728	-0.558163	3.17456	0.00159273	0.0135752	-1.80675
[truncated: 15,039 more rows]

## Sheet: C2-C3
	logFC	AveExpr	t	P.Value	adj.P.Val	B
CD79A	-4.05114	1.9088	-16.139	1.66018e-47	2.82861e-43	97.1238
MZB1	-3.87388	2.66774	-15.2579	1.84098e-43	1.56833e-39	87.9277
NUGGC	-2.90886	-1.23827	-14.9308	5.57492e-42	3.16619e-38	84.5604
KIAA0125	-3.62787	-0.75893	-14.6055	1.6133e-40	6.87187e-37	81.2381
IGJ	-4.19381	4.82902	-14.5208	3.85177e-40	1.31253e-36	80.379
ANKRD36BP2	-3.41049	-0.830764	-14.11	2.56125e-38	6.57143e-35	76.2357
PIM2	-1.87846	4.41135	-14.0996	2.84571e-38	6.57143e-35	76.1317
IGLV1-51	-4.4724	2.90194	-14.0916	3.08554e-38	6.57143e-35	76.0519
IGKC	-4.29076	8.69283	-13.9475	1.32822e-37	2.07894e-34	74.611
IGLL5	-4.49866	3.76228	-13.9466	1.3405e-37	2.07894e-34	74.6019
IGLV3-1	-4.70764	2.03376	-13.9464	1.34219e-37	2.07894e-34	74.6007
IGKV1-5	-4.53627	4.1119	-13.8774	2.69334e-37	3.8241e-34	73.9132
CD19	-3.2075	-0.90815	-13.8244	4.59309e-37	6.01977e-34	73.3864
FCRL5	-3.89277	0.318331	-13.7021	1.56973e-36	1.91037e-33	72.1734
IGLC2	-4.03618	5.48871	-13.6904	1.76439e-36	2.00412e-33	72.0581
IGLV3-19	-4.76304	2.59448	-13.6548	2.52107e-36	2.68462e-33	71.7058
IGHA1	-4.4904	7.86734	-13.5897	4.83533e-36	4.84614e-33	71.0631
IGLC3	-4.10099	4.77133	-13.5525	7.00936e-36	6.63475e-33	70.6966
IGHV3-53	-4.56755	0.00229444	-13.5225	9.45029e-36	8.47443e-33	70.4017
CD27	-2.47569	1.71247	-13.4988	1.19643e-35	1.01924e-32	70.1689
POU2AF1	-2.92859	2.55882	-13.4767	1.49198e-35	1.21049e-32	69.9511
IGKV3-11	-4.2259	4.5406	-13.3999	3.19808e-35	2.47676e-32	69.1986
CD79B	-2.23776	1.04773	-13.3662	4.47029e-35	3.31152e-32	68.8681
IGKV4-1	-4.45718	4.21421	-13.2814	1.0346e-34	7.34482e-32	68.04
IGLV2-11	-4.57582	2.11591	-13.2412	1.53804e-34	1.0482e-31	67.6488
DERL3	-2.66595	3.26426	-13.1558	3.57032e-34	2.33966e-31	66.8178
IGLV4-69	-4.64819	1.08121	-13.1196	5.09776e-34	3.21688e-31	66.4663
IGKV1-6	-4.52025	0.78025	-13.1122	5.4788e-34	3.33385e-31	66.3952
FAM46C	-2.46753	3.26989	-13.0973	6.34666e-34	3.72877e-31	66.2501
IGKV1-16	-4.66604	0.895856	-13.0727	8.07682e-34	4.58709e-31	66.0122
IGHV1-69	-4.63946	-0.0386164	-13.0454	1.05543e-33	5.80077e-31	65.7483
IGHV1-46	-4.5532	1.83306	-13.0314	1.21039e-33	6.44458e-31	65.6131
MEI1	-2.75414	1.20922	-12.987	1.86995e-33	9.65463e-31	65.1839
IGLV2-23	-4.46543	2.98651	-12.9795	2.0124e-33	1.00845e-30	65.1115
IGKV3-15	-4.14947	2.77037	-12.9469	2.7649e-33	1.34595e-30	64.798
IGLV3-25	-4.45937	2.73622	-12.9438	2.85112e-33	1.34937e-30	64.7677
IGHV3-74	-4.37636	1.62161	-12.9267	3.36772e-33	1.55079e-30	64.6034
MS4A1	-3.8973	-0.583755	-12.8864	4.99174e-33	2.13996e-30	64.2152
LAX1	-2.57016	0.313826	-12.886	5.01043e-33	2.13996e-30	64.2115
IGLV2-8	-4.54667	1.11597	-12.8857	5.02397e-33	2.13996e-30	64.2088
IGKV3D-20	-4.30096	-0.316789	-12.8379	8.00313e-33	3.32579e-30	63.7494
IGHG2	-4.02079	7.16774	-12.8166	9.84455e-33	3.99361e-30	63.5451
IGHV3-30	-4.24285	2.19844	-12.8039	1.11338e-32	4.41158e-30	63.4237
IGKV3-20	-4.12936	4.45045	-12.7941	1.224e-32	4.73966e-30	63.3303
IGHG3	-3.92176	6.41118	-12.7822	1.37439e-32	5.20376e-30	63.2159
IGHV5-51	-4.57712	3.04531	-12.7404	2.06065e-32	7.63247e-30	62.8164
IGLV1-47	-4.3794	2.18278	-12.7201	2.50955e-32	9.09738e-30	62.6219
IGHGP	-3.9049	3.89379	-12.7087	2.80013e-32	9.93929e-30	62.5139
IGHV1-2	-4.71915	1.45321	-12.6421	5.33099e-32	1.82563e-29	61.8787
IGLV3-21	-4.52846	3.77417	-12.6416	5.35753e-32	1.82563e-29	61.8738
IGHG1	-3.99124	9.52793	-12.6373	5.58184e-32	1.86477e-29	61.8333
IGLV7-46	-4.13528	-0.133974	-12.5925	8.60087e-32	2.81811e-29	61.4068
IGLV7-43	-4.30279	-0.319115	-12.5752	1.01584e-31	3.26564e-29	61.2426
IGLV6-57	-4.32111	2.17613	-12.5676	1.0928e-31	3.44798e-29	61.1706
IGHM	-4.00454	5.16447	-12.5608	1.1662e-31	3.61268e-29	61.1065
IGLV3-9	-4.51015	-0.147502	-12.5479	1.32046e-31	4.01749e-29	60.9839
IGLV2-14	-4.27204	3.28005	-12.532	1.53814e-31	4.59769e-29	60.8334
IGLV3-10	-4.73023	0.862894	-12.5271	1.61317e-31	4.73883e-29	60.7864
IKZF3	-2.48955	2.99742	-12.5145	1.81996e-31	5.25568e-29	60.6675
IGHV1-18	-4.4512	2.75901	-12.5055	1.98477e-31	5.63609e-29	60.5819
IGHV4-59	-4.39012	2.18203	-12.4984	2.12482e-31	5.93486e-29	60.5147
IGKV1-17	-4.43826	0.830461	-12.4768	2.61358e-31	7.18228e-29	60.3105
IGHV4-31	-4.34711	0.693197	-12.4539	3.25322e-31	8.79814e-29	60.0945
IGHA2	-4.54858	5.28576	-12.4458	3.51663e-31	9.36192e-29	60.0177
IGHV3-11	-4.38224	1.7244	-12.4138	4.77341e-31	1.25122e-28	59.7163
IGHV3-48	-4.19514	0.0542116	-12.4111	4.90209e-31	1.26548e-28	59.6901
IGLV1-44	-4.31395	2.57692	-12.3975	5.57789e-31	1.41845e-28	59.5627
IGHV1-24	-4.50368	1.25711	-12.3908	5.94694e-31	1.49006e-28	59.4995
IGKV1-9	-4.35784	1.55396	-12.3016	1.39235e-30	3.43808e-28	58.6605
IGLV1-40	-4.2119	3.30166	-12.2636	1.99781e-30	4.86267e-28	58.3044
IGHV3-15	-4.31502	2.09726	-12.2069	3.42227e-30	8.21249e-28	57.7736
IRF4	-2.2377	1.92722	-12.172	4.7602e-30	1.12645e-27	57.4481
IGHV3-49	-4.28018	0.996157	-12.0694	1.25475e-29	2.92855e-27	56.4923
IGHV3-33	-4.15376	1.27834	-12.047	1.54836e-29	3.56499e-27	56.285
LY9	-2.31421	0.279465	-11.9989	2.43469e-29	5.53096e-27	55.8387
IGKV1-27	-4.28581	0.665747	-11.9928	2.57728e-29	5.77786e-27	55.7826
IGHV3-23	-4.01443	3.35531	-11.9878	2.70038e-29	5.97521e-27	55.7366
IGHV3-21	-4.31474	1.919	-11.9849	2.77592e-29	6.0636e-27	55.7094
IGHV2-26	-4.40073	-0.393566	-11.9382	4.30097e-29	9.27593e-27	55.2776
CPNE5	-1.44973	2.03196	-11.847	1.00776e-28	2.13503e-26	54.4381
IGHV4-39	-4.32282	2.69447	-11.8463	1.01501e-28	2.13503e-26	54.431
IGHV1-69-2	-4.32422	1.58958	-11.8177	1.32511e-28	2.75333e-26	54.1682
IGHV3-73	-4.43382	-0.011054	-11.8051	1.48972e-28	3.05805e-26	54.0527
GPR55	-1.96774	-0.933983	-11.7655	2.15217e-28	4.36532e-26	53.69
IGHG4	-4.08603	6.03798	-11.7236	3.17666e-28	6.36753e-26	53.3062
KLRB1	-2.03552	-0.0513322	-11.676	4.93444e-28	9.77594e-26	52.872
IGHV4-34	-3.94623	1.57224	-11.6258	7.84793e-28	1.53693e-25	52.4146
IGKV2-24	-4.06235	0.111381	-11.6167	8.53357e-28	1.65221e-25	52.3321
RP11-284N8.3	-2.58549	-0.729491	-11.5916	1.07514e-27	2.05824e-25	52.1043
MAP4K1	-1.82071	2.32157	-11.5779	1.22015e-27	2.30987e-25	51.9796
IGHD	-4.39982	0.603593	-11.4683	3.33709e-27	6.24806e-25	50.9879
HSH2D	-1.83101	2.01233	-11.418	5.28547e-27	9.78846e-25	50.5347
2019-09-01	-1.52237	2.43715	-11.411	5.63375e-27	1.03213e-24	50.4718
LRMP	-2.08822	1.3439	-11.3019	1.52085e-26	2.75663e-24	49.4931
SLAMF6	-2.20818	1.09608	-11.1494	6.03982e-26	1.08323e-23	48.1342
TBC1D10C	-1.77297	2.19536	-10.8244	1.10022e-24	1.95267e-22	45.2751
ATP2A3	-1.44061	4.57418	-10.8171	1.17383e-24	2.06183e-22	45.2114
IGLV8-61	-4.15248	-0.018555	-10.7562	2.00894e-24	3.49268e-22	44.6822
ABCD2	-2.15401	-1.49934	-10.7544	2.04179e-24	3.51395e-22	44.6662
SEC11C	-0.873903	4.51571	-10.7485	2.15095e-24	3.66479e-22	44.6149
TNFRSF13C	-1.92053	0.823924	-10.7244	2.66011e-24	4.48743e-22	44.4057
TLR10	-2.08669	-0.59245	-10.6093	7.29588e-24	1.2187e-21	43.4121
RAB37	-1.50132	0.249226	-10.4186	3.83074e-23	6.33672e-21	41.7794
FLT3	-1.9476	-1.10836	-10.4143	3.97562e-23	6.51313e-21	41.7429
PCED1B-AS1	-1.57918	1.43744	-10.4031	4.37791e-23	7.03787e-21	41.648
GPR114	-2.08495	0.694519	-10.4031	4.37853e-23	7.03787e-21	41.6479
SCML4	-2.24558	-1.30049	-10.3818	5.26288e-23	8.38027e-21	41.4668
MMP9	1.90417	6.50795	10.3621	6.23279e-23	9.8328e-21	41.3003
LINC00426	-1.81139	-1.0701	-10.3605	6.32019e-23	9.87922e-21	41.2866
RAB39B	-1.94182	-1.34661	-10.2452	1.7015e-22	2.63547e-20	40.3118
GRAP2	-1.67175	0.855729	-10.2055	2.38797e-22	3.66542e-20	39.9783
SKAP1	-1.84358	1.0391	-10.1697	3.23964e-22	4.92831e-20	39.6781
CTA-292E10.9	-1.03841	1.38223	-10.1555	3.65484e-22	5.51073e-20	39.5595
ITGA5	1.42273	7.24467	10.1226	4.83582e-22	7.22743e-20	39.2839
CD3G	-1.89799	1.28121	-10.0775	7.08239e-22	1.0493e-19	38.9085
JAKMIP1	-1.93126	-0.65674	-10.0442	9.39059e-22	1.37928e-19	38.6309
SPIB	-2.73899	-0.204972	-10.0362	1.00467e-21	1.46305e-19	38.5645
BTLA	-1.91105	-1.26052	-10.0056	1.29956e-21	1.87644e-19	38.3113
TMEM156	-1.61497	-0.397606	-9.93305	2.39187e-21	3.4246e-19	37.7112
CD3D	-1.76993	2.18651	-9.92596	2.53826e-21	3.60391e-19	37.6527
TRBC2	-1.8397	3.22531	-9.91389	2.8084e-21	3.9545e-19	37.5533
NLRC3	-1.4749	1.6656	-9.88725	3.50949e-21	4.90121e-19	37.334
IPCEF1	-1.46945	0.581759	-9.86162	4.34733e-21	6.02193e-19	37.1235
P2RX1	-1.60213	-0.222582	-9.84585	4.95839e-21	6.81299e-19	36.9941
CD8A	-2.07558	2.68391	-9.83555	5.4025e-21	7.36382e-19	36.9097
CCL19	-2.71908	1.86272	-9.80383	7.03456e-21	9.51229e-19	36.6501
INHBA	2.0951	6.11868	9.80114	7.19347e-21	9.65058e-19	36.6282
GZMM	-1.97376	-0.319271	-9.77618	8.85027e-21	1.17805e-18	36.4243
ICAM3	-1.77668	0.366662	-9.75581	1.04785e-20	1.38397e-18	36.2583
FCRL3	-2.31733	-0.655532	-9.75425	1.06149e-20	1.39121e-18	36.2455
CD3E	-1.6499	3.44083	-9.74805	1.11741e-20	1.45332e-18	36.195
SERPINE1	1.84738	7.76794	9.73298	1.26587e-20	1.63393e-18	36.0724
CYP4X1	-2.60845	1.39888	-9.71625	1.45363e-20	1.86218e-18	35.9364
NPM1P25	-1.4403	-0.953882	-9.69863	1.68138e-20	2.13786e-18	35.7933
TRAT1	-2.39617	-1.36083	-9.69643	1.7122e-20	2.16093e-18	35.7754
GZMH	-2.31162	0.760694	-9.66787	2.1667e-20	2.71443e-18	35.5439
UBASH3A	-1.81768	0.0637458	-9.66314	2.25282e-20	2.80172e-18	35.5056
CMAHP	-1.47487	1.477	-9.64517	2.61165e-20	3.22444e-18	35.3603
AC007879.7	1.67671	1.04179	9.62907	2.98115e-20	3.65416e-18	35.2302
CAMK2N1	1.48348	3.99098	9.61631	3.31038e-20	4.02874e-18	35.1272
SLAMF1	-1.59545	0.844561	-9.61144	3.44546e-20	4.16339e-18	35.0879
ST6GAL1	-1.66717	4.48001	-9.60694	3.575e-20	4.2895e-18	35.0516
DENND1C	-0.97005	3.65418	-9.602	3.7227e-20	4.43548e-18	35.0118
ZAP70	-1.72107	1.97841	-9.58405	4.31256e-20	5.1026e-18	34.8672
ZNF831	-2.11271	-0.431467	-9.55883	5.30064e-20	6.22843e-18	34.6644
SIT1	-1.76645	0.572557	-9.54881	5.75281e-20	6.71345e-18	34.5839
PLAC8	-2.5496	1.91659	-9.52878	6.77471e-20	7.85221e-18	34.4232
SH2D1A	-1.88575	0.313118	-9.51065	7.85389e-20	9.04153e-18	34.2779
CD2	-1.70356	3.10054	-9.50008	8.55956e-20	9.74947e-18	34.1933
GNG7	-1.38917	0.766919	-9.49974	8.58329e-20	9.74947e-18	34.1906
GZMK	-2.37106	0.211644	-9.47113	1.08315e-19	1.22216e-17	33.9619
TRGC2	-2.01542	-0.974969	-9.46977	1.09519e-19	1.22762e-17	33.9511
CD6	-1.50703	2.65651	-9.46628	1.12667e-19	1.25465e-17	33.9232
CXCR3	-2.01006	0.896483	-9.41882	1.65534e-19	1.83141e-17	33.5451
FAM3B	-3.5438	0.19318	-9.40799	1.80687e-19	1.98615e-17	33.459
TRBV28	-1.80188	1.52027	-9.3519	2.84115e-19	3.10305e-17	33.0142
FCRLA	-2.0271	-0.390864	-9.33159	3.3456e-19	3.63073e-17	32.8536
CD180	-1.55492	1.1399	-9.33079	3.36729e-19	3.63114e-17	32.8473
PARP15	-1.66136	-0.0783403	-9.32612	3.49601e-19	3.74623e-17	32.8104
ADAM28	-1.87796	2.16786	-9.29824	4.37327e-19	4.65698e-17	32.5905
ABCB1	-1.5131	0.272247	-9.29354	4.54124e-19	4.80581e-17	32.5534
SIRPG	-1.82881	0.810191	-9.27742	5.1676e-19	5.43491e-17	32.4265
PPP1R16B	-1.467	2.77989	-9.25002	6.43438e-19	6.72571e-17	32.2111
ZBP1	-1.87828	1.45829	-9.23854	7.05217e-19	7.32651e-17	32.121
CD96	-1.45797	2.16051	-9.23485	7.26324e-19	7.50007e-17	32.092
ARHGAP15	-1.27565	1.49904	-9.22947	7.58174e-19	7.78179e-17	32.0499
PYHIN1	-1.74483	-0.171229	-9.22238	8.02349e-19	8.18588e-17	31.9943
ZMAT1	-2.00306	-0.341956	-9.16328	1.28418e-18	1.30237e-16	31.5322
TP53INP1	-0.851471	4.77954	-9.14131	1.52885e-18	1.54133e-16	31.361
CXCR6	-1.58767	1.93229	-9.14006	1.544e-18	1.54745e-16	31.3513
IKZF1	-1.58369	2.965	-9.13764	1.57394e-18	1.56823e-16	31.3324
GVINP1	-1.78811	0.675046	-9.11933	1.81955e-18	1.797e-16	31.19
RASAL3	-1.3169	2.69594	-9.11898	1.82463e-18	1.797e-16	31.1872
C5orf56	-1.27175	1.2824	-9.11052	1.95097e-18	1.91038e-16	31.1215
UBD	-2.40844	1.64076	-9.0979	2.15565e-18	2.09874e-16	31.0235
FASLG	-2.05362	-0.816817	-9.09326	2.23616e-18	2.16476e-16	30.9875
TESPA1	-1.47538	0.47441	-9.08429	2.40024e-18	2.31047e-16	30.918
HLA-DOB	-1.21906	1.60434	-9.05901	2.92997e-18	2.80454e-16	30.7221
METTL7A	-1.53885	4.03473	-9.03949	3.41663e-18	3.2521e-16	30.5712
CD5	-1.65046	2.04069	-9.03242	3.61178e-18	3.41875e-16	30.5167
CCDC125	-0.802115	2.79808	-9.02525	3.82134e-18	3.59713e-16	30.4613
RLTPR	-1.33601	1.18349	-9.00292	4.55366e-18	4.26293e-16	30.2891
AKNA	-1.00673	4.65707	-8.95426	6.66511e-18	6.20547e-16	29.9151
SLAMF7	-1.5244	3.90909	-8.93888	7.5161e-18	6.95975e-16	29.7971
RIC3	-2.13953	-1.2879	-8.9254	8.34962e-18	7.66699e-16	29.6939
RGL4	-1.19852	-0.81608	-8.92499	8.37605e-18	7.66699e-16	29.6908
RP11-1094M14.8	-1.76027	-1.35376	-8.92396	8.44411e-18	7.66699e-16	29.6828
GPR171	-1.65074	-0.274794	-8.92322	8.49248e-18	7.66699e-16	29.6772
SPNS3	-1.41027	-1.39457	-8.92257	8.53586e-18	7.66699e-16	29.6722
RP11-876N24.3	-1.50739	0.345686	-8.92236	8.54988e-18	7.66699e-16	29.6706
BANK1	-1.58115	0.483441	-8.91736	8.88938e-18	7.9297e-16	29.6324
GIMAP7	-1.38496	2.01134	-8.91294	9.20095e-18	8.16489e-16	29.5986
PDCD1	-1.70883	0.803716	-8.88303	1.1612e-17	1.0251e-15	29.3701
NAPSB	-1.59351	1.99279	-8.87382	1.24734e-17	1.09547e-15	29.2999
NKG7	-1.81633	2.31291	-8.87163	1.26869e-17	1.10851e-15	29.2832
APCDD1L	2.14293	1.53737	8.86926	1.29232e-17	1.12339e-15	29.2651
ARHGAP9	-1.25915	2.76414	-8.86591	1.32627e-17	1.14705e-15	29.2397
TXK	-1.33064	-1.2596	-8.85737	1.41713e-17	1.21945e-15	29.1746
ITGAL	-1.6345	3.39488	-8.85015	1.49871e-17	1.28317e-15	29.1197
MFAP2	1.2415	5.5102	8.82851	1.77221e-17	1.50975e-15	28.9552
CLEC2D	-1.17678	2.29046	-8.82444	1.82895e-17	1.55033e-15	28.9242
BZRAP1	-1.6908	1.5062	-8.79978	2.21278e-17	1.8611e-15	28.7373
BCL2L14	-1.83971	-0.405341	-8.79951	2.21742e-17	1.8611e-15	28.7352
ZC3H12D	-1.34101	0.597017	-8.79029	2.38093e-17	1.98854e-15	28.6654
CD247	-1.49069	2.0524	-8.77366	2.70664e-17	2.23936e-15	28.5395
COLCA1	-2.63264	-0.150856	-8.77362	2.70753e-17	2.23936e-15	28.5392
CCR7	-1.65825	1.86898	-8.75027	3.24047e-17	2.66721e-15	28.3629
TAGAP	-1.43126	2.22744	-8.73887	3.53708e-17	2.89735e-15	28.277
RHOH	-1.33549	1.92297	-8.73821	3.55498e-17	2.89808e-15	28.272
SCG5	1.45068	1.16069	8.73027	3.77872e-17	3.0658e-15	28.2121
CYTIP	-1.31993	2.86103	-8.7156	4.22865e-17	3.41459e-15	28.1017
HLF	-2.159	1.80621	-8.70286	4.6625e-17	3.74716e-15	28.0059
OR2I1P	-2.38651	1.18793	-8.68849	5.20448e-17	4.1631e-15	27.898
GLCCI1	-1.05277	2.54138	-8.67777	5.649e-17	4.49756e-15	27.8176
SMPDL3B	-1.78827	0.983654	-8.67391	5.81838e-17	4.61086e-15	27.7886
RP3-395M20.8	-1.3105	-0.0636884	-8.65373	6.78734e-17	5.35382e-15	27.6375
THEMIS	-1.99239	-0.474524	-8.65309	6.82043e-17	5.35514e-15	27.6327
SASH3	-1.36273	3.32161	-8.64868	7.05372e-17	5.5129e-15	27.5997
PLAU	1.19032	7.86256	8.64031	7.51839e-17	5.84924e-15	27.5371
TRG-AS1	-1.51927	-0.562489	-8.63931	7.57624e-17	5.86745e-15	27.5296
SEMA4D	-0.974432	5.00034	-8.63725	7.69606e-17	5.93328e-15	27.5142
CEACAM21	-1.37743	-0.400562	-8.60512	9.82713e-17	7.5421e-15	27.2745
SEMA3C	1.47858	5.96818	8.60433	9.88605e-17	7.5533e-15	27.2686
MGAT3	-1.95269	1.38539	-8.59288	1.07843e-16	8.20284e-15	27.1833
RP11-65J21.3	1.3398	-0.0368759	8.59092	1.0946e-16	8.2888e-15	27.1687
TM4SF19	1.81705	1.82194	8.58913	1.10952e-16	8.36461e-15	27.1554
FSCN1	0.825445	9.21951	8.58426	1.15131e-16	8.64143e-15	27.1191
CD226	-1.40604	0.374265	-8.56767	1.30554e-16	9.75604e-15	26.9958
SLA2	-1.5212	1.16495	-8.55787	1.40616e-16	1.0462e-14	26.923
CD8B	-2.02023	0.192759	-8.55085	1.48282e-16	1.09845e-14	26.8709
SELL	-1.64038	2.561	-8.54515	1.54805e-16	1.13798e-14	26.8287
RORB	-2.3841	-1.00896	-8.54503	1.54955e-16	1.13798e-14	26.8278
SVIP	-1.72564	1.69327	-8.53979	1.61213e-16	1.17886e-14	26.7889
SPOCD1	1.48631	2.11373	8.5228	1.83281e-16	1.3345e-14	26.6631
RMND5B	-0.62466	4.75221	-8.51431	1.95391e-16	1.41662e-14	26.6004
CD48	-1.4886	2.56599	-8.47769	2.57413e-16	1.85839e-14	26.3301
ACAP1	-0.959512	3.34384	-8.4545	3.0639e-16	2.20265e-14	26.1593
FUT7	-1.43146	-0.333763	-8.45364	3.08372e-16	2.20758e-14	26.1529
GAPT	-1.58079	-1.08509	-8.4408	3.39514e-16	2.42035e-14	26.0586
RAMP3	-1.03389	2.96188	-8.43046	3.66863e-16	2.60442e-14	25.9827
TESC	-1.31852	0.105384	-8.42679	3.7708e-16	2.66585e-14	25.9557
PDE6B	-1.79683	-0.184161	-8.41958	3.97979e-16	2.80197e-14	25.9028
ID2	-1.09296	4.32343	-8.41818	4.02159e-16	2.81975e-14	25.8926
CORO1A	-1.12737	5.29009	-8.40812	4.33569e-16	3.02752e-14	25.8189
FRZB	-1.59113	0.965687	-8.38958	4.97945e-16	3.46285e-14	25.6832
TRAC	-1.42583	3.91986	-8.38602	5.11349e-16	3.54161e-14	25.6571
ACTN1	0.94141	8.66078	8.3745	5.57168e-16	3.84333e-14	25.573
P2RY10	-1.71998	-0.283951	-8.3419	7.10124e-16	4.87867e-14	25.3352
ASRGL1	-1.58436	0.564263	-8.3214	8.26779e-16	5.65729e-14	25.1861
TGFBI	1.53929	9.04478	8.3118	8.87798e-16	6.05052e-14	25.1163
ITK	-1.61099	1.44304	-8.29061	1.03851e-15	7.04944e-14	24.9627
NCF4	-1.05125	2.69125	-8.28249	1.10282e-15	7.45631e-14	24.9038
SELP	-2.0774	1.17747	-8.2795	1.12743e-15	7.59258e-14	24.8822
BCL2	-1.38247	2.79597	-8.27817	1.13852e-15	7.63255e-14	24.8726
SIDT1	-1.47386	1.26208	-8.27772	1.14233e-15	7.63255e-14	24.8693
LTA	-1.45268	-0.94516	-8.2724	1.18812e-15	7.90747e-14	24.8308
TNFRSF12A	1.02808	6.3121	8.26816	1.22592e-15	8.12734e-14	24.8001
ITM2A	-1.28391	2.39211	-8.26049	1.29723e-15	8.56676e-14	24.7447
BIN2	-1.23641	2.21664	-8.25853	1.31616e-15	8.65819e-14	24.7305
ARHGAP26	-1.12481	3.9512	-8.25355	1.36538e-15	8.94742e-14	24.6945
TRBV20-1	-1.80267	-1.32911	-8.25224	1.37866e-15	8.99986e-14	24.685
CIITA	-1.50454	3.98308	-8.25045	1.39689e-15	9.08403e-14	24.6722
RP13-463N16.6	1.77332	0.19708	8.23676	1.54509e-15	1.00096e-13	24.5733
KLF7	0.878868	5.63972	8.21537	1.80832e-15	1.16705e-13	24.4192
CD22	-1.56241	0.298988	-8.19067	2.16754e-15	1.39361e-13	24.2417
SMAP2	-0.587053	5.36936	-8.17043	2.51394e-15	1.61025e-13	24.0964
RP5-1171I10.5	-1.77578	-0.786485	-8.16581	2.60028e-15	1.65931e-13	24.0633
GZMB	-1.55813	2.80009	-8.16293	2.65563e-15	1.68831e-13	24.0427
SLC18B1	-0.730757	3.71732	-8.16232	2.66752e-15	1.68956e-13	24.0383
CFP	-1.2673	0.506321	-8.14869	2.9468e-15	1.85954e-13	23.9408
LINC00926	-1.30675	-0.720352	-8.14328	3.06555e-15	1.92734e-13	23.9021
IL18RAP	-1.45786	-0.548356	-8.13578	3.23791e-15	2.02822e-13	23.8485
RASGRP2	-1.11238	1.14744	-8.12898	3.40256e-15	2.12355e-13	23.7999
RALGPS1	-1.12553	2.13781	-8.12597	3.47803e-15	2.16273e-13	23.7784
EPB41L4A-AS2	-1.24951	-1.2522	-8.12341	3.54351e-15	2.19543e-13	23.7602
NCF1B	-1.2807	-0.941735	-8.11149	3.86477e-15	2.38579e-13	23.6752
ZNF683	-2.00678	-0.149315	-8.09938	4.22068e-15	2.5961e-13	23.5889
C11orf21	-1.55181	-1.2724	-8.09429	4.37974e-15	2.68424e-13	23.5527
RP11-42I10.1	1.13917	-1.12121	8.08752	4.60045e-15	2.8094e-13	23.5045
TXNDC11	-0.406109	5.55383	-8.08633	4.64035e-15	2.81739e-13	23.496
APOBEC3H	-1.39811	-0.939893	-8.08614	4.6466e-15	2.81739e-13	23.4947
VNN2	-1.64383	0.0869815	-8.07438	5.06067e-15	3.05758e-13	23.4111
FAM107A	-1.51474	0.809072	-8.06974	5.23382e-15	3.15102e-13	23.3782
ANKRD44	-1.10564	2.45593	-8.04955	6.05822e-15	3.63451e-13	23.2349
SPOCK2	-1.43781	4.38035	-8.04339	6.33419e-15	3.78673e-13	23.1913
KLRG1	-1.31005	-1.46438	-8.04134	6.42863e-15	3.82975e-13	23.1768
TIGIT	-1.45739	2.29918	-8.03697	6.63514e-15	3.93901e-13	23.1458
PMEPA1	1.19363	6.74098	8.02806	7.07614e-15	4.18622e-13	23.0828
RTN4	0.495197	8.2147	8.01792	7.61358e-15	4.48859e-13	23.0112
PARM1	-1.59715	3.27832	-8.0022	8.52739e-15	5.00999e-13	22.9002
NCF1C	-1.18096	0.12615	-7.99031	9.28958e-15	5.43903e-13	22.8163
DFNA5	1.11948	4.93278	7.98833	9.4229e-15	5.4982e-13	22.8024
REPIN1	-0.954372	5.27652	-7.98615	9.57141e-15	5.56579e-13	22.7871
BATF	-1.21488	1.95908	-7.98431	9.6992e-15	5.62092e-13	22.7741
GIMAP1	-1.13496	1.54958	-7.96034	1.15216e-14	6.63795e-13	22.6055
EOMES	-1.54074	0.196476	-7.96022	1.15321e-14	6.63795e-13	22.6046
ARHGAP30	-0.962915	4.32356	-7.95135	1.22892e-14	7.04993e-13	22.5424
BZRAP1-AS1	-1.28584	-1.43193	-7.92452	1.48929e-14	8.51493e-13	22.3543
MEIS1	-0.998641	3.39119	-7.91986	1.53976e-14	8.77406e-13	22.3217
RGS5	-0.804507	1.87134	-7.91427	1.60248e-14	9.10103e-13	22.2826
CD7	-1.29843	3.10209	-7.91331	1.61351e-14	9.13321e-13	22.2759
TMEM71	-1.33299	0.078457	-7.9052	1.70976e-14	9.64597e-13	22.2192
KB-1732A1.1	1.23715	1.19527	7.90013	1.77275e-14	9.96837e-13	22.1837
S1PR4	-1.28932	1.33537	-7.89376	1.85513e-14	1.03973e-12	22.1393
IL2RG	-1.33167	4.32255	-7.87946	2.05421e-14	1.14753e-12	22.0395
FBLIM1	0.848631	6.81762	7.87773	2.0796e-14	1.15791e-12	22.0275
RAB11FIP5	0.564351	5.68898	7.87559	2.11153e-14	1.17187e-12	22.0126
TBX21	-1.53502	-0.599859	-7.87373	2.1397e-14	1.18365e-12	21.9996
EAF2	-0.8703	1.56253	-7.86943	2.20617e-14	1.21646e-12	21.9697
RP11-693N9.2	-1.09564	-0.312236	-7.8522	2.49367e-14	1.37055e-12	21.8498
RASGRP1	-1.34297	2.9665	-7.84288	2.66425e-14	1.4596e-12	21.785
SLFN12L	-1.0613	-0.0611272	-7.83976	2.72379e-14	1.48743e-12	21.7634
CUL9	-0.74286	4.82469	-7.81619	3.21908e-14	1.75229e-12	21.5999
FAM3D	-2.56785	1.2373	-7.79869	3.64324e-14	1.97686e-12	21.4788
SNAI3	-1.01995	-0.0860293	-7.79494	3.74092e-14	2.02342e-12	21.4529
SERPINH1	0.878004	8.11097	7.79266	3.80164e-14	2.04976e-12	21.4372
CTC-231O11.1	-1.50078	-0.917857	-7.78563	3.99507e-14	2.14726e-12	21.3886
IKBKE	-0.693134	4.4928	-7.78057	4.14038e-14	2.21836e-12	21.3537
IL17RB	-1.26355	0.736559	-7.76819	4.51788e-14	2.41303e-12	21.2683
FSTL3	1.32949	5.16075	7.76241	4.7059e-14	2.5056e-12	21.2284
COL5A3	1.17829	5.97563	7.74797	5.20887e-14	2.76476e-12	21.1291
MICAL2	1.06225	5.79547	7.73864	5.56205e-14	2.94305e-12	21.0649
GCH1	-0.781491	3.92153	-7.73465	5.72018e-14	3.01735e-12	21.0375
PRKCB	-1.32794	2.1536	-7.73409	5.74285e-14	3.01996e-12	21.0336
HTRA1	1.03998	6.93358	7.71354	6.63345e-14	3.47756e-12	20.8926
ITGB7	-1.26682	1.61218	-7.71091	6.75654e-14	3.53122e-12	20.8746
CYFIP2	-1.18323	3.29057	-7.71017	6.79199e-14	3.5389e-12	20.8695
EVI2B	-1.2674	2.64072	-7.70171	7.20627e-14	3.74331e-12	20.8116
LINC00342	-1.40459	0.935223	-7.69505	7.55001e-14	3.90994e-12	20.766
RP11-417E7.1	1.61262	1.16841	7.69359	7.62744e-14	3.93807e-12	20.756
EHD2	0.753931	7.62249	7.68813	7.92419e-14	4.07892e-12	20.7187
LCK	-1.1702	3.03194	-7.6826	8.23676e-14	4.22705e-12	20.6809
DENND2D	-0.64733	4.60255	-7.66972	9.01205e-14	4.61103e-12	20.5929
DOCK8	-1.07083	3.91441	-7.66037	9.61879e-14	4.90673e-12	20.5292
KIR2DL4	-1.78376	-1.32734	-7.65359	1.00848e-13	5.12912e-12	20.4829
PODNL1	1.05314	3.14547	7.65122	1.02525e-13	5.19887e-12	20.4668
ADARB2	-2.22235	-1.16035	-7.65003	1.03376e-13	5.22647e-12	20.4587
GZMA	-1.66475	2.30506	-7.64847	1.04503e-13	5.26782e-12	20.4481
CYSLTR1	-1.24725	0.225106	-7.64211	1.09239e-13	5.4903e-12	20.4048
PCBD2	-0.593626	2.54281	-7.63341	1.16054e-13	5.81568e-12	20.3456
SNX20	-1.21034	2.21405	-7.62837	1.20189e-13	6.00523e-12	20.3113
KIF3C	0.893915	4.24123	7.61858	1.2865e-13	6.40916e-12	20.2448
CBX7	-1.02104	3.69024	-7.61548	1.31446e-13	6.5294e-12	20.2238
CST7	-1.15223	2.28973	-7.61388	1.32918e-13	6.58328e-12	20.2129
TJP3	-1.96326	1.65709	-7.61235	1.34336e-13	6.63427e-12	20.2025
LOXL2	1.14014	5.8722	7.59448	1.52044e-13	7.48706e-12	20.0815
KATNAL2	-1.38612	-0.146184	-7.59033	1.56481e-13	7.68337e-12	20.0534
TRAF3IP3	-1.01752	2.17706	-7.58126	1.6662e-13	8.15767e-12	19.992
FGD2	-1.02149	2.40601	-7.57862	1.69683e-13	8.28384e-12	19.9742
LINC00941	1.74789	0.553504	7.57383	1.75402e-13	8.53857e-12	19.9418
SAMD3	-1.52638	-1.37511	-7.56536	1.85967e-13	9.0271e-12	19.8846
IL16	-1.10691	3.06274	-7.5611	1.91519e-13	9.27016e-12	19.8558
EVA1A	1.45849	2.49989	7.55886	1.94504e-13	9.38798e-12	19.8407
TIFAB	-1.63761	-0.925092	-7.53883	2.23314e-13	1.07481e-11	19.7057
TSPAN32	-1.31336	-1.09699	-7.53511	2.29106e-13	1.09958e-11	19.6807
TRDC	-1.66155	-0.844807	-7.52921	2.38598e-13	1.14118e-11	19.641
WAS	-1.0864	2.80969	-7.52889	2.39114e-13	1.14118e-11	19.6389
ICA1	-1.3356	1.45439	-7.52454	2.4638e-13	1.17258e-11	19.6096
BTK	-1.0827	1.80632	-7.52321	2.4865e-13	1.17822e-11	19.6007
CXCL13	-1.65096	3.65945	-7.52303	2.48948e-13	1.17822e-11	19.5995
UBTD1	0.624215	4.12852	7.51422	2.64502e-13	1.24836e-11	19.5403
PTPRN	1.87577	-0.647284	7.50455	2.8266e-13	1.33037e-11	19.4754
SYT7	1.4206	3.98565	7.50021	2.91201e-13	1.36564e-11	19.4463
PVR	0.565615	5.60277	7.49993	2.91754e-13	1.36564e-11	19.4444
PLEC	0.742468	10.0351	7.49385	3.04174e-13	1.41987e-11	19.4037
GRAMD1C	-1.06483	2.07543	-7.49304	3.05865e-13	1.42386e-11	19.3983
NOSTRIN	-0.664612	0.690783	-7.48818	3.16231e-13	1.46811e-11	19.3657
SH2D4A	-0.843081	4.03309	-7.47219	3.52825e-13	1.63354e-11	19.2587
MATN3	1.44466	0.903907	7.4695	3.59373e-13	1.65935e-11	19.2407
SEMA4A	-0.62119	5.38909	-7.46797	3.63152e-13	1.67227e-11	19.2305
ING3	-0.635973	2.80519	-7.45765	3.89684e-13	1.7896e-11	19.1616
FGD3	-0.847155	3.40499	-7.44754	4.17532e-13	1.91234e-11	19.0942
SLAIN1	-1.54308	-0.293247	-7.44541	4.2364e-13	1.93512e-11	19.08
MYLIP	-1.07593	4.01266	-7.44003	4.39475e-13	2.00208e-11	19.0441
PIK3R3	-1.02973	4.02381	-7.43809	4.45336e-13	2.02337e-11	19.0312
CCR5	-1.40011	2.24829	-7.42071	5.01291e-13	2.26708e-11	18.9155
C4orf19	-2.0029	-0.575499	-7.42061	5.01638e-13	2.26708e-11	18.9149
CECR1	-1.32396	4.45865	-7.41622	5.16832e-13	2.32957e-11	18.8857
GOLGA2P5	-1.23055	1.17886	-7.41314	5.27762e-13	2.37256e-11	18.8653
RP1-193H18.2	-1.23325	-0.359995	-7.4086	5.44319e-13	2.43963e-11	18.8351
CHDH	-1.79777	0.355725	-7.40827	5.45545e-13	2.43963e-11	18.8329
TRPV6	-2.10368	-0.968118	-7.40706	5.50051e-13	2.45334e-11	18.8249
OXNAD1	-0.490055	3.03633	-7.40482	5.58469e-13	2.48072e-11	18.81
CCR4	-1.64405	0.458698	-7.40465	5.59101e-13	2.48072e-11	18.8089
PDIK1L	-0.652693	3.30206	-7.39931	5.79778e-13	2.56578e-11	18.7734
NCF1	-1.13751	1.07617	-7.39777	5.85855e-13	2.58596e-11	18.7633
CFAP54	-1.00533	-0.729154	-7.39699	5.8896e-13	2.59295e-11	18.7581
DCBLD1	0.881201	5.19598	7.3886	6.23445e-13	2.73769e-11	18.7025
RPSAP52	1.79088	-0.613246	7.38106	6.56173e-13	2.874e-11	18.6525
FAM222A	-1.11252	1.66543	-7.37436	6.86643e-13	2.99975e-11	18.6082
COLCA2	-1.76509	-0.164199	-7.36943	7.09904e-13	3.09344e-11	18.5757
ARSI	1.49503	4.22972	7.36482	7.32437e-13	3.18348e-11	18.5451
GIMAP5	-1.23543	-0.860249	-7.36296	7.41718e-13	3.21562e-11	18.5328
FOXA1	-2.33995	1.80864	-7.36257	7.43646e-13	3.2158e-11	18.5303
FAM221A	-1.37635	0.235605	-7.36051	7.54101e-13	3.25275e-11	18.5167
IL21R	-1.34366	1.75899	-7.35991	7.57153e-13	3.25767e-11	18.5127
BLNK	-1.14045	3.44642	-7.34864	8.17044e-13	3.5065e-11	18.4384
CYP4B1	-2.57318	0.0174265	-7.34341	8.46433e-13	3.6235e-11	18.4039
JPH2	1.86348	1.4582	7.3399	8.6671e-13	3.701e-11	18.3807
NR3C2	-1.67775	-0.235357	-7.33222	9.1277e-13	3.88794e-11	18.3302
MYB	-1.59465	1.0825	-7.33072	9.22101e-13	3.91789e-11	18.3202
C4B	-1.61545	0.357878	-7.32918	9.31702e-13	3.94542e-11	18.3101
AFF3	-1.52338	-0.706559	-7.32894	9.3321e-13	3.94542e-11	18.3085
C19orf57	-1.11984	1.74681	-7.32668	9.47494e-13	3.99589e-11	18.2937
RASSF2	-1.09802	3.54449	-7.3187	9.99809e-13	4.20611e-11	18.2412
FER1L4	-1.42719	0.719518	-7.3176	1.00727e-12	4.22705e-11	18.234
ARHGAP4	-1.23369	4.27757	-7.31229	1.0439e-12	4.37e-11	18.1991
CERCAM	0.963722	5.85932	7.31175	1.04771e-12	4.37203e-11	18.1955
ACKR1	-1.86309	1.97302	-7.31149	1.04951e-12	4.37203e-11	18.1938
FAM65B	-1.22496	1.94191	-7.30666	1.08423e-12	4.50563e-11	18.1621
NOS2	-2.132	-0.0467978	-7.30531	1.0941e-12	4.53559e-11	18.1532
RP11-747H7.3	-1.36523	-0.568725	-7.30386	1.10482e-12	4.56893e-11	18.1437
TMPRSS2	-2.65463	1.3021	-7.30344	1.10795e-12	4.57077e-11	18.1409
SYK	-0.835624	5.87163	-7.30248	1.11512e-12	4.58922e-11	18.1346
PLAUR	0.774582	5.82494	7.30017	1.13254e-12	4.6497e-11	18.1195
TNFSF8	-1.40339	-0.505116	-7.29867	1.14399e-12	4.6854e-11	18.1097
ITGAE	-0.681756	3.93882	-7.29709	1.15624e-12	4.72421e-11	18.0993
PIGR	-3.26722	0.743536	-7.29164	1.1993e-12	4.88846e-11	18.0636
LTF	-3.26749	2.00796	-7.28803	1.22873e-12	4.99643e-11	18.0399
PAOX	-0.562198	2.90597	-7.28495	1.25442e-12	5.08875e-11	18.0197
RP11-35G9.3	-0.781326	-0.36298	-7.28261	1.27421e-12	5.15676e-11	18.0044
SP140	-1.30803	1.47685	-7.2814	1.28456e-12	5.18633e-11	17.9965
SSR4	-0.577301	6.99769	-7.26691	1.41559e-12	5.70185e-11	17.9017
UCP2	-1.08347	5.16924	-7.26105	1.47216e-12	5.91572e-11	17.8634
FKBP11	-0.692827	4.48071	-7.26041	1.47853e-12	5.92734e-11	17.8592
AC116366.6	-1.14399	-0.841301	-7.25833	1.49922e-12	5.99619e-11	17.8456
APOBEC3D	-1.20305	1.81157	-7.25434	1.53973e-12	6.14377e-11	17.8196
PRDM15	-0.582193	3.45556	-7.24487	1.64032e-12	6.52987e-11	17.7578
PTPN18	-0.676962	4.97728	-7.24252	1.66631e-12	6.61785e-11	17.7425
HMHA1	-0.699294	4.93168	-7.24204	1.67167e-12	6.62371e-11	17.7394
TNFRSF14	-0.832956	4.68261	-7.2368	1.73122e-12	6.84374e-11	17.7052
CD244	-1.17864	-0.254968	-7.23291	1.77666e-12	7.00711e-11	17.6799
PPFIBP2	-0.893429	4.64211	-7.22374	1.88867e-12	7.43166e-11	17.6202
SFXN2	-0.843196	2.56137	-7.22309	1.89691e-12	7.4469e-11	17.616
MAP4K4	0.5455	7.5543	7.22169	1.91466e-12	7.49931e-11	17.6069
MSX2	1.36174	1.59661	7.21614	1.98677e-12	7.76391e-11	17.5708
TMEM150C	-1.28752	1.91112	-7.21307	2.02788e-12	7.90641e-11	17.5508
YPEL1	-1.22533	-0.590911	-7.2127	2.03279e-12	7.90746e-11	17.5485
GMPPB	-0.417791	4.39727	-7.21234	2.03768e-12	7.90844e-11	17.5461
S100A10	0.662486	8.88587	7.21157	2.04823e-12	7.93132e-11	17.5411
HERPUD1	-0.577196	6.16983	-7.20943	2.07754e-12	8.02654e-11	17.5272
FHL2	0.804959	6.2412	7.20309	2.16706e-12	8.35349e-11	17.486
SNX22	-0.789689	0.986155	-7.20061	2.20301e-12	8.47288e-11	17.47
INF2	0.535919	6.93084	7.19596	2.27219e-12	8.71926e-11	17.4398
PASK	-0.744466	3.17836	-7.19199	2.33289e-12	8.9321e-11	17.4141
AMICA1	-1.17154	2.88909	-7.18859	2.38617e-12	9.1156e-11	17.392
ZNF540	-1.14645	-1.38751	-7.18704	2.41083e-12	9.17127e-11	17.382
SYCP2	-2.031	0.723924	-7.187	2.41151e-12	9.17127e-11	17.3817
TUBB6	0.723954	7.71704	7.18583	2.43036e-12	9.22239e-11	17.3741
ACTB	0.353663	12.493	7.18252	2.48426e-12	9.40596e-11	17.3527
TVP23A	-0.866405	-0.652061	-7.18168	2.49823e-12	9.43789e-11	17.3472
IL10RA	-1.12014	3.77336	-7.17886	2.54534e-12	9.5946e-11	17.329
ICAM2	-0.918367	1.57198	-7.17731	2.57167e-12	9.67244e-11	17.319
CHPF	0.719878	7.13697	7.17406	2.62769e-12	9.86137e-11	17.2979
RCSD1	-1.06259	2.80693	-7.14122	3.26535e-12	1.22275e-10	17.0859
FAP	1.4045	3.87958	7.12916	3.53599e-12	1.32119e-10	17.0082
USP30-AS1	-1.42857	-0.862552	-7.12174	3.71326e-12	1.38439e-10	16.9605
IRF8	-1.2328	2.9613	-7.11432	3.89919e-12	1.45053e-10	16.9128
ACSM3	-1.08319	-0.296643	-7.11292	3.93533e-12	1.46079e-10	16.9038
FAM13B	-0.713377	3.75851	-7.11143	3.97432e-12	1.47205e-10	16.8942
FN1	1.68736	9.74054	7.10105	4.25503e-12	1.57261e-10	16.8276
FICD	-0.586573	2.08709	-7.09815	4.33699e-12	1.59943e-10	16.809
FAM83E	-1.65509	2.29584	-7.09293	4.48853e-12	1.65174e-10	16.7755
POPDC3	1.91348	1.44914	7.08799	4.63637e-12	1.70247e-10	16.7439
LGALS9	-1.06914	4.97898	-7.08488	4.73221e-12	1.73392e-10	16.724
SMIM5	-1.50166	1.1003	-7.07896	4.91966e-12	1.79874e-10	16.6861
ZMYND10	-1.19369	-1.56104	-7.0739	5.08536e-12	1.85534e-10	16.6538
LAG3	-1.3511	2.4623	-7.06944	5.23647e-12	1.90639e-10	16.6252
LAMC2	1.36251	9.73184	7.06898	5.25206e-12	1.90799e-10	16.6223
LINC00324	-0.813194	0.858034	-7.0651	5.38751e-12	1.95303e-10	16.5975
LTB	-1.16681	2.56805	-7.06422	5.41864e-12	1.96014e-10	16.5918
RND1	-1.17514	0.967424	-7.06214	5.49276e-12	1.98275e-10	16.5786
GNA14	-1.01765	-0.622659	-7.0617	5.50866e-12	1.98428e-10	16.5758
KIRREL	0.947157	5.9465	7.05985	5.5758e-12	2.00423e-10	16.564
N4BP2L1	-0.974146	2.02463	-7.05129	5.89698e-12	2.11521e-10	16.5093
CD52	-1.17848	3.17167	-7.04977	5.95574e-12	2.1318e-10	16.4997
FNBP1	-0.620777	5.11308	-7.04858	6.0025e-12	2.14404e-10	16.492
MUC4	-2.76599	2.81574	-7.0468	6.07284e-12	2.16462e-10	16.4807
ECHDC2	-0.950647	4.06358	-7.04507	6.14187e-12	2.18466e-10	16.4696
SNAI2	0.724729	6.07089	7.04454	6.16322e-12	2.18768e-10	16.4663
CD28	-1.25159	0.891648	-7.03982	6.35606e-12	2.25145e-10	16.4362
CD37	-1.12182	3.16875	-7.0334	6.62795e-12	2.33961e-10	16.3954
CLEC10A	-1.41277	1.09635	-7.0333	6.63241e-12	2.33961e-10	16.3947
ABCA7	-0.752207	4.20235	-7.02928	6.80885e-12	2.39689e-10	16.3691
DOC2B	-1.53461	4.44039	-7.02643	6.93636e-12	2.43674e-10	16.351
MFAP5	1.87851	3.52072	7.02276	7.10432e-12	2.4906e-10	16.3277
PTPRN2	-1.09003	1.29255	-7.02215	7.13301e-12	2.49553e-10	16.3238
LMO4	-0.866066	5.67556	-7.02035	7.2171e-12	2.51977e-10	16.3123
LGALS1	0.984381	8.1531	7.01404	7.51972e-12	2.62006e-10	16.2723
CRTAM	-1.38324	-0.603268	-7.01361	7.54081e-12	2.62205e-10	16.2695
CD200R1	-1.15239	-0.0249697	-7.0114	7.6501e-12	2.65463e-10	16.2555
RP11-150O12.1	1.3844	2.46916	7.00938	7.75151e-12	2.68435e-10	16.2427
RP11-876N24.4	-0.882185	-0.693386	-7.00758	7.84283e-12	2.70745e-10	16.2312
WDFY4	-1.38153	2.3524	-7.00723	7.86102e-12	2.70745e-10	16.229
FUT6	-2.42709	0.626559	-7.00713	7.86588e-12	2.70745e-10	16.2284
CTB-36H16.2	-0.973396	-1.30229	-7.00669	7.88864e-12	2.70981e-10	16.2256
SUSD3	-1.06151	1.26224	-7.00556	7.94673e-12	2.72427e-10	16.2184
MPC1	-0.558373	3.87413	-7.00446	8.0038e-12	2.73833e-10	16.2114
TMC8	-0.936884	3.99996	-7.00242	8.11047e-12	2.76926e-10	16.1985
CYB561D2	-0.596051	0.742154	-6.99584	8.46496e-12	2.88452e-10	16.1568
STAG3	-1.76211	1.03175	-6.99234	8.66006e-12	2.94511e-10	16.1346
SLC25A45	-0.684164	1.94911	-6.99139	8.71359e-12	2.95741e-10	16.1286
RP11-568N6.1	-0.891814	-0.319333	-6.99083	8.74548e-12	2.96234e-10	16.125
KANK4	2.19261	0.969872	6.98688	8.97224e-12	3.03312e-10	16.1001
SYCE2	-1.35684	-1.30456	-6.97982	9.39325e-12	3.16915e-10	16.0554
CFAP44	-1.08185	1.72974	-6.97444	9.72693e-12	3.27525e-10	16.0213
SUGCT	1.06506	2.6415	6.97381	9.76658e-12	3.2787e-10	16.0174
GPD1L	-0.835471	3.69343	-6.97367	9.77567e-12	3.2787e-10	16.0165
ZNF554	-0.710365	1.56104	-6.97136	9.92291e-12	3.32154e-10	16.0019
ATP5A1	-0.454959	8.47404	-6.971	9.94635e-12	3.32286e-10	15.9996
IGFLR1	-0.890517	0.275829	-6.96666	1.02298e-11	3.40824e-10	15.9722
CSF2RB	-1.14866	3.72917	-6.96648	1.02419e-11	3.40824e-10	15.971
ZSCAN16	-1.00493	0.578254	-6.96022	1.06656e-11	3.5423e-10	15.9315
PTGDS	-1.46953	2.86098	-6.95759	1.08489e-11	3.59616e-10	15.9149
SH3BGRL2	-1.36108	2.84278	-6.95366	1.11279e-11	3.68151e-10	15.8902
PXN	0.64567	7.22973	6.95101	1.13201e-11	3.73782e-10	15.8735
RAD9B	-1.11906	-1.21255	-6.94994	1.13986e-11	3.75646e-10	15.8667
RP11-527N22.2	1.51997	0.239178	6.94411	1.18366e-11	3.89182e-10	15.83
PCP4L1	-2.20162	0.86793	-6.94387	1.1855e-11	3.89182e-10	15.8285
P4HA2	0.724862	6.46393	6.94136	1.20487e-11	3.94781e-10	15.8127
LIPE	-1.05725	2.13905	-6.94076	1.20956e-11	3.95557e-10	15.8089
ZNF101	-0.502743	3.29907	-6.93923	1.22155e-11	3.98711e-10	15.7993
CDK6	0.954551	6.46025	6.93555	1.25093e-11	4.07521e-10	15.7761
PHYKPL	-0.489354	3.94856	-6.93041	1.2931e-11	4.20454e-10	15.7438
MGAT4A	-0.908103	3.15808	-6.92994	1.2971e-11	4.20951e-10	15.7408
RP11-774O3.3	-0.959626	0.841785	-6.92768	1.31612e-11	4.26313e-10	15.7266
ZNF620	-1.0915	-0.469906	-6.92704	1.32155e-11	4.27261e-10	15.7226
GAB3	-0.947682	1.1338	-6.92475	1.34124e-11	4.32802e-10	15.7082
PRSS12	-1.61494	3.3969	-6.91817	1.39933e-11	4.50696e-10	15.6668
MAP3K14	-0.746844	4.04236	-6.91409	1.43657e-11	4.61816e-10	15.6412
PTHLH	1.6771	6.71917	6.9084	1.49013e-11	4.78132e-10	15.6056
EZH2	-0.725374	4.56692	-6.90147	1.55813e-11	4.99012e-10	15.5621
C2orf88	-1.00852	0.0751911	-6.89864	1.58669e-11	5.06619e-10	15.5444
TAPT1	-0.463983	3.65175	-6.89853	1.58783e-11	5.06619e-10	15.5437
MT1L	1.53606	0.586647	6.89071	1.66968e-11	5.31738e-10	15.4947
ZNF546	-0.843589	0.264711	-6.88532	1.7285e-11	5.49444e-10	15.461
MCF2L	-1.18403	3.2743	-6.88161	1.77014e-11	5.61632e-10	15.4378
PLA1A	-1.38926	-0.286505	-6.8813	1.77359e-11	5.61682e-10	15.4359
LINC01125	-1.04518	-1.02169	-6.87846	1.80622e-11	5.70955e-10	15.4181
WEE2-AS1	-1.02374	-1.04523	-6.8775	1.81744e-11	5.73436e-10	15.4121
CXCR4	-1.14318	4.63101	-6.87451	1.8526e-11	5.8345e-10	15.3934
GABRP	-2.81848	1.41134	-6.87062	1.89939e-11	5.97081e-10	15.3691
PAX9	-1.3064	3.98579	-6.87026	1.9037e-11	5.97334e-10	15.3669
SLC12A4	0.53117	5.77317	6.86855	1.92466e-11	6.02799e-10	15.3562
CLIC2	-0.963898	2.89375	-6.86753	1.93724e-11	6.05628e-10	15.3499
THSD1	1.10993	3.92758	6.85917	2.04377e-11	6.37762e-10	15.2977
PTPRC	-1.30505	4.46701	-6.85867	2.05032e-11	6.38635e-10	15.2946
TENM2	1.7698	6.46038	6.85461	2.10437e-11	6.54276e-10	15.2692
FHOD1	0.513473	4.97485	6.85047	2.16076e-11	6.70584e-10	15.2435
USB1	0.477315	6.34883	6.8484	2.18952e-11	6.78273e-10	15.2306
IKBKB	-0.545375	5.13403	-6.84773	2.19897e-11	6.79965e-10	15.2264
FCGBP	-1.67355	4.50261	-6.84038	2.30471e-11	7.11371e-10	15.1806
ATP8A1	-1.15486	1.63971	-6.8352	2.38218e-11	7.33952e-10	15.1484
MYO1B	0.80272	7.65368	6.82892	2.47956e-11	7.62578e-10	15.1094
INPP1	-0.79087	4.98226	-6.8286	2.4846e-11	7.62749e-10	15.1074
PPP1R3E	-0.705101	2.30717	-6.82752	2.50176e-11	7.66636e-10	15.1007
P2RY14	-1.15438	-0.597442	-6.82569	2.53113e-11	7.74245e-10	15.0893
EPB41L4A	-1.20966	1.81957	-6.82495	2.54303e-11	7.7649e-10	15.0848
RAB33A	-0.829769	-0.478466	-6.8242	2.55532e-11	7.78848e-10	15.0801
GGA2	-0.593302	6.10026	-6.82073	2.61243e-11	7.94831e-10	15.0585
ABI3	-0.895359	3.08046	-6.82017	2.62166e-11	7.96217e-10	15.0551
IL2RB	-1.12581	3.8616	-6.81761	2.66477e-11	8.07109e-10	15.0392
GPBP1	-0.377908	6.09057	-6.81748	2.66699e-11	8.07109e-10	15.0384
TPM1	0.979375	6.75651	6.81687	2.67737e-11	8.08813e-10	15.0346
CDC42SE2	-0.494719	5.46335	-6.81422	2.72294e-11	8.21124e-10	15.0182
ALDH9A1	-0.505284	6.18048	-6.81356	2.73442e-11	8.23127e-10	15.0141
FAM149A	-1.34052	-0.119876	-6.81223	2.75765e-11	8.28658e-10	15.0059
TSGA10	-0.743642	0.659676	-6.8056	2.87651e-11	8.62852e-10	14.9647
EVA1C	-0.993084	3.61348	-6.80176	2.94763e-11	8.82631e-10	14.941
FBXO25	-0.54844	4.44692	-6.79793	3.02016e-11	9.01599e-10	14.9173
TLR5	-1.0324	2.55523	-6.79768	3.02493e-11	9.01599e-10	14.9157
SLC25A25-AS1	-1.04765	1.56894	-6.79758	3.02685e-11	9.01599e-10	14.9151
AF131215.9	-1.2366	-0.54784	-6.79327	3.111e-11	9.25046e-10	14.8884
C19orf38	-0.958201	0.26725	-6.79292	3.11783e-11	9.25462e-10	14.8863
CXCL17	-2.16016	3.21486	-6.78827	3.21124e-11	9.51533e-10	14.8575
JAK3	-0.966789	3.73341	-6.78791	3.21871e-11	9.52091e-10	14.8553
FAM184A	-1.36533	-0.890118	-6.7871	3.23514e-11	9.54319e-10	14.8503
LINC01116	1.25808	1.48111	6.78687	3.23988e-11	9.54319e-10	14.8489
SLC25A23	-0.90212	5.04893	-6.78672	3.24305e-11	9.54319e-10	14.8479
TIFA	-0.644969	3.71515	-6.78506	3.27737e-11	9.62756e-10	14.8377
SPN	-1.19451	2.79706	-6.78327	3.31476e-11	9.72063e-10	14.8266
PTRF	0.638956	8.75554	6.78049	3.3738e-11	9.87677e-10	14.8094
MIR155HG	-1.13889	-0.65321	-6.78013	3.38136e-11	9.88192e-10	14.8073
PRSS36	-0.855277	1.02513	-6.77843	3.41811e-11	9.97222e-10	14.7967
PATL2	-1.0099	-0.427398	-6.77732	3.44228e-11	1.00256e-09	14.7899
SETD3	0.345136	5.82088	6.77359	3.52459e-11	1.02478e-09	14.7669
GCSAM	-0.865644	1.65032	-6.77229	3.5537e-11	1.03148e-09	14.7588
PRNP	0.676662	8.38573	6.771	3.58291e-11	1.03651e-09	14.7509
CCR2	-1.49627	-0.0100089	-6.77099	3.58318e-11	1.03651e-09	14.7508
SIAH1	0.517868	4.16119	6.76742	3.66508e-11	1.0584e-09	14.7288
CP	-2.33153	1.66185	-6.76241	3.78307e-11	1.09063e-09	14.6979
SCAMP5	-0.981322	2.5319	-6.75992	3.84308e-11	1.10605e-09	14.6826
PTPN7	-1.15367	3.02388	-6.75164	4.04965e-11	1.16354e-09	14.6316
PIP5K1B	-1.45691	-0.127318	-6.75033	4.08341e-11	1.16981e-09	14.6235
KIAA1683	-1.32916	-0.134935	-6.75026	4.08522e-11	1.16981e-09	14.6231
NUBP1	-0.395163	3.81478	-6.74597	4.19739e-11	1.19992e-09	14.5967
CTLA4	-1.16177	1.51535	-6.73714	4.43813e-11	1.26661e-09	14.5424
ICOSLG	-0.937313	-0.823106	-6.72509	4.78845e-11	1.36431e-09	14.4685
HID1	-1.12688	2.52381	-6.72396	4.82245e-11	1.3717e-09	14.4616
SEC14L2	0.968633	4.43639	6.72182	4.88793e-11	1.38801e-09	14.4484
KIFC3	0.678335	5.8361	6.71569	5.08019e-11	1.4402e-09	14.4109
SMTN	0.697783	6.24043	6.71399	5.13493e-11	1.45331e-09	14.4005
MMP14	0.651424	9.05372	6.71337	5.15501e-11	1.45657e-09	14.3967
CYTH3	0.569889	4.97067	6.71218	5.19368e-11	1.46507e-09	14.3894
EPHX2	-1.01773	3.36039	-6.71178	5.20686e-11	1.46636e-09	14.3869
BRD8	-0.518466	4.90775	-6.70441	5.45368e-11	1.53333e-09	14.3418
AMY2B	-1.31737	-0.430132	-6.70285	5.50743e-11	1.54589e-09	14.3323
HSPB3	2.33908	0.206955	6.70141	5.55756e-11	1.5574e-09	14.3235
COL5A2	1.23972	7.74659	6.69565	5.76222e-11	1.6121e-09	14.2883
ERO1LB	-0.93386	2.5154	-6.69213	5.89087e-11	1.64539e-09	14.2668
KRT13	-2.95194	7.88841	-6.68914	6.00253e-11	1.67383e-09	14.2485
CCDC28A	-0.477887	3.68959	-6.68812	6.04092e-11	1.68178e-09	14.2423
PPM1K	-0.767831	3.2359	-6.68674	6.09368e-11	1.69371e-09	14.2338
AVPR2	-1.15672	-1.67769	-6.68096	6.31838e-11	1.7533e-09	14.1986
SAP30L	-0.473749	4.75532	-6.67968	6.36926e-11	1.76372e-09	14.1908
CTSW	-1.30425	1.71315	-6.6795	6.37663e-11	1.76372e-09	14.1896
INPP5D	-1.00453	3.96857	-6.67384	6.60675e-11	1.8244e-09	14.1551
ZNF396	-0.963388	-0.315983	-6.6727	6.65392e-11	1.83446e-09	14.1482
ISOC1	-0.572213	3.81281	-6.67086	6.73109e-11	1.85274e-09	14.137
RP11-218E20.3	1.15767	0.632582	6.67027	6.75573e-11	1.85652e-09	14.1334
GNA12	0.543464	6.41555	6.6695	6.7886e-11	1.86255e-09	14.1287
GIMAP6	-1.01446	2.90911	-6.6667	6.90864e-11	1.89243e-09	14.1116
SLA	-1.01178	3.40196	-6.6628	7.07897e-11	1.93598e-09	14.0879
GP1BA	-1.0718	-0.991652	-6.65657	7.36044e-11	2.00973e-09	14.05
FRAT1	-0.706239	1.68144	-6.65073	7.63393e-11	2.08107e-09	14.0145
ATP6V0E2	-1.15722	2.5525	-6.65018	7.65994e-11	2.08483e-09	14.0112
DLGAP4	0.415254	6.84112	6.64763	7.78282e-11	2.11489e-09	13.9957
ZFPM2-AS1	1.84257	0.457735	6.64392	7.96514e-11	2.16099e-09	13.9732
LIMD2	-0.814981	3.97526	-6.64189	8.06694e-11	2.18513e-09	13.9608
LRRC4B	-1.16529	-0.494569	-6.64118	8.10267e-11	2.19132e-09	13.9565
APLN	1.04758	3.01894	6.62709	8.84633e-11	2.38865e-09	13.8711
PDLIM7	0.651228	6.29417	6.62544	8.93738e-11	2.40942e-09	13.8611
IKZF2	-1.07471	3.39655	-6.62418	9.00779e-11	2.42456e-09	13.8535
OGFRL1	-0.727629	5.40815	-6.62379	9.02951e-11	2.42657e-09	13.8511
IGFL2	1.9812	1.6979	6.62219	9.12037e-11	2.44713e-09	13.8414
PLCL2	-1.00562	1.78143	-6.6217	9.14826e-11	2.45076e-09	13.8384
IL12RB1	-1.1182	1.86729	-6.61496	9.53991e-11	2.55166e-09	13.7976
F2RL1	1.10576	5.18415	6.61446	9.56935e-11	2.55553e-09	13.7946
APBB1IP	-1.06996	2.3543	-6.61235	9.69589e-11	2.58527e-09	13.7818
EPHB6	-1.26795	3.59826	-6.60424	1.0197e-10	2.71464e-09	13.7328
FAAH2	-1.01219	2.08494	-6.597	1.06657e-10	2.83497e-09	13.6891
CD276	0.614206	7.02462	6.59636	1.07078e-10	2.84174e-09	13.6853
CENPC	-0.569067	3.79124	-6.59594	1.0736e-10	2.84478e-09	13.6827
LINC00702	1.3683	-0.0737461	6.59123	1.10537e-10	2.92441e-09	13.6543
ZNF775	-0.636223	2.78393	-6.58748	1.13143e-10	2.98872e-09	13.6317
NUP210	-1.34994	5.31709	-6.5871	1.13406e-10	2.99104e-09	13.6294
METTL25	-0.469386	1.59605	-6.58654	1.13798e-10	2.99674e-09	13.626
PTK7	0.571977	7.56541	6.58483	1.15012e-10	3.02403e-09	13.6157
PLD4	-1.19141	0.771462	-6.58427	1.1541e-10	3.02981e-09	13.6124
COL11A1	2.16242	3.77006	6.58257	1.16637e-10	3.05732e-09	13.6021
NUTF2	0.413692	6.69077	6.58131	1.17546e-10	3.07642e-09	13.5945
PRKAG2-AS1	-1.32916	-1.55723	-6.58047	1.18158e-10	3.0877e-09	13.5895
MYOM3	1.71129	2.93116	6.57883	1.19365e-10	3.11088e-09	13.5796
ADAMTS14	1.00593	2.76669	6.57877	1.1941e-10	3.11088e-09	13.5792
CDH15	1.74826	-0.836788	6.57758	1.20296e-10	3.12916e-09	13.572
RP11-54H7.4	2.23426	3.74383	6.57627	1.21271e-10	3.14972e-09	13.5642
ZBTB32	-1.01673	-0.0293496	-6.57285	1.23862e-10	3.21212e-09	13.5436
CD74	-1.13524	10.0517	-6.5701	1.25994e-10	3.26244e-09	13.527
C18orf32	-0.466862	1.89143	-6.56912	1.26755e-10	3.27715e-09	13.5212
RP11-47L3.1	-0.984951	-1.71648	-6.56879	1.27019e-10	3.27902e-09	13.5191
HSPA12A	1.16176	2.73573	6.56819	1.27488e-10	3.28614e-09	13.5155
TRIM52	-0.622724	1.97745	-6.56628	1.29005e-10	3.32022e-09	13.504
BGN	1.07992	8.35003	6.56384	1.30962e-10	3.36551e-09	13.4894
REC8	-1.06234	2.47893	-6.56169	1.32712e-10	3.40533e-09	13.4765
CSNK2A2	0.348097	6.30623	6.56041	1.33769e-10	3.42606e-09	13.4688
RP11-993B23.3	1.51808	-0.958219	6.56022	1.33922e-10	3.42606e-09	13.4677
CDKN2C	-1.04648	3.80755	-6.55732	1.36341e-10	3.48273e-09	13.4502
ULK3	-0.517197	4.95039	-6.54794	1.44469e-10	3.68481e-09	13.3939
GPR110	-1.96913	2.00605	-6.54515	1.46972e-10	3.74299e-09	13.3772
TUBB3	0.705899	-1.62244	6.54491	1.47189e-10	3.74299e-09	13.3758
TMC5	-1.75771	0.624911	-6.54423	1.47809e-10	3.75316e-09	13.3717
MXD3	-0.839095	2.55968	-6.54088	1.5089e-10	3.8183e-09	13.3516
CRABP1	-1.92513	-0.947481	-6.54072	1.51042e-10	3.8183e-09	13.3507
RBP5	-0.921364	0.558614	-6.54051	1.5124e-10	3.8183e-09	13.3494
CCDC69	-0.804722	4.18029	-6.54048	1.51271e-10	3.8183e-09	13.3492
RAPGEF6	-0.266038	-1.56056	-6.5386	1.53029e-10	3.85697e-09	13.3379
BTNL9	-1.81496	0.359348	-6.53682	1.54718e-10	3.89376e-09	13.3273
QRICH2	-1.02485	0.987984	-6.53244	1.58948e-10	3.99433e-09	13.301
SRPX	1.32111	3.0373	6.52705	1.64308e-10	4.12294e-09	13.2688
KL	-1.21722	-1.00208	-6.5249	1.66494e-10	4.17165e-09	13.2559
BEND6	0.97876	1.35324	6.52405	1.67366e-10	4.18734e-09	13.2509
RASSF6	-1.04054	2.38721	-6.52231	1.69162e-10	4.22607e-09	13.2405
LINC00925	-1.7105	1.36288	-6.51771	1.74014e-10	4.34093e-09	13.213
SUSD4	-1.53505	3.81417	-6.51645	1.7537e-10	4.36834e-09	13.2054
COL5A1	1.23133	8.31715	6.51328	1.78818e-10	4.44774e-09	13.1865
SPON2	0.962435	5.84207	6.50826	1.84408e-10	4.5801e-09	13.1566
TPD52L2	0.407457	7.36391	6.50628	1.86665e-10	4.62939e-09	13.1447
MMP13	2.401	4.66973	6.50477	1.88401e-10	4.66567e-09	13.1357
GBP4	-1.29736	4.94738	-6.4982	1.96153e-10	4.8506e-09	13.0965
HEIH	-0.473399	3.77078	-6.49099	2.05005e-10	5.05302e-09	13.0536
HLA-DOA	-1.29328	3.52887	-6.49097	2.05029e-10	5.05302e-09	13.0535
MAP2K6	-1.04699	1.09225	-6.49081	2.05229e-10	5.05302e-09	13.0526
AMIGO2	1.15436	4.45446	6.48973	2.06596e-10	5.07933e-09	13.0461
CPEB3	-0.684791	2.20753	-6.48803	2.08759e-10	5.12512e-09	13.036
NSMCE4A	-0.490324	4.22102	-6.48553	2.11976e-10	5.19661e-09	13.0211
EYA2	-1.87372	2.57793	-6.48124	2.17608e-10	5.32702e-09	12.9956
VAV1	-1.01339	2.71049	-6.4795	2.19939e-10	5.37636e-09	12.9853
pk	0.662459	6.30131	6.47897	2.20655e-10	5.38613e-09	12.9821
SFXN3	0.601534	5.24904	6.478	2.21971e-10	5.41051e-09	12.9763
RASSF5	-0.673115	5.34215	-6.47545	2.25461e-10	5.48771e-09	12.9612
ZNF33A	-0.482849	4.3144	-6.47445	2.26842e-10	5.51346e-09	12.9552
CD69	-1.1466	1.38332	-6.47333	2.28403e-10	5.54348e-09	12.9486
MROH8	-0.770068	-0.46392	-6.47205	2.3019e-10	5.57891e-09	12.941
C1orf228	-1.02322	-1.15798	-6.46614	2.38651e-10	5.77576e-09	12.9059
PYGL	0.940375	7.29547	6.46522	2.3999e-10	5.79994e-09	12.9004
LEAP2	-1.0211	-1.60858	-6.46291	2.43404e-10	5.86673e-09	12.8867
GPR35	-0.804086	0.332992	-6.46288	2.43443e-10	5.86673e-09	12.8866
RPLP0P2	1.0177	1.76928	6.46145	2.45578e-10	5.90983e-09	12.8781
TFF3	-1.96777	-0.00932678	-6.45788	2.50983e-10	6.02485e-09	12.8569
RP11-213G2.3	-0.970951	-0.323111	-6.45783	2.51065e-10	6.02485e-09	12.8566
ANXA5	0.479068	7.9932	6.45235	2.5959e-10	6.22067e-09	12.8241
KLRC1	-1.29124	-1.36201	-6.4476	2.67216e-10	6.39441e-09	12.796
TTPAL	0.551738	5.29638	6.44689	2.6837e-10	6.41303e-09	12.7918
RP11-423H2.3	-1.27229	-1.45316	-6.44386	2.73367e-10	6.52328e-09	12.7739
HMGN3	-0.63586	5.34237	-6.44331	2.7429e-10	6.53616e-09	12.7706
ANAPC7	-0.367486	5.73682	-6.44192	2.76619e-10	6.58244e-09	12.7624
BDNF-AS	-0.972174	-0.665881	-6.44131	2.77653e-10	6.59783e-09	12.7588
SLC24A2	1.42685	-0.259184	6.4367	2.85554e-10	6.77613e-09	12.7315
MCOLN2	-0.927192	1.05058	-6.43501	2.88505e-10	6.82989e-09	12.7215
TAS1R3	-1.12556	0.331424	-6.43494	2.88621e-10	6.82989e-09	12.7211
DSE	0.725301	5.9894	6.43225	2.93378e-10	6.93283e-09	12.7052
YKT6	0.36763	7.37132	6.42757	3.01853e-10	7.12324e-09	12.6775
RP11-383H13.1	1.12864	2.35792	6.42665	3.03534e-10	7.153e-09	12.6721
FOXP3	-1.00845	2.60998	-6.42621	3.04346e-10	7.16222e-09	12.6695
FDCSP	-3.22119	0.542808	-6.42556	3.05547e-10	7.18056e-09	12.6657
C1QTNF6	0.891828	5.07643	6.4252	3.06229e-10	7.18668e-09	12.6636
SYNC	1.13898	1.15077	6.42354	3.09321e-10	7.24927e-09	12.6538
DLG3	-0.632838	4.98797	-6.42147	3.1323e-10	7.33079e-09	12.6416
XCR1	-1.41265	0.082328	-6.42093	3.14269e-10	7.34502e-09	12.6384
WFDC2	-2.46381	2.23272	-6.42018	3.15691e-10	7.36815e-09	12.634
C5orf66	-0.881669	0.465389	-6.4177	3.20498e-10	7.47009e-09	12.6193
VAMP1	-0.802637	1.83805	-6.41422	3.27325e-10	7.6188e-09	12.5988
IDO1	-1.77892	3.79908	-6.41148	3.3282e-10	7.73613e-09	12.5826
HLA-DMB	-1.11225	4.35073	-6.40666	3.42678e-10	7.95442e-09	12.5543
TSPAN12	-1.08566	1.03554	-6.40597	3.44119e-10	7.97701e-09	12.5502
FAM73B	-0.475153	4.36769	-6.40413	3.47976e-10	8.05546e-09	12.5394
IGF2BP2	1.17731	5.81705	6.40246	3.51505e-10	8.1261e-09	12.5296
AGPAT4	0.832304	3.76634	6.39468	3.68466e-10	8.50198e-09	12.4838
CAV1	1.08098	7.9745	6.39455	3.68762e-10	8.50198e-09	12.483
NSUN7	-1.52525	-0.137717	-6.39279	3.72706e-10	8.5813e-09	12.4727
MT2A	1.16237	8.14096	6.38843	3.82668e-10	8.79877e-09	12.447
GIMAP4	-0.882911	3.44354	-6.38651	3.87122e-10	8.88919e-09	12.4358
RP5-1059L7.1	1.08155	0.736826	6.38504	3.90574e-10	8.95639e-09	12.4272
CLTCL1	0.800551	3.29743	6.38372	3.93707e-10	9.0161e-09	12.4194
LL0XNC01-7P3.1	-1.002	-0.799406	-6.37911	4.04822e-10	9.2582e-09	12.3924
C19orf35	-0.978028	-1.5591	-6.37645	4.11371e-10	9.39535e-09	12.3768
RFX5	-0.565185	5.24348	-6.37535	4.14116e-10	9.44539e-09	12.3703
PRF1	-1.16112	3.16752	-6.37162	4.23543e-10	9.64749e-09	12.3484
FAM98C	-0.488356	3.40739	-6.3693	4.29524e-10	9.77067e-09	12.3348
PLIN5	-1.34758	-0.959283	-6.36871	4.31059e-10	9.78541e-09	12.3313
TNFRSF11A	-0.895501	1.70244	-6.36861	4.31321e-10	9.78541e-09	12.3308
SH3BP5-AS1	-0.850806	0.86585	-6.36664	4.36475e-10	9.88919e-09	12.3192
STXBP6	-1.68358	-0.119627	-6.3632	4.45614e-10	1.00828e-08	12.2991
RP1-152L7.5	-1.58881	1.04147	-6.3613	4.50733e-10	1.01851e-08	12.288
RBM47	-0.677562	5.37621	-6.35867	4.57936e-10	1.03342e-08	12.2726
SELPLG	-0.859481	3.92845	-6.35734	4.61618e-10	1.04035e-08	12.2648
PLS3	0.444473	7.36662	6.35678	4.63177e-10	1.04248e-08	12.2615
RAB31	0.62575	7.17903	6.35074	4.80346e-10	1.0797e-08	12.2262
ZNF672	-0.456298	5.02696	-6.34997	4.82572e-10	1.08328e-08	12.2217
FOXP2	-1.52474	2.12873	-6.34505	4.97047e-10	1.11291e-08	12.193
CD44	0.575881	9.829	6.34502	4.97134e-10	1.11291e-08	12.1928
KIT	-1.22467	1.90395	-6.34482	4.97732e-10	1.11291e-08	12.1917
PPWD1	-0.445115	4.06305	-6.34371	5.01074e-10	1.11891e-08	12.1852
SLC37A1	-0.842746	3.35279	-6.34206	5.06077e-10	1.1286e-08	12.1755
PLOD1	0.573987	7.46945	6.3412	5.08694e-10	1.13296e-08	12.1705
RAB24	-0.604392	2.92157	-6.3368	5.22309e-10	1.16176e-08	12.1448
SOX11	1.425	0.157755	6.33182	5.38164e-10	1.19547e-08	12.1158
MAP7D3	0.539058	3.8588	6.33092	5.41085e-10	1.20039e-08	12.1105
COL4A4	-1.51331	0.510907	-6.32853	5.48917e-10	1.21618e-08	12.0966
GKAP1	-1.05617	0.1053	-6.32529	5.59678e-10	1.23841e-08	12.0777
RP11-285F7.2	-0.794796	0.0632875	-6.32421	5.63315e-10	1.24485e-08	12.0714
SYNRG	-0.409056	5.16496	-6.32312	5.6701e-10	1.25139e-08	12.0651
FRAT2	-0.670606	3.84154	-6.32035	5.76496e-10	1.27068e-08	12.049
ATP6V0E2-AS1	-1.11458	-1.55231	-6.31686	5.88708e-10	1.29592e-08	12.0286
MUC20	-1.78885	2.07901	-6.31579	5.9248e-10	1.30254e-08	12.0224
KDM8	-0.473317	1.59796	-6.31449	5.97103e-10	1.31101e-08	12.0149
NT5E	1.26928	4.85051	6.31365	6.00135e-10	1.31503e-08	12.01
ZNF862	-0.7804	2.35872	-6.31355	6.00479e-10	1.31503e-08	12.0094
USP20	-0.376938	4.82945	-6.31197	6.06209e-10	1.32588e-08	12.0002
ATP1A3	-1.15607	-0.362696	-6.3108	6.10445e-10	1.33343e-08	11.9934
ICOS	-1.10095	1.20608	-6.30501	6.31983e-10	1.37871e-08	11.9597
FMO3	-1.51708	0.89702	-6.30006	6.50966e-10	1.41831e-08	11.931
PDGFB	0.739497	4.24036	6.29828	6.57947e-10	1.43169e-08	11.9206
RARRES3	-1.13599	4.34645	-6.29785	6.59631e-10	1.43352e-08	11.9182
ISCU	-0.381248	5.56812	-6.2971	6.62567e-10	1.43807e-08	11.9139
TNRC6C	-0.69323	3.36234	-6.29664	6.64405e-10	1.44022e-08	11.9112
PRKAR2B	-1.03971	1.5682	-6.29373	6.76044e-10	1.46359e-08	11.8943
LRRC48	-0.654506	0.819239	-6.29294	6.79276e-10	1.46872e-08	11.8897
MSMB	-2.26459	-0.633422	-6.29043	6.89501e-10	1.48894e-08	11.8752
ACBD4	-0.659091	1.82565	-6.28722	7.0288e-10	1.51573e-08	11.8565
SHMT1	-0.606107	4.92464	-6.28702	7.03689e-10	1.51573e-08	11.8554
SIGIRR	-0.705813	3.76345	-6.28472	7.13434e-10	1.53478e-08	11.842
KLF15	-1.34585	-1.14481	-6.28184	7.25766e-10	1.55935e-08	11.8254
RGS9	-0.956085	-0.478092	-6.28016	7.33104e-10	1.57313e-08	11.8156
AC011738.4	1.54987	-0.991223	6.27808	7.42235e-10	1.58874e-08	11.8036
SPOCK1	1.53131	3.51431	6.27808	7.42247e-10	1.58874e-08	11.8036
GMFG	-0.772053	3.1643	-6.27766	7.44102e-10	1.59072e-08	11.8012
PSPC1	-0.458991	4.67969	-6.27631	7.50117e-10	1.60157e-08	11.7934
ZFP62	-0.515261	3.74358	-6.27326	7.63882e-10	1.62891e-08	11.7757
LGALS2	-1.01521	0.616065	-6.27212	7.69095e-10	1.63798e-08	11.7691
MAK	-0.952495	-1.6452	-6.2697	7.80226e-10	1.65961e-08	11.7552
HOMER3	0.628284	5.78055	6.26646	7.95467e-10	1.68992e-08	11.7364
LINC00704	1.47374	-0.522484	6.26555	7.99765e-10	1.69694e-08	11.7311
WFDC21P	-1.5005	3.55366	-6.26448	8.04891e-10	1.70569e-08	11.7249
HLA-DMA	-0.997365	5.17954	-6.26353	8.0943e-10	1.71318e-08	11.7195
FKBP9	0.56963	7.0459	6.2625	8.1441e-10	1.72158e-08	11.7135
SECTM1	-0.928739	4.88901	-6.26117	8.20888e-10	1.73312e-08	11.7058
KHK	-1.0007	1.78429	-6.25919	8.30627e-10	1.75151e-08	11.6944
ZBED3	-0.962496	1.80623	-6.2574	8.39493e-10	1.76802e-08	11.6841
AC005083.1	-1.19521	-0.99181	-6.25709	8.41067e-10	1.76915e-08	11.6823
FLT3LG	-0.677226	1.11132	-6.25642	8.44382e-10	1.77393e-08	11.6784
PPFIBP1	0.544987	6.05394	6.25412	8.56041e-10	1.79621e-08	11.6651
HVCN1	-0.893142	1.6246	-6.24847	8.85222e-10	1.85516e-08	11.6326
PITX1	-0.866754	6.91156	-6.24402	9.08965e-10	1.90257e-08	11.6069
JSRP1	-1.43265	0.781714	-6.24311	9.13887e-10	1.91053e-08	11.6017
SAMSN1	-0.857921	2.57154	-6.24269	9.16134e-10	1.91288e-08	11.5993
RRAS2	0.578425	4.94802	6.23264	9.72431e-10	2.02794e-08	11.5414
PCBP1-AS1	-0.540432	2.86723	-6.23186	9.76903e-10	2.03478e-08	11.537
DNASE1L3	-1.26729	1.81647	-6.23107	9.81491e-10	2.04184e-08	11.5324
RP11-102N12.3	-0.732582	-0.758477	-6.22933	9.91649e-10	2.06045e-08	11.5224
TM4SF19-AS1	1.04279	0.349357	6.22868	9.95521e-10	2.06598e-08	11.5186
ST8SIA2	1.46926	-0.0166983	6.22779	1.00076e-09	2.07432e-08	11.5135
TRIM38	-0.461492	5.03457	-6.21729	1.0649e-09	2.20459e-08	11.4532
SPAG17	-1.48794	1.17628	-6.213	1.09232e-09	2.25861e-08	11.4286
IGFN1	1.81682	-0.246651	6.21277	1.0938e-09	2.25892e-08	11.4273
AKAP5	-0.875187	0.710269	-6.20936	1.11607e-09	2.30213e-08	11.4077
C9orf116	-0.800078	-0.0599786	-6.20776	1.12666e-09	2.32117e-08	11.3985
GTF2IRD2	-0.710381	-0.347206	-6.20521	1.14376e-09	2.35355e-08	11.3839
RP11-74E22.3	-0.89432	-1.52284	-6.2033	1.15674e-09	2.37704e-08	11.373
TGFB1	0.47154	7.03626	6.20293	1.15925e-09	2.37704e-08	11.3709
LY6G5C	-0.632924	-0.0369551	-6.20291	1.15936e-09	2.37704e-08	11.3708
PIEZO1	0.497375	7.37164	6.20229	1.16361e-09	2.38287e-08	11.3672
MPEG1	-1.07363	3.88452	-6.18958	1.25424e-09	2.5654e-08	11.2945
IL3RA	-0.387608	-1.6951	-6.18867	1.26099e-09	2.5761e-08	11.2893
TTYH3	0.61679	6.99793	6.18844	1.26265e-09	2.57641e-08	11.288
COL4A6	1.70431	4.26973	6.18823	1.26421e-09	2.57651e-08	11.2868
SLC27A2	-1.37161	0.271493	-6.18722	1.2718e-09	2.58888e-08	11.281
ETV7	-1.02072	3.34466	-6.18178	1.31322e-09	2.67e-08	11.2499
NRL	-0.554835	-0.0977384	-6.1808	1.32078e-09	2.68217e-08	11.2443
DOK3	-0.756791	2.54802	-6.17992	1.32767e-09	2.69296e-08	11.2393
CDA	1.56452	3.93772	6.17862	1.33787e-09	2.71041e-08	11.2318
L3MBTL4	-1.55775	1.00905	-6.17685	1.35182e-09	2.73544e-08	11.2218
RIBC1	-0.81248	-0.608364	-6.17538	1.36358e-09	2.75595e-08	11.2134
RNF217	0.587254	5.24073	6.175	1.36662e-09	2.75881e-08	11.2112
SPRED3	0.771075	1.10722	6.17366	1.37749e-09	2.77748e-08	11.2035
MARK4	0.353004	5.59712	6.17336	1.37987e-09	2.77898e-08	11.2019
DOCK2	-1.0683	3.31866	-6.17302	1.38269e-09	2.78137e-08	11.1999
CCDC64	-0.774753	4.12851	-6.17193	1.39151e-09	2.79583e-08	11.1937
COL6A6	-1.49123	-0.707597	-6.17057	1.40267e-09	2.81493e-08	11.1859
HOXB4	-1.51904	-0.291937	-6.17005	1.40704e-09	2.82037e-08	11.1829
PSMB8-AS1	-0.649913	2.84872	-6.16892	1.41642e-09	2.83584e-08	11.1765
SCYL3	-0.47447	3.35053	-6.1682	1.42239e-09	2.84445e-08	11.1724
RP6-191P20.5	1.17854	-1.33754	6.1678	1.4257e-09	2.84772e-08	11.1702
RP11-254F7.2	-0.838669	0.665385	-6.16535	1.4464e-09	2.88568e-08	11.1562
NGLY1	-0.379317	4.09266	-6.15988	1.49361e-09	2.9764e-08	11.125
ANKRD32	-0.575113	2.763	-6.15915	1.50006e-09	2.98575e-08	11.1208
FMO2	-1.85635	1.70459	-6.15388	1.54712e-09	3.07583e-08	11.0909
TMEM80	-0.54953	3.50574	-6.15237	1.56092e-09	3.09965e-08	11.0823
RGS20	1.15626	2.70464	6.15192	1.56506e-09	3.10425e-08	11.0797
CDH13	1.02085	5.37211	6.15065	1.5767e-09	3.1237e-08	11.0725
COL12A1	1.0969	7.8797	6.14908	1.59128e-09	3.14829e-08	11.0636
ATP13A4	-2.06692	0.961427	-6.14892	1.59281e-09	3.14829e-08	11.0626
ZNF365	1.22577	1.95421	6.14571	1.62302e-09	3.20429e-08	11.0444
SAMD10	-0.711897	2.37694	-6.14343	1.64484e-09	3.24362e-08	11.0315
TRMT10B	-0.482319	2.37524	-6.14244	1.65444e-09	3.25876e-08	11.0258
HLA-DPB1	-1.0079	6.92252	-6.14193	1.6594e-09	3.26476e-08	11.0229
SFI1	-0.569219	3.80043	-6.13952	1.68297e-09	3.30731e-08	11.0092
PBX1	-1.2741	4.33375	-6.13892	1.68894e-09	3.31522e-08	11.0058
SRRM2-AS1	-0.871098	-1.22326	-6.1387	1.69113e-09	3.31571e-08	11.0045
RP4-669K10.8	-0.936856	-1.71819	-6.136	1.718e-09	3.36451e-08	10.9893
MT2P1	1.15292	-0.664926	6.13356	1.7427e-09	3.40897e-08	10.9754
MICALCL	1.18443	2.22207	6.13276	1.75087e-09	3.42103e-08	10.9709
TRAFD1	-0.391947	5.8065	-6.1309	1.77002e-09	3.45449e-08	10.9603
UBXN11	-0.733893	3.39449	-6.13014	1.77791e-09	3.46591e-08	10.956
BCAR3	0.819513	4.53359	6.12684	1.81254e-09	3.52938e-08	10.9373
CSK	-0.369289	6.44532	-6.12654	1.81571e-09	3.53151e-08	10.9356
FOSL1	0.98869	6.00146	6.12222	1.86212e-09	3.61765e-08	10.9111
ARHGDIB	-0.640127	6.21908	-6.11768	1.91217e-09	3.71065e-08	10.8854
FHL3	0.514045	4.78117	6.11689	1.92101e-09	3.72356e-08	10.8809
MAT2B	-0.460601	5.90388	-6.11657	1.92466e-09	3.7264e-08	10.8791
SELK	-0.389876	4.70302	-6.11632	1.92747e-09	3.7276e-08	10.8777
CLIC6	-1.47856	1.54619	-6.1161	1.92992e-09	3.72812e-08	10.8765
INTS10	-0.436605	5.4446	-6.11462	1.9467e-09	3.75627e-08	10.8681
MFSD4	-1.62469	1.14788	-6.11286	1.96676e-09	3.78989e-08	10.8581
TREM1	1.24721	2.46969	6.1127	1.96857e-09	3.78989e-08	10.8572
AC004381.6	-0.664282	1.7822	-6.11039	1.9953e-09	3.83702e-08	10.8442
APBB2	0.61629	5.12537	6.10898	2.01179e-09	3.86436e-08	10.8362
DNAH1	-0.793071	1.54247	-6.10583	2.04908e-09	3.93155e-08	10.8184
SCIMP	-1.25332	0.321565	-6.10267	2.08707e-09	3.99995e-08	10.8006
ALDH5A1	-1.04714	3.34871	-6.1009	2.1087e-09	4.03686e-08	10.7906
EZH1	-0.45387	4.1107	-6.09968	2.12382e-09	4.05678e-08	10.7836
SYNGR3	-1.33231	0.945818	-6.09967	2.12387e-09	4.05678e-08	10.7836
CCT6B	-0.706126	0.16036	-6.09898	2.13251e-09	4.06555e-08	10.7797
APOBEC3G	-0.960397	3.6655	-6.09892	2.13323e-09	4.06555e-08	10.7793
RPA2	-0.510051	5.40798	-6.09796	2.14515e-09	4.0837e-08	10.7739
FXYD5	0.731404	6.8267	6.09274	2.21133e-09	4.20499e-08	10.7445
TCEANC	-0.534604	0.799602	-6.08567	2.30414e-09	4.37657e-08	10.7046
LIG1	-0.568699	5.43854	-6.0854	2.30777e-09	4.3786e-08	10.7031
MSN	0.596745	9.43165	6.0841	2.32531e-09	4.40697e-08	10.6958
ZBTB18	-0.793419	3.39518	-6.0826	2.34562e-09	4.44052e-08	10.6873
ITGB2-AS1	-1.07633	-0.244477	-6.08097	2.36793e-09	4.47778e-08	10.6782
LTK	-1.22447	-0.753047	-6.08052	2.37416e-09	4.48458e-08	10.6756
TMC7	0.775534	2.13458	6.07704	2.42259e-09	4.57099e-08	10.656
CD151	0.523583	7.84012	6.07551	2.44419e-09	4.60665e-08	10.6474
FCF1P2	-0.485059	1.22361	-6.07347	2.47337e-09	4.6565e-08	10.6359
SREBF1	-0.595851	7.32477	-6.06853	2.54531e-09	4.78665e-08	10.6081
WNT7A	1.75127	2.36467	6.0683	2.54871e-09	4.78775e-08	10.6068
NGF	1.53713	-0.107259	6.06492	2.59916e-09	4.87714e-08	10.5878
ZNF37BP	-0.750356	2.26695	-6.06433	2.60794e-09	4.88639e-08	10.5846
FOXRED2	-0.843899	4.92703	-6.06421	2.60982e-09	4.88639e-08	10.5839
RNF212	-1.95005	-0.0304853	-6.06233	2.63846e-09	4.93459e-08	10.5733
PTPN6	-0.515738	5.43219	-6.0608	2.66193e-09	4.97302e-08	10.5647
CXorf21	-0.972697	0.123531	-6.05919	2.68682e-09	5.01122e-08	10.5557
RNF125	-0.81112	1.28467	-6.0591	2.68826e-09	5.01122e-08	10.5552
NWD1	-1.45359	-0.953765	-6.05783	2.70806e-09	5.04262e-08	10.548
TLR7	-1.28466	0.389427	-6.0564	2.73061e-09	5.07905e-08	10.54
SLC1A1	-1.23661	1.0904	-6.05445	2.7616e-09	5.1311e-08	10.5291
HLA-DRA	-1.02994	8.57392	-6.04361	2.9403e-09	5.45716e-08	10.4683
FLNC	1.62246	4.64518	6.04067	2.99063e-09	5.54455e-08	10.4519
RUFY4	-1.33081	-0.741693	-6.03891	3.02131e-09	5.59534e-08	10.442
SLC6A16	-1.05971	-1.00912	-6.03551	3.08114e-09	5.69995e-08	10.423
LINC00346	0.920384	2.33766	6.03287	3.12847e-09	5.78123e-08	10.4082
MFNG	-0.802616	2.789	-6.03209	3.14252e-09	5.8009e-08	10.4038
P4HA1	0.620141	5.78478	6.03112	3.16022e-09	5.82726e-08	10.3984
UBA7	-0.759013	4.96273	-6.0277	3.22328e-09	5.93712e-08	10.3793
KDELR2	0.342878	7.88988	6.02666	3.24262e-09	5.96628e-08	10.3735
PPAPDC1B	-0.682107	4.09617	-6.01976	3.3741e-09	6.2015e-08	10.3349
WNK2	-2.03643	2.73885	-6.01796	3.40926e-09	6.25937e-08	10.3249
SUOX	-0.55414	3.68389	-6.01589	3.45028e-09	6.32786e-08	10.3133
ZNF557	-0.448579	2.66375	-6.01456	3.47676e-09	6.36958e-08	10.3059
EFNB1	0.556461	7.54744	6.00914	3.58695e-09	6.56439e-08	10.2757
SMARCA2	-0.71046	6.04501	-6.00891	3.59161e-09	6.56587e-08	10.2744
DCLRE1C	-0.456254	3.0691	-6.00489	3.67557e-09	6.71214e-08	10.252
EFNB2	0.734238	6.07991	6.0026	3.72442e-09	6.79408e-08	10.2392
CCDC97	-0.364074	5.27067	-6.00114	3.75574e-09	6.84387e-08	10.2311
LMNB1	-0.675315	5.7133	-5.99947	3.79203e-09	6.90009e-08	10.2218
CYB5RL	-0.683162	0.733324	-5.99935	3.79468e-09	6.90009e-08	10.2211
SERINC2	0.77106	7.76349	5.99829	3.81782e-09	6.93476e-08	10.2152
TNRC6C-AS1	-0.806796	2.24514	-5.99704	3.84527e-09	6.97718e-08	10.2083
AKAP17A	-0.291108	-0.434315	-5.99678	3.85093e-09	6.98002e-08	10.2069
DOCK10	-0.912269	3.29838	-5.99502	3.89021e-09	7.04371e-08	10.197
RP11-499P20.2	-0.968234	-1.30847	-5.99121	3.97606e-09	7.18992e-08	10.1759
RP11-145A3.1	1.2478	-0.336596	5.99107	3.97939e-09	7.18992e-08	10.1751
CEACAM1	-1.22114	3.73375	-5.98656	4.08376e-09	7.37068e-08	10.15
RP1-309I22.2	1.30419	-1.01973	5.98089	4.21858e-09	7.60595e-08	10.1185
ZADH2	-0.504966	4.47659	-5.97784	4.29294e-09	7.73184e-08	10.1016
PANX1	0.580823	5.23344	5.97449	4.3761e-09	7.87328e-08	10.083
DVL1	0.423359	6.41544	5.97426	4.38195e-09	7.87548e-08	10.0817
ALDH16A1	-0.45254	5.66406	-5.97172	4.44617e-09	7.98249e-08	10.0676
APCDD1L-AS1	1.64468	0.00606645	5.9711	4.46187e-09	8.00225e-08	10.0642
CEACAM5	-2.22831	4.1805	-5.97028	4.4828e-09	8.03096e-08	10.0597
JADE1	-0.604343	3.66508	-5.96993	4.49181e-09	8.03096e-08	10.0578
IQCB1	-0.669799	4.12624	-5.96992	4.49202e-09	8.03096e-08	10.0577
CEP120	-0.510746	3.59731	-5.9668	4.5731e-09	8.16498e-08	10.0404
BMP1	0.522362	6.36554	5.96666	4.57657e-09	8.16498e-08	10.0397
UPP1	0.8786	6.39036	5.96356	4.65845e-09	8.30237e-08	10.0225
TIMP3	1.3998	1.92259	5.95934	4.77235e-09	8.49646e-08	9.99908
CTC1	-0.417392	3.98652	-5.95916	4.77733e-09	8.49646e-08	9.99807
BCAR1	0.442007	6.58081	5.95862	4.79201e-09	8.51368e-08	9.9951
TMCO4	-0.587944	3.92287	-5.95814	4.80509e-09	8.52803e-08	9.99246
GPR65	-0.894353	0.832716	-5.95539	4.88109e-09	8.6539e-08	9.97726
KIF19	-0.968668	-1.13633	-5.95471	4.90018e-09	8.67873e-08	9.97348
OLR1	1.30856	2.0099	5.95248	4.96298e-09	8.78009e-08	9.96115
PLK3	0.530527	4.51319	5.95231	4.96772e-09	8.78009e-08	9.96022
GRK6	-0.369219	5.57805	-5.95088	5.0085e-09	8.84299e-08	9.95231
SCIN	-1.16194	1.37058	-5.95022	5.02747e-09	8.86728e-08	9.94865
CLCA4	-1.95143	2.58438	-5.94795	5.09294e-09	8.97348e-08	9.93611
TPM2	1.0926	6.61399	5.94524	5.17218e-09	9.10368e-08	9.92116
ZDHHC23	-0.859137	2.51041	-5.94353	5.22296e-09	9.18357e-08	9.9117
ASB16-AS1	-0.541303	2.38496	-5.94081	5.30447e-09	9.31728e-08	9.89671
SMOX	0.722266	4.55387	5.94051	5.31373e-09	9.32392e-08	9.89502
TMPO	-0.611902	6.51386	-5.93991	5.33173e-09	9.34589e-08	9.89174
RP11-264I13.2	-0.63913	-0.0424346	-5.93922	5.35296e-09	9.37346e-08	9.8879
NR1I3	-0.777407	-1.33029	-5.93789	5.39354e-09	9.42755e-08	9.88058
RP11-33B1.1	-0.558051	1.82759	-5.93785	5.39492e-09	9.42755e-08	9.88034
C9orf156	-0.360706	3.37917	-5.93684	5.4259e-09	9.47198e-08	9.87479
RNPC3	-0.440889	2.4821	-5.92992	5.64385e-09	9.83354e-08	9.83666
RPL3L	1.26399	0.714908	5.9299	5.64456e-09	9.83354e-08	9.83654
FBXO9	-0.435701	5.18923	-5.92964	5.65313e-09	9.83842e-08	9.83507
HTR7	1.39146	2.33256	5.92703	5.73758e-09	9.97519e-08	9.82071
HMSD	-1.41502	-1.06818	-5.92576	5.7791e-09	1.00371e-07	9.81373
ZNF114	1.25418	1.40781	5.92399	5.83776e-09	1.01287e-07	9.80395
ISG20	-0.777362	4.7753	-5.92273	5.87978e-09	1.01912e-07	9.79701
LINC00852	-0.708545	-1.19547	-5.92084	5.94319e-09	1.02907e-07	9.78662
FANCL	-0.56728	3.57496	-5.91954	5.98712e-09	1.03516e-07	9.77949
LINC01089	-0.870751	1.31447	-5.91944	5.99055e-09	1.03516e-07	9.77894
C16orf93	-0.6908	-0.721957	-5.91568	6.12011e-09	1.05648e-07	9.75822
COL1A1	1.24245	11.3644	5.91333	6.20218e-09	1.06956e-07	9.74532
SERPINI1	-1.07241	1.5326	-5.90873	6.36608e-09	1.09672e-07	9.72007
IL11	1.14717	2.2379	5.90679	6.43683e-09	1.10778e-07	9.70937
ASIC3	-0.970345	-1.14924	-5.90638	6.4517e-09	1.10922e-07	9.70714
CAMK2A	1.44196	0.0505217	5.90618	6.45888e-09	1.10934e-07	9.70606
SLC16A11	-1.16152	-0.734603	-5.90512	6.49812e-09	1.11495e-07	9.7002
MMP1	1.60739	7.88757	5.90412	6.53503e-09	1.12016e-07	9.69472
RBM24	1.77288	-0.356601	5.90281	6.58356e-09	1.12705e-07	9.68755
C7orf55-LUC7L2	-0.350331	4.90325	-5.90268	6.58844e-09	1.12705e-07	9.68684
CTD-2020K17.1	-1.03204	-0.0637206	-5.89857	6.74397e-09	1.15249e-07	9.66425
RP11-734K2.4	-0.658978	-0.475955	-5.89514	6.87621e-09	1.17331e-07	9.64545
TMEM220	-0.835351	0.759549	-5.89505	6.87953e-09	1.17331e-07	9.64499
CLU	-1.26872	6.17539	-5.89418	6.91363e-09	1.17794e-07	9.6402
FAM117A	-0.669793	3.21031	-5.89306	6.95739e-09	1.18422e-07	9.63409
CALD1	0.712978	7.4576	5.89197	7.00076e-09	1.19041e-07	9.62808
TNFRSF1A	0.306336	7.50005	5.89126	7.02871e-09	1.19397e-07	9.62422
NNMT	1.07291	5.60954	5.8907	7.05105e-09	1.19657e-07	9.62115
SLC16A1	0.610776	7.16524	5.88957	7.09624e-09	1.20304e-07	9.61497
PIK3R5	-0.83658	2.42839	-5.88875	7.12953e-09	1.20748e-07	9.61043
KLHL30	1.55365	-0.271534	5.88833	7.14632e-09	1.20913e-07	9.60816
ENPP4	-1.22327	1.15639	-5.88783	7.16668e-09	1.21137e-07	9.6054
PPM1D	-0.463799	3.51311	-5.8869	7.20437e-09	1.21653e-07	9.60033
TF	-1.94989	0.502237	-5.8821	7.40269e-09	1.24878e-07	9.57404
GMDS-AS1	-0.568609	0.542693	-5.88116	7.4419e-09	1.25416e-07	9.56893
PPCDC	-0.483895	2.78963	-5.87959	7.50846e-09	1.26412e-07	9.56031
KLF10	0.579262	6.77171	5.87712	7.6139e-09	1.28061e-07	9.54682
RAB26	-1.09214	0.143467	-5.87608	7.65875e-09	1.28688e-07	9.54113
CAP2	0.948985	2.84724	5.87522	7.69605e-09	1.29187e-07	9.53643
CLK4	-0.559225	3.31614	-5.87355	7.76902e-09	1.30284e-07	9.5273
SHE	-0.996271	1.39886	-5.8732	7.78426e-09	1.30411e-07	9.5254
GATM	-1.16571	3.01	-5.87025	7.91508e-09	1.32473e-07	9.50927
RP11-521B24.4	0.678062	1.76457	5.86861	7.98867e-09	1.33573e-07	9.50032
NEFH	-1.68198	-0.426485	-5.86719	8.05285e-09	1.34432e-07	9.49257
MAGIX	-0.679544	1.00276	-5.86713	8.05579e-09	1.34432e-07	9.49222
SLC4A3	0.839158	2.96851	5.86468	8.16787e-09	1.36168e-07	9.47885
CTD-2267D19.3	-0.621708	2.82116	-5.86223	8.28144e-09	1.37927e-07	9.46548
ACTC1	3.32064	1.45171	5.86006	8.38327e-09	1.39487e-07	9.45366
DUOX2	-1.36093	4.42398	-5.85385	8.68171e-09	1.44311e-07	9.41981
ZNF780A	-0.425037	2.82244	-5.85332	8.70799e-09	1.44604e-07	9.41688
RPS6KA5	-0.615664	3.46658	-5.85315	8.71632e-09	1.44604e-07	9.41596
PCDHGC5	1.79902	0.211965	5.8513	8.80756e-09	1.45934e-07	9.40588
CFAP70	-0.845252	-0.782708	-5.85111	8.8169e-09	1.45934e-07	9.40486
MZF1	-0.55685	3.21241	-5.851	8.82214e-09	1.45934e-07	9.40428
PAPD4	-0.348064	4.90916	-5.84651	9.04779e-09	1.49521e-07	9.37984
ANKHD1-EIF4EBP3	-0.476803	1.51732	-5.84633	9.05735e-09	1.49534e-07	9.37882
P2RY13	-1.16832	0.543784	-5.84204	9.27814e-09	1.52976e-07	9.35552
PRDX2	-0.6898	6.90376	-5.84193	9.28377e-09	1.52976e-07	9.35493
BEND5	-1.25479	-1.07992	-5.84131	9.31652e-09	1.53367e-07	9.35153
MSL3	-0.328761	4.63743	-5.83914	9.43057e-09	1.55095e-07	9.33975
NFKBID	-0.591797	1.92882	-5.83865	9.45671e-09	1.55375e-07	9.33707
DACT1	1.31207	2.0211	5.83803	9.48998e-09	1.55771e-07	9.33368
LINC00909	-0.531103	2.2539	-5.83601	9.59819e-09	1.57396e-07	9.32271
AATBC	-0.941485	1.94583	-5.8347	9.6688e-09	1.58401e-07	9.31562
MAN1C1	-0.871903	1.85321	-5.83404	9.70507e-09	1.58842e-07	9.31199
C8G	-1.21398	-1.22591	-5.8333	9.7452e-09	1.59215e-07	9.308
TATDN2	-0.371884	4.6164	-5.83328	9.74654e-09	1.59215e-07	9.30787
ZNF397	-0.539316	3.70464	-5.83091	9.87717e-09	1.61195e-07	9.29499
PPP1R14BP3	0.503616	4.22028	5.82837	1.00187e-08	1.63348e-07	9.28123
MYO15B	-0.939624	2.6645	-5.82808	1.00351e-08	1.6346e-07	9.27964
CADPS2	-0.947323	2.91427	-5.82691	1.01011e-08	1.64376e-07	9.2733
RP11-97C16.1	-0.833094	-0.895627	-5.82063	1.04629e-08	1.70101e-07	9.23926
CRYM	-1.34658	-0.961852	-5.82033	1.04806e-08	1.70227e-07	9.23763
SPP1	1.59819	6.06927	5.81877	1.05728e-08	1.71561e-07	9.22915
PHLDB2	0.816169	6.0631	5.81581	1.07498e-08	1.74267e-07	9.21309
RP11-546D6.3	-0.647503	0.701181	-5.81517	1.07881e-08	1.74722e-07	9.20965
TMPO-AS1	-0.740245	1.57294	-5.81309	1.09145e-08	1.76602e-07	9.19838
C4A	-1.26855	0.280309	-5.81283	1.09303e-08	1.76689e-07	9.19698
SH2D3C	-0.60746	3.30873	-5.81244	1.09543e-08	1.76909e-07	9.19486
GK	-0.715233	2.63531	-5.80888	1.11747e-08	1.80298e-07	9.17559
GPS2	-0.594193	1.13244	-5.80441	1.14575e-08	1.84685e-07	9.15142
ABL2	0.488217	5.53383	5.80222	1.15987e-08	1.86785e-07	9.13957
SCAI	-0.526423	2.72357	-5.80203	1.16113e-08	1.86811e-07	9.13852
RP4-740C4.5	-1.14878	-0.846558	-5.79853	1.18409e-08	1.90325e-07	9.11959
FUCA1	-0.589142	4.43354	-5.79636	1.19849e-08	1.92459e-07	9.10789
CNTD1	-0.839634	-0.752832	-5.79379	1.21583e-08	1.9506e-07	9.094
PLA2G15	0.413533	4.45173	5.79209	1.2274e-08	1.96731e-07	9.08484
FAM53B	-0.476909	5.90808	-5.78895	1.24915e-08	2.00028e-07	9.06786
RHOD	0.907146	6.20887	5.78809	1.25513e-08	2.00797e-07	9.06323
TIMM21	-0.480889	3.80405	-5.78692	1.26332e-08	2.01917e-07	9.05695
CCBE1	1.3942	0.277798	5.783	1.29129e-08	2.06195e-07	9.03576
KCNIP2	-0.842077	-0.913654	-5.7818	1.2999e-08	2.07375e-07	9.02934
PIK3CG	-1.15627	1.12294	-5.78067	1.30812e-08	2.08491e-07	9.02325
ABCA3	-1.35585	2.39385	-5.77988	1.31394e-08	2.09223e-07	9.01895
LRRC37A4P	-1.26833	0.0105847	-5.77816	1.3266e-08	2.11042e-07	9.00968
HRH1	0.609654	4.16965	5.77796	1.32805e-08	2.11076e-07	9.00862
FAM189A2	-1.33647	0.45736	-5.77568	1.34504e-08	2.13576e-07	8.99633
GJA1	0.953014	8.51145	5.77393	1.35816e-08	2.15459e-07	8.98694
CTD-2516F10.2	-1.0796	-1.00085	-5.77082	1.38193e-08	2.19026e-07	8.97017
TMEM158	0.91296	2.96542	5.76389	1.43621e-08	2.27418e-07	8.93291
FKBP14	0.550248	4.42653	5.76364	1.43825e-08	2.2753e-07	8.93154
GOLPH3L	-0.562591	4.48798	-5.76255	1.44695e-08	2.28693e-07	8.92571
TMPRSS3	-1.35929	-0.0560183	-5.76101	1.45938e-08	2.30443e-07	8.91744
RP11-51F16.1	-0.98389	0.564978	-5.76065	1.46234e-08	2.30514e-07	8.91548
DUOXA2	-1.47764	0.960791	-5.76062	1.46253e-08	2.30514e-07	8.91536
MS4A2	-1.2515	-0.836703	-5.75966	1.4704e-08	2.31541e-07	8.91017
GPR56	0.505094	7.70628	5.75793	1.48462e-08	2.33564e-07	8.90086
FLRT2	1.21574	4.76288	5.75775	1.48606e-08	2.33575e-07	8.89992
TNFRSF1B	-0.793272	5.13358	-5.75669	1.49481e-08	2.34565e-07	8.89425
TTC21A	-0.598328	0.408009	-5.75666	1.49511e-08	2.34565e-07	8.89405
GPR153	0.723721	5.59712	5.75643	1.49699e-08	2.34642e-07	8.89284
DTX2P1-UPK3BP1-PMS2P11	-0.763498	-0.184667	-5.75583	1.502e-08	2.35213e-07	8.88961
NCKAP1L	-0.955271	3.90797	-5.75513	1.50783e-08	2.35909e-07	8.88586
PARVG	-0.868913	2.64576	-5.75252	1.52988e-08	2.39139e-07	8.87183
TLR1	-0.91837	2.25199	-5.75133	1.54001e-08	2.40501e-07	8.86545
ANKRA2	-0.464638	3.11955	-5.74812	1.56765e-08	2.44593e-07	8.84825
MYADM	0.871787	6.43901	5.74428	1.60138e-08	2.49628e-07	8.82767
AGFG2	-0.508756	3.94647	-5.74333	1.60987e-08	2.50722e-07	8.82256
WTAPP1	1.16714	-1.13666	5.74129	1.62819e-08	2.53344e-07	8.81162
RP11-78O7.2	-0.650241	-1.26959	-5.7388	1.65079e-08	2.56626e-07	8.7983
ZNF671	-0.786759	0.322458	-5.73849	1.65363e-08	2.56833e-07	8.79663
PTGFRN	0.523436	8.2008	5.73798	1.65833e-08	2.57328e-07	8.79389
IL34	-1.07775	1.75049	-5.73764	1.66144e-08	2.57576e-07	8.79208
CDKN1B	-0.458145	5.38906	-5.73537	1.68242e-08	2.60591e-07	8.77995
MAST3	-0.465558	3.61039	-5.73515	1.68453e-08	2.60681e-07	8.77874
LRRC56	-0.7829	1.55405	-5.73385	1.6967e-08	2.62326e-07	8.77178
ENDOD1	0.579987	6.16605	5.73087	1.72494e-08	2.6624e-07	8.75583
ACSS1	-0.820868	4.65124	-5.73084	1.72514e-08	2.6624e-07	8.75571
CYB5D2	-0.446798	3.41751	-5.72949	1.73815e-08	2.68005e-07	8.74845
C8orf4	-1.17587	3.08826	-5.7271	1.76124e-08	2.7132e-07	8.73569
CHST11	0.73099	5.337	5.72662	1.76595e-08	2.71801e-07	8.73311
THBS1	1.0704	7.61984	5.72527	1.77919e-08	2.7359e-07	8.7259
MARK3	0.369353	6.51361	5.72371	1.79452e-08	2.75618e-07	8.7176
SLC35A4	-0.310794	6.45582	-5.72361	1.79561e-08	2.75618e-07	8.71702
PRR22	-0.944083	0.0506574	-5.72122	1.81943e-08	2.79023e-07	8.70428
C2orf15	-0.656872	-1.32135	-5.71883	1.84361e-08	2.82477e-07	8.69152
GALNT2	0.471611	7.30564	5.71086	1.92659e-08	2.94662e-07	8.64897
UBE2J1	-0.358916	5.82747	-5.71086	1.9266e-08	2.94662e-07	8.64897
SIM2	-1.29508	1.80913	-5.70671	1.97117e-08	3.01209e-07	8.62686
RP1-191J18.66	0.547591	0.11232	5.70591	1.97982e-08	3.0226e-07	8.62263
RP11-389C8.2	-0.722159	0.71716	-5.70538	1.98564e-08	3.02877e-07	8.6198
AC093627.10	-1.07519	0.136917	-5.70455	1.99479e-08	3.04001e-07	8.61535
VEGFC	1.17421	3.67332	5.70388	2.00221e-08	3.04858e-07	8.61176
CHADL	-0.834445	0.817332	-5.70151	2.02853e-08	3.08591e-07	8.59914
TMPRSS11A	-2.07213	2.90055	-5.69973	2.04848e-08	3.11347e-07	8.58969
FAM162B	-0.913738	-1.53131	-5.69843	2.06316e-08	3.13299e-07	8.58279
RGS14	-0.601727	4.61332	-5.69562	2.09535e-08	3.17904e-07	8.56783
CX3CL1	-1.2344	5.00489	-5.69009	2.16015e-08	3.27444e-07	8.5384
RINL	-0.756484	2.22863	-5.68811	2.1838e-08	3.30734e-07	8.52788
MMP16	1.1311	1.19302	5.68502	2.22123e-08	3.36104e-07	8.51146
AGBL3	-0.592699	-0.445101	-5.68213	2.25679e-08	3.41182e-07	8.49611
MME	1.29013	3.2244	5.68091	2.27186e-08	3.43156e-07	8.48968
HACL1	-0.479267	3.29954	-5.67837	2.30381e-08	3.47674e-07	8.47619
TLDC1	0.574139	5.74225	5.67766	2.31285e-08	3.48729e-07	8.4724
AHNAK2	0.978993	8.31838	5.67621	2.33129e-08	3.51198e-07	8.46473
SEC31B	-0.994584	0.918592	-5.67273	2.37627e-08	3.57658e-07	8.44627
PTPN22	-0.876305	1.53668	-5.66936	2.42064e-08	3.64015e-07	8.4284
RP11-863P13.3	1.12378	-0.345012	5.66908	2.42429e-08	3.64194e-07	8.42694
GIMAP8	-0.740902	2.59089	-5.66895	2.42611e-08	3.64194e-07	8.42622
RABL2A	-0.691439	1.41886	-5.66873	2.42902e-08	3.6431e-07	8.42506
IRF1	-0.725084	6.33075	-5.66551	2.47222e-08	3.70464e-07	8.40803
MYCN	-1.19753	-0.392398	-5.66474	2.48274e-08	3.71713e-07	8.40393
DTNBP1	-0.440737	3.69995	-5.66156	2.5264e-08	3.77917e-07	8.38709
MYO5A	0.670619	6.07479	5.66005	2.54741e-08	3.80684e-07	8.37909
HPGD	-1.25179	2.21176	-5.65991	2.54936e-08	3.80684e-07	8.37835
FGL2	-1.00422	3.72047	-5.65936	2.55702e-08	3.81493e-07	8.37545
DCAF11	-0.344337	5.96938	-5.65752	2.58283e-08	3.85007e-07	8.36575
PTN	-1.54891	2.74428	-5.65719	2.58753e-08	3.85371e-07	8.36399
TOR3A	-0.457471	5.4882	-5.65638	2.59907e-08	3.86751e-07	8.3597
ZNF552	-0.498005	2.24425	-5.65616	2.60217e-08	3.86874e-07	8.35855
E2F2	-0.678333	3.7104	-5.6552	2.6159e-08	3.88576e-07	8.35346
PYGB	0.557762	7.69864	5.6544	2.62744e-08	3.89951e-07	8.34921
KLRD1	-1.12731	0.752411	-5.65345	2.64101e-08	3.91623e-07	8.34424
ENPP5	-1.71499	-0.448772	-5.65325	2.64403e-08	3.91731e-07	8.34313
PROCR	0.796922	4.56884	5.65239	2.65643e-08	3.93226e-07	8.33861
EDARADD	-0.716389	3.23052	-5.6493	2.70168e-08	3.99577e-07	8.3223
PPARGC1B	-0.69373	3.42816	-5.64468	2.77077e-08	4.09439e-07	8.29791
CD53	-0.907428	4.26032	-5.64256	2.80313e-08	4.13862e-07	8.2867
P3H1	0.580859	5.35791	5.64219	2.80877e-08	4.14335e-07	8.28476
ACP6	-0.752233	2.23978	-5.64148	2.81973e-08	4.15593e-07	8.28099
TPSAB1	-1.06368	2.44182	-5.64125	2.82324e-08	4.15751e-07	8.27979
ENSA	-0.323634	7.45982	-5.64085	2.82942e-08	4.16301e-07	8.27768
ATF5	-0.59626	5.39082	-5.63939	2.85209e-08	4.19274e-07	8.26997
MLK7-AS1	0.802204	-1.28744	5.63772	2.8781e-08	4.22734e-07	8.2612
MYO10	0.568241	6.88938	5.63635	2.89986e-08	4.25562e-07	8.25393
SCUBE1	-1.01143	-0.784419	-5.63444	2.93021e-08	4.29647e-07	8.24387
SETDB2	-0.416124	3.00731	-5.63315	2.95093e-08	4.32312e-07	8.23707
ZG16B	-1.73023	0.539691	-5.63227	2.96501e-08	4.34003e-07	8.23247
TTLL3	-0.804961	1.8334	-5.62896	3.01903e-08	4.4153e-07	8.21504
TIGD3	-0.830701	-0.987846	-5.6284	3.02829e-08	4.42504e-07	8.21208
C9orf172	-0.785632	1.37524	-5.62677	3.05539e-08	4.46082e-07	8.20348
INTS9	-0.392475	4.07257	-5.62589	3.07001e-08	4.47833e-07	8.19887
ZFHX2	-0.969572	-0.427167	-5.62551	3.07635e-08	4.48374e-07	8.19688
ADAMTS6	0.89597	0.585931	5.62181	3.13904e-08	4.57119e-07	8.1774
SEC23A	0.507384	5.86409	5.62122	3.14916e-08	4.58202e-07	8.17429
YTHDC2	-0.461216	4.715	-5.6203	3.16492e-08	4.60101e-07	8.16947
DEF6	-0.393936	5.16645	-5.6201	3.16837e-08	4.6021e-07	8.16842
RP11-731C17.2	-0.733984	-0.19499	-5.61933	3.18169e-08	4.61432e-07	8.16437
HEXIM2	-0.513811	0.497063	-5.6193	3.1822e-08	4.61432e-07	8.16421
TTBK1	-0.955591	-1.51056	-5.61911	3.18555e-08	4.61526e-07	8.1632
CTD-2357A8.3	1.18312	-0.100709	5.61723	3.21837e-08	4.65884e-07	8.1533
ACADSB	-0.708478	3.36887	-5.61619	3.2366e-08	4.68126e-07	8.14784
P2RX5	-1.02769	-0.0744659	-5.61588	3.24202e-08	4.68205e-07	8.14623
SLC3A2	0.484654	8.45666	5.61584	3.24265e-08	4.68205e-07	8.14604
HDC	-1.08729	-0.651843	-5.61515	3.25498e-08	4.69588e-07	8.14238
HAS1	1.36803	-0.713976	5.61442	3.26782e-08	4.70589e-07	8.13858
GNGT2	-0.75262	0.266444	-5.6144	3.26824e-08	4.70589e-07	8.13845
SLC44A4	-1.62524	0.708837	-5.61429	3.27021e-08	4.70589e-07	8.13787
H1FX-AS1	-0.846324	-0.455205	-5.61332	3.28749e-08	4.72678e-07	8.13278
DHRS13	-0.655983	2.12648	-5.6123	3.30571e-08	4.74896e-07	8.12745
CARD8	-0.458783	3.65812	-5.61071	3.33448e-08	4.78625e-07	8.11908
BAG1	-0.529406	6.1336	-5.60735	3.39597e-08	4.87042e-07	8.10144
KSR1	-0.651599	4.35653	-5.60585	3.42382e-08	4.90622e-07	8.09355
USF1	-0.366749	5.3988	-5.60133	3.50881e-08	5.02379e-07	8.06988
RP11-147L13.15	-0.607416	0.46221	-5.5999	3.53626e-08	5.05884e-07	8.06236
CHGB	2.31682	1.01352	5.59915	3.55065e-08	5.07516e-07	8.05844
AREG	1.35479	5.02938	5.59787	3.57538e-08	5.10466e-07	8.05173
RP11-642P15.1	-0.603596	-1.87695	-5.59777	3.57728e-08	5.10466e-07	8.05122
CCDC78	-1.16402	-0.368719	-5.59682	3.59577e-08	5.12676e-07	8.04624
MRPS36	-0.374608	3.61953	-5.59629	3.60624e-08	5.13738e-07	8.04344
STAMBPL1	-0.685128	2.11634	-5.59511	3.62927e-08	5.16587e-07	8.03729
MSC	0.974792	3.71629	5.59409	3.64948e-08	5.1903e-07	8.03193
CACNB2	-0.717987	-0.879394	-5.59331	3.665e-08	5.20803e-07	8.02784
2019-09-06	-0.620841	4.38016	-5.59243	3.68253e-08	5.22858e-07	8.02323
C3orf70	-1.12677	1.10857	-5.59125	3.70615e-08	5.25773e-07	8.01706
ARSG	-0.603075	2.05179	-5.58946	3.7422e-08	5.30447e-07	8.00771
ZNF346	-0.334591	3.40565	-5.58904	3.75086e-08	5.31231e-07	8.00548
DUSP28	-0.450523	1.2251	-5.58819	3.76802e-08	5.33219e-07	8.00108
WNK3	-1.38439	-0.999006	-5.58643	3.80426e-08	5.37901e-07	7.99184
TLL1	1.39005	1.52245	5.58466	3.84084e-08	5.42622e-07	7.9826
CTC-524C5.2	-0.908648	-0.0520293	-5.58329	3.86951e-08	5.4622e-07	7.97542
HLA-DPA1	-0.999735	7.01571	-5.57997	3.93963e-08	5.55658e-07	7.95809
CHMP7	-0.332683	5.20422	-5.57789	3.98433e-08	5.61497e-07	7.9472
AGAP2	-0.593169	2.29026	-5.57521	4.04237e-08	5.69171e-07	7.93324
JAK2	-0.700668	3.82058	-5.57507	4.04546e-08	5.69171e-07	7.9325
SLC52A2	0.387063	6.37567	5.57479	4.05168e-08	5.69575e-07	7.93102
DNAJB5	0.67699	4.21387	5.57241	4.10417e-08	5.76e-07	7.91859
RP11-50I19.2	-0.704999	-1.7295	-5.57238	4.10482e-08	5.76e-07	7.91844
ALG6	-0.357708	3.75662	-5.57226	4.10753e-08	5.76e-07	7.91781
RPGRIP1	-0.605504	-1.87543	-5.56973	4.164e-08	5.8344e-07	7.90463
FKBP9P1	0.898709	1.30674	5.56932	4.17331e-08	5.84263e-07	7.90247
HAUS5	-0.464713	4.24005	-5.56914	4.17736e-08	5.84351e-07	7.90153
VILL	-0.732284	2.45101	-5.56844	4.19306e-08	5.86065e-07	7.89791
SAMD4A	0.752579	3.82497	5.56815	4.1996e-08	5.86498e-07	7.89641
RP11-554I8.2	1.53542	0.127314	5.56745	4.21573e-08	5.87999e-07	7.89271
PLCD3	0.594891	5.55205	5.56738	4.21725e-08	5.87999e-07	7.89236
ING5	-0.442138	3.87479	-5.56672	4.23232e-08	5.89618e-07	7.88892
BCL11A	-0.739131	4.23792	-5.56628	4.24234e-08	5.90531e-07	7.88664
CKM	2.60631	1.71789	5.56607	4.24706e-08	5.90706e-07	7.88556
PIAS2	-0.520696	3.87599	-5.56305	4.31692e-08	5.99932e-07	7.86982
TMEM198B	-0.585009	2.86167	-5.56244	4.33126e-08	6.01434e-07	7.86662
PTPN12	0.42993	6.65742	5.56168	4.34909e-08	6.03419e-07	7.86265
IK	-0.270322	6.51663	-5.55888	4.41523e-08	6.12097e-07	7.84809
CAV2	0.593542	6.82364	5.55768	4.44405e-08	6.15591e-07	7.84181
GPR176	0.954711	4.12266	5.55075	4.61318e-08	6.385e-07	7.80577
IBSP	1.41427	-0.642504	5.54931	4.64909e-08	6.42948e-07	7.79829
CD248	0.883111	5.08115	5.54916	4.65293e-08	6.42957e-07	7.79749
ILDR1	-1.17138	2.12898	-5.5485	4.66935e-08	6.44241e-07	7.79409
GBA2	-0.491941	5.05488	-5.54849	4.66978e-08	6.44241e-07	7.794
GALNS	0.50017	4.95138	5.54765	4.69087e-08	6.46627e-07	7.78965
RP11-159F24.6	0.902151	0.273739	5.54726	4.70067e-08	6.47453e-07	7.78764
PARVA	0.436279	5.73041	5.54578	4.73835e-08	6.52116e-07	7.77994
GRIN3A	-0.76284	-0.896999	-5.54562	4.74246e-08	6.52156e-07	7.7791
CDH3	0.758396	8.82179	5.54122	4.8561e-08	6.67244e-07	7.75625
HCLS1	-0.829507	4.83889	-5.53892	4.91656e-08	6.75006e-07	7.74432
CLEC3B	-0.871157	0.697989	-5.53601	4.99405e-08	6.85093e-07	7.72923
LINC00959	-0.694445	-0.604997	-5.53566	5.00352e-08	6.85841e-07	7.7274
HSD17B4	-0.393112	6.18996	-5.53252	5.08866e-08	6.96545e-07	7.71112
SPEG	1.01548	3.32781	5.53248	5.08979e-08	6.96545e-07	7.71091
BCDIN3D	-0.366565	2.01944	-5.53037	5.14801e-08	7.03946e-07	7.69993
CFL1	0.30869	10.0716	5.53006	5.15659e-08	7.04555e-07	7.69833
RP3-424M6.4	-0.491922	-0.0508305	-5.52819	5.20856e-08	7.11085e-07	7.68865
HLA-DRB1	-0.973191	7.83851	-5.52645	5.25741e-08	7.1718e-07	7.67965
RP11-517B11.7	-0.561479	0.859201	-5.52566	5.2799e-08	7.19672e-07	7.67553
GIMAP2	-0.743528	1.99841	-5.52295	5.35707e-08	7.29606e-07	7.66153
ZBTB7C	-1.35057	4.13861	-5.52102	5.4128e-08	7.36607e-07	7.65155
SMDT1	-0.425846	4.48283	-5.51659	5.54293e-08	7.53369e-07	7.62863
CNGB1	1.72041	2.41038	5.51653	5.54481e-08	7.53369e-07	7.62831
TUBD1	-0.4172	3.29736	-5.51631	5.55131e-08	7.53651e-07	7.62718
ANKMY1	-0.438115	2.84696	-5.51539	5.57878e-08	7.56777e-07	7.62241
HLA-DQA1	-1.03054	5.98074	-5.5146	5.6026e-08	7.58807e-07	7.6183
LINC01315	-1.18453	-0.730525	-5.51454	5.60445e-08	7.58807e-07	7.61799
PRSS23	0.815489	6.5958	5.51445	5.6071e-08	7.58807e-07	7.61753
RP11-526I2.5	-0.917456	-0.0125046	-5.51231	5.67171e-08	7.66942e-07	7.60648
CELF2	-0.852541	3.61007	-5.51116	5.70682e-08	7.71077e-07	7.60053
P4HA3	1.019	1.42191	5.50982	5.74786e-08	7.75873e-07	7.59361
FLNA	0.563082	10.4745	5.5097	5.75142e-08	7.75873e-07	7.59302
PPP1R14B	0.437255	6.88781	5.50823	5.79704e-08	7.81408e-07	7.5854
ZDHHC9	0.405091	5.76574	5.50622	5.85976e-08	7.89238e-07	7.57502
AC113189.5	-0.710987	1.94246	-5.50564	5.87799e-08	7.91068e-07	7.57202
TSHZ3	0.808556	3.57043	5.5051	5.895e-08	7.92731e-07	7.56923
CYP2C18	-1.65274	1.71842	-5.5049	5.90129e-08	7.9295e-07	7.56821
RNF145	-0.440356	6.93036	-5.50471	5.9073e-08	7.93133e-07	7.56722
ZFP3	-0.995163	1.81244	-5.50413	5.92574e-08	7.94982e-07	7.56422
RNF157	-0.871259	0.579652	-5.50375	5.93765e-08	7.95954e-07	7.56228
NAT1	-0.55376	1.70793	-5.5029	5.96494e-08	7.98983e-07	7.55786
GOLGA7B	1.29307	4.07932	5.50138	6.01358e-08	8.04865e-07	7.55003
PCM1	-0.452736	6.10722	-5.50039	6.04541e-08	8.08491e-07	7.54494
RP1-228P16.8	-0.59056	-1.7642	-5.49912	6.08678e-08	8.13385e-07	7.53836
RAB11B-AS1	-0.502715	1.14115	-5.49851	6.10665e-08	8.154e-07	7.53522
C10orf128	-0.713194	1.49815	-5.49725	6.14777e-08	8.20249e-07	7.52874
GCHFR	-0.888086	0.89504	-5.49439	6.24241e-08	8.32223e-07	7.51401
GDPGP1	-0.525751	1.71527	-5.4939	6.25899e-08	8.33782e-07	7.51145
CALML4	-0.723951	0.926626	-5.49209	6.31988e-08	8.41235e-07	7.50211
TNFAIP8L2	-0.818715	1.26778	-5.49167	6.33392e-08	8.42445e-07	7.49998
IQCD	-0.641249	-0.189153	-5.49041	6.37681e-08	8.47489e-07	7.49347
FAM214A	-0.537165	4.45385	-5.48717	6.48789e-08	8.60797e-07	7.47681
PACSIN1	-1.15966	-0.882131	-5.48709	6.4906e-08	8.60797e-07	7.47641
SEPSECS	-0.427524	2.88342	-5.48705	6.4921e-08	8.60797e-07	7.47619
KIAA1211L	-0.892202	2.55674	-5.48545	6.54786e-08	8.67515e-07	7.46794
STX1A	0.587001	2.58185	5.48475	6.57214e-08	8.70055e-07	7.46437
BCL2L11	-0.49299	4.95096	-5.48451	6.5806e-08	8.70498e-07	7.46313
CASP10	-0.586528	4.0412	-5.48249	6.65211e-08	8.79275e-07	7.45271
RBM23	-0.32501	5.98317	-5.48209	6.66636e-08	8.80476e-07	7.45065
CXXC1	-0.404113	5.39495	-5.48152	6.68642e-08	8.82441e-07	7.44775
MORN1	-0.514355	2.00844	-5.48053	6.7219e-08	8.86437e-07	7.44265
HMGA2	1.50082	3.95574	5.48034	6.72862e-08	8.86637e-07	7.44168
KCTD6	-0.45707	1.72154	-5.47969	6.75205e-08	8.89037e-07	7.43833
RP11-799D4.4	-0.589385	0.159082	-5.4791	6.77349e-08	8.91172e-07	7.43527
MDFI	0.657189	5.99676	5.47794	6.81552e-08	8.9601e-07	7.42931
LAMB3	0.772671	9.57523	5.47707	6.84693e-08	8.99445e-07	7.42488
ACAD8	-0.416612	3.67184	-5.47439	6.9456e-08	9.11704e-07	7.41108
C10orf55	0.732816	0.987851	5.47414	6.95485e-08	9.12105e-07	7.4098
NOX5	1.14232	-0.531745	5.47402	6.95937e-08	9.12105e-07	7.40917
OXER1	-1.09499	-0.89683	-5.47258	7.01282e-08	9.18404e-07	7.40179
FAM81A	-0.914699	0.220014	-5.46964	7.12338e-08	9.32167e-07	7.38671
PDGFC	0.847074	4.15586	5.46845	7.16884e-08	9.37396e-07	7.38058
ZNF367	-0.715212	3.32317	-5.4673	7.21298e-08	9.41228e-07	7.37466
WI2-1896O14.1	1.32998	0.0448723	5.46726	7.2145e-08	9.41228e-07	7.37446
GIN1	-0.376983	1.93279	-5.46725	7.21472e-08	9.41228e-07	7.37443
PSORS1C1	0.985374	1.16023	5.46602	7.26197e-08	9.46668e-07	7.36813
LINC00969	-0.760245	3.37222	-5.46501	7.30141e-08	9.51081e-07	7.36291
GYPC	-0.786583	2.84859	-5.4629	7.38382e-08	9.60408e-07	7.35209
MAL	-1.98253	2.3479	-5.46288	7.38429e-08	9.60408e-07	7.35203
LYZ	-1.29167	6.13657	-5.46084	7.46504e-08	9.7017e-07	7.34155
CYP2D6	-0.953156	-1.25839	-5.45945	7.52026e-08	9.76603e-07	7.33444
ARHGAP25	-0.615992	3.53779	-5.45879	7.54696e-08	9.78825e-07	7.33102
IER3IP1	-0.253709	-0.365133	-5.45873	7.54908e-08	9.78825e-07	7.33075
PAQR5	1.11364	3.67357	5.4586	7.55461e-08	9.78825e-07	7.33005
SNX2	-0.31471	5.49216	-5.45778	7.58742e-08	9.82328e-07	7.32587
GRIN2C	-1.02062	-0.746465	-5.4571	7.61479e-08	9.85124e-07	7.3224
ANO1	1.20191	6.76426	5.45609	7.65571e-08	9.89666e-07	7.31723
RCN3	0.88779	4.75654	5.45476	7.71024e-08	9.9596e-07	7.31039
RASA4CP	-0.701304	0.856633	-5.45447	7.72199e-08	9.96722e-07	7.30892
PGPEP1	-0.733099	3.18915	-5.45384	7.74778e-08	9.99294e-07	7.30571
MAP7D1	0.425268	7.88658	5.45232	7.81052e-08	1.00662e-06	7.29793
RP1-93H18.1	0.7606	-0.72904	5.45181	7.83174e-08	1.0086e-06	7.29532
AK5	1.09769	-0.492895	5.45098	7.86649e-08	1.01231e-06	7.29105
NEIL1	-0.822039	1.40323	-5.4477	8.00451e-08	1.02929e-06	7.27428
HECW1	1.01454	0.473213	5.44646	8.05745e-08	1.03532e-06	7.26793
MMP10	1.80759	5.24017	5.44296	8.20852e-08	1.05393e-06	7.25003
LYRM9	-0.73128	0.799123	-5.44275	8.21746e-08	1.05429e-06	7.24898
RP11-111M22.2	-0.845919	-1.04725	-5.44106	8.29154e-08	1.06299e-06	7.24033
ZNF576	-0.319229	3.45851	-5.44045	8.31852e-08	1.06565e-06	7.2372
INMT	-0.907191	0.552486	-5.43858	8.40127e-08	1.07544e-06	7.22766
SAFB2	-0.323863	5.4512	-5.43831	8.41321e-08	1.07616e-06	7.22629
MURC	1.45055	0.60613	5.43716	8.46488e-08	1.08196e-06	7.22038
SEL1L3	-0.737386	5.3618	-5.4347	8.5757e-08	1.095e-06	7.20785
AP001062.7	-0.72443	0.0262341	-5.43461	8.57977e-08	1.095e-06	7.20739
LRRC27	-0.525972	1.54061	-5.43289	8.65848e-08	1.10422e-06	7.19859
RP5-884M6.1	1.48686	0.231778	5.42921	8.82868e-08	1.12508e-06	7.17983
RIBC2	-1.11073	0.848622	-5.4287	8.8524e-08	1.12726e-06	7.17724
CSF2	1.51813	-0.0643863	5.42739	8.91424e-08	1.13429e-06	7.17054
NOXA1	-0.972054	1.83887	-5.42583	8.98803e-08	1.14282e-06	7.16259
TEFM	-0.352471	2.53056	-5.42542	9.00727e-08	1.14441e-06	7.16053
ZNF589	-0.576329	3.16214	-5.42438	9.05691e-08	1.14925e-06	7.15523
MACC1	-1.05581	3.17462	-5.42434	9.05884e-08	1.14925e-06	7.15503
GPLD1	-1.19759	-0.870024	-5.4238	9.0851e-08	1.15173e-06	7.15224
BRIP1	-0.648138	3.35014	-5.4229	9.12844e-08	1.15636e-06	7.14765
PAXBP1	-0.433498	4.08791	-5.42223	9.16038e-08	1.15869e-06	7.14429
VCAM1	-1.28661	3.56512	-5.42223	9.16043e-08	1.15869e-06	7.14428
TMEM178B	-1.65764	0.646177	-5.42086	9.22695e-08	1.16624e-06	7.13731
TMEM92	1.00381	1.64711	5.41895	9.32094e-08	1.17699e-06	7.12754
TCN2	-0.818022	3.76358	-5.41885	9.32585e-08	1.17699e-06	7.12704
PHIP	-0.478436	5.45092	-5.41631	9.45141e-08	1.19195e-06	7.11415
SGPP1	0.622463	3.91861	5.41609	9.46242e-08	1.19246e-06	7.11303
TNC	1.13203	9.20712	5.4156	9.48705e-08	1.19468e-06	7.11052
MSRA	-0.599206	2.48378	-5.41523	9.50585e-08	1.19616e-06	7.10861
RAMP2	-0.601066	2.59949	-5.4146	9.53729e-08	1.19924e-06	7.10543
MCM3	-0.497683	6.8591	-5.41445	9.54483e-08	1.1993e-06	7.10467
NLGN3	-0.870961	-1.16995	-5.4139	9.57269e-08	1.20191e-06	7.10186
C3orf62	-0.433661	2.79944	-5.41363	9.58638e-08	1.20275e-06	7.10049
MMP17	0.781404	2.58311	5.41304	9.61629e-08	1.20561e-06	7.09748
MN1	0.915355	4.74198	5.41252	9.64273e-08	1.20804e-06	7.09484
ACY3	-0.985907	-0.352049	-5.41219	9.65922e-08	1.2089e-06	7.09319
FAM78A	-0.729607	2.54816	-5.4121	9.66383e-08	1.2089e-06	7.09273
KDELC1	0.558827	2.75908	5.41096	9.72262e-08	1.21536e-06	7.08689
AC025171.1	-0.636838	0.0153777	-5.41036	9.75325e-08	1.2183e-06	7.08386
AF131215.2	-1.08048	-0.399582	-5.40969	9.78771e-08	1.22171e-06	7.08046
CEP70	-0.651055	3.74436	-5.40888	9.82988e-08	1.22607e-06	7.07632
SYTL3	-0.646189	2.65086	-5.40771	9.89071e-08	1.23276e-06	7.07037
MAMDC4	-0.969622	1.28088	-5.40723	9.91538e-08	1.23493e-06	7.06797
EXOC3L4	-1.45354	0.164818	-5.40169	1.02096e-07	1.27064e-06	7.0398
FAM110D	-0.747114	-0.640221	-5.40142	1.02239e-07	1.2715e-06	7.03845
RPAIN	-0.47636	3.97499	-5.3978	1.04208e-07	1.29503e-06	7.02008
MIR600HG	-0.907131	1.14038	-5.39709	1.04597e-07	1.29893e-06	7.01648
SH2D5	1.3472	2.85719	5.39398	1.06323e-07	1.31939e-06	7.00072
CACNA1D	-1.13465	-1.29646	-5.39382	1.06412e-07	1.31954e-06	6.99991
IL18R1	-0.755691	1.75747	-5.39329	1.06712e-07	1.3223e-06	6.9972
CENPH	-0.580838	3.60895	-5.39241	1.07208e-07	1.32648e-06	6.99273
ANGPTL6	-0.544256	-1.43989	-5.39238	1.07225e-07	1.32648e-06	6.99257
RP11-884K10.7	-0.481907	1.01539	-5.39224	1.073e-07	1.32648e-06	6.9919
GLG1	0.339067	7.75896	5.39214	1.07361e-07	1.32648e-06	6.99136
MTERF2	-0.510567	2.04482	-5.39097	1.0802e-07	1.33365e-06	6.98547
AKR1A1	-0.364531	6.60264	-5.39046	1.08313e-07	1.3363e-06	6.98286
TAGLN	0.891152	6.21106	5.38505	1.11435e-07	1.37383e-06	6.95548
KIAA0141	-0.340167	4.81841	-5.38126	1.13677e-07	1.40046e-06	6.93629
C9orf84	-0.832594	0.553062	-5.38102	1.13823e-07	1.40124e-06	6.93506
ANO6	0.479268	6.21382	5.37915	1.14944e-07	1.41402e-06	6.92561
RBP1	0.971486	6.49604	5.37724	1.16106e-07	1.42729e-06	6.91592
HLA-DQB1	-1.00813	6.19247	-5.37624	1.16714e-07	1.43372e-06	6.9109
RNASE6	-0.785733	2.47701	-5.37429	1.17914e-07	1.44742e-06	6.90105
CLIC5	-1.17626	0.599521	-5.37352	1.18392e-07	1.45224e-06	6.89715
N4BP3	-0.559455	3.52391	-5.37333	1.1851e-07	1.45264e-06	6.89619
TMTC2	-0.689972	3.44435	-5.37303	1.18698e-07	1.4539e-06	6.89466
ZFAND4	-0.58297	1.97846	-5.37281	1.18834e-07	1.45452e-06	6.89356
PPOX	-0.437791	2.99992	-5.37261	1.1896e-07	1.45501e-06	6.89254
COL6A1	0.891687	8.83256	5.37201	1.19331e-07	1.45827e-06	6.88954
GAS5-AS1	-0.572143	-1.52233	-5.37191	1.19397e-07	1.45827e-06	6.88901
ADH7	-2.35585	3.13528	-5.37128	1.19791e-07	1.46126e-06	6.88584
PREX1	-0.71021	4.50872	-5.37124	1.19813e-07	1.46126e-06	6.88565
CHPT1	-0.848981	3.32262	-5.36999	1.20602e-07	1.46983e-06	6.87933
ASAH1	-0.414782	6.28138	-5.36973	1.20766e-07	1.47077e-06	6.87803
PROCA1	-0.669719	-0.0104001	-5.36932	1.21026e-07	1.47289e-06	6.87595
CREB3L4	-0.626109	2.98248	-5.36829	1.21687e-07	1.47987e-06	6.87071
KLHL6	-0.814681	2.75286	-5.36701	1.22501e-07	1.48872e-06	6.86428
COCH	-1.63514	-0.471185	-5.36662	1.22752e-07	1.4907e-06	6.86232
CYP4F12	-1.67968	0.198944	-5.3658	1.23281e-07	1.49605e-06	6.85818
DUSP6	0.688493	6.11286	5.36552	1.23465e-07	1.49722e-06	6.85674
BHLHE40-AS1	-0.69151	-0.652765	-5.36297	1.25122e-07	1.51624e-06	6.8439
MYH16	1.01952	-0.653298	5.3594	1.27484e-07	1.54376e-06	6.82589
RNF138	-0.487742	4.14718	-5.35726	1.2892e-07	1.55987e-06	6.8151
ECEL1	-1.26944	-0.961566	-5.35715	1.28998e-07	1.55987e-06	6.81452
ADCY6	-0.736253	3.74704	-5.35672	1.29287e-07	1.56227e-06	6.81236
ZBTB5	-0.435758	4.72461	-5.3549	1.30522e-07	1.57607e-06	6.80321
SLU7	-0.268871	5.34172	-5.35387	1.3123e-07	1.5835e-06	6.798
ACACB	-0.838472	2.43063	-5.35344	1.3152e-07	1.58588e-06	6.79587
WFIKKN1	-1.01192	-1.31752	-5.35247	1.32194e-07	1.59288e-06	6.79095
CRBN	-0.377615	3.90115	-5.35122	1.3306e-07	1.60217e-06	6.78467
XXbac-BPG299F13.17	-0.719232	-0.452697	-5.35086	1.3331e-07	1.60405e-06	6.78286
C1orf132	-0.778745	-0.255837	-5.34939	1.34339e-07	1.6153e-06	6.77545
LAMA3	1.03646	8.26386	5.34789	1.35395e-07	1.62684e-06	6.76791
AMFR	0.2978	6.61297	5.34766	1.35559e-07	1.62767e-06	6.76675
PPM1L	-0.879686	3.43252	-5.3464	1.36452e-07	1.63723e-06	6.76043
KLF3-AS1	-0.775846	-1.14447	-5.34454	1.37786e-07	1.65207e-06	6.75106
PNPLA7	-0.707535	1.14919	-5.34398	1.38192e-07	1.65578e-06	6.74823
DCP2	-0.367669	4.64367	-5.34283	1.39023e-07	1.66456e-06	6.74246
RP11-726G1.1	-0.908593	-1.1723	-5.33795	1.42608e-07	1.70595e-06	6.71794
SRPX2	0.723489	3.74079	5.33785	1.4268e-07	1.70595e-06	6.71746
PPAP2B	-0.803112	4.70388	-5.33717	1.43187e-07	1.71081e-06	6.71404
FLJ22447	0.812091	-0.503907	5.33695	1.43351e-07	1.71157e-06	6.71294
B9D2	-0.466069	1.98899	-5.33324	1.46158e-07	1.74386e-06	6.69427
PSIP1	-0.640806	5.06469	-5.33041	1.48328e-07	1.76852e-06	6.68008
ZNF763	-0.686326	-1.471	-5.32817	1.50067e-07	1.788e-06	6.66886
RRAS	0.507354	5.33999	5.32569	1.5202e-07	1.81001e-06	6.65641
MAP4	0.379371	8.35026	5.32338	1.5386e-07	1.82942e-06	6.64483
COL10A1	1.51775	3.49836	5.32337	1.53866e-07	1.82942e-06	6.6448
TLE2	-0.917943	2.28012	-5.32293	1.54216e-07	1.83231e-06	6.6426
CTC-786C10.1	1.10696	-1.23902	5.32277	1.54348e-07	1.8326e-06	6.64179
ITGA3	0.757752	8.67684	5.32262	1.54471e-07	1.83278e-06	6.64102
PLEKHB1	-0.987416	0.380425	-5.32124	1.55585e-07	1.84471e-06	6.6341
CHAF1B	-0.558516	3.93699	-5.3197	1.56835e-07	1.85825e-06	6.6264
STRADA	-0.390799	2.53885	-5.31626	1.59666e-07	1.89047e-06	6.60918
LINC00086	-1.23027	0.10246	-5.31505	1.60671e-07	1.90105e-06	6.60314
C5orf45	-0.593647	2.30669	-5.31477	1.60906e-07	1.90251e-06	6.60173
KDM2B	-0.350429	5.16504	-5.31401	1.61544e-07	1.90873e-06	6.59792
MSANTD3	0.371615	4.95458	5.31351	1.61961e-07	1.91165e-06	6.59544
ARHGEF26	-1.50896	1.69273	-5.31345	1.62016e-07	1.91165e-06	6.59512
ASB9	-0.883888	0.113891	-5.31135	1.6379e-07	1.93125e-06	6.58463
GPR82	-0.895355	-0.967357	-5.31031	1.64681e-07	1.94041e-06	6.57941
C5orf66-AS1	-1.63356	-0.360225	-5.31006	1.6489e-07	1.94153e-06	6.57819
CC2D1A	-0.347876	5.87809	-5.30957	1.65309e-07	1.94512e-06	6.57575
SOX21	-1.79522	1.92947	-5.30868	1.66075e-07	1.95278e-06	6.5713
ZFP14	-0.735174	1.53694	-5.30851	1.66229e-07	1.95325e-06	6.5704
RP11-875O11.1	-0.627568	-1.47093	-5.30746	1.67134e-07	1.96252e-06	6.56518
MYL5	-0.574507	2.42503	-5.30567	1.68693e-07	1.97947e-06	6.55625
POSTN	1.30274	7.21885	5.30251	1.71483e-07	2.01082e-06	6.54046
FDFT1	-0.487627	6.80121	-5.30056	1.73228e-07	2.02989e-06	6.53071
PDPN	0.851984	6.68052	5.29921	1.74445e-07	2.04274e-06	6.52398
CLEC11A	0.759773	3.14801	5.29755	1.75951e-07	2.05897e-06	6.5157
FGFR1OP	-0.398626	3.21209	-5.29515	1.78154e-07	2.08331e-06	6.50373
PRR15L	-1.3555	0.100112	-5.2949	1.78383e-07	2.08456e-06	6.50249
CSF2RA	-0.383234	-1.7614	-5.29396	1.79257e-07	2.09334e-06	6.49779
P4HTM	-0.717199	3.03471	-5.2938	1.79406e-07	2.09365e-06	6.49699
KIAA1324	-1.3602	1.99785	-5.29355	1.79642e-07	2.09497e-06	6.49572
GTPBP8	-0.380049	3.49866	-5.28676	1.86063e-07	2.16837e-06	6.46193
KCNK5	-0.723671	2.4471	-5.28646	1.86355e-07	2.17027e-06	6.46042
CFLAR	-0.371195	6.54776	-5.28628	1.8653e-07	2.17084e-06	6.45952
USP30	-0.328432	3.2791	-5.28588	1.86914e-07	2.17381e-06	6.45754
RP11-635N19.1	-0.675797	-0.932075	-5.28552	1.87267e-07	2.17644e-06	6.45572
LRRC46	-0.715083	-0.815582	-5.28452	1.88233e-07	2.18618e-06	6.45077
GNB3	-0.919554	-1.26348	-5.28383	1.8891e-07	2.19254e-06	6.44732
OLFM1	-1.40485	3.44454	-5.2836	1.89135e-07	2.19366e-06	6.44617
WDR48	-0.37717	4.70151	-5.28076	1.91929e-07	2.22454e-06	6.43207
SLC7A5	0.752883	8.97876	5.28054	1.92149e-07	2.22559e-06	6.43096
DHFR	-0.635951	3.56591	-5.28023	1.9246e-07	2.22768e-06	6.42941
PTMA	-0.361268	9.40123	-5.27976	1.9293e-07	2.2316e-06	6.42706
U2AF1L4	-0.522168	2.20562	-5.2792	1.9349e-07	2.23656e-06	6.42427
C17orf104	-0.747802	-1.60712	-5.2772	1.95494e-07	2.25819e-06	6.41436
ANXA2	0.384175	10.529	5.27637	1.96335e-07	2.26636e-06	6.41023
CAPS	-0.831891	2.40191	-5.27594	1.96775e-07	2.26991e-06	6.40807
CHAF1A	-0.51504	5.20365	-5.2757	1.97015e-07	2.27114e-06	6.4069
MAP1LC3B	0.277197	6.0917	5.27533	1.97394e-07	2.27397e-06	6.40505
RP11-783K16.5	0.791138	1.70787	5.27506	1.9767e-07	2.27561e-06	6.40371
TRIM14	-0.493053	5.72732	-5.27482	1.97915e-07	2.27683e-06	6.40252
REEP3	0.409841	5.80744	5.2747	1.98043e-07	2.27683e-06	6.40189
EREG	1.90159	3.10253	5.27407	1.98682e-07	2.28263e-06	6.3988
CH507-513H4.1	-0.712911	-1.64854	-5.27299	1.99798e-07	2.2939e-06	6.39341
GTF2IRD2B	-0.593468	0.488919	-5.2717	2.01127e-07	2.30761e-06	6.38703
CLEC1A	-0.753159	0.588305	-5.27033	2.02557e-07	2.32245e-06	6.38021
C21orf58	-0.644976	2.23357	-5.26842	2.04563e-07	2.34388e-06	6.37073
LRRK2	-0.972457	1.77282	-5.26814	2.04864e-07	2.34574e-06	6.36932
ARPC1B	0.451809	7.67168	5.26796	2.05051e-07	2.34631e-06	6.36844
RP11-47I22.2	0.833277	-1.55985	5.26751	2.05533e-07	2.35025e-06	6.36618
SELE	-1.38492	2.22196	-5.26679	2.06293e-07	2.35736e-06	6.36263
CIRBP	-0.418643	6.79274	-5.26628	2.06839e-07	2.36201e-06	6.36009
CTC-479C5.12	-0.542351	0.681534	-5.2653	2.07884e-07	2.37235e-06	6.35524
FAM21C	-0.309081	4.44959	-5.2651	2.08101e-07	2.37324e-06	6.35424
MYO1F	-0.728407	3.75964	-5.2639	2.09392e-07	2.38544e-06	6.34829
P2RY11	-0.608618	2.23108	-5.26385	2.0945e-07	2.38544e-06	6.34802
STC2	0.854876	4.19497	5.26359	2.09721e-07	2.38693e-06	6.34678
CSAD	-0.683845	2.96246	-5.26128	2.12237e-07	2.41395e-06	6.3353
COA3	-0.396022	5.45945	-5.26041	2.13196e-07	2.42323e-06	6.33097
ZNF740	-0.37253	4.97043	-5.25992	2.13738e-07	2.42777e-06	6.32853
EPC1	-0.350537	4.22672	-5.25814	2.15707e-07	2.44851e-06	6.31971
CCDC146	-0.838573	1.93764	-5.2573	2.16633e-07	2.45739e-06	6.31558
HAS2	1.08649	2.73846	5.25717	2.16782e-07	2.45744e-06	6.31492
CACNB4	-1.19819	-1.21969	-5.25694	2.17036e-07	2.45869e-06	6.3138
HSF1	0.305438	6.95048	5.25384	2.20537e-07	2.49668e-06	6.29841
MDM1	-0.63911	2.56437	-5.25346	2.20964e-07	2.49986e-06	6.29654
LNX1	-0.751044	3.00951	-5.25317	2.21292e-07	2.5019e-06	6.29512
CHRNA1	1.95086	0.115905	5.25285	2.21662e-07	2.50288e-06	6.29351
CD1E	-1.2146	-0.270114	-5.25284	2.21672e-07	2.50288e-06	6.29347
CREG2	1.45601	1.26261	5.24934	2.25698e-07	2.54665e-06	6.27616
PAQR8	-0.761953	2.35073	-5.24887	2.26249e-07	2.55118e-06	6.27381
ADAMTS12	1.06045	3.89933	5.24869	2.26461e-07	2.55188e-06	6.27291
CTC-329D1.2	-0.510023	-1.59406	-5.24852	2.26649e-07	2.55231e-06	6.27211
UBE2Q2	0.405053	5.64865	5.24771	2.27605e-07	2.56138e-06	6.26806
DLX1	1.07766	1.08332	5.2472	2.28201e-07	2.5664e-06	6.26555
SLFN13	-1.0318	3.28934	-5.24704	2.28389e-07	2.56682e-06	6.26476
RNF130	-0.550259	5.19418	-5.24589	2.29735e-07	2.58024e-06	6.2591
IQCH-AS1	-0.460531	1.49358	-5.24562	2.30058e-07	2.58217e-06	6.25775
CTTN	0.717591	8.559	5.24421	2.31731e-07	2.59924e-06	6.25078
PPP1R14C	0.793456	5.87933	5.24382	2.32199e-07	2.60276e-06	6.24885
CCDC66	-0.450088	2.50553	-5.24132	2.35206e-07	2.63474e-06	6.23647
UNG	-0.415741	5.72047	-5.24071	2.3594e-07	2.64123e-06	6.23347
AC074212.5	-0.555913	-1.01718	-5.24046	2.36248e-07	2.64294e-06	6.23222
RP11-134G8.5	-0.718535	-0.029774	-5.23801	2.39238e-07	2.67463e-06	6.22012
CX3CR1	-1.06008	-0.190318	-5.23755	2.39804e-07	2.6792e-06	6.21785
SPAG4	-0.715011	1.55189	-5.23532	2.42566e-07	2.70828e-06	6.20684
EPB41L4A-AS1	-0.517405	3.00499	-5.23499	2.4297e-07	2.71102e-06	6.20524
GLUL	-0.698131	8.67072	-5.23385	2.444e-07	2.72519e-06	6.19959
CLMP	0.962412	4.06083	5.23321	2.45209e-07	2.73242e-06	6.19642
SOWAHD	-0.782829	-1.12773	-5.23287	2.45637e-07	2.7354e-06	6.19474
GOT1	-0.373266	5.65135	-5.2325	2.46104e-07	2.73881e-06	6.19291
HTRA3	0.947704	5.24623	5.23189	2.46869e-07	2.74553e-06	6.18993
NPM2	-1.2153	-0.185791	-5.2306	2.48508e-07	2.76195e-06	6.18357
CCM2L	-0.583098	0.0916603	-5.2303	2.48895e-07	2.76445e-06	6.18207
OFD1	-0.394588	4.43183	-5.23003	2.49232e-07	2.76639e-06	6.18077
HEXDC	-0.551286	3.68016	-5.22968	2.49689e-07	2.76967e-06	6.17901
FAIM3	-0.707541	2.33804	-5.22931	2.50158e-07	2.77306e-06	6.1772
SPARC	0.849015	9.80554	5.22778	2.5213e-07	2.7931e-06	6.16965
WDR90	-0.565906	4.21607	-5.22689	2.5328e-07	2.80402e-06	6.16528
ATG4D	-0.400073	4.65133	-5.22429	2.56686e-07	2.83988e-06	6.15243
FAM126A	0.515414	5.28131	5.22374	2.57405e-07	2.84599e-06	6.14974
EFHC2	-1.23086	-1.06829	-5.21944	2.63139e-07	2.9075e-06	6.12856
CEND1	-0.868377	-1.65755	-5.21924	2.63401e-07	2.9085e-06	6.1276
TMEM205	-0.471535	5.03957	-5.21873	2.64095e-07	2.91428e-06	6.12507
UNC13B	-0.55811	5.13787	-5.21857	2.64314e-07	2.91481e-06	6.12427
PDCD4-AS1	-0.506949	-0.137488	-5.21844	2.64493e-07	2.9149e-06	6.12362
ELF3	-1.15979	6.14423	-5.21581	2.68075e-07	2.95247e-06	6.11069
MLLT6	-0.464949	6.49849	-5.21346	2.71318e-07	2.98625e-06	6.09913
PLCB2	-0.719753	2.84583	-5.21218	2.73094e-07	3.00386e-06	6.09286
CCDC183-AS1	-0.632121	-0.107011	-5.21087	2.74929e-07	3.0221e-06	6.08642
TCEANC2	-0.346798	3.28434	-5.21074	2.7512e-07	3.02224e-06	6.08575
ZYG11A	-1.52182	-0.508683	-5.20953	2.76829e-07	3.03905e-06	6.0798
CTSS	-0.831786	5.58936	-5.20875	2.77924e-07	3.04911e-06	6.07601
CEP78	-0.484779	4.27006	-5.20804	2.78935e-07	3.05823e-06	6.07251
RP11-582J16.4	-0.554717	-1.0083	-5.20764	2.79512e-07	3.06259e-06	6.07053
CD38	-1.11097	3.32176	-5.20721	2.80129e-07	3.06738e-06	6.06841
ATP8B4	-0.693257	0.732767	-5.20706	2.80336e-07	3.06767e-06	6.0677
CPA3	-1.09487	2.34765	-5.20628	2.81467e-07	3.07808e-06	6.06382
CTTNBP2	-1.38267	0.0556204	-5.2056	2.82441e-07	3.08592e-06	6.06051
RTKN	0.404265	5.9214	5.20553	2.82547e-07	3.08592e-06	6.06014
SLC37A2	0.697515	5.014	5.20489	2.83469e-07	3.09401e-06	6.05701
NRROS	-0.767214	1.51561	-5.20245	2.87016e-07	3.13072e-06	6.04506
AC002310.14	-0.671605	-0.0852365	-5.20231	2.8722e-07	3.13094e-06	6.04438
PSMD5-AS1	-0.484693	3.34016	-5.20115	2.88927e-07	3.14753e-06	6.03868
NBEA	-1.16591	0.166729	-5.20015	2.90413e-07	3.1617e-06	6.03375
AES	-0.355597	7.89203	-5.19996	2.90687e-07	3.1621e-06	6.03284
ALPK1	-0.420419	4.02936	-5.19987	2.90821e-07	3.1621e-06	6.0324
DZIP3	-0.569924	2.82349	-5.19973	2.9103e-07	3.16235e-06	6.03171
RNF32	-0.615998	0.456692	-5.19916	2.91885e-07	3.16963e-06	6.02889
CLUHP3	-0.584424	2.79058	-5.19879	2.92435e-07	3.17357e-06	6.02708
NT5M	-1.00923	0.524819	-5.19461	2.98734e-07	3.23986e-06	6.0066
RPL29P19	1.16819	-0.416283	5.1944	2.99051e-07	3.24124e-06	6.00558
SLC16A2	0.937043	3.75124	5.19401	2.99659e-07	3.24577e-06	6.00362
DOK2	-0.771604	2.76569	-5.19349	3.00454e-07	3.25231e-06	6.00108
ALDH6A1	-0.585736	3.47834	-5.19323	3.00847e-07	3.25449e-06	5.99982
HLA-DRB5	-0.977656	5.93432	-5.19259	3.01826e-07	3.26301e-06	5.9967
APOL4	-0.884819	3.55895	-5.19153	3.03466e-07	3.27867e-06	5.99149
GGTA1P	-0.80155	1.31139	-5.18988	3.06031e-07	3.30428e-06	5.9834
2019-12-01	1.40635	-0.636971	5.18914	3.07186e-07	3.31465e-06	5.97978
TYK2	-0.395127	5.9758	-5.18838	3.08372e-07	3.32535e-06	5.97607
TEC	-0.633243	0.897685	-5.1875	3.09762e-07	3.33822e-06	5.97175
AK9	-0.534648	1.24665	-5.18603	3.121e-07	3.36128e-06	5.96453
EIF4E3	-0.553628	3.72151	-5.18584	3.12391e-07	3.3623e-06	5.96363
MMP3	1.60904	5.16522	5.18294	3.17044e-07	3.41022e-06	5.94942
PRRT3	-0.549329	0.961708	-5.18063	3.20785e-07	3.44829e-06	5.93815
STX18-AS1	-0.516389	-0.212631	-5.17994	3.21915e-07	3.45679e-06	5.93477
PDE3B	-0.948759	1.93991	-5.1799	3.21982e-07	3.45679e-06	5.93457
PPAPDC1A	1.31856	0.872286	5.17929	3.2298e-07	3.46532e-06	5.9316
CA12	0.942405	7.44149	5.17759	3.25792e-07	3.4933e-06	5.92326
HHEX	-0.722087	1.61145	-5.17512	3.29905e-07	3.53517e-06	5.91121
APOO	-0.414897	3.36903	-5.17425	3.3137e-07	3.54864e-06	5.90695
CDC42EP4	-0.563594	6.68872	-5.17392	3.31935e-07	3.55245e-06	5.90531
MTSS1	0.593752	6.77299	5.17121	3.36535e-07	3.59942e-06	5.89209
CPA4	1.50888	3.93631	5.1705	3.37742e-07	3.61007e-06	5.88865
ALDH1A1	-1.62826	3.67939	-5.16905	3.4025e-07	3.63459e-06	5.88154
PTOV1-AS2	-0.735092	0.282533	-5.16777	3.42466e-07	3.65453e-06	5.8753
SCNN1B	-1.46505	2.66856	-5.16772	3.42545e-07	3.65453e-06	5.87508
RP11-9E17.1	-0.648735	1.78874	-5.16543	3.4656e-07	3.69505e-06	5.86388
STON2	0.600274	5.78907	5.16399	3.49099e-07	3.7198e-06	5.85687
BEAN1	0.900723	0.0116037	5.16178	3.5304e-07	3.75944e-06	5.84608
RP11-334C17.5	-0.814827	0.420329	-5.15998	3.56279e-07	3.79156e-06	5.83731
HIRIP3	-0.417877	4.11545	-5.1597	3.56779e-07	3.7945e-06	5.83596
XXbac-BPGBPG55C20.2	-0.774657	-1.56972	-5.15954	3.57066e-07	3.79519e-06	5.83519
GPR137C	-0.797675	-0.457187	-5.15893	3.58184e-07	3.8047e-06	5.83218
TPSB2	-1.18861	2.40788	-5.15804	3.59798e-07	3.81946e-06	5.82787
GPR113	-0.573159	-0.900005	-5.15728	3.61194e-07	3.83189e-06	5.82415
CDH17	-1.06022	-1.50148	-5.15616	3.6324e-07	3.85121e-06	5.81872
BTN2A2	-0.565058	3.29803	-5.15586	3.63794e-07	3.85468e-06	5.81725
GMIP	-0.3538	4.3882	-5.15385	3.67511e-07	3.89117e-06	5.80749
EDNRA	0.782324	3.89803	5.15376	3.67694e-07	3.89117e-06	5.80701
RP3-428L16.2	0.69225	1.16102	5.15331	3.68517e-07	3.89745e-06	5.80486
TMEM161B-AS1	-0.603444	1.08931	-5.15314	3.68838e-07	3.89842e-06	5.80403
ZNF780B	-0.508398	2.46515	-5.1522	3.70601e-07	3.91463e-06	5.79944
DBP	-0.626602	3.61821	-5.14744	3.79636e-07	4.00758e-06	5.77631
STAT5A	-0.524601	4.95663	-5.14692	3.80637e-07	4.01566e-06	5.77377
GPR143	-1.12677	0.664484	-5.14662	3.8122e-07	4.01932e-06	5.77231
PIK3IP1	-0.565022	5.04919	-5.14366	3.86985e-07	4.07695e-06	5.75789
ELAC1	-0.444074	2.03791	-5.14356	3.87164e-07	4.07695e-06	5.75744
C9orf72	-0.617411	3.02797	-5.1426	3.89061e-07	4.09269e-06	5.75275
LAMP3	-0.818662	5.37634	-5.14256	3.8914e-07	4.09269e-06	5.75255
TEN1-CDK3	-0.769785	-0.601798	-5.14225	3.89748e-07	4.09656e-06	5.75105
SLC39A13	0.467594	5.12764	5.14181	3.90617e-07	4.10316e-06	5.74891
PCAT6	0.739065	1.84383	5.1405	3.93214e-07	4.1279e-06	5.74255
MAOB	-1.36323	2.03637	-5.1371	4.00017e-07	4.19673e-06	5.72607
POU2F2	-0.71152	2.68729	-5.13539	4.03501e-07	4.23067e-06	5.71774
AC006262.5	1.61268	0.938571	5.13514	4.03999e-07	4.23329e-06	5.71656
ZNF837	-0.618754	0.452616	-5.13243	4.09579e-07	4.28913e-06	5.70338
TESK2	-0.499115	3.05258	-5.13225	4.09946e-07	4.29033e-06	5.70252
LMO2	-0.556303	2.70474	-5.13157	4.11356e-07	4.30244e-06	5.69923
CYR61	0.723613	6.21206	5.1313	4.11917e-07	4.30567e-06	5.69792
HMBOX1	-0.40251	3.06185	-5.13107	4.12405e-07	4.30812e-06	5.69678
CLN3	-0.352803	-0.546856	-5.12933	4.16038e-07	4.34342e-06	5.68836
ABCA5	-0.558398	3.58369	-5.12722	4.20488e-07	4.38719e-06	5.67814
COL1A2	1.08457	10.4971	5.12638	4.2227e-07	4.4022e-06	5.67408
RP4-635E18.8	-0.730309	-0.555407	-5.1263	4.22444e-07	4.4022e-06	5.67368
MYO5C	-1.09592	2.54782	-5.12595	4.23191e-07	4.4073e-06	5.67198
ATP10B	-1.35154	2.70151	-5.12362	4.28179e-07	4.45464e-06	5.66073
ITGB1BP1	0.292864	5.44839	5.12349	4.28461e-07	4.45464e-06	5.6601
VGLL3	1.02863	2.61879	5.12347	4.28521e-07	4.45464e-06	5.65996
ZNF782	-0.471748	1.0498	-5.12135	4.33111e-07	4.49771e-06	5.64973
BCAT1	0.98855	4.34279	5.12132	4.33193e-07	4.49771e-06	5.64955
TRPM6	-0.978183	0.0127542	-5.12022	4.3559e-07	4.51984e-06	5.64425
THBS2	1.04792	6.85392	5.12005	4.35975e-07	4.52109e-06	5.6434
CLIC4	0.44426	7.42652	5.1179	4.40707e-07	4.56738e-06	5.63304
RBBP8NL	-0.999246	1.37416	-5.11717	4.42334e-07	4.58145e-06	5.6295
CTB-50L17.8	-0.795575	-0.525941	-5.11623	4.4443e-07	4.60036e-06	5.62496
ANKRD6	-0.945755	1.88143	-5.11577	4.45472e-07	4.60834e-06	5.62271
PHF10	-0.356481	5.36273	-5.11267	4.52467e-07	4.67787e-06	5.60775
SLC38A7	0.329149	4.91237	5.11221	4.53529e-07	4.68601e-06	5.6055
RPARP-AS1	-0.586582	2.22174	-5.11174	4.54597e-07	4.6942e-06	5.60324
RP11-465B22.8	-1.06837	0.261379	-5.10989	4.58848e-07	4.73522e-06	5.5943
HOOK2	-0.437369	5.02544	-5.10874	4.61505e-07	4.75976e-06	5.58876
MIR99AHG	-1.11864	-0.169903	-5.10751	4.64362e-07	4.78633e-06	5.58283
ZNF248	-0.474193	2.6039	-5.1061	4.67672e-07	4.81565e-06	5.57601
HLA-DQB1-AS1	-1.1055	-1.39031	-5.10606	4.67772e-07	4.81565e-06	5.57581
PAX5	-1.19654	0.955978	-5.10383	4.73042e-07	4.86697e-06	5.56505
OLMALINC	-0.603556	1.62001	-5.10196	4.7751e-07	4.90741e-06	5.55603
GCNT2	-1.16408	1.64852	-5.10189	4.7767e-07	4.90741e-06	5.5557
RP11-448G15.3	-0.890913	-0.739422	-5.10182	4.77837e-07	4.90741e-06	5.55537
OTUD7A	-0.862869	0.520813	-5.10114	4.79483e-07	4.92134e-06	5.55207
SETMAR	-0.498618	2.60727	-5.0998	4.82716e-07	4.95154e-06	5.54562
ZNF767P	-0.653949	2.12492	-5.09707	4.89379e-07	5.01687e-06	5.53245
OGFOD2	-0.326176	0.73735	-5.09302	4.99437e-07	5.1169e-06	5.51292
GCDH	-0.382806	4.23664	-5.09179	5.02532e-07	5.14551e-06	5.50699
SGCD	1.29711	2.05691	5.08896	5.09694e-07	5.21571e-06	5.49341
APOL3	-0.789595	4.83719	-5.08845	5.11011e-07	5.22606e-06	5.49093
DES	2.67255	3.25435	5.08773	5.12864e-07	5.24185e-06	5.48746
KRT14	1.41332	12.6961	5.08628	5.16582e-07	5.2767e-06	5.48052
RP5-1074L1.4	-0.864732	0.179612	-5.08488	5.2023e-07	5.31077e-06	5.47377
CBFA2T3	-0.771663	2.17902	-5.08335	5.24222e-07	5.34833e-06	5.46643
SLC38A4	1.0981	1.02331	5.08316	5.24728e-07	5.35028e-06	5.4655
LIME1	-0.65384	0.307902	-5.08198	5.27852e-07	5.37892e-06	5.45981
RGS1	-0.835366	4.79734	-5.07816	5.38031e-07	5.4789e-06	5.44147
ASF1B	-0.573184	4.91314	-5.07806	5.38307e-07	5.4789e-06	5.44098
LINC00707	1.5544	0.781755	5.07765	5.39403e-07	5.48677e-06	5.43903
ZNF181	-0.457752	2.10061	-5.07749	5.39851e-07	5.48806e-06	5.43823
YBX2	-1.7441	-0.394115	-5.07699	5.41204e-07	5.49853e-06	5.43583
RFC5	-0.473172	4.45122	-5.07653	5.4245e-07	5.5079e-06	5.43362
RAF1	-0.300102	6.26929	-5.07599	5.43897e-07	5.51931e-06	5.43107
CTD-2547L24.3	-0.61791	-0.458597	-5.07269	5.52961e-07	5.60794e-06	5.4152
STX19	-1.08003	0.40252	-5.07253	5.5341e-07	5.60916e-06	5.41443
GYLTL1B	0.776185	5.32335	5.07142	5.56469e-07	5.63682e-06	5.40913
ZNF232	-0.469779	2.62858	-5.07114	5.57263e-07	5.64028e-06	5.40777
VAT1	0.359733	7.05235	5.07106	5.57474e-07	5.64028e-06	5.4074
PART1	-1.49248	-0.061537	-5.07088	5.57997e-07	5.64222e-06	5.4065
FCGR2B	-0.775357	1.62853	-5.06965	5.61418e-07	5.67345e-06	5.40064
MBLAC2	-0.500647	2.20991	-5.06846	5.64761e-07	5.70385e-06	5.39494
NT5DC1	-0.386166	4.97323	-5.06804	5.65953e-07	5.7125e-06	5.39292
ACPP	-0.947883	2.762	-5.06769	5.66945e-07	5.71913e-06	5.39124
CGNL1	-1.05755	1.96691	-5.06703	5.68825e-07	5.7347e-06	5.38806
GPRASP1	-0.721632	0.509419	-5.06605	5.71625e-07	5.75952e-06	5.38335
TBC1D9	-0.52986	4.87652	-5.06549	5.73224e-07	5.77052e-06	5.38067
MSRB3	0.804474	3.45666	5.06543	5.73395e-07	5.77052e-06	5.38038
SDR39U1	-0.423617	2.15151	-5.06513	5.74244e-07	5.77566e-06	5.37896
DDX46	-0.31443	5.87906	-5.06219	5.82749e-07	5.85775e-06	5.36485
MTMR14	-0.296932	4.84021	-5.06167	5.8426e-07	5.86906e-06	5.36237
KIAA1875	-1.09654	-0.67309	-5.06156	5.84563e-07	5.86906e-06	5.36187
SLC16A6	-0.810275	1.54014	-5.06132	5.85277e-07	5.87276e-06	5.3607
MTERF4	-0.291556	3.93659	-5.06092	5.86442e-07	5.88098e-06	5.35879
SPRR3	-2.27799	6.10066	-5.0606	5.8737e-07	5.88577e-06	5.35727
GBAP1	-0.534268	0.584598	-5.06052	5.8761e-07	5.88577e-06	5.35688
TPRN	-0.468669	4.10878	-5.06034	5.88156e-07	5.88778e-06	5.35599
NPRL2	-0.384987	3.33982	-5.05846	5.93689e-07	5.93968e-06	5.347
PLEKHM2	0.261244	6.86505	5.05805	5.94912e-07	5.94843e-06	5.34503
TADA2A	-0.383717	3.75414	-5.05745	5.96685e-07	5.96265e-06	5.34217
MTG1	-0.427356	2.30887	-5.0557	6.01909e-07	6.01133e-06	5.33381
FAM102B	-0.565115	3.90311	-5.05271	6.10945e-07	6.098e-06	5.31951
SSTR2	-0.905293	0.341464	-5.05033	6.18246e-07	6.16726e-06	5.30811
C17orf58	-0.371443	2.74746	-5.04959	6.20525e-07	6.18637e-06	5.30458
NSUN6	-0.388188	2.77161	-5.04908	6.22108e-07	6.19852e-06	5.30214
OR7E14P	-1.06481	-0.356573	-5.04867	6.23371e-07	6.20436e-06	5.30019
RAB27A	-0.391339	4.48311	-5.04865	6.23422e-07	6.20436e-06	5.30012
TNFAIP6	0.881684	2.53304	5.04743	6.27244e-07	6.23875e-06	5.29425
MIAT	-1.05474	2.33652	-5.04313	6.40807e-07	6.36994e-06	5.27373
CLINT1	-0.461818	6.39289	-5.04271	6.42132e-07	6.37939e-06	5.27175
PRKAB1	-0.351363	4.75323	-5.04215	6.43947e-07	6.39369e-06	5.26904
MTHFD1L	0.427084	5.35675	5.04187	6.44843e-07	6.39886e-06	5.2677
SIGLEC10	-0.900584	2.29925	-5.04086	6.48071e-07	6.42714e-06	5.26291
ZNF469	1.00211	3.68505	5.04017	6.50317e-07	6.44567e-06	5.25959
WDR19	-0.470083	3.05595	-5.03948	6.52557e-07	6.4641e-06	5.2563
POC1B	-0.389991	3.59986	-5.0386	6.55421e-07	6.48871e-06	5.25209
KRT17	0.966376	12.407	5.03751	6.58971e-07	6.52006e-06	5.24691
MEIS3	0.79598	2.43062	5.03423	6.69798e-07	6.62334e-06	5.23128
CYSLTR2	-0.846745	0.111709	-5.0341	6.70232e-07	6.62379e-06	5.23066
FAM193B	-0.438294	4.56238	-5.03014	6.83556e-07	6.75155e-06	5.21178
RP3-475N16.1	-0.548141	0.0510374	-5.0294	6.86067e-07	6.77243e-06	5.20826
JAG1	0.537727	8.2733	5.02828	6.89873e-07	6.80605e-06	5.20295
ASH2L	-0.413516	5.46127	-5.02773	6.91778e-07	6.8209e-06	5.20031
SQLE	0.515013	6.91039	5.02669	6.95355e-07	6.8522e-06	5.19536
POLE	-0.425448	5.60184	-5.02493	7.01435e-07	6.90498e-06	5.18701
DCTN1	0.26058	7.53345	5.02491	7.01522e-07	6.90498e-06	5.18689
C3orf67	0.770796	2.55736	5.02461	7.02548e-07	6.9111e-06	5.18549
CDC7	-0.552477	3.29023	-5.0242	7.03973e-07	6.92112e-06	5.18355
EXT2	0.425954	6.7117	5.02372	7.05652e-07	6.93362e-06	5.18126
LRRC8C	0.545932	4.8079	5.02319	7.07542e-07	6.94819e-06	5.1787
CROCCP2	-0.57827	3.21392	-5.02138	7.13892e-07	7.0065e-06	5.17013
FHIT	-0.787081	-0.125816	-5.02118	7.146e-07	7.00942e-06	5.16918
ZNF230	-0.422287	1.50716	-5.02027	7.17847e-07	7.03675e-06	5.16483
HNRNPA1P21	-0.776172	0.344109	-5.02017	7.18212e-07	7.03675e-06	5.16434
CNOT6L	-0.393575	5.09683	-5.01997	7.18919e-07	7.03962e-06	5.1634
COL6A2	0.834731	9.07773	5.01965	7.20043e-07	7.04657e-06	5.1619
TMEM243	-0.426848	3.12134	-5.01926	7.21441e-07	7.05621e-06	5.16004
CENPK	-0.646359	2.69945	-5.01898	7.22435e-07	7.06188e-06	5.15872
PRICKLE4	-0.666079	-0.298798	-5.01858	7.23887e-07	7.07063e-06	5.15679
ADI1	-0.355752	6.08978	-5.0185	7.2416e-07	7.07063e-06	5.15643
TUBA4A	0.65902	8.17447	5.0183	7.24892e-07	7.07372e-06	5.15546
SSPO	-0.907512	-1.65412	-5.01804	7.25806e-07	7.07858e-06	5.15425
THTPA	-0.467843	1.86251	-5.01696	7.29699e-07	7.11247e-06	5.14912
CREBRF	-0.474437	3.63673	-5.01561	7.34601e-07	7.15616e-06	5.1427
CCDC170	-0.78891	-0.540993	-5.01438	7.39089e-07	7.19577e-06	5.13686
SHC1	0.391202	7.38698	5.01301	7.44122e-07	7.24064e-06	5.13035
GPATCH1	-0.340234	3.29583	-5.01074	7.5253e-07	7.31827e-06	5.11958
RUNX2	0.654514	3.74852	5.01005	7.55095e-07	7.33902e-06	5.11632
ZNF132	-0.556342	0.797846	-5.00924	7.58154e-07	7.36456e-06	5.11244
KIAA1468	-0.476797	5.06882	-5.00764	7.64158e-07	7.41865e-06	5.10487
HIGD2A	-0.380181	5.22912	-5.00748	7.64778e-07	7.42044e-06	5.1041
CLDN7	-0.977904	5.63413	-5.00708	7.66302e-07	7.43099e-06	5.10219
SOWAHB	-1.10006	1.88449	-5.00695	7.66765e-07	7.43125e-06	5.10161
S100B	-0.836906	2.22449	-5.00656	7.68266e-07	7.44156e-06	5.09973
PARD6A	-0.73932	0.415941	-5.00615	7.69828e-07	7.45246e-06	5.09779
PRKAB2	0.432766	4.6417	5.00588	7.70851e-07	7.45812e-06	5.09651
CYTH4	-0.717619	3.39798	-5.00296	7.8204e-07	7.56209e-06	5.08269
ANKRD22	-0.868443	3.90402	-5.00093	7.89925e-07	7.634e-06	5.07307
BHLHE22	-1.01702	-1.23166	-5.00079	7.90485e-07	7.63508e-06	5.0724
EXT1	0.41989	7.01683	4.99923	7.9661e-07	7.68988e-06	5.06499
SOX8	-1.05105	-1.0978	-4.99855	7.99272e-07	7.71121e-06	5.0618
OGFOD1	0.273233	5.49587	4.99816	8.0084e-07	7.72196e-06	5.05992
L1CAM	1.17943	2.49108	4.99795	8.0165e-07	7.7254e-06	5.05895
APOM	-0.463779	0.686339	-4.99735	8.04045e-07	7.7441e-06	5.05609
RP11-1277A3.1	-0.650882	0.0148358	-4.99674	8.0646e-07	7.76298e-06	5.05321
TRAF3IP2	0.321936	5.98287	4.9957	8.10628e-07	7.79869e-06	5.04827
CDON	-0.767415	1.70994	-4.99438	8.1591e-07	7.84508e-06	5.04204
CCRN4L	0.570351	3.62278	4.99425	8.16435e-07	7.84569e-06	5.04143
HADH	-0.399333	5.2207	-4.99352	8.19387e-07	7.86963e-06	5.03797
KIF24	-0.627233	2.69011	-4.99317	8.20778e-07	7.87854e-06	5.03634
KIAA1407	-0.592885	1.96784	-4.99168	8.26854e-07	7.9324e-06	5.02927
AGTRAP	0.455943	6.16514	4.99054	8.31514e-07	7.97262e-06	5.02388
RP11-295P9.3	-0.501167	2.06259	-4.99042	8.32011e-07	7.9729e-06	5.02331
ANGEL2	-0.367043	4.00654	-4.99022	8.32826e-07	7.97622e-06	5.02237
LUC7L3	-0.392047	5.93069	-4.9896	8.35391e-07	7.99629e-06	5.01942
IZUMO4	-0.749134	0.945806	-4.98936	8.36359e-07	8.00106e-06	5.01831
MT1X	0.703215	6.49991	4.98835	8.40524e-07	8.03639e-06	5.01355
MDH1B	-0.765592	-1.68505	-4.98807	8.41698e-07	8.0431e-06	5.01221
COX7C	-0.37115	6.95566	-4.98752	8.43982e-07	8.06041e-06	5.00961
CSPG4	1.06696	6.33329	4.98718	8.45385e-07	8.06929e-06	5.00802
HNRNPL	-0.214053	7.63455	-4.98693	8.46432e-07	8.07469e-06	5.00683
CASP2	-0.41969	5.38691	-4.98682	8.46899e-07	8.07469e-06	5.0063
ADAMTS15	1.16125	3.05006	4.98465	8.56019e-07	8.15708e-06	4.99604
PWWP2A	-0.33401	3.66988	-4.98372	8.59961e-07	8.19006e-06	4.99163
HYKK	-0.556116	0.836824	-4.98189	8.67719e-07	8.25933e-06	4.98302
RAD51C	-0.419449	3.52658	-4.98045	8.73912e-07	8.31363e-06	4.97621
KCNQ1	-0.688841	2.48813	-4.97906	8.79897e-07	8.36589e-06	4.96966
ZNF697	0.509759	2.85697	4.97839	8.82813e-07	8.38618e-06	4.96649
CYB5R3	0.282591	7.8013	4.97834	8.83015e-07	8.38618e-06	4.96627
CDK5RAP3	-0.398882	5.93228	-4.97768	8.85894e-07	8.40883e-06	4.96315
ENTPD4	-0.444424	5.03998	-4.97437	9.00426e-07	8.54201e-06	4.94756
POLR2J4	-0.420115	1.19244	-4.97373	9.03285e-07	8.56436e-06	4.94452
PKN3	-0.546803	3.31424	-4.97345	9.0451e-07	8.57053e-06	4.94322
MERTK	-0.876292	2.70639	-4.97336	9.04941e-07	8.57053e-06	4.94276
ATG3	-0.296562	5.69379	-4.97118	9.14701e-07	8.65815e-06	4.93248
TRAPPC13	-0.315194	3.74047	-4.97038	9.18274e-07	8.68376e-06	4.92874
ADAM12	0.98692	5.003	4.97035	9.18426e-07	8.68376e-06	4.92859
HNRNPM	-0.247758	8.04988	-4.96819	9.28234e-07	8.77163e-06	4.91841
COL16A1	0.69543	6.75476	4.96803	9.2894e-07	8.77344e-06	4.91768
CEP162	-0.484473	2.52362	-4.96705	9.33442e-07	8.81012e-06	4.91304
ZNF721	-0.395774	3.29616	-4.96696	9.33859e-07	8.81012e-06	4.91262
ITGA2B	-0.757406	-0.322324	-4.96667	9.35167e-07	8.81758e-06	4.91127
LTBR	0.318839	7.41266	4.96481	9.43762e-07	8.8937e-06	4.90251
CTD-2562J17.6	-0.630897	1.97435	-4.96448	9.45282e-07	8.90311e-06	4.90096
ATP1B2	-0.850093	-0.743634	-4.96414	9.46852e-07	8.91297e-06	4.89937
IRAK4	-0.353502	4.27023	-4.96235	9.55223e-07	8.9868e-06	4.89094
RP11-66N24.3	-0.756982	-0.146792	-4.95902	9.70966e-07	9.12987e-06	4.87527
MRPS27	-0.309585	5.63652	-4.95812	9.75259e-07	9.16518e-06	4.87104
AC069213.1	-1.47035	-1.1183	-4.95665	9.82307e-07	9.22632e-06	4.86414
CYP2E1	-1.32118	0.37305	-4.95633	9.83885e-07	9.23279e-06	4.86261
DKK3	0.717112	6.51514	4.95629	9.84079e-07	9.23279e-06	4.86242
PPIP5K2	-0.385246	4.52933	-4.95562	9.87273e-07	9.25766e-06	4.85931
ANKHD1	-0.311639	2.00886	-4.95549	9.87947e-07	9.25888e-06	4.85866
SLC2A1-AS1	0.670867	0.147839	4.95434	9.93517e-07	9.30596e-06	4.85327
RP11-21B23.2	1.31301	-0.927844	4.95355	9.97357e-07	9.33679e-06	4.84957
GPX8	0.577755	4.3466	4.95322	9.98958e-07	9.34665e-06	4.84804
GNAL	-0.867785	2.77759	-4.9522	1.00399e-06	9.38854e-06	4.84323
ZNF879	-0.896243	0.138477	-4.95011	1.01433e-06	9.47726e-06	4.8334
GALNT12	-0.875107	2.40381	-4.95006	1.01459e-06	9.47726e-06	4.83316
ZNF443	-0.705521	0.571235	-4.94971	1.01632e-06	9.48824e-06	4.83153
CTD-2124B8.2	-0.610604	-0.41113	-4.94774	1.02617e-06	9.57498e-06	4.82228
CARD10	0.657583	5.53779	4.94718	1.02897e-06	9.59582e-06	4.81968
STK17A	0.436916	6.10798	4.94571	1.03641e-06	9.65997e-06	4.81277
TNKS1BP1	0.362001	8.51959	4.94528	1.03859e-06	9.67497e-06	4.81076
RP11-973H7.3	-0.51721	-0.409123	-4.94392	1.04554e-06	9.73437e-06	4.80437
VMAC	-0.460756	1.56689	-4.94276	1.05148e-06	9.7843e-06	4.79894
BTG2	-0.571416	6.46841	-4.94254	1.05261e-06	9.78952e-06	4.79791
DSTN	0.296213	8.4006	4.94094	1.0609e-06	9.86121e-06	4.7904
PROC	1.05518	0.652178	4.94073	1.062e-06	9.86604e-06	4.78941
AGPAT3	-0.404472	6.13001	-4.94038	1.06379e-06	9.87726e-06	4.78779
SYNGR1	-0.871699	3.30137	-4.93957	1.06801e-06	9.91113e-06	4.78399
COL24A1	0.942087	0.52048	4.93893	1.07137e-06	9.93688e-06	4.78098
SH3GLB2	-0.401058	6.0449	-4.93817	1.07537e-06	9.96857e-06	4.77741
CARF	-0.515555	1.53806	-4.93733	1.07977e-06	1.00039e-05	4.7735
EDRF1	-0.383639	3.51794	-4.93682	1.08245e-06	1.00232e-05	4.77113
IMPDH1	0.458917	6.42444	4.93652	1.08409e-06	1.0033e-05	4.76968
YWHAZ	0.346793	10.5368	4.93547	1.08966e-06	1.00791e-05	4.76477
CAMK1G	0.744594	-1.37416	4.93454	1.09461e-06	1.01099e-05	4.76043
SLC27A5	-0.814683	1.63729	-4.93452	1.09469e-06	1.01099e-05	4.76036
ZNF326	-0.380042	4.5793	-4.93451	1.09477e-06	1.01099e-05	4.76029
PSMB10	-0.541586	4.84914	-4.933	1.10286e-06	1.01763e-05	4.75323
CTD-2521M24.9	-0.730189	2.08914	-4.93294	1.10316e-06	1.01763e-05	4.75297
JMY	-0.42959	4.5563	-4.93279	1.10399e-06	1.01785e-05	4.75225
MED9	-0.311664	3.8391	-4.93128	1.11214e-06	1.02481e-05	4.74521
SPHK2	-0.363367	3.37957	-4.93107	1.11331e-06	1.02533e-05	4.7442
C5orf46	1.3211	-1.14239	4.93081	1.11473e-06	1.02608e-05	4.74298
TFDP2	-0.572974	5.11944	-4.92856	1.12704e-06	1.03685e-05	4.73246
DAZAP2	-0.256143	7.76581	-4.92744	1.13323e-06	1.04199e-05	4.72721
HOXC13	1.20868	2.58688	4.92669	1.13737e-06	1.04492e-05	4.72372
COL3A1	1.09166	10.5889	4.92664	1.13765e-06	1.04492e-05	4.72348
FCHO1	-0.817919	2.12445	-4.92464	1.1488e-06	1.05459e-05	4.71414
ZNF189	-0.398469	3.6839	-4.92384	1.15327e-06	1.05812e-05	4.71043
ST6GALNAC1	-1.2646	2.3659	-4.92357	1.15479e-06	1.05895e-05	4.70916
MCPH1	-0.336767	4.09459	-4.92095	1.16965e-06	1.07201e-05	4.69691
TRAF2	-0.493516	4.98182	-4.92056	1.17187e-06	1.07346e-05	4.6951
GPRIN3	-0.754037	2.64413	-4.9189	1.18141e-06	1.08162e-05	4.68733
RP11-5C23.1	-0.525212	-0.229406	-4.91808	1.18613e-06	1.08535e-05	4.68352
MT1E	1.13685	4.91645	4.91773	1.18812e-06	1.08649e-05	4.68191
SHANK2	1.39761	2.77494	4.91764	1.18865e-06	1.08649e-05	4.68148
ZNF33B	-0.398166	3.90105	-4.91486	1.20489e-06	1.10075e-05	4.66849
PPP1R26-AS1	-0.812603	-0.352803	-4.91449	1.20704e-06	1.10212e-05	4.66678
TNFRSF18	-0.883116	3.63154	-4.91393	1.21034e-06	1.10454e-05	4.66416
CBWD1	-0.469606	2.8533	-4.91329	1.21412e-06	1.10727e-05	4.66118
NCOA5	-0.309752	5.24361	-4.9132	1.21463e-06	1.10727e-05	4.66077
C16orf54	-0.935156	1.43081	-4.9114	1.22535e-06	1.11645e-05	4.65236
USP16	-0.313599	5.12231	-4.91104	1.2275e-06	1.11781e-05	4.65068
BTF3	-0.276479	8.54903	-4.90881	1.24088e-06	1.12903e-05	4.6403
GMDS	-0.422453	4.26354	-4.90876	1.24116e-06	1.12903e-05	4.64009
RALB	0.371184	6.61994	4.90618	1.25687e-06	1.14251e-05	4.62804
AKAP7	-0.642873	1.55202	-4.90594	1.25834e-06	1.14251e-05	4.62692
2019-03-03	-0.644898	1.5301	-4.90594	1.25835e-06	1.14251e-05	4.62691
LRRC17	1.20373	1.22188	4.90589	1.25865e-06	1.14251e-05	4.62668
KLK5	2.08985	4.50496	4.90563	1.26024e-06	1.14334e-05	4.62547
DBI	-0.425126	6.88612	-4.90511	1.26344e-06	1.14563e-05	4.62305
ALKBH7	-0.457507	4.49959	-4.90451	1.26712e-06	1.14836e-05	4.62026
NDRG2	-0.708284	5.67632	-4.90386	1.27113e-06	1.15131e-05	4.61724
TRMT44	-0.321537	3.35714	-4.90375	1.27177e-06	1.15131e-05	4.61675
TAF6L	-0.327358	3.62855	-4.90363	1.27253e-06	1.15131e-05	4.61618
RP11-14N7.2	0.744724	-1.18208	4.90343	1.27374e-06	1.15131e-05	4.61527
PRPSAP1	-0.337079	5.23733	-4.90343	1.27375e-06	1.15131e-05	4.61526
MIS18A	-0.421666	3.71482	-4.90309	1.27586e-06	1.1526e-05	4.61368
CYP27B1	0.842339	2.8563	4.90259	1.27899e-06	1.15482e-05	4.61133
VKORC1	0.390356	4.51783	4.90151	1.28568e-06	1.16025e-05	4.60633
EPHX3	-1.7241	2.30922	-4.9004	1.29264e-06	1.16591e-05	4.60116
MUC16	-1.6638	1.83261	-4.90009	1.29463e-06	1.16709e-05	4.59969
PIGN	-0.416535	4.59113	-4.89834	1.30568e-06	1.17642e-05	4.59156
KRT86	-0.851199	0.0170082	-4.89634	1.3184e-06	1.18726e-05	4.58227
CYTH1	-0.331319	6.22111	-4.89497	1.32721e-06	1.19456e-05	4.5759
SOX21-AS1	-1.38567	1.35884	-4.8934	1.33735e-06	1.20305e-05	4.56861
RP11-479G22.8	0.657814	1.52491	4.89318	1.33878e-06	1.2037e-05	4.56759
ARHGAP20	-0.928023	-0.0870931	-4.89304	1.33971e-06	1.2039e-05	4.56692
LYL1	-0.569011	1.33868	-4.8923	1.3445e-06	1.20757e-05	4.56351
GGA3	-0.268368	5.11774	-4.89213	1.34561e-06	1.20793e-05	4.56272
CCDC88B	-0.691323	4.24524	-4.89072	1.35484e-06	1.21557e-05	4.55617
LIN54	-0.396042	3.99821	-4.88938	1.36367e-06	1.22285e-05	4.54995
NARFL	-0.339985	4.56256	-4.88855	1.36919e-06	1.22715e-05	4.54609
ENAH	0.489558	7.40619	4.88679	1.3809e-06	1.23701e-05	4.53793
SCML2	-1.02459	0.104004	-4.88605	1.38584e-06	1.24056e-05	4.53451
HDAC6	-0.342123	5.04178	-4.88598	1.38633e-06	1.24056e-05	4.53418
FAM43B	1.1156	-1.51533	4.8855	1.38958e-06	1.24281e-05	4.53193
DYRK1B	-0.654296	3.62778	-4.88265	1.4089e-06	1.25929e-05	4.51872
TENM3	1.04773	4.01583	4.88256	1.40948e-06	1.25929e-05	4.51832
PGBD2	-0.376476	2.43618	-4.88236	1.41084e-06	1.25984e-05	4.5174
PCGF5	-0.428957	5.07266	-4.88219	1.41203e-06	1.26025e-05	4.51659
GRIPAP1	-0.344128	5.41372	-4.88078	1.42171e-06	1.26822e-05	4.51005
ALDH3A1	-1.57815	5.66686	-4.88032	1.42486e-06	1.27037e-05	4.50793
ASB8	-0.306769	4.43427	-4.87914	1.433e-06	1.27696e-05	4.50248
PAXBP1-AS1	-0.511623	-0.724172	-4.87651	1.45135e-06	1.29263e-05	4.4903
NFX1	-0.35383	5.42377	-4.87627	1.45308e-06	1.2935e-05	4.48916
SMPDL3A	-0.529667	3.27462	-4.87509	1.46137e-06	1.3002e-05	4.48371
TRIM26	-0.334589	6.23096	-4.8729	1.47693e-06	1.31336e-05	4.47358
SMIM3	0.54676	4.77028	4.8702	1.49629e-06	1.32988e-05	4.46111
PHLDB1	0.625999	5.02246	4.8685	1.50867e-06	1.34018e-05	4.45323
RASL11A	-0.772144	1.32677	-4.86768	1.51467e-06	1.34481e-05	4.44943
GNE	-0.650589	4.01899	-4.8667	1.52187e-06	1.3505e-05	4.44489
CRADD	-0.328216	2.85751	-4.86634	1.5245e-06	1.35213e-05	4.44323
KTN1	0.40937	8.14695	4.86502	1.53426e-06	1.36008e-05	4.43713
FANCD2	-0.498317	4.06851	-4.86446	1.53842e-06	1.36306e-05	4.43453
TRMT2B	-0.404014	3.95923	-4.86223	1.55505e-06	1.37707e-05	4.42425
LINC00847	-0.433193	3.09583	-4.86155	1.56011e-06	1.38084e-05	4.42114
CTD-2547G23.4	-0.771202	-0.656618	-4.85994	1.57231e-06	1.39092e-05	4.41368
LIPM	-1.0241	0.128284	-4.85979	1.57344e-06	1.39108e-05	4.413
GFI1	-0.752381	1.09287	-4.8597	1.57413e-06	1.39108e-05	4.41258
EHD4	0.331901	6.56213	4.85904	1.57913e-06	1.39478e-05	4.40954
LRG1	-1.1319	3.57764	-4.85773	1.58915e-06	1.4029e-05	4.40349
C2CD5	-0.443404	4.70498	-4.85687	1.59579e-06	1.40803e-05	4.3995
NBL1	0.482305	5.99992	4.85607	1.60192e-06	1.41225e-05	4.39583
ZNF852	-0.433407	-0.267062	-4.85603	1.60223e-06	1.41225e-05	4.39564
FBF1	-0.311247	-1.80934	-4.85556	1.60583e-06	1.41469e-05	4.39349
APP	0.434113	9.68027	4.85543	1.60684e-06	1.41485e-05	4.3929
PAN2	-0.454896	4.30022	-4.85226	1.63164e-06	1.43525e-05	4.37824
KNTC1	-0.50299	4.71317	-4.85225	1.6317e-06	1.43525e-05	4.37821
TMEM129	-0.364788	5.04372	-4.85169	1.63613e-06	1.43805e-05	4.37561
MRPL38	-0.365614	2.55892	-4.85163	1.63656e-06	1.43805e-05	4.37536
GFPT2	0.82517	3.76556	4.8515	1.6376e-06	1.43812e-05	4.37475
MADD	-0.324892	5.37468	-4.85141	1.63833e-06	1.43812e-05	4.37432
CTD-2574D22.3	-0.762787	-0.939721	-4.85061	1.64463e-06	1.4429e-05	4.37065
LINC00957	-0.662364	0.305539	-4.85002	1.64927e-06	1.44623e-05	4.36795
ADAMTS4	0.732574	4.32835	4.84919	1.65591e-06	1.45131e-05	4.36411
MDM2	-0.427802	5.98381	-4.84847	1.66169e-06	1.45563e-05	4.36078
C1orf115	-0.803847	2.82106	-4.84802	1.66523e-06	1.45797e-05	4.35874
TMEM161B	-0.427233	3.08235	-4.84774	1.66754e-06	1.45925e-05	4.35742
CAPN14	-1.49646	0.876058	-4.84633	1.67883e-06	1.46837e-05	4.35096
SREK1	-0.321267	5.40547	-4.84527	1.68745e-06	1.47516e-05	4.34606
AC074289.1	-0.943855	-0.871439	-4.84466	1.69238e-06	1.4787e-05	4.34327
BOK	0.442047	5.025	4.84422	1.69597e-06	1.48109e-05	4.34124
TECPR1	-0.364834	4.4667	-4.84365	1.70068e-06	1.48444e-05	4.33858
MCIDAS	-0.952335	-1.34381	-4.84343	1.70249e-06	1.48525e-05	4.33757
INPP5J	-0.810445	1.47185	-4.84316	1.7047e-06	1.48642e-05	4.33633
EXPH5	-0.663885	3.55308	-4.84304	1.70561e-06	1.48646e-05	4.33582
SUZ12P1	-0.521083	1.89776	-4.84291	1.70669e-06	1.48664e-05	4.33521
ZNF20	-0.553563	-1.70051	-4.84177	1.71608e-06	1.49405e-05	4.32996
SATB1	-0.688244	3.4282	-4.84084	1.72382e-06	1.50002e-05	4.32566
LINC01270	0.632755	-1.05793	4.83821	1.74574e-06	1.51832e-05	4.31357
PARP16	-0.394632	3.15131	-4.83791	1.74825e-06	1.51973e-05	4.31219
AC022007.5	-0.560945	-0.186354	-4.8377	1.74996e-06	1.52044e-05	4.31126
EFCAB6	-0.835388	-1.09637	-4.83686	1.75709e-06	1.52585e-05	4.30737
LINC00152	0.561153	3.40498	4.83567	1.76714e-06	1.5338e-05	4.30191
SLC22A15	0.629358	2.29268	4.8351	1.77203e-06	1.53726e-05	4.29927
GLT8D2	0.77996	2.73959	4.83447	1.77738e-06	1.54112e-05	4.29639
LDHA	0.408367	10.061	4.83329	1.7875e-06	1.5491e-05	4.29096
FURIN	0.377299	7.60085	4.83306	1.78942e-06	1.54998e-05	4.28993
ABHD11	-0.547601	4.09678	-4.83295	1.7904e-06	1.55004e-05	4.2894
CTC-534A2.2	-0.413611	0.699891	-4.83148	1.80307e-06	1.56022e-05	4.28266
PPM1M	-0.453324	3.61519	-4.83054	1.81121e-06	1.56605e-05	4.27835
RP11-228B15.4	-0.673133	-0.613319	-4.83049	1.81165e-06	1.56605e-05	4.27812
MAP7D2	-1.76168	-0.395359	-4.82981	1.81755e-06	1.57004e-05	4.27501
CAMK4	-0.819723	1.55462	-4.82975	1.8181e-06	1.57004e-05	4.27472
CENPM	-0.57092	3.57721	-4.82957	1.81968e-06	1.57009e-05	4.27389
HEYL	0.678136	3.07917	4.82953	1.82e-06	1.57009e-05	4.27372
LPCAT1	0.493814	6.1803	4.82906	1.8241e-06	1.57232e-05	4.27157
PRR29	-0.607239	-0.439842	-4.82902	1.82444e-06	1.57232e-05	4.27139
RNF167	-0.261579	6.56244	-4.82885	1.82596e-06	1.57284e-05	4.27059
DISP2	1.03885	1.05317	4.82852	1.82882e-06	1.5745e-05	4.2691
MDM4	-0.436568	4.22699	-4.825	1.86001e-06	1.60055e-05	4.25292
FBXL17	-0.413898	4.04158	-4.82315	1.87657e-06	1.61398e-05	4.24444
C16orf87	0.343541	3.1173	4.82297	1.87822e-06	1.61458e-05	4.2436
IDNK	-0.481286	1.02785	-4.82285	1.8793e-06	1.6147e-05	4.24305
KDELR1	0.228116	7.46356	4.82167	1.88989e-06	1.62298e-05	4.23767
CRNN	-2.53753	2.11051	-4.82111	1.89497e-06	1.62652e-05	4.23511
NFYB	-0.339094	4.41141	-4.82028	1.90251e-06	1.63217e-05	4.23131
RSPH9	-0.374817	-0.735066	-4.8199	1.90597e-06	1.63432e-05	4.22957
RGAG4	-0.862569	0.820501	-4.81908	1.91348e-06	1.63994e-05	4.22581
HCST	-0.769275	1.285	-4.8186	1.91791e-06	1.6429e-05	4.2236
CORO6	1.21589	2.50498	4.81809	1.92263e-06	1.64612e-05	4.22125
GDA	-1.97223	0.237545	-4.81763	1.92689e-06	1.64893e-05	4.21914
CNKSR3	-0.51487	4.28843	-4.81636	1.93858e-06	1.65796e-05	4.21335
C3orf58	-0.706434	4.74654	-4.81628	1.93937e-06	1.65796e-05	4.21296
CRIP1	-0.55101	-1.83373	-4.81513	1.95003e-06	1.66563e-05	4.20772
ZNF582	-0.763317	-1.33404	-4.8151	1.9503e-06	1.66563e-05	4.20758
AF127936.9	0.654312	0.958872	4.81488	1.95238e-06	1.66656e-05	4.20657
RAI2	-0.890216	1.24531	-4.81424	1.9584e-06	1.67087e-05	4.20362
CCHCR1	-0.478176	4.62702	-4.81379	1.96255e-06	1.67328e-05	4.2016
SRGAP3	-0.611746	2.95572	-4.81362	1.96415e-06	1.67328e-05	4.20082
[truncated: 15,039 more rows]

## Sheet: C1-C3
Supplementary Table 2. Differentially expressed genes of intersection in TME cluster-1, -2 and -3.
	logFC	AveExpr	t	P.Value	adj.P.Val	B
CD79A	2.8845	1.9088	12.4948	2.19809e-31	3.7451e-27	60.3373
ANKRD36BP2	2.65317	-0.830764	11.9354	4.4141e-29	3.76037e-25	55.1455
DERL3	2.17815	3.26426	11.6873	4.44222e-28	2.52289e-24	52.8852
MZB1	2.68305	2.66774	11.4905	2.72187e-27	1.15938e-23	51.1108
CPNE5	1.26807	2.03196	11.2675	2.07811e-26	6.59668e-23	49.1215
KIAA0125	2.57115	-0.75893	11.2552	2.32305e-26	6.59668e-23	49.0124
CD19	2.3642	-0.90815	11.0797	1.13059e-25	2.75187e-22	47.464
PIM2	1.33726	4.41135	10.914	4.97022e-25	1.01671e-21	46.0153
MEI1	2.12692	1.20922	10.9052	5.3706e-25	1.01671e-21	45.9395
CTA-292E10.9	1.01989	1.38223	10.8455	9.12664e-25	1.49207e-21	45.4208
FCRL5	2.83214	0.318331	10.8394	9.63302e-25	1.49207e-21	45.368
IGLV1-51	3.15401	2.90194	10.8055	1.30035e-24	1.84628e-21	45.0745
POU2AF1	2.14587	2.55882	10.7372	2.37656e-24	3.11476e-21	44.4846
IGLC2	2.89792	5.48871	10.688	3.66254e-24	4.45731e-21	44.0616
IGKC	3.01664	8.69283	10.6622	4.59122e-24	5.21501e-21	43.8406
IGHA1	3.23562	7.86734	10.6474	5.2277e-24	5.56685e-21	43.7136
TNFRSF13C	1.72417	0.823924	10.4687	2.48193e-23	2.48748e-20	42.1903
IGHV1-69	3.40084	-0.0386164	10.3977	4.5865e-23	4.34138e-20	41.5899
IGKV3D-20	3.19902	-0.316789	10.3826	5.22491e-23	4.68537e-20	41.4624
IGHG3	2.8853	6.41118	10.2253	2.0156e-22	1.71709e-19	40.1425
IGKV3-11	2.96273	4.5406	10.215	2.20208e-22	1.78662e-19	40.056
IGLL5	3.0211	3.76228	10.1838	2.87195e-22	2.2242e-19	39.7964
IGLV2-11	3.21426	2.11591	10.1135	5.21987e-22	3.86679e-19	39.2124
IGKV1-6	3.19312	0.78025	10.0714	7.45748e-22	5.29419e-19	38.8637
IGJ	2.66608	4.82902	10.0373	9.94807e-22	6.77981e-19	38.5821
IGHD	3.53895	0.603593	10.03	1.05843e-21	6.93597e-19	38.5215
IGLV3-1	3.08036	2.03376	9.92255	2.61193e-21	1.58682e-18	37.6388
IGKV3-20	2.94459	4.45045	9.92007	2.6668e-21	1.58682e-18	37.6185
IGLV4-69	3.23185	1.08121	9.91855	2.70089e-21	1.58682e-18	37.606
SEC11C	0.740737	4.51571	9.90628	2.99321e-21	1.6998e-18	37.5056
IGLC3	2.75579	4.77133	9.90237	3.09272e-21	1.6998e-18	37.4737
IGHG2	2.84688	7.16774	9.86716	4.15059e-21	2.196e-18	37.1862
IGKV1-5	2.96545	4.1119	9.86424	4.25332e-21	2.196e-18	37.1623
IGHV3-53	3.05813	0.00229444	9.84444	5.01678e-21	2.51399e-18	37.001
IGHG4	3.14764	6.03798	9.81986	6.15646e-21	2.99697e-18	36.801
IGLV3-19	3.14832	2.59448	9.81391	6.46895e-21	3.06161e-18	36.7526
IGHV4-59	3.16097	2.18203	9.78497	8.22743e-21	3.78862e-18	36.5177
IGLV7-46	2.95162	-0.133974	9.77302	9.08542e-21	4.07362e-18	36.4208
IGHM	2.86301	5.16447	9.76454	9.74733e-21	4.25833e-18	36.3521
IGLV1-47	3.07369	2.18278	9.70726	1.56572e-20	6.6692e-18	35.8891
IGHA2	3.25197	5.28576	9.67511	2.04124e-20	8.48258e-18	35.6301
IGHV1-2	3.32025	1.45321	9.67137	2.10502e-20	8.53937e-18	35.6
IGHGP	2.71708	3.89379	9.61516	3.3418e-20	1.32413e-17	35.1486
IGLV3-21	3.16661	3.77417	9.61187	3.43318e-20	1.32942e-17	35.1222
IGKV3-15	2.83194	2.77037	9.60775	3.55137e-20	1.34463e-17	35.0892
IGLV2-8	3.10285	1.11597	9.56175	5.17572e-20	1.91704e-17	34.7213
IGHV4-31	3.06614	0.693197	9.55123	5.64028e-20	2.04466e-17	34.6374
IGHG1	2.76868	9.52793	9.53196	6.60108e-20	2.34311e-17	34.4838
IGLV3-10	3.30573	0.862894	9.51911	7.33027e-20	2.54884e-17	34.3814
IGLV3-9	3.13112	-0.147502	9.472	1.07553e-19	3.66498e-17	34.0071
IGHV1-24	3.16043	1.25711	9.45456	1.23905e-19	4.13938e-17	33.8689
IGHV5-51	3.12262	3.04531	9.4509	1.27641e-19	4.1822e-17	33.8399
IGLV3-25	2.9918	2.73622	9.4424	1.36756e-19	4.39631e-17	33.7725
IGHV3-48	2.93332	0.0542116	9.43593	1.44117e-19	4.54716e-17	33.7213
IGHV1-69-2	3.16085	1.58958	9.39268	2.04478e-19	6.26519e-17	33.3798
MGAT3	1.96283	1.38539	9.39181	2.05922e-19	6.26519e-17	33.3729
IGHV4-34	2.92789	1.57224	9.37899	2.28374e-19	6.82638e-17	33.2718
IGHV3-11	3.03658	1.7244	9.35314	2.81286e-19	8.14349e-17	33.0684
IGLV2-23	2.95929	2.98651	9.35283	2.81997e-19	8.14349e-17	33.0659
IGLV6-57	2.95577	2.17613	9.34737	2.94673e-19	8.36772e-17	33.023
IGKV4-1	2.87781	4.21421	9.32412	3.55264e-19	9.92294e-17	32.8405
IGHV3-74	2.88579	1.62161	9.26834	5.55715e-19	1.52714e-16	32.4037
IGKV1-27	3.02923	0.665747	9.21685	8.38542e-19	2.26779e-16	32.0022
IGKV1-16	3.02482	0.895856	9.21462	8.53526e-19	2.27225e-16	31.9849
IGLV1-40	2.90559	3.30166	9.19893	9.67215e-19	2.53529e-16	31.8629
FAM46C	1.59195	3.26989	9.18775	1.05726e-18	2.72934e-16	31.776
IGHV3-30	2.79799	2.19844	9.18107	1.1149e-18	2.83518e-16	31.7242
IGLV2-14	2.87316	3.28005	9.16448	1.27206e-18	3.18726e-16	31.5955
CD79B	1.40473	1.04773	9.12322	1.76444e-18	4.35689e-16	31.2762
GNG7	1.22433	0.766919	9.10367	2.05962e-18	5.01311e-16	31.1252
NUGGC	1.62815	-1.23827	9.08694	2.35051e-18	5.64057e-16	30.9963
IGHV3-33	2.87237	1.27834	9.0582	2.94874e-18	6.97786e-16	30.7751
IGKV1-9	2.94962	1.55396	9.05356	3.05836e-18	7.1162e-16	30.7395
KATNAL2	1.52031	-0.146184	9.05222	3.09073e-18	7.1162e-16	30.7292
IGLV7-43	2.84608	-0.319115	9.04428	3.29011e-18	7.47425e-16	30.6682
IGKV1-17	2.95676	0.830461	9.03791	3.45917e-18	7.75491e-16	30.6193
ZMYND10	1.39676	-1.56104	9.00021	4.65149e-18	1.02925e-15	30.3304
IGHV1-46	2.87202	1.83306	8.93768	7.5871e-18	1.6573e-15	29.8531
MIR600HG	1.38026	1.14038	8.92922	8.10433e-18	1.74787e-15	29.7888
BZRAP1	1.57606	1.5062	8.919	8.7765e-18	1.84834e-15	29.7111
FBLIM1	-0.883617	6.81762	-8.91885	8.78714e-18	1.84834e-15	29.7099
PRNP	-0.814533	8.38573	-8.86241	1.36282e-17	2.83167e-15	29.2819
IGHV3-49	2.86781	0.996157	8.79296	2.33243e-17	4.78794e-15	28.7578
DCBLD1	-0.963071	5.19598	-8.78027	2.57215e-17	5.16318e-15	28.6624
HID1	1.35328	2.52381	8.78009	2.57583e-17	5.16318e-15	28.661
IGLV8-61	3.11587	-0.018555	8.77595	2.65932e-17	5.26855e-15	28.6299
ARSI	-1.63586	4.22972	-8.76233	2.95328e-17	5.78369e-15	28.5277
IGHV4-39	2.91947	2.69447	8.69923	4.79387e-17	9.28158e-15	28.0554
FAM3B	3.01254	0.19318	8.69606	4.91174e-17	9.40294e-15	28.0317
IGKV2-24	2.7841	0.111381	8.6567	6.63528e-17	1.25613e-14	27.7385
IGLV1-44	2.76688	2.57692	8.64597	7.20101e-17	1.34825e-14	27.6588
COLCA1	2.38238	-0.150856	8.633	7.94932e-17	1.47218e-14	27.5624
IGHV3-73	2.9693	-0.011054	8.59619	1.05162e-16	1.92662e-14	27.2896
HLF	1.95896	1.80621	8.58611	1.13525e-16	2.0577e-14	27.2151
IGHV1-18	2.80818	2.75901	8.57848	1.20286e-16	2.13938e-14	27.1587
IGHV3-23	2.64191	3.35531	8.5782	1.20542e-16	2.13938e-14	27.1566
MS4A1	2.34829	-0.583755	8.4427	3.34733e-16	5.87956e-14	26.1614
FXYD5	-0.931144	6.8267	-8.43401	3.57233e-16	6.21075e-14	26.098
SLC25A23	1.02962	5.04893	8.4224	3.89675e-16	6.70634e-14	26.0133
CHDH	1.87703	0.355725	8.4104	4.26256e-16	7.26255e-14	25.9259
PLAU	-1.0654	7.86256	-8.40892	4.30986e-16	7.27044e-14	25.9151
MCF2L	1.32937	3.2743	8.40103	4.57141e-16	7.63605e-14	25.8578
CDH3	-1.05695	8.82179	-8.39706	4.70918e-16	7.78981e-14	25.8288
TNFRSF12A	-0.956326	6.3121	-8.36275	6.08116e-16	9.96258e-14	25.5798
GNB3	1.3332	-1.26348	8.32967	7.77589e-16	1.26177e-13	25.3403
IGHV2-26	2.80449	-0.393566	8.27238	1.18828e-15	1.90999e-13	24.9273
SVIP	1.5371	1.69327	8.27107	1.19982e-15	1.91052e-13	24.9179
IGHV3-15	2.68114	2.09726	8.24715	1.43128e-15	2.25798e-13	24.7462
KHK	1.20711	1.78429	8.20965	1.88587e-15	2.92628e-13	24.4776
COCH	2.30039	-0.471185	8.20938	1.88957e-15	2.92628e-13	24.4757
PPP1R3E	0.779601	2.30717	8.20817	1.90643e-15	2.92628e-13	24.467
IGHV3-21	2.70427	1.919	8.16753	2.56778e-15	3.90624e-13	24.1771
CAMK2N1	-1.15672	3.99098	-8.15302	2.85514e-15	4.30494e-13	24.0738
INHBA	-1.59667	6.11868	-8.12173	3.58706e-15	5.36108e-13	23.8517
THSD1	-1.20679	3.92758	-8.10903	3.93467e-15	5.82948e-13	23.7617
ITGA5	-1.04744	7.24467	-8.10324	4.10388e-15	6.02775e-13	23.7207
WNK2	2.51817	2.73885	8.09148	4.47008e-15	6.50951e-13	23.6375
RTN4	-0.459501	8.2147	-8.0897	4.52818e-15	6.53822e-13	23.6249
RALGPS1	1.02739	2.13781	8.06528	5.40602e-15	7.74015e-13	23.4525
ITGA3	-1.05476	8.67684	-8.0559	5.78607e-15	8.21525e-13	23.3863
RP1-152L7.5	1.84965	1.04147	8.05241	5.9341e-15	8.3558e-13	23.3618
FAM222A	1.11607	1.66543	8.044	6.30622e-15	8.80699e-13	23.3026
TGFBI	-1.36739	9.04478	-8.02839	7.05925e-15	9.7785e-13	23.1928
DDX60L	-0.942977	4.81472	-8.02059	7.46846e-15	1.02619e-12	23.138
METTL7A	1.25291	4.03473	8.0026	8.50271e-15	1.15895e-12	23.0118
MT2P1	-1.37959	-0.664926	-7.9804	9.97548e-15	1.34891e-12	22.8563
ZMAT1	1.60297	-0.341956	7.97342	1.0489e-14	1.40718e-12	22.8075
ARHGEF26	2.08159	1.69273	7.96998	1.07515e-14	1.43112e-12	22.7835
KLF15	1.57007	-1.14481	7.96843	1.08714e-14	1.43586e-12	22.7727
LINC00926	1.17321	-0.720352	7.94963	1.24422e-14	1.63069e-12	22.6414
ACTN1	-0.82066	8.66078	-7.93791	1.35322e-14	1.76001e-12	22.5597
SSR4	0.579488	6.99769	7.93147	1.41701e-14	1.82901e-12	22.5149
REPIN1	0.87073	5.27652	7.92256	1.51023e-14	1.93468e-12	22.4529
FCRLA	1.58147	-0.390864	7.91595	1.58341e-14	2.01329e-12	22.4069
TNFRSF1A	-0.377453	7.50005	-7.8929	1.86656e-14	2.35573e-12	22.2468
IFIT3	-1.40137	5.90339	-7.88355	1.99515e-14	2.49951e-12	22.182
SERPINE1	-1.37587	7.76794	-7.88188	2.0191e-14	2.51106e-12	22.1704
TRPV6	2.05294	-0.968118	7.85966	2.36492e-14	2.91982e-12	22.0167
HTR7	-1.6941	2.33256	-7.84633	2.59973e-14	3.18663e-12	21.9246
STXBP6	1.90831	-0.119627	7.84244	2.67247e-14	3.2524e-12	21.8978
SLC16A11	1.41397	-0.734603	7.81639	3.2145e-14	3.8843e-12	21.7182
MT2A	-1.30666	8.14096	-7.80858	3.39703e-14	4.07596e-12	21.6645
WARS	-1.19101	8.43721	-7.80675	3.44129e-14	4.10018e-12	21.6519
AC007879.7	-1.24984	1.04179	-7.80446	3.49762e-14	4.13836e-12	21.6361
INTS10	0.511872	5.4446	7.79478	3.74521e-14	4.40075e-12	21.5696
HERPUD1	0.573675	6.16983	7.79123	3.84043e-14	4.48173e-12	21.5452
MYO1B	-0.841684	7.65368	-7.78572	3.99254e-14	4.62755e-12	21.5074
RP11-65J21.3	-1.11495	-0.0368759	-7.77352	4.35155e-14	5.00958e-12	21.4237
STAG3	1.80037	1.03175	7.76809	4.52104e-14	5.16976e-12	21.3865
RP13-463N16.6	-1.53722	0.19708	-7.76366	4.66461e-14	5.29837e-12	21.3562
SYNGR1	1.25944	3.30137	7.76002	4.7856e-14	5.3998e-12	21.3313
TLDC1	-0.718498	5.74225	-7.72574	6.08941e-14	6.82575e-12	21.097
C2orf88	1.03816	0.0751911	7.72159	6.26918e-14	6.98132e-12	21.0687
VEGFC	-1.46043	3.67332	-7.71378	6.6221e-14	7.32645e-12	21.0155
CYP4X1	1.90262	1.39888	7.70602	6.99219e-14	7.686e-12	20.9626
FER1L4	1.38094	0.719518	7.69883	7.35306e-14	8.03086e-12	20.9137
LINC01125	1.07536	-1.02169	7.69517	7.54367e-14	8.18656e-12	20.8889
FSCN1	-0.680214	9.21951	-7.69171	7.72872e-14	8.3343e-12	20.8653
IL17RB	1.15041	0.736559	7.69032	7.80386e-14	8.3624e-12	20.8559
PDE4C	1.46462	-1.01087	7.68564	8.06379e-14	8.55879e-12	20.8241
CBX7	0.94763	3.69024	7.68521	8.0876e-14	8.55879e-12	20.8212
SPAG4	0.96516	1.55189	7.68407	8.15241e-14	8.57413e-12	20.8134
CTB-58E17.1	0.828444	0.967146	7.682	8.27159e-14	8.6461e-12	20.7993
PODXL2	1.95471	2.92911	7.67833	8.48621e-14	8.81634e-12	20.7744
DSE	-0.796119	5.9894	-7.67689	8.57173e-14	8.85122e-12	20.7647
FBXO25	0.56836	4.44692	7.66008	9.63874e-14	9.89307e-12	20.6507
FRZB	1.33368	0.965687	7.64623	1.06147e-13	1.07732e-11	20.5569
SMPDL3B	1.44976	0.983654	7.64613	1.06227e-13	1.07732e-11	20.5562
DFNA5	-0.983074	4.93278	-7.62763	1.2081e-13	1.21155e-11	20.4312
PPAPDC1B	0.794869	4.09617	7.62754	1.20885e-13	1.21155e-11	20.4306
PRDM15	0.562929	3.45556	7.61693	1.30128e-13	1.29656e-11	20.359
ASRGL1	1.33346	0.564263	7.61527	1.31637e-13	1.29656e-11	20.3478
OLMALINC	0.82852	1.62001	7.61526	1.3165e-13	1.29656e-11	20.3477
USB1	-0.487578	6.34883	-7.6066	1.39801e-13	1.36892e-11	20.2893
TUBB6	-0.704265	7.71704	-7.60089	1.4544e-13	1.41601e-11	20.2509
H1FX-AS1	1.05183	-0.455205	7.58558	1.61706e-13	1.56542e-11	20.1479
PIAS2	0.652655	3.87599	7.58185	1.65938e-13	1.58541e-11	20.1228
FAM221A	1.30387	0.235605	7.58184	1.6595e-13	1.58541e-11	20.1227
GPLD1	1.53953	-0.870024	7.58131	1.66562e-13	1.58541e-11	20.1191
WNK3	1.72472	-0.999006	7.56754	1.83186e-13	1.73396e-11	20.0267
TAS1R3	1.2172	0.331424	7.56662	1.84357e-13	1.7354e-11	20.0205
TSGA10	0.760281	0.659676	7.56553	1.85757e-13	1.73897e-11	20.0132
MYO5C	1.48621	2.54782	7.55853	1.94948e-13	1.81504e-11	19.9663
CRYM	1.6068	-0.961852	7.55161	2.0448e-13	1.89344e-11	19.9199
SYCP2	1.96201	0.723924	7.54918	2.07932e-13	1.91499e-11	19.9036
DANCR	0.942392	4.34443	7.54298	2.17019e-13	1.98794e-11	19.8621
ACBD4	0.726921	1.82565	7.53984	2.21758e-13	2.02049e-11	19.8411
KLF3-AS1	1.00645	-1.14447	7.53856	2.23723e-13	2.02755e-11	19.8325
LINC01116	-1.28241	1.48111	-7.5223	2.50209e-13	2.25558e-11	19.7238
ATP2A3	0.921107	4.57418	7.52033	2.53626e-13	2.27436e-11	19.7106
LAX1	1.37713	0.313826	7.5075	2.76996e-13	2.47092e-11	19.625
PXN	-0.640423	7.22973	-7.49664	2.98416e-13	2.64813e-11	19.5527
CLU	1.48371	6.17539	7.49496	3.0188e-13	2.66499e-11	19.5415
TXNDC11	0.345706	5.55383	7.48476	3.23721e-13	2.84307e-11	19.4736
IFIT1	-1.48376	5.3127	-7.48275	3.28213e-13	2.85619e-11	19.4603
LINC00941	-1.58814	0.553504	-7.48259	3.28567e-13	2.85619e-11	19.4592
GDF7	1.2533	-1.47295	7.47852	3.37865e-13	2.9221e-11	19.4321
NEXN	-1.27466	3.09894	-7.46664	3.66455e-13	3.15336e-11	19.3532
IFITM3	-0.802864	8.84845	-7.46562	3.69024e-13	3.15952e-11	19.3464
CCR10	1.22633	-1.47569	7.45699	3.91444e-13	3.33471e-11	19.2892
GBP1	-1.16069	6.65432	-7.45123	4.07148e-13	3.45124e-11	19.251
RP11-423H2.3	1.35254	-1.45316	7.44855	4.14661e-13	3.49752e-11	19.2332
ATP6V0E2	1.18755	2.5525	7.42048	5.02068e-13	4.19364e-11	19.0475
AMIGO2	-1.2139	4.45446	-7.42047	5.02115e-13	4.19364e-11	19.0474
CAV1	-1.15313	7.9745	-7.41707	5.13863e-13	4.27083e-11	19.0249
SLC27A5	1.12573	1.63729	7.41401	5.24638e-13	4.33921e-11	19.0048
YBX2	2.34124	-0.394115	7.41041	5.3767e-13	4.42551e-11	18.981
LINC00704	-1.60285	-0.522484	-7.40958	5.40697e-13	4.42903e-11	18.9755
GP1BA	1.09382	-0.991652	7.38655	6.32185e-13	5.15367e-11	18.8237
EPHB6	1.30397	3.59826	7.385	6.38855e-13	5.18324e-11	18.8135
GDA	2.77936	0.237545	7.38212	6.5145e-13	5.26038e-11	18.7946
ABCA3	1.59229	2.39385	7.38061	6.58172e-13	5.28959e-11	18.7846
C4orf19	1.83069	-0.575499	7.37494	6.83926e-13	5.47076e-11	18.7474
ZNF775	0.65494	2.78393	7.3735	6.90633e-13	5.4986e-11	18.7379
MAGIX	0.783826	1.00276	7.35852	7.64316e-13	6.0296e-11	18.6395
RP11-395L14.18	0.936294	-1.44193	7.3585	7.64405e-13	6.0296e-11	18.6394
MEIS1	0.85284	3.39119	7.35424	7.86713e-13	6.17697e-11	18.6115
ZNF397	0.624709	3.70464	7.344	8.43044e-13	6.58889e-11	18.5443
KLHDC9	1.47782	-0.824762	7.32352	9.67905e-13	7.53021e-11	18.4103
PPM1H	1.3746	1.58	7.32251	9.74484e-13	7.54694e-11	18.4037
CD22	1.28441	0.298988	7.32135	9.82187e-13	7.57217e-11	18.3961
AF131215.9	1.22439	-0.54784	7.31361	1.03467e-12	7.94086e-11	18.3455
SEMA3C	-1.15572	5.96818	-7.31286	1.03991e-12	7.94525e-11	18.3406
RP11-111M22.2	1.04442	-1.04725	7.30452	1.09994e-12	8.36645e-11	18.2862
ADAMTS17	0.9961	1.85285	7.3025	1.11496e-12	8.38474e-11	18.273
CPA4	-1.95987	3.93631	-7.30244	1.11539e-12	8.38474e-11	18.2726
C2orf15	0.771375	-1.32135	7.30221	1.11711e-12	8.38474e-11	18.2711
IFIT5	-0.697772	4.5658	-7.2901	1.21178e-12	9.05536e-11	18.1922
RGS20	-1.2598	2.70464	-7.28816	1.22766e-12	9.13399e-11	18.1796
ZBED3	1.03018	1.80623	7.28236	1.27639e-12	9.45526e-11	18.1418
NT5E	-1.34585	4.85051	-7.27916	1.30403e-12	9.58514e-11	18.121
ZNF554	0.682143	1.56104	7.27903	1.30517e-12	9.58514e-11	18.1201
C22orf39	0.467776	3.79065	7.2533	1.55047e-12	1.13378e-10	17.953
C9orf116	0.859301	-0.0599786	7.24953	1.59008e-12	1.15777e-10	17.9286
MAP7D1	-0.519366	7.88658	-7.24027	1.69158e-12	1.22643e-10	17.8685
MFSD4	1.76654	1.14788	7.22703	1.84773e-12	1.33397e-10	17.7829
FN3K	1.01458	1.8793	7.22574	1.86374e-12	1.335e-10	17.7745
FOXP2	1.59689	2.12873	7.22565	1.86482e-12	1.335e-10	17.7739
RABL2A	0.809869	1.41886	7.21953	1.94243e-12	1.38473e-10	17.7344
CAPS	1.04643	2.40191	7.21613	1.98697e-12	1.41059e-10	17.7124
MSN	-0.650671	9.43165	-7.21325	2.02545e-12	1.43193e-10	17.6938
IGSF9	0.925566	5.31887	7.20874	2.08714e-12	1.46945e-10	17.6647
SMIM3	-0.743122	4.77028	-7.19735	2.25139e-12	1.57857e-10	17.5912
MYB	1.4387	1.0825	7.19141	2.34187e-12	1.63528e-10	17.553
PRR36	1.42892	-0.305336	7.18914	2.37744e-12	1.65334e-10	17.5383
PDE6B	1.40992	-0.184161	7.18359	2.46671e-12	1.70845e-10	17.5026
SLC1A2	1.43021	-1.32487	7.18174	2.49711e-12	1.7225e-10	17.4907
RAB31	-0.650551	7.17903	-7.17904	2.54227e-12	1.74658e-10	17.4733
SLC35F6	-0.357991	6.22758	-7.17701	2.57684e-12	1.76322e-10	17.4602
P4HTM	0.894136	3.03471	7.17619	2.59089e-12	1.76574e-10	17.455
ICA1	1.17026	1.45439	7.16883	2.72034e-12	1.84658e-10	17.4077
PARD6A	0.97339	0.415941	7.16672	2.7586e-12	1.86512e-10	17.3941
SCML2	1.38202	0.104004	7.16609	2.77011e-12	1.8655e-10	17.3901
EAF2	0.728715	1.56253	7.16464	2.79687e-12	1.8761e-10	17.3808
GCHFR	1.06313	0.89504	7.15175	3.04588e-12	2.03513e-10	17.298
GTF2IRD2	0.752782	-0.347206	7.14984	3.08454e-12	2.04955e-10	17.2858
ACSS1	0.94182	4.65124	7.1495	3.09153e-12	2.04955e-10	17.2836
RP11-983P16.4	0.864864	0.958938	7.14572	3.16986e-12	2.09334e-10	17.2593
EPSTI1	-1.10249	5.07457	-7.14085	3.27345e-12	2.1534e-10	17.2282
KIAA1683	1.29296	-0.134935	7.1399	3.29404e-12	2.15861e-10	17.2221
FUZ	0.974302	2.47689	7.12681	3.59115e-12	2.3367e-10	17.1383
OAS2	-1.01214	7.1622	-7.12672	3.59323e-12	2.3367e-10	17.1378
PARP16	0.534483	3.15131	7.12462	3.6434e-12	2.36031e-10	17.1243
ALKBH7	0.610675	4.49959	7.11821	3.80076e-12	2.45293e-10	17.0833
TIGD3	0.965664	-0.987846	7.11425	3.90117e-12	2.50823e-10	17.058
GRIN2C	1.22309	-0.746465	7.11082	3.99023e-12	2.55409e-10	17.0362
LINC00342	1.19362	0.935223	7.11035	4.00247e-12	2.55409e-10	17.0332
BEND5	1.40403	-1.07992	7.10687	4.09519e-12	2.6035e-10	17.011
RHBDL3	1.54488	-0.153268	7.10527	4.1387e-12	2.62138e-10	17.0007
WFDC2	2.50379	2.23272	7.09417	4.45208e-12	2.80943e-10	16.93
TRAF3IP2	-0.420395	5.98287	-7.09327	4.47829e-12	2.81554e-10	16.9243
MROH8	0.776066	-0.46392	7.09208	4.5134e-12	2.82718e-10	16.9167
SCAMP5	0.946763	2.5319	7.09143	4.53284e-12	2.82896e-10	16.9125
CREB3L4	0.760041	2.98248	7.08573	4.7056e-12	2.92606e-10	16.8763
SH3BGRL2	1.27445	2.84278	7.07966	4.89709e-12	3.03406e-10	16.8376
FAM171A1	1.24431	2.85546	7.07771	4.95997e-12	3.06188e-10	16.8252
HCN3	0.714842	1.77366	7.07511	5.04539e-12	3.10337e-10	16.8087
CMAHP	0.994568	1.477	7.07218	5.14306e-12	3.15207e-10	16.7901
MMP1	-1.7703	7.88757	-7.07039	5.20394e-12	3.17795e-10	16.7787
ARSG	0.700692	2.05179	7.06136	5.52108e-12	3.35957e-10	16.7213
RPS6KL1	1.2364	0.282333	7.0605	5.55213e-12	3.36215e-10	16.7159
COLCA2	1.55519	-0.164199	7.06015	5.56477e-12	3.36215e-10	16.7137
RP11-305K5.1	0.986571	-0.567917	7.0591	5.60322e-12	3.37341e-10	16.707
MAP7D2	2.36407	-0.395359	7.04738	6.04985e-12	3.62949e-10	16.6327
SYP	0.941826	-0.30163	7.03539	6.54273e-12	3.91141e-10	16.5568
LRRC48	0.672388	0.819239	7.02946	6.80099e-12	4.05158e-10	16.5192
BAK1	-0.547564	5.87108	-7.02876	6.83183e-12	4.05577e-10	16.5148
AC113189.5	0.83452	1.94246	7.0266	6.9287e-12	4.09315e-10	16.5012
CNTD1	0.936464	-0.752832	7.02629	6.94283e-12	4.09315e-10	16.4992
ALDH6A1	0.727878	3.47834	7.01709	7.37218e-12	4.33128e-10	16.4411
CXCL11	-1.98046	3.06344	-7.01483	7.48148e-12	4.3804e-10	16.4268
LIMA1	-0.646733	7.72285	-7.01414	7.51489e-12	4.38489e-10	16.4225
LRRC4B	1.13148	-0.494569	7.01166	7.63714e-12	4.44101e-10	16.4068
FOXRED2	0.896985	4.92703	7.0086	7.79123e-12	4.51444e-10	16.3875
GGA2	0.560639	6.10026	7.0081	7.81641e-12	4.51444e-10	16.3844
LINC00925	1.69091	1.36288	7.00576	7.93651e-12	4.56832e-10	16.3696
LINC00086	1.48931	0.10246	6.9961	8.45109e-12	4.84814e-10	16.3087
EZH1	0.478704	4.1107	6.99529	8.49571e-12	4.85738e-10	16.3036
CCDC78	1.33738	-0.368719	6.99197	8.68077e-12	4.94659e-10	16.2827
PBX1	1.33429	4.33375	6.99038	8.77103e-12	4.98136e-10	16.2727
IQCH-AS1	0.564202	1.49358	6.98771	8.92427e-12	5.04711e-10	16.2559
BCL2	1.07317	2.79597	6.98734	8.94605e-12	5.04711e-10	16.2535
ITGB6	-1.26268	6.51559	-6.98636	9.00303e-12	5.06249e-10	16.2474
AREG	-1.55134	5.02938	-6.96976	1.00261e-11	5.61925e-10	16.1431
NR3C2	1.46637	-0.235357	6.96812	1.01334e-11	5.66077e-10	16.1328
C19orf57	0.978528	1.74681	6.96122	1.05964e-11	5.89229e-10	16.0895
CTC-429P9.3	0.630956	1.29145	6.96092	1.06171e-11	5.89229e-10	16.0876
SLC9A2	1.99387	0.185879	6.96039	1.06535e-11	5.89333e-10	16.0843
ST6GAL1	1.11071	4.48001	6.95933	1.07271e-11	5.8968e-10	16.0776
LRRC16B	1.16768	0.44416	6.9593	1.0729e-11	5.8968e-10	16.0774
MYRF	1.24871	1.48192	6.95504	1.10292e-11	6.04085e-10	16.0507
SNX22	0.701447	0.986155	6.95458	1.1062e-11	6.04085e-10	16.0478
RIC3	1.53146	-1.2879	6.94666	1.16431e-11	6.32098e-10	15.9982
SGPP1	-0.734236	3.91861	-6.94658	1.16492e-11	6.32098e-10	15.9977
ABCC6	0.88646	0.0492155	6.93989	1.21638e-11	6.57927e-10	15.9558
CAP1	-0.415872	8.70924	-6.93886	1.22449e-11	6.60216e-10	15.9494
CROCC	0.758891	4.7415	6.93749	1.23536e-11	6.62438e-10	15.9408
CASP1	-0.695972	4.93806	-6.93736	1.23639e-11	6.62438e-10	15.94
F2RL1	-1.06617	5.18415	-6.93461	1.25855e-11	6.722e-10	15.9228
ZBTB18	0.831507	3.39518	6.93131	1.28569e-11	6.84547e-10	15.9022
OTUD7A	1.07746	0.520813	6.92606	1.32997e-11	7.05918e-10	15.8693
ACTB	-0.313503	12.493	-6.92297	1.35674e-11	7.1789e-10	15.85
MDFI	-0.763749	5.99676	-6.92212	1.36413e-11	7.18557e-10	15.8448
OPTN	-0.496096	6.84058	-6.92186	1.36643e-11	7.18557e-10	15.8431
TP53INP1	0.592866	4.77954	6.92081	1.37567e-11	7.21191e-10	15.8366
FDFT1	0.585029	6.80121	6.91471	1.43083e-11	7.47805e-10	15.7985
RSAD2	-1.35133	4.91874	-6.91379	1.43938e-11	7.49976e-10	15.7928
PRPSAP1	0.437066	5.23733	6.91318	1.44507e-11	7.50642e-10	15.7889
ENPP5	1.92862	-0.448772	6.91266	1.44985e-11	7.5084e-10	15.7857
DDX60	-1.06792	5.82366	-6.90641	1.50939e-11	7.79302e-10	15.7468
SYNGR3	1.3872	0.945818	6.9056	1.51724e-11	7.80991e-10	15.7417
SPOCD1	-1.10723	2.11373	-6.90357	1.5372e-11	7.85297e-10	15.7291
SIM2	1.44082	1.80913	6.90339	1.53901e-11	7.85297e-10	15.7279
GPT	1.16792	0.162105	6.90334	1.53944e-11	7.85297e-10	15.7277
CHMP7	0.378402	5.20422	6.89849	1.58823e-11	8.07767e-10	15.6974
LRMP	1.17154	1.3439	6.89437	1.63086e-11	8.26984e-10	15.6718
PANX1	-0.616185	5.23344	-6.89176	1.65842e-11	8.3846e-10	15.6556
RGS5	0.643779	1.87134	6.88621	1.71864e-11	8.66335e-10	15.621
PLEK2	-0.924558	5.78454	-6.88432	1.73958e-11	8.74307e-10	15.6093
CEP70	0.761816	3.74436	6.88179	1.76804e-11	8.83562e-10	15.5936
FAM98C	0.485269	3.40739	6.88176	1.76837e-11	8.83562e-10	15.5934
KLF7	-0.676992	5.63972	-6.88096	1.77747e-11	8.85512e-10	15.5884
PCBP1-AS1	0.548561	2.86723	6.87803	1.81127e-11	8.96507e-10	15.5702
IBA57	0.4426	3.62631	6.87773	1.81471e-11	8.96507e-10	15.5683
RP11-284N8.3	1.41084	-0.729491	6.87768	1.81532e-11	8.96507e-10	15.568
CYB561D2	0.53875	0.742154	6.87554	1.84038e-11	9.06257e-10	15.5547
S100A10	-0.580556	8.88587	-6.87162	1.88715e-11	9.26608e-10	15.5304
TLE2	1.08953	2.28012	6.86966	1.91111e-11	9.35674e-10	15.5182
ZFPM2-AS1	-1.75183	0.457735	-6.8684	1.92659e-11	9.40553e-10	15.5104
SUSD4	1.48714	3.81417	6.86441	1.97639e-11	9.62106e-10	15.4857
LTF	2.828	2.00796	6.85862	2.05104e-11	9.95601e-10	15.4498
ZFP14	0.873097	1.53694	6.85499	2.09924e-11	1.0161e-09	15.4273
ERO1LB	0.879111	2.5154	6.84998	2.16757e-11	1.0462e-09	15.3963
ATP6V0E2-AS1	1.11096	-1.55231	6.84626	2.2197e-11	1.06834e-09	15.3732
ALDH5A1	1.08027	3.34871	6.84359	2.25793e-11	1.08368e-09	15.3567
PDLIM7	-0.618543	6.29417	-6.84249	2.27385e-11	1.08826e-09	15.3499
TM4SF19	-1.32943	1.82194	-6.83299	2.4159e-11	1.153e-09	15.2912
IQCB1	0.704266	4.12624	6.82532	2.53705e-11	1.20744e-09	15.2438
ASIC3	1.031	-1.14924	6.82363	2.56462e-11	1.21716e-09	15.2334
LONRF1	0.749765	3.47289	6.82302	2.57458e-11	1.21849e-09	15.2296
ZNF711	1.40171	1.33399	6.8154	2.70258e-11	1.27553e-09	15.1826
LTK	1.26152	-0.753047	6.81156	2.76938e-11	1.30344e-09	15.159
SH3BP5-AS1	0.836982	0.86585	6.81017	2.79403e-11	1.31142e-09	15.1504
IFIT2	-1.17346	4.20086	-6.80379	2.90984e-11	1.36203e-09	15.1111
KIAA1244	1.49767	1.43574	6.80187	2.94546e-11	1.37492e-09	15.0993
PARM1	1.24794	3.27832	6.79857	3.00791e-11	1.40024e-09	15.079
SEMA4A	0.519795	5.38909	6.79474	3.08211e-11	1.43087e-09	15.0554
UBE2L6	-0.735283	6.98504	-6.79229	3.13029e-11	1.44929e-09	15.0404
FA2H	1.47855	0.914489	6.78952	3.18593e-11	1.47105e-09	15.0234
SIRPA	-0.731533	6.3672	-6.78812	3.21424e-11	1.48011e-09	15.0148
KCNH2	1.36502	-0.915665	6.78716	3.23404e-11	1.48522e-09	15.0089
PLAC8	1.66963	1.91659	6.78496	3.27944e-11	1.50202e-09	14.9954
PPOX	0.508021	2.99992	6.77894	3.40705e-11	1.55628e-09	14.9584
RP11-480I12.5	1.4188	-0.249368	6.77803	3.42686e-11	1.56115e-09	14.9528
CTC-524C5.2	1.01417	-0.0520293	6.77591	3.47312e-11	1.578e-09	14.9398
P2RX1	1.01367	-0.222582	6.77351	3.52646e-11	1.59797e-09	14.9251
CCAR2	0.415407	6.19457	6.76682	3.67895e-11	1.66265e-09	14.8841
FRAT2	0.659603	3.84154	6.75957	3.85173e-11	1.73613e-09	14.8397
RPSAP52	-1.5079	-0.613246	-6.75749	3.90266e-11	1.75445e-09	14.8269
BTNL9	1.72409	0.359348	6.75181	4.04552e-11	1.81388e-09	14.7921
RHOD	-0.972959	6.20887	-6.75017	4.0875e-11	1.82789e-09	14.7822
NEIL1	0.936463	1.40323	6.74798	4.14448e-11	1.84852e-09	14.7688
TMPRSS2	2.25516	1.3021	6.74626	4.18983e-11	1.86387e-09	14.7582
TMEM56	1.41418	0.60728	6.74534	4.21423e-11	1.86984e-09	14.7526
PLA2G6	0.677055	2.96716	6.74268	4.28562e-11	1.89658e-09	14.7363
RBP7	1.30577	0.757326	6.73732	4.43292e-11	1.95669e-09	14.7036
LMO4	0.764331	5.67556	6.73677	4.44831e-11	1.95841e-09	14.7003
AGTRAP	-0.565882	6.16514	-6.73481	4.50388e-11	1.97776e-09	14.6883
PAXIP1-AS1	0.750613	1.94006	6.7338	4.53252e-11	1.98522e-09	14.6821
FAM3D	2.03849	1.2373	6.73167	4.59395e-11	2.00194e-09	14.6691
DENND1C	0.625449	3.65418	6.73166	4.5942e-11	2.00194e-09	14.6691
ZNF546	0.758398	0.264711	6.73058	4.62554e-11	2.01046e-09	14.6625
AMY2B	1.21646	-0.430132	6.72999	4.64283e-11	2.01284e-09	14.6589
SAMD12	1.71923	2.7263	6.72785	4.70576e-11	2.03494e-09	14.6458
SCAI	0.561178	2.72357	6.72524	4.78392e-11	2.06351e-09	14.6299
C10orf55	-0.82767	0.987851	-6.72265	4.86243e-11	2.09207e-09	14.6141
TRPV4	0.999006	4.01943	6.7179	5.01026e-11	2.15025e-09	14.5852
OSER1-AS1	0.815233	1.28456	6.71555	5.08481e-11	2.17676e-09	14.5709
ZNF540	0.984935	-1.38751	6.71376	5.14233e-11	2.19587e-09	14.56
SFI1	0.572006	3.80043	6.70838	5.31937e-11	2.26151e-09	14.5272
APTR	0.677248	2.22425	6.70828	5.3226e-11	2.26151e-09	14.5266
RP11-747H7.3	1.1528	-0.568725	6.70596	5.40086e-11	2.28905e-09	14.5125
ITGA9-AS1	0.709849	-0.0862981	6.70043	5.59187e-11	2.36413e-09	14.4789
CBFA2T2	0.591882	4.87017	6.6978	5.68502e-11	2.39621e-09	14.4629
YPEL1	1.04642	-0.590911	6.69749	5.69589e-11	2.39621e-09	14.4611
DUSP6	-0.790206	6.11286	-6.69599	5.74995e-11	2.413e-09	14.4519
HYKK	0.687288	0.836824	6.69468	5.79757e-11	2.427e-09	14.4439
SNAI2	-0.633219	6.07089	-6.69257	5.87469e-11	2.45326e-09	14.4312
LINC01534	0.972988	-1.89303	6.68872	6.01844e-11	2.50255e-09	14.4078
ISG15	-1.24813	7.1725	-6.68862	6.02209e-11	2.50255e-09	14.4072
ADARB2	1.78671	-1.16035	6.68755	6.0625e-11	2.51321e-09	14.4007
TMEM150C	1.0969	1.91112	6.68181	6.28498e-11	2.59911e-09	14.3658
FICD	0.507638	2.08709	6.67944	6.37908e-11	2.6299e-09	14.3515
TCEA3	1.09185	4.02869	6.67915	6.39029e-11	2.6299e-09	14.3498
SAMD9	-1.04274	6.99252	-6.67834	6.42282e-11	2.63692e-09	14.3449
CTB-36H16.2	0.853079	-1.30229	6.6769	6.48139e-11	2.65314e-09	14.3361
ADAMTS15	-1.43047	3.05006	-6.67649	6.4978e-11	2.65314e-09	14.3336
PRSS36	0.774722	1.02513	6.67622	6.50905e-11	2.65314e-09	14.3319
IFI6	-1.24427	7.86632	-6.67556	6.53566e-11	2.65763e-09	14.328
SRRM5	0.81099	-1.14438	6.6712	6.7169e-11	2.72482e-09	14.3015
PCDH7	-1.31431	5.24024	-6.6675	6.87405e-11	2.78195e-09	14.2792
MMP13	-2.26299	4.66973	-6.6663	6.92593e-11	2.7963e-09	14.2719
KRT14	-1.70337	12.6961	-6.6655	6.96063e-11	2.80367e-09	14.2671
ECHDC2	0.826703	4.06358	6.66158	7.13321e-11	2.86641e-09	14.2434
CD44	-0.555994	9.829	-6.6609	7.16367e-11	2.86722e-09	14.2392
EHD2	-0.600722	7.62249	-6.66079	7.1689e-11	2.86722e-09	14.2385
SP100	-0.4935	6.13672	-6.65934	7.23394e-11	2.88182e-09	14.2298
RP11-358L22.3	0.861607	-1.05782	6.65922	7.23923e-11	2.88182e-09	14.2291
LINC01089	0.900844	1.31447	6.65884	7.25671e-11	2.88205e-09	14.2268
C6orf223	1.68604	-0.015984	6.65713	7.33454e-11	2.90618e-09	14.2164
SH2D4A	0.689796	4.03309	6.64755	7.78698e-11	3.0783e-09	14.1585
LIPE	0.930297	2.13905	6.64068	8.12768e-11	3.20554e-09	14.1171
SLC16A1	-0.633021	7.16524	-6.63716	8.3081e-11	3.26913e-09	14.0959
FAM172A	0.600388	3.68412	6.63318	8.51672e-11	3.3435e-09	14.0719
RP11-161M6.2	1.08816	-0.653036	6.631	8.63351e-11	3.38082e-09	14.0587
RP1-193H18.2	1.01511	-0.359995	6.63066	8.65147e-11	3.38082e-09	14.0567
LINC01315	1.30957	-0.730525	6.62906	8.73817e-11	3.40689e-09	14.0471
EVA1C	0.890018	3.61348	6.62821	8.78483e-11	3.41726e-09	14.0419
GLB1L2	1.75981	1.16394	6.62615	8.89808e-11	3.45343e-09	14.0295
SLAIN1	1.26202	-0.293247	6.62105	9.18518e-11	3.55675e-09	13.9988
TMC5	1.63517	0.624911	6.61966	9.26468e-11	3.5794e-09	13.9905
SRPX	-1.23208	3.0373	-6.6188	9.31437e-11	3.59046e-09	13.9853
NOS2	1.77573	-0.0467978	6.61594	9.48177e-11	3.64674e-09	13.9681
TMEM205	0.549686	5.03957	6.61498	9.53844e-11	3.66027e-09	13.9623
FSTL3	-1.04188	5.16075	-6.61439	9.57361e-11	3.66551e-09	13.9588
EFCAB6	1.04989	-1.09637	6.60969	9.8576e-11	3.76578e-09	13.9305
FHL2	-0.679214	6.2412	-6.60867	9.91994e-11	3.78112e-09	13.9244
IL34	1.14145	1.75049	6.60746	9.9949e-11	3.80118e-09	13.9171
RP5-821D11.7	0.590463	1.813	6.60572	1.01035e-10	3.83393e-09	13.9067
CA2	-1.33616	5.65403	-6.60499	1.01496e-10	3.83723e-09	13.9023
HOOK2	0.520038	5.02544	6.60486	1.01572e-10	3.83723e-09	13.9015
RP11-731C17.2	0.793053	-0.19499	6.6018	1.03523e-10	3.90227e-09	13.8831
PRRT3	0.643265	0.961708	6.59634	1.07092e-10	4.02788e-09	13.8504
CACNA2D2	0.907665	-0.373547	6.59408	1.08602e-10	4.07568e-09	13.8368
RP5-884M6.1	-1.65985	0.231778	-6.59018	1.11261e-10	4.16629e-09	13.8134
XXbac-BPGBPG55C20.2	0.909867	-1.56972	6.58934	1.11843e-10	4.17891e-09	13.8084
PRKAG2-AS1	1.22331	-1.55723	6.58534	1.1465e-10	4.26783e-09	13.7844
MSRB1	-0.563878	5.67523	-6.58524	1.14724e-10	4.26783e-09	13.7838
MIR4697HG	1.47502	-0.521728	6.58292	1.16383e-10	4.32012e-09	13.7699
CDON	0.929534	1.70994	6.57777	1.2015e-10	4.45026e-09	13.7391
RP11-554I8.2	-1.66738	0.127314	-6.57397	1.23013e-10	4.54643e-09	13.7163
LAMC2	-1.16412	9.73184	-6.56718	1.28287e-10	4.73107e-09	13.6758
MYO15B	0.973321	2.6645	6.56432	1.30577e-10	4.80513e-09	13.6586
AMN	1.21319	1.69194	6.56341	1.31306e-10	4.80653e-09	13.6533
EPB41L4A-AS2	0.928463	-1.2522	6.56338	1.31337e-10	4.80653e-09	13.653
UPK1B	3.0085	0.838755	6.56322	1.31462e-10	4.80653e-09	13.6521
ATP1B2	1.03355	-0.743634	6.56254	1.32014e-10	4.81638e-09	13.6481
SLC25A42	0.67123	2.82242	6.56003	1.3408e-10	4.8813e-09	13.6331
KCNIP2	0.877874	-0.913654	6.554	1.39166e-10	5.05568e-09	13.5971
PRCD	0.947314	-1.51535	6.5497	1.42904e-10	5.17543e-09	13.5714
PPFIBP2	0.74498	4.64211	6.54952	1.4307e-10	5.17543e-09	13.5703
RP11-134G8.5	0.826096	-0.029774	6.54803	1.44387e-10	5.21199e-09	13.5615
NRF1	0.261607	4.08506	6.5454	1.46752e-10	5.28617e-09	13.5458
WNT7A	-1.73696	2.36467	-6.54434	1.4771e-10	5.30945e-09	13.5395
IQCD	0.702551	-0.189153	6.5406	1.51152e-10	5.42174e-09	13.5172
PASK	0.622393	3.17836	6.53779	1.53795e-10	5.50496e-09	13.5004
BEX2	1.68582	1.39066	6.53607	1.55436e-10	5.55204e-09	13.4902
SUZ12P1	0.646686	1.89776	6.53515	1.56314e-10	5.57171e-09	13.4847
PCBD2	0.467328	2.54281	6.53415	1.5728e-10	5.59445e-09	13.4788
EYA2	1.7368	2.57793	6.53233	1.59056e-10	5.64583e-09	13.4679
MSX2	-1.13263	1.59661	-6.52624	1.65127e-10	5.84915e-09	13.4317
GRID2IP	1.05804	-1.68237	6.52472	1.66674e-10	5.89168e-09	13.4227
ARNT2	1.30274	2.31398	6.5232	1.68242e-10	5.9233e-09	13.4137
DLG3	0.591228	4.98797	6.52318	1.68264e-10	5.9233e-09	13.4135
FOXA1	1.90641	1.80864	6.52229	1.69184e-10	5.92645e-09	13.4083
RND2	1.35195	-0.0238102	6.52214	1.69343e-10	5.92645e-09	13.4074
RIN1	-0.69639	5.44324	-6.52209	1.69397e-10	5.92645e-09	13.407
RP11-417E7.1	-1.25718	1.16841	-6.52163	1.69876e-10	5.93103e-09	13.4043
KLF10	-0.59112	6.77171	-6.52121	1.70313e-10	5.93413e-09	13.4018
RP11-51F16.1	1.02417	0.564978	6.52015	1.71427e-10	5.96075e-09	13.3955
SEC14L2	-0.863995	4.43639	-6.5193	1.72325e-10	5.9798e-09	13.3905
PXYLP1	1.01228	3.12038	6.51343	1.78651e-10	6.18256e-09	13.3556
2019-03-03	0.787381	1.5301	6.51296	1.79171e-10	6.18256e-09	13.3528
SERINC2	-0.769966	7.76349	-6.51288	1.79257e-10	6.18256e-09	13.3524
P4HA2	-0.62524	6.46393	-6.51026	1.82163e-10	6.27008e-09	13.3368
TSPAN12	1.01447	1.03554	6.50868	1.83941e-10	6.31851e-09	13.3274
NSUN7	1.42762	-0.137717	6.50613	1.86833e-10	6.40497e-09	13.3123
SEL1L3	0.811705	5.3618	6.50491	1.88246e-10	6.44042e-09	13.3051
VDR	-0.582113	5.72324	-6.50433	1.88918e-10	6.45048e-09	13.3016
FHOD1	-0.448304	4.97485	-6.50336	1.90046e-10	6.476e-09	13.2959
TRIM21	-0.588345	4.82081	-6.49907	1.95102e-10	6.63504e-09	13.2705
GPR68	-0.904968	4.81832	-6.49817	1.96189e-10	6.6587e-09	13.2651
SLC25A25-AS1	0.920484	1.56894	6.49409	2.01147e-10	6.81339e-09	13.241
CACNB4	1.36006	-1.21969	6.48826	2.08459e-10	7.04706e-09	13.2065
JADE1	0.603591	3.66508	6.48322	2.14996e-10	7.25367e-09	13.1767
QRICH2	0.93537	0.987984	6.48277	2.15593e-10	7.25943e-09	13.174
PLEKHG4	1.13611	3.86128	6.47956	2.19864e-10	7.3779e-09	13.155
BANK1	1.05657	0.483441	6.47925	2.20276e-10	7.3779e-09	13.1532
PODNL1	-0.820187	3.14547	-6.47915	2.2041e-10	7.3779e-09	13.1526
UNC119B	0.561382	4.86349	6.4771	2.23191e-10	7.45632e-09	13.1405
SLC44A4	1.72395	0.708837	6.47536	2.25586e-10	7.52159e-09	13.1302
COL4A4	1.42391	0.510907	6.4747	2.26492e-10	7.5245e-09	13.1263
PNMAL2	1.10155	-0.119444	6.47465	2.26556e-10	7.5245e-09	13.1261
SLC25A45	0.582642	1.94911	6.47392	2.27579e-10	7.54377e-09	13.1217
CCT6B	0.689196	0.16036	6.47261	2.29405e-10	7.58951e-09	13.114
CCRN4L	-0.679636	3.62278	-6.47093	2.31767e-10	7.65282e-09	13.1041
TEN1-CDK3	0.89061	-0.601798	6.46895	2.34592e-10	7.7311e-09	13.0924
HMSD	1.41971	-1.06818	6.46463	2.40853e-10	7.92211e-09	13.0669
KRT19	2.82551	6.66912	6.46304	2.43216e-10	7.98443e-09	13.0575
AP000347.2	0.84295	-1.41367	6.46208	2.44642e-10	8.01579e-09	13.0518
ZSCAN16	0.857827	0.578254	6.46023	2.47417e-10	8.09116e-09	13.0409
chr22-38_28785274-29006793.1	0.779397	3.76431	6.45888	2.49462e-10	8.1424e-09	13.033
MAST1	1.16069	-0.122017	6.45653	2.53059e-10	8.244e-09	13.0192
ADCY5	1.33145	0.542525	6.45259	2.59211e-10	8.414e-09	12.996
HUNK	1.17278	1.12374	6.45256	2.59265e-10	8.414e-09	12.9958
ZNF114	-1.25613	1.40781	-6.45135	2.61177e-10	8.45996e-09	12.9887
RP1-93H18.1	-0.827179	-0.72904	-6.44684	2.6846e-10	8.67935e-09	12.9621
SYCE2	1.15117	-1.30456	6.43897	2.81628e-10	9.08784e-09	12.9158
UNKL	0.567911	3.25917	6.43589	2.8695e-10	9.24208e-09	12.8977
PTGDS	1.24993	2.86098	6.43471	2.89031e-10	9.27771e-09	12.8908
RP11-295P9.3	0.594283	2.06259	6.43442	2.89533e-10	9.27771e-09	12.8891
CARD6	-0.817154	4.21287	-6.43433	2.8969e-10	9.27771e-09	12.8886
MFAP2	-0.832024	5.5102	-6.43335	2.91427e-10	9.31581e-09	12.8828
CHST11	-0.755206	5.337	-6.43301	2.92036e-10	9.3178e-09	12.8808
NSUN5P1	0.68136	2.55025	6.43089	2.95817e-10	9.42079e-09	12.8683
WEE2-AS1	0.879924	-1.04523	6.42759	3.01812e-10	9.59381e-09	12.849
CTB-31O20.2	0.848641	0.107121	6.42718	3.02555e-10	9.59951e-09	12.8466
KIFC3	-0.596814	5.8361	-6.42463	3.07281e-10	9.73133e-09	12.8316
FADS2	1.12359	5.33516	6.42008	3.15886e-10	9.98528e-09	12.8049
C7orf55-LUC7L2	0.3503	4.90325	6.41762	3.20651e-10	1.01171e-08	12.7905
UBXN11	0.706018	3.39449	6.41233	3.31105e-10	1.04277e-08	12.7595
PRDX2	0.696254	6.90376	6.41156	3.32654e-10	1.04571e-08	12.755
CTD-2516F10.2	1.1027	-1.00085	6.40906	3.37724e-10	1.05969e-08	12.7404
CD27	1.08094	1.71247	6.40863	3.38606e-10	1.06051e-08	12.7378
ZNF620	0.928222	-0.469906	6.40529	3.45544e-10	1.08025e-08	12.7183
VWCE	0.973466	-0.723546	6.40265	3.51111e-10	1.09565e-08	12.7028
TFDP2	0.684435	5.11944	6.40147	3.5362e-10	1.10146e-08	12.6959
RORB	1.64191	-1.00896	6.39885	3.59277e-10	1.11704e-08	12.6806
UBTD1	-0.488748	4.12852	-6.3973	3.62662e-10	1.12551e-08	12.6716
RP11-33B1.1	0.552635	1.82759	6.39375	3.70544e-10	1.14788e-08	12.6508
SYNE4	1.61958	-0.983186	6.38993	3.79208e-10	1.17258e-08	12.6285
IFNWP19	-1.70304	-0.354027	-6.38864	3.82173e-10	1.17961e-08	12.6209
ANKRD53	0.846461	-1.65609	6.38723	3.85454e-10	1.18477e-08	12.6127
NRXN3	1.56131	-0.748961	6.38708	3.85793e-10	1.18477e-08	12.6118
PROCA1	0.732671	-0.0104001	6.38702	3.8593e-10	1.18477e-08	12.6115
SERPINH1	-0.661659	8.11097	-6.38537	3.89794e-10	1.19448e-08	12.6019
MYOM3	-1.52628	2.93116	-6.38	4.02666e-10	1.22966e-08	12.5705
DHRS7	-0.483156	5.76917	-6.37998	4.02716e-10	1.22966e-08	12.5704
SMDT1	0.452751	4.48283	6.37735	4.09141e-10	1.2452e-08	12.5551
GLTSCR2	0.475203	7.48288	6.3773	4.0927e-10	1.2452e-08	12.5548
CACNA1D	1.23367	-1.29646	6.37666	4.10849e-10	1.24778e-08	12.5511
MUC4	2.30129	2.81574	6.37492	4.15197e-10	1.25874e-08	12.5409
GLCCI1	0.710796	2.54138	6.37064	4.26064e-10	1.28939e-08	12.516
PLAUR	-0.62132	5.82494	-6.36712	4.35198e-10	1.3147e-08	12.4955
ACACB	0.916828	2.43063	6.36495	4.40929e-10	1.32965e-08	12.4828
IRF4	1.07599	1.92722	6.36403	4.43375e-10	1.33467e-08	12.4775
RP11-254F7.2	0.796076	0.665385	6.36333	4.45265e-10	1.33799e-08	12.4734
RAB39B	1.10906	-1.34661	6.36245	4.47624e-10	1.34245e-08	12.4683
KLHL23	1.10642	2.07699	6.36219	4.48324e-10	1.34245e-08	12.4668
JSRP1	1.34181	0.781714	6.35793	4.59992e-10	1.37497e-08	12.442
MRPL34	0.4545	4.70274	6.35528	4.67394e-10	1.39465e-08	12.4266
SFXN3	-0.542692	5.24904	-6.35472	4.68964e-10	1.39689e-08	12.4233
FAM195A	0.699607	3.7422	6.34991	4.8274e-10	1.43541e-08	12.3954
ARHGAP26	0.795408	3.9512	6.34621	4.93607e-10	1.46517e-08	12.3739
VSIG2	1.47965	-0.81226	6.34576	4.9494e-10	1.46657e-08	12.3713
ZNF48	0.595981	3.03833	6.34394	5.00379e-10	1.48012e-08	12.3607
ZNF37BP	0.721755	2.26695	6.3426	5.04425e-10	1.48949e-08	12.3529
C3orf58	0.855329	4.74654	6.34067	5.1032e-10	1.50429e-08	12.3417
R3HCC1	0.426573	4.50424	6.33977	5.13074e-10	1.50856e-08	12.3365
EPHX2	0.884089	3.36039	6.33962	5.13537e-10	1.50856e-08	12.3357
GPR153	-0.732684	5.59712	-6.33667	5.22727e-10	1.53291e-08	12.3185
PLEKHB1	1.08128	0.380425	6.33597	5.24943e-10	1.53677e-08	12.3145
LEAP2	0.919945	-1.60858	6.33119	5.40223e-10	1.57879e-08	12.2868
CTD-2547G23.4	0.923512	-0.656618	6.32801	5.50617e-10	1.60641e-08	12.2684
2019-03-02	0.95648	1.48695	6.32334	5.66252e-10	1.6492e-08	12.2413
CYB5RL	0.661879	0.733324	6.32006	5.77508e-10	1.67911e-08	12.2223
NRIP2	0.711948	0.252606	6.31753	5.86336e-10	1.70187e-08	12.2077
PPIL6	0.813028	-0.521165	6.31561	5.93137e-10	1.71868e-08	12.1966
LINC00957	0.7932	0.305539	6.31527	5.94334e-10	1.71923e-08	12.1946
ZBTB7C	1.42055	4.13861	6.31425	5.97977e-10	1.72684e-08	12.1887
MIR31HG	-1.66959	-0.00608512	-6.31335	6.01208e-10	1.72862e-08	12.1835
RP11-1348G14.8	0.673638	-1.79629	6.31306	6.02262e-10	1.72862e-08	12.1818
NDUFA6-AS1	0.5971	-0.132239	6.31302	6.02375e-10	1.72862e-08	12.1816
CENPV	0.990825	1.61864	6.31295	6.02654e-10	1.72862e-08	12.1812
GGT7	0.968545	3.09884	6.30771	6.21858e-10	1.78071e-08	12.1509
RP11-352M15.2	0.563729	2.75278	6.30715	6.23944e-10	1.78278e-08	12.1477
SPIRE2	1.0122	2.02319	6.30695	6.24676e-10	1.78278e-08	12.1465
C16orf93	0.677178	-0.721957	6.30547	6.30247e-10	1.79568e-08	12.138
AC004381.6	0.629977	1.7822	6.30091	6.4767e-10	1.84224e-08	12.1117
GPR55	0.968759	-0.933983	6.29825	6.58034e-10	1.8686e-08	12.0963
EPHX3	2.03783	2.30922	6.29793	6.59315e-10	1.86912e-08	12.0945
CACNA2D3	1.04569	1.38204	6.29552	6.68856e-10	1.8913e-08	12.0806
FUK	0.367392	3.69563	6.2954	6.6936e-10	1.8913e-08	12.0799
RINL	0.769857	2.22863	6.2942	6.74163e-10	1.90172e-08	12.073
MAK	0.878661	-1.6452	6.2888	6.96249e-10	1.96078e-08	12.0419
TMEM246	1.21872	3.93781	6.28702	7.03709e-10	1.97851e-08	12.0316
SLC25A21	1.02015	-1.34768	6.28541	7.10488e-10	1.99428e-08	12.0223
ZNF789	0.597423	2.16209	6.28126	7.28299e-10	2.04092e-08	11.9984
DHRS13	0.674847	2.12648	6.27793	7.42909e-10	2.07844e-08	11.9793
HMBOX1	0.452783	3.06185	6.27599	7.51538e-10	2.09913e-08	11.9681
FAM182B	1.2107	-1.3529	6.27141	7.72348e-10	2.15373e-08	11.9417
CTD-2547L24.4	-0.992758	-0.331952	-6.26415	8.06468e-10	2.2452e-08	11.9
ENDOD1	-0.582894	6.16605	-6.26259	8.13971e-10	2.26235e-08	11.8911
PIGR	2.58058	0.743536	6.26219	8.1591e-10	2.26235e-08	11.8888
ACP6	0.767916	2.23978	6.26205	8.16612e-10	2.26235e-08	11.888
C3orf70	1.15989	1.10857	6.25827	8.35151e-10	2.30995e-08	11.8663
RPAIN	0.507909	3.97499	6.25792	8.36925e-10	2.31067e-08	11.8643
FAM117A	0.654109	3.21031	6.25768	8.38124e-10	2.31067e-08	11.8629
CDH26	1.19639	1.28281	6.25544	8.49326e-10	2.33546e-08	11.8501
FAM107A	1.07986	0.809072	6.25534	8.49855e-10	2.33546e-08	11.8495
SLC6A16	1.00924	-1.00912	6.25002	8.77125e-10	2.40651e-08	11.819
WFIKKN1	1.08619	-1.31752	6.24708	8.92603e-10	2.44504e-08	11.8021
E2F5	0.750658	1.82568	6.24478	9.04873e-10	2.47468e-08	11.7889
MORN3	1.16663	0.0375574	6.24428	9.07547e-10	2.47801e-08	11.7861
CD151	-0.494829	7.84012	-6.24332	9.12725e-10	2.48816e-08	11.7806
PTPRN2	0.890879	1.29255	6.24041	9.28643e-10	2.52751e-08	11.7639
DCST2	1.00825	-0.437989	6.23866	9.38306e-10	2.54415e-08	11.7539
CTD-2336O2.1	0.490367	2.09541	6.23855	9.38913e-10	2.54415e-08	11.7533
TJP3	1.47971	1.65709	6.2385	9.39236e-10	2.54415e-08	11.753
CAMK2A	-1.39905	0.0505217	-6.23088	9.82631e-10	2.65747e-08	11.7094
VAMP3	-0.293544	6.82282	-6.22963	9.89901e-10	2.67289e-08	11.7023
ATG4D	0.438137	4.65133	6.221	1.04182e-09	2.80864e-08	11.653
HDDC3	0.468203	2.59008	6.22062	1.04418e-09	2.81056e-08	11.6508
TNFSF10	-0.776531	7.73085	-6.21843	1.05777e-09	2.84125e-08	11.6383
XDH	-1.06254	4.13883	-6.21825	1.05892e-09	2.84125e-08	11.6373
TMCC3	-0.698452	4.77798	-6.21742	1.06414e-09	2.85076e-08	11.6325
AMIGO1	0.998557	1.45921	6.21621	1.07179e-09	2.86673e-08	11.6256
SP110	-0.355993	-1.22821	-6.21579	1.07439e-09	2.86919e-08	11.6233
CLIC6	1.38179	1.54619	6.21499	1.07954e-09	2.87601e-08	11.6187
MAP1LC3A	0.870497	2.96354	6.21486	1.08032e-09	2.87601e-08	11.618
APCDD1L	-1.3809	1.53737	-6.21447	1.08282e-09	2.87818e-08	11.6158
TMEM71	0.963443	0.078457	6.21262	1.09472e-09	2.90527e-08	11.6052
LMF1	0.652045	2.90559	6.21132	1.10316e-09	2.92312e-08	11.5978
RNF212	1.83728	-0.0304853	6.21059	1.10797e-09	2.9313e-08	11.5936
CTB-55O6.8	0.9032	1.12973	6.20827	1.12326e-09	2.96715e-08	11.5804
ZG16B	1.75391	0.539691	6.20799	1.12511e-09	2.96743e-08	11.5788
LRRC46	0.772425	-0.815582	6.20681	1.13298e-09	2.98357e-08	11.5721
TSPYL2	0.625984	3.56208	6.206	1.13843e-09	2.9933e-08	11.5674
CCDC74B	1.2053	-0.950252	6.2041	1.15128e-09	3.02243e-08	11.5566
TSC2	0.387606	6.14289	6.203	1.15874e-09	3.03733e-08	11.5504
RP11-452L6.1	0.655237	-0.728994	6.19622	1.20608e-09	3.15656e-08	11.5118
LRRC75A	0.776063	-0.374973	6.19519	1.21341e-09	3.17008e-08	11.5059
SIGIRR	0.639854	3.76345	6.19497	1.21497e-09	3.17008e-08	11.5047
PXN-AS1	0.52552	1.11758	6.19455	1.21803e-09	3.17321e-08	11.5023
ARHGAP4	0.961083	4.27757	6.19399	1.22206e-09	3.17886e-08	11.4991
PVR	-0.429385	5.60277	-6.19078	1.24537e-09	3.23453e-08	11.4809
PYGL	-0.827798	7.29547	-6.18827	1.26395e-09	3.27781e-08	11.4666
ZNF396	0.821206	-0.315983	6.18465	1.29122e-09	3.34202e-08	11.446
CCL19	1.57749	1.86272	6.18446	1.29263e-09	3.34202e-08	11.4449
RP11-552M11.8	0.82791	-1.7036	6.18409	1.29543e-09	3.34416e-08	11.4428
TMEM168	0.509099	4.50123	6.18048	1.32329e-09	3.41092e-08	11.4223
CNKSR3	0.607521	4.28843	6.17939	1.33182e-09	3.42771e-08	11.4161
SAMD10	0.65848	2.37694	6.17873	1.33698e-09	3.43583e-08	11.4124
FAM83E	1.32572	2.29584	6.17756	1.34621e-09	3.45433e-08	11.4058
GAS5-AS1	0.605052	-1.52233	6.17702	1.35051e-09	3.46015e-08	11.4027
NAPA-AS1	0.59483	-0.131865	6.1761	1.35784e-09	3.4737e-08	11.3975
TAP1	-0.686699	7.98527	-6.17248	1.38706e-09	3.54313e-08	11.3769
CFL1	-0.316767	10.0716	-6.17035	1.4045e-09	3.58231e-08	11.3649
SOX8	1.19315	-1.0978	6.16991	1.40814e-09	3.58624e-08	11.3624
TSHZ3	-0.832975	3.57043	-6.16665	1.43539e-09	3.64493e-08	11.3439
ADM2	0.99979	2.20285	6.16664	1.43547e-09	3.64493e-08	11.3439
TSSK6	0.676117	0.0178955	6.16603	1.44066e-09	3.65267e-08	11.3404
RP11-1020A11.2	0.417274	0.21504	6.16447	1.45388e-09	3.68072e-08	11.3316
CTTNBP2	1.5056	0.0556204	6.16347	1.46244e-09	3.6939e-08	11.3259
BCAR3	-0.758154	4.53359	-6.16312	1.46545e-09	3.6939e-08	11.3239
LINC01133	1.58069	2.09192	6.16311	1.46559e-09	3.6939e-08	11.3238
OXER1	1.13377	-0.89683	6.16128	1.48141e-09	3.72824e-08	11.3135
EZH2	0.594707	4.56692	6.15241	1.56058e-09	3.92171e-08	11.2633
LINC00969	0.786873	3.37222	6.15041	1.579e-09	3.96216e-08	11.252
GPR137C	0.874511	-0.457187	6.1498	1.58464e-09	3.97046e-08	11.2485
NARF	0.380855	5.36647	6.14944	1.58796e-09	3.97292e-08	11.2465
RP11-74E22.3	0.815155	-1.52284	6.14797	1.60167e-09	3.9942e-08	11.2382
ECSIT	0.433398	5.16359	6.1479	1.60235e-09	3.9942e-08	11.2378
RNF32	0.669888	0.456692	6.14778	1.60349e-09	3.9942e-08	11.2371
RP11-539I5.1	0.998182	0.431106	6.14707	1.61018e-09	4.00461e-08	11.2331
CERK	0.504306	5.42473	6.14684	1.61237e-09	4.00461e-08	11.2318
WFDC21P	1.35375	3.55366	6.1454	1.62603e-09	4.03265e-08	11.2237
FBXO24	0.72947	-1.62698	6.14423	1.63719e-09	4.05232e-08	11.2171
CTSC	-0.627038	8.14717	-6.14397	1.63974e-09	4.05232e-08	11.2156
CNNM3	0.522007	4.04821	6.14382	1.6411e-09	4.05232e-08	11.2148
KB-1732A1.1	-0.884203	1.19527	-6.13941	1.68403e-09	4.14901e-08	11.1899
NOSTRIN	0.501128	0.690783	6.1393	1.68512e-09	4.14901e-08	11.1893
FZD9	1.04309	-0.621197	6.13762	1.70179e-09	4.18054e-08	11.1798
MMP3	-1.75235	5.16522	-6.13752	1.70284e-09	4.18054e-08	11.1792
GKAP1	0.942445	0.1053	6.1371	1.70696e-09	4.18464e-08	11.1768
SLC38A7	-0.363319	4.91237	-6.13572	1.72087e-09	4.21267e-08	11.169
CUL9	0.536241	4.82469	6.13494	1.72876e-09	4.22591e-08	11.1646
EFHC2	1.33035	-1.06829	6.13401	1.73812e-09	4.24271e-08	11.1594
IFI44	-0.988846	5.40215	-6.13329	1.74547e-09	4.25456e-08	11.1553
FHIT	0.884088	-0.125816	6.1326	1.75255e-09	4.26569e-08	11.1514
NFYB	0.396727	4.41141	6.13207	1.75797e-09	4.27279e-08	11.1485
RP4-756H11.3	0.627449	-0.374815	6.13067	1.77238e-09	4.30169e-08	11.1406
AGBL3	0.587965	-0.445101	6.12902	1.78967e-09	4.33746e-08	11.1312
COLEC11	1.29804	-0.606862	6.12815	1.79875e-09	4.34096e-08	11.1264
RP11-752L20.3	-0.829151	0.0760459	-6.12812	1.79906e-09	4.34096e-08	11.1262
EIF4EBP3	0.853274	0.649781	6.12812	1.79909e-09	4.34096e-08	11.1262
FDCSP	2.82524	0.542808	6.12791	1.8013e-09	4.34096e-08	11.125
ZYG11A	1.64563	-0.508683	6.12536	1.82829e-09	4.39978e-08	11.1106
LDHA	-0.475844	10.061	-6.12377	1.8454e-09	4.43469e-08	11.1017
TOR3A	0.455097	5.4882	6.11844	1.90371e-09	4.56836e-08	11.0717
RP11-734K2.4	0.628966	-0.475955	6.11804	1.90815e-09	4.57258e-08	11.0694
TAP2	-0.519948	6.22434	-6.115	1.94238e-09	4.6462e-08	11.0523
ACSM3	0.8564	-0.296643	6.11483	1.94432e-09	4.6462e-08	11.0513
ZNF862	0.694876	2.35872	6.11261	1.96966e-09	4.70015e-08	11.0389
GATM	1.11625	3.01	6.11207	1.97577e-09	4.70814e-08	11.0359
RIBC1	0.7393	-0.608364	6.1099	2.00094e-09	4.76145e-08	11.0237
GCNT2	1.28204	1.64852	6.1096	2.00453e-09	4.76334e-08	11.0219
2019-03-01	1.13075	1.85373	6.10882	2.01366e-09	4.77837e-08	11.0176
SSPO	1.0159	-1.65412	6.10796	2.02374e-09	4.79561e-08	11.0127
CRHR1-IT1	0.506317	3.45209	6.10172	2.09871e-09	4.96637e-08	10.9777
FAM81A	0.938355	0.220014	6.10114	2.10587e-09	4.97639e-08	10.9744
EPB41L4A	0.994289	1.81957	6.09974	2.12301e-09	5.00995e-08	10.9666
TMEM92	-1.03904	1.64711	-6.09899	2.13231e-09	5.02495e-08	10.9624
ATP5A1	0.365999	8.47404	6.09767	2.14876e-09	5.05671e-08	10.955
OGFRL1	0.615955	5.40815	6.09688	2.15867e-09	5.07303e-08	10.9505
SCARA3	0.981856	4.14807	6.09622	2.16702e-09	5.08564e-08	10.9468
RP11-722E23.2	0.683342	-1.05768	6.09451	2.18868e-09	5.12939e-08	10.9372
CES3	1.22031	0.151175	6.09426	2.19185e-09	5.12977e-08	10.9358
CCDC101	0.457183	3.58913	6.09365	2.19971e-09	5.14109e-08	10.9324
CCDC74A	1.08021	0.795279	6.09334	2.20359e-09	5.14312e-08	10.9307
VAMP1	0.701174	1.83805	6.09274	2.2113e-09	5.15405e-08	10.9273
SLC16A8	1.22427	-1.07112	6.09236	2.21626e-09	5.15856e-08	10.9252
CFAP44	0.869077	1.72974	6.09206	2.22017e-09	5.16061e-08	10.9235
PKN3	0.615458	3.31424	6.08679	2.28925e-09	5.31394e-08	10.8939
RP11-297D21.4	0.63222	-1.13487	6.085	2.31315e-09	5.36209e-08	10.8839
OAS3	-0.825811	7.49017	-6.08388	2.32821e-09	5.38968e-08	10.8777
TMEM116	0.931205	2.32463	6.08216	2.35169e-09	5.43665e-08	10.868
RNFT2	1.21962	0.303599	6.07933	2.39057e-09	5.51905e-08	10.8522
RP11-285F7.2	0.702496	0.0632875	6.07795	2.40984e-09	5.55601e-08	10.8445
AC009005.2	1.11108	-1.33773	6.07489	2.45302e-09	5.64792e-08	10.8273
SLC31A2	-0.753324	1.9714	-6.07464	2.45664e-09	5.6486e-08	10.8259
ADI1	0.395997	6.08978	6.0741	2.46437e-09	5.65875e-08	10.8229
RP11-258C19.7	0.81591	0.692196	6.07231	2.49006e-09	5.71004e-08	10.8129
TTLL11	-0.584293	2.05241	-6.07139	2.50343e-09	5.73299e-08	10.8077
CAB39	-0.438237	6.93259	-6.0695	2.53101e-09	5.78837e-08	10.7972
RNF208	0.860585	1.87204	6.06926	2.53454e-09	5.78868e-08	10.7958
NUCB2	0.452127	5.23839	6.0657	2.58732e-09	5.90131e-08	10.776
CAV2	-0.595445	6.82364	-6.06242	2.63708e-09	6.00364e-08	10.7576
RPL32P3	0.70874	1.63366	6.06228	2.63923e-09	6.00364e-08	10.7568
NLGN3	0.896522	-1.16995	6.05947	2.68243e-09	6.09376e-08	10.7412
HERC6	-0.930197	5.26719	-6.05866	2.6951e-09	6.11439e-08	10.7367
MPC1	0.444012	3.87413	6.05631	2.73211e-09	6.19012e-08	10.7235
SELK	0.35498	4.70302	6.05522	2.74934e-09	6.22088e-08	10.7175
AC007191.4	0.871005	-0.877087	6.05412	2.7669e-09	6.25231e-08	10.7113
PML	-0.512678	7.35546	-6.05348	2.77715e-09	6.26717e-08	10.7078
CYP4F12	1.74172	0.198944	6.04993	2.83473e-09	6.38864e-08	10.688
CRACR2B	0.902797	1.62338	6.0495	2.84188e-09	6.39407e-08	10.6856
EIF2AK3	0.535571	4.23989	6.04933	2.84464e-09	6.39407e-08	10.6846
LL0XNC01-7P3.1	0.873502	-0.799406	6.04672	2.88785e-09	6.48262e-08	10.6701
ADAM11	0.854896	-0.961303	6.04546	2.90899e-09	6.52149e-08	10.6631
CLCA2	-1.11536	8.76005	-6.04022	2.99847e-09	6.71326e-08	10.6339
TRIM5	-0.543203	4.35837	-6.03775	3.04152e-09	6.80071e-08	10.6202
WASH2P	0.616348	0.578145	6.03731	3.04937e-09	6.80933e-08	10.6177
AC009120.6	0.764747	0.315425	6.03465	3.0965e-09	6.90551e-08	10.6029
C1S	-0.727345	8.22688	-6.0295	3.18983e-09	7.10435e-08	10.5743
IFIH1	-0.776938	5.61232	-6.02857	3.20702e-09	7.13331e-08	10.5691
NRTN	1.21424	-0.603392	6.02715	3.2335e-09	7.18284e-08	10.5612
SULF2	-0.853824	7.86332	-6.02663	3.24315e-09	7.1949e-08	10.5583
PLK3	-0.493958	4.51319	-6.02602	3.25463e-09	7.21098e-08	10.5549
IRF2BP1	0.412962	4.459	6.0227	3.31751e-09	7.34075e-08	10.5365
LARP1B	0.476354	3.84853	6.01954	3.37846e-09	7.46592e-08	10.519
KIAA1324	1.4219	1.99785	6.01694	3.42952e-09	7.56894e-08	10.5045
MUC20	1.56721	2.07901	6.0165	3.43805e-09	7.57794e-08	10.5021
ALDH3A1	1.78923	5.66686	6.01627	3.4426e-09	7.57817e-08	10.5008
MDH1B	0.849023	-1.68505	6.01474	3.47313e-09	7.63551e-08	10.4923
MSMB	1.99052	-0.633422	6.01201	3.5281e-09	7.74637e-08	10.4772
ZNF830	0.321694	3.72635	6.01066	3.55569e-09	7.79689e-08	10.4697
CYP27A1	1.10462	3.03138	6.00737	3.62352e-09	7.93542e-08	10.4515
GCDH	0.415163	4.23664	6.00444	3.68529e-09	8.06033e-08	10.4352
AFAP1L2	-0.724488	5.86231	-6.00008	3.77869e-09	8.25402e-08	10.4111
KIAA1875	1.19492	-0.67309	5.99735	3.83836e-09	8.37362e-08	10.396
CHPT1	0.87194	3.32262	5.99688	3.84889e-09	8.38585e-08	10.3934
JPH2	-1.39983	1.4582	-5.99516	3.88699e-09	8.45806e-08	10.3839
C1QTNF6	-0.76522	5.07643	-5.99451	3.90156e-09	8.47818e-08	10.3803
CLMP	-1.01384	4.06083	-5.9943	3.90619e-09	8.47818e-08	10.3792
TMEM198B	0.579323	2.86167	5.98944	4.01685e-09	8.70726e-08	10.3523
PNPLA7	0.729205	1.14919	5.98865	4.03506e-09	8.73562e-08	10.3479
PAN2	0.516198	4.30022	5.987	4.07329e-09	8.80721e-08	10.3388
CCDC150	0.777684	0.699626	5.98357	4.15431e-09	8.97099e-08	10.3199
DHRS11	0.539631	2.7284	5.98167	4.19975e-09	9.0468e-08	10.3094
RP11-884K10.7	0.491647	1.01539	5.98166	4.20003e-09	9.0468e-08	10.3093
SH2B1	0.408379	5.03096	5.98126	4.20959e-09	9.05593e-08	10.3071
AFF3	1.14333	-0.706559	5.98088	4.21876e-09	9.06422e-08	10.305
PRSS12	1.28307	3.3969	5.9765	4.32613e-09	9.28319e-08	10.2808
OLFM1	1.46083	3.44454	5.97396	4.38947e-09	9.40727e-08	10.2669
FBRSL1	0.388335	5.72278	5.97185	4.44268e-09	9.50934e-08	10.2552
GATS	0.777354	2.4066	5.96997	4.49083e-09	9.60035e-08	10.2449
RP11-694I15.7	0.84465	-1.12591	5.9685	4.52885e-09	9.66949e-08	10.2368
LY9	1.05797	0.279465	5.96447	4.63449e-09	9.88265e-08	10.2146
CRABP1	1.61426	-0.947481	5.9635	4.66005e-09	9.92475e-08	10.2093
GPR115	-1.00522	4.26874	-5.96102	4.72664e-09	1.0054e-07	10.1956
WWOX	0.500332	3.04713	5.9579	4.81162e-09	1.0222e-07	10.1784
FAM184A	1.10172	-0.890118	5.95497	4.89295e-09	1.03818e-07	10.1623
SEMA4D	0.61778	5.00034	5.95416	4.91571e-09	1.04171e-07	10.1578
GLIPR1	-0.709946	4.57007	-5.95364	4.93022e-09	1.04349e-07	10.155
GRN	-0.379276	9.40607	-5.95146	4.9919e-09	1.05523e-07	10.143
RAB37	0.788071	0.249226	5.94652	5.13477e-09	1.08409e-07	10.1159
INTS9	0.381443	4.07257	5.94526	5.17158e-09	1.09051e-07	10.109
CNGB1	-1.70493	2.41038	-5.94436	5.19843e-09	1.09482e-07	10.104
DNMT3A	0.541697	4.72768	5.94389	5.21218e-09	1.09593e-07	10.1015
SLC12A4	-0.422733	5.77317	-5.94375	5.21656e-09	1.09593e-07	10.1007
CTC-429P9.1	0.639459	-1.70032	5.94035	5.31846e-09	1.11596e-07	10.082
RP13-942N8.1	0.799367	-1.41532	5.93993	5.33128e-09	1.11727e-07	10.0797
RP11-465N4.4	0.906517	-0.57421	5.93959	5.3415e-09	1.11804e-07	10.0779
ZNF436-AS1	0.655279	0.315569	5.93822	5.38347e-09	1.12544e-07	10.0703
TTLL3	0.780917	1.8334	5.93774	5.39834e-09	1.12717e-07	10.0677
LINC00893	0.893996	-0.96942	5.93602	5.4515e-09	1.13688e-07	10.0582
AVPR2	0.945028	-1.67769	5.93497	5.48403e-09	1.14226e-07	10.0525
OASL	-1.10939	4.93931	-5.93454	5.49763e-09	1.14369e-07	10.0501
TENM2	-1.4091	6.46038	-5.93422	5.50766e-09	1.14439e-07	10.0484
ZNFX1	-0.508701	6.49663	-5.93361	5.52659e-09	1.14692e-07	10.0451
MPND	0.44459	3.82857	5.93309	5.54296e-09	1.14892e-07	10.0422
AP3M2	0.567415	3.89416	5.93287	5.54988e-09	1.14895e-07	10.041
PDIK1L	0.481086	3.30206	5.93016	5.63618e-09	1.1654e-07	10.0262
TMCC1-AS1	0.783003	-1.37979	5.92952	5.65685e-09	1.16788e-07	10.0227
LINC00707	-1.66934	0.781755	-5.92937	5.66185e-09	1.16788e-07	10.0218
PIP5K1B	1.17657	-0.127318	5.92753	5.72123e-09	1.1787e-07	10.0118
SPIB	1.48695	-0.204972	5.92426	5.82867e-09	1.19938e-07	9.99386
ACKR4	-1.09954	0.348379	-5.92394	5.83915e-09	1.20009e-07	9.99213
RSPH9	0.423648	-0.735066	5.92361	5.85021e-09	1.20091e-07	9.99031
RNF165	1.30904	1.40161	5.92316	5.8651e-09	1.20252e-07	9.98786
ETV2	0.560348	-0.0388465	5.92214	5.89943e-09	1.20811e-07	9.98224
RP11-333E1.1	0.667627	-1.32242	5.91953	5.98759e-09	1.22469e-07	9.96797
CROCCP2	0.626711	3.21392	5.91729	6.06428e-09	1.23889e-07	9.95572
IFT172	0.528205	3.75289	5.90196	6.61542e-09	1.34872e-07	9.87201
ZCWPW1	0.742226	1.56284	5.9019	6.61772e-09	1.34872e-07	9.87167
NINL	0.780566	3.38296	5.90042	6.6733e-09	1.35842e-07	9.86362
C21orf2	0.525223	3.2721	5.89878	6.73569e-09	1.36948e-07	9.85467
FKBP11	0.517627	4.48071	5.89814	6.7603e-09	1.37285e-07	9.85116
STAT1	-0.715052	8.63518	-5.89784	6.7716e-09	1.37351e-07	9.84955
SFXN2	0.633097	2.56137	5.89695	6.80592e-09	1.37883e-07	9.84469
NPM2	1.25997	-0.185791	5.89644	6.82559e-09	1.38117e-07	9.84191
STKLD1	0.619846	-1.34931	5.89381	6.92815e-09	1.39967e-07	9.82756
PDCD1LG2	-0.93805	2.12311	-5.89367	6.93343e-09	1.39967e-07	9.82683
PIEZO1	-0.434574	7.37164	-5.89244	6.98215e-09	1.40783e-07	9.82009
ZFHX2	0.933856	-0.427167	5.89148	7.02024e-09	1.41384e-07	9.81485
C8G	1.12747	-1.22591	5.89078	7.04789e-09	1.41773e-07	9.81107
CTD-2541M15.1	0.612037	-1.70617	5.88984	7.08563e-09	1.42364e-07	9.80593
N4BP1	-0.395534	6.70948	-5.88955	7.09721e-09	1.42398e-07	9.80436
TESC	0.847482	0.105384	5.88937	7.10452e-09	1.42398e-07	9.80337
ATP13A4	1.82061	0.961427	5.88917	7.11237e-09	1.42398e-07	9.80231
TMEM161B-AS1	0.634058	1.08931	5.88743	7.18266e-09	1.43636e-07	9.79285
SLC26A11	0.584982	2.95158	5.88461	7.29832e-09	1.45778e-07	9.77747
TMEM220	0.766779	0.759549	5.88371	7.33567e-09	1.46353e-07	9.77256
CPLX1	0.815533	0.210365	5.88273	7.37643e-09	1.46994e-07	9.76723
ENTPD4	0.483199	5.03998	5.88071	7.4609e-09	1.48503e-07	9.75628
C1orf145	0.88288	-0.918602	5.87852	7.55401e-09	1.50181e-07	9.74434
FCGBP	1.32247	4.50261	5.87744	7.60024e-09	1.50924e-07	9.73847
PCDHGC5	-1.66135	0.211965	-5.87541	7.68778e-09	1.52485e-07	9.72746
RAB3A	0.565995	0.811886	5.87447	7.72887e-09	1.53068e-07	9.72233
ZNF783	0.502936	3.42842	5.87432	7.73515e-09	1.53068e-07	9.72155
BNC1	-0.912656	6.47302	-5.87406	7.74686e-09	1.53122e-07	9.72009
2019-03-09	0.452716	4.02087	5.87243	7.81827e-09	1.54199e-07	9.71126
TADA2A	0.409763	3.75414	5.8724	7.81948e-09	1.54199e-07	9.71111
MYCN	1.14166	-0.392398	5.87209	7.83344e-09	1.54296e-07	9.7094
SBK1	1.28273	1.41296	5.87156	7.85695e-09	1.54581e-07	9.70651
SLC25A29	0.61781	4.06351	5.87101	7.88145e-09	1.54884e-07	9.70352
ZDHHC23	0.780333	2.51041	5.86981	7.93462e-09	1.55749e-07	9.69705
PTGFRN	-0.492351	8.2008	-5.86857	7.99047e-09	1.56665e-07	9.6903
MAN2A2	0.683822	4.22954	5.86416	8.1917e-09	1.6027e-07	9.66638
REEP3	-0.419044	5.80744	-5.86413	8.19315e-09	1.6027e-07	9.66621
SLC7A2	1.31166	2.70559	5.86339	8.22724e-09	1.60752e-07	9.66221
NARFL	0.374952	4.56256	5.86216	8.28464e-09	1.61688e-07	9.65552
HELZ2	-0.631381	6.604	-5.86031	8.37146e-09	1.63196e-07	9.64549
KCNC3	0.963559	1.16365	5.8581	8.47628e-09	1.64885e-07	9.63353
GSTM2	1.30055	2.07344	5.85808	8.47752e-09	1.64885e-07	9.63338
ABHD11	0.610419	4.09678	5.85785	8.48822e-09	1.64885e-07	9.63217
CD276	-0.50161	7.02462	-5.85759	8.50084e-09	1.64885e-07	9.63074
CCBE1	-1.29873	0.277798	-5.85747	8.50649e-09	1.64885e-07	9.6301
RP4-568C11.4	1.10688	1.94679	5.85691	8.53332e-09	1.65217e-07	9.62707
MICAL2	-0.739343	5.79547	-5.85663	8.54689e-09	1.65292e-07	9.62554
AMZ2P1	0.673401	1.61204	5.85606	8.57459e-09	1.65639e-07	9.62243
CIRBP	0.42812	6.79274	5.85582	8.58621e-09	1.65676e-07	9.62113
SRRM2-AS1	0.764178	-1.22326	5.85553	8.60012e-09	1.65757e-07	9.61957
RP11-477D19.2	0.672848	-0.673835	5.8538	8.68446e-09	1.67045e-07	9.61019
PAX9	1.0237	3.98579	5.85375	8.68658e-09	1.67045e-07	9.60995
GMDS-AS1	0.52043	0.542693	5.85293	8.7267e-09	1.67486e-07	9.60552
RP4-794H19.1	-0.891581	-0.31247	-5.85288	8.72914e-09	1.67486e-07	9.60525
TACR2	0.834713	-0.635511	5.85151	8.79687e-09	1.68595e-07	9.59781
NGLY1	0.33121	4.09266	5.84837	8.95355e-09	1.71405e-07	9.58083
PTK7	-0.467167	7.56541	-5.84791	8.97718e-09	1.71617e-07	9.5783
MYH14	1.31729	6.60255	5.84776	8.98478e-09	1.71617e-07	9.57748
CTD-2540F13.2	1.03468	-0.93672	5.84675	9.0358e-09	1.72399e-07	9.57204
CTSL	-0.678725	6.42929	-5.84626	9.06071e-09	1.72608e-07	9.56939
RP13-616I3.1	0.978155	-0.466267	5.84614	9.06706e-09	1.72608e-07	9.56872
RPP25	0.75198	4.17934	5.8439	9.18188e-09	1.74599e-07	9.55661
EXT2	-0.455425	6.7117	-5.8404	9.36398e-09	1.77863e-07	9.53772
EPB41L4A-AS1	0.530686	3.00499	5.83828	9.47647e-09	1.798e-07	9.52624
PTHLH	-1.30313	6.71917	-5.8367	9.56101e-09	1.81202e-07	9.5177
LGALS3BP	-0.493006	9.37383	-5.83434	9.68826e-09	1.83409e-07	9.50498
RMND5B	0.39355	4.75221	5.83268	9.77914e-09	1.84924e-07	9.496
CCDC30	0.630421	-0.449097	5.82763	1.00606e-08	1.90036e-07	9.46871
LAMA3	-1.03867	8.26386	-5.82731	1.00787e-08	1.90167e-07	9.46698
LINC00702	-1.11243	-0.0737461	-5.82666	1.01154e-08	1.90649e-07	9.46349
EREG	-1.93164	3.10253	-5.8253	1.01925e-08	1.91889e-07	9.45619
MT1E	-1.23835	4.91645	-5.82466	1.02296e-08	1.92376e-07	9.45269
RP5-1074L1.4	0.910328	0.179612	5.82049	1.04714e-08	1.96706e-07	9.43022
KSR1	0.622185	4.35653	5.82027	1.04845e-08	1.96734e-07	9.42902
CP	1.84469	1.66185	5.81763	1.06404e-08	1.99441e-07	9.41483
ZNF566	0.685776	1.60313	5.81509	1.07932e-08	2.02082e-07	9.40112
SEC14L5	0.931467	-0.985982	5.81383	1.08695e-08	2.03288e-07	9.39434
2019-09-01	0.713296	2.43715	5.81349	1.08904e-08	2.03454e-07	9.3925
SLC1A1	1.09198	1.0904	5.81322	1.09064e-08	2.0353e-07	9.39109
SESN2	-0.398109	4.41165	-5.8097	1.11239e-08	2.07361e-07	9.3721
NEFH	1.5312	-0.426485	5.80771	1.12485e-08	2.09455e-07	9.36139
IVD	0.784917	4.58281	5.80619	1.1344e-08	2.11003e-07	9.35326
ZNF84	0.514187	3.70263	5.80295	1.15519e-08	2.14635e-07	9.3358
MDM4	0.482765	4.22699	5.80154	1.16429e-08	2.16092e-07	9.32825
ANKRD6	0.986083	1.88143	5.79974	1.17611e-08	2.18047e-07	9.31854
ADCY10P1	0.767637	0.493222	5.79943	1.17814e-08	2.18187e-07	9.31688
LINC01578	0.463645	4.90448	5.79748	1.19101e-08	2.20331e-07	9.30643
SH2D5	-1.33137	2.85719	-5.79616	1.19983e-08	2.21722e-07	9.29934
MLLT1	0.348553	6.15997	5.78976	1.24349e-08	2.29541e-07	9.26498
MRAP2	1.58802	0.706156	5.78858	1.25168e-08	2.30803e-07	9.25867
RP11-635N19.1	0.680485	-0.932075	5.78698	1.2629e-08	2.32619e-07	9.25009
SLC29A2	0.854382	2.91506	5.78628	1.26788e-08	2.33285e-07	9.2463
TMTC4	0.590728	3.36909	5.78558	1.27285e-08	2.33946e-07	9.24254
C1orf115	0.882204	2.82106	5.78526	1.27508e-08	2.33978e-07	9.24086
SARAF	0.305425	7.07645	5.78516	1.27577e-08	2.33978e-07	9.24034
CLDN15	0.604561	1.8922	5.78481	1.27831e-08	2.34192e-07	9.23843
SLC2A11	0.669408	1.3412	5.78296	1.29155e-08	2.36364e-07	9.22852
TFR2	0.982127	0.522037	5.78247	1.29506e-08	2.36751e-07	9.22592
HTRA1	-0.716714	6.93358	-5.78009	1.31235e-08	2.39656e-07	9.21316
CTD-2013N17.6	0.751413	-1.40825	5.77942	1.31731e-08	2.40253e-07	9.20954
FAM71E1	0.915912	0.303178	5.77926	1.31844e-08	2.40253e-07	9.20871
ASMTL	0.277763	-0.660647	5.77857	1.32351e-08	2.40919e-07	9.20503
BCL11A	0.705383	4.23792	5.77605	1.34224e-08	2.44067e-07	9.19152
CTD-2368P22.1	1.02466	-0.174935	5.77412	1.35673e-08	2.46439e-07	9.1812
RP11-228B15.4	0.739742	-0.613319	5.77209	1.37221e-08	2.48985e-07	9.17029
KHDRBS3	0.92523	1.8622	5.76313	1.44228e-08	2.61202e-07	9.12242
ALDH1A1	1.66957	3.67939	5.76309	1.44261e-08	2.61202e-07	9.1222
PHF10	0.369465	5.36273	5.76166	1.45417e-08	2.63016e-07	9.11453
ZNF248	0.492043	2.6039	5.76103	1.45925e-08	2.63655e-07	9.11118
TGFB1	-0.402749	7.03626	-5.76069	1.46197e-08	2.63867e-07	9.10939
PLEC	-0.524882	10.0351	-5.76038	1.46448e-08	2.6404e-07	9.10774
COL9A2	1.08024	2.9905	5.7572	1.49062e-08	2.68468e-07	9.09074
FAM86HP	0.810412	-0.465923	5.75654	1.4961e-08	2.69172e-07	9.08721
ARL4D	-0.715657	5.34865	-5.75538	1.50574e-08	2.70621e-07	9.08103
GPC2	1.02332	0.202594	5.75443	1.51369e-08	2.71762e-07	9.07597
GALNT12	0.935543	2.40381	5.75407	1.51676e-08	2.72027e-07	9.07403
RP13-36G14.4	0.645142	-1.18458	5.75293	1.52636e-08	2.7346e-07	9.06797
RP11-242D8.1	0.574322	-0.248104	5.75107	1.54226e-08	2.7602e-07	9.058
CCDC65	0.550091	-0.167661	5.74948	1.55588e-08	2.78165e-07	9.04955
XIRP1	-1.77581	1.12254	-5.74761	1.57214e-08	2.80777e-07	9.03956
ITPKA	0.906046	0.755343	5.74569	1.58894e-08	2.83479e-07	9.02935
PPM1L	0.869158	3.43252	5.74374	1.6062e-08	2.8626e-07	9.01896
IKBKB	0.42064	5.13403	5.74281	1.61453e-08	2.87444e-07	9.01399
RP11-134G8.7	0.73307	-1.82537	5.74174	1.62415e-08	2.88854e-07	9.00828
RP4-740C4.5	1.04549	-0.846558	5.73804	1.6578e-08	2.94531e-07	8.98858
MAP4K1	0.829745	2.32157	5.73714	1.66609e-08	2.95697e-07	8.98378
RP3-402G11.28	0.691219	-0.900344	5.73401	1.6952e-08	3.00549e-07	8.96714
GTF2IRD2B	0.593447	0.488919	5.73189	1.71517e-08	3.03774e-07	8.95589
RBBP8NL	1.02934	1.37416	5.73161	1.71782e-08	3.03928e-07	8.9544
AC074289.1	1.02691	-0.871439	5.73127	1.72108e-08	3.04188e-07	8.95258
TUBA4A	-0.692163	8.17447	-5.73098	1.72383e-08	3.04359e-07	8.95105
PIK3C2B	0.509977	4.61386	5.73046	1.72884e-08	3.04927e-07	8.94826
ABHD10	0.416459	4.26621	5.72919	1.74102e-08	3.06758e-07	8.94151
ADAM22	1.14581	0.19151	5.72715	1.76076e-08	3.09916e-07	8.93068
EFNB1	-0.487425	7.54744	-5.72332	1.79847e-08	3.16227e-07	8.91032
KLRB1	0.91715	-0.0513322	5.72033	1.82837e-08	3.21057e-07	8.89448
CHADL	0.76994	0.817332	5.7202	1.82971e-08	3.21057e-07	8.89377
DTX2P1-UPK3BP1-PMS2P11	0.697633	-0.184667	5.71859	1.84604e-08	3.2359e-07	8.88523
CTD-3222D19.12	0.68006	-1.03665	5.71745	1.85774e-08	3.25305e-07	8.87917
LINC01569	0.681643	0.328697	5.71666	1.86583e-08	3.25561e-07	8.87499
CHST10	0.961678	1.98096	5.71652	1.86729e-08	3.25561e-07	8.87424
COQ7	0.321835	3.79525	5.71651	1.86735e-08	3.25561e-07	8.87421
PRKX	0.73044	5.16753	5.71638	1.8687e-08	3.25561e-07	8.87351
SETD4	0.430534	3.38356	5.71625	1.87005e-08	3.25561e-07	8.87282
NCK1-AS1	0.605428	1.71821	5.71619	1.87067e-08	3.25561e-07	8.8725
PTPN18	0.491243	4.97728	5.71458	1.88743e-08	3.28143e-07	8.86393
ZNF395	0.486124	5.62298	5.71361	1.89749e-08	3.29557e-07	8.85882
SOX21	1.77656	1.92947	5.71233	1.91102e-08	3.31567e-07	8.852
RAB26	0.97581	0.143467	5.7087	1.94965e-08	3.37926e-07	8.83277
C5orf45	0.586377	2.30669	5.70815	1.95559e-08	3.38583e-07	8.82985
AIM2	-1.1351	3.66654	-5.70792	1.95803e-08	3.38583e-07	8.82865
VMAC	0.489337	1.56689	5.70779	1.9594e-08	3.38583e-07	8.82798
RP11-642P15.1	0.565746	-1.87695	5.70496	1.99024e-08	3.43564e-07	8.81298
MAP4	-0.373599	8.35026	-5.7002	2.04315e-08	3.5234e-07	8.78777
CARD10	-0.696619	5.53779	-5.69856	2.06174e-08	3.55125e-07	8.77907
ULK3	0.413945	4.95039	5.69841	2.06347e-08	3.55125e-07	8.77827
CXCL10	-1.51727	5.15936	-5.69789	2.06938e-08	3.55784e-07	8.77552
AC009506.1	0.569991	0.397568	5.69668	2.08319e-08	3.57796e-07	8.76913
MICALCL	-1.01162	2.22207	-5.69543	2.09756e-08	3.59902e-07	8.76253
RP11-196G11.5	0.44174	1.83741	5.6945	2.10834e-08	3.6098e-07	8.7576
ROBO2	1.67947	-0.0412455	5.69431	2.11058e-08	3.6098e-07	8.75658
TUBA1C	-0.368424	8.3128	-5.69425	2.11125e-08	3.6098e-07	8.75628
ECI1	0.486314	5.18846	5.69416	2.11232e-08	3.6098e-07	8.75579
TMEM156	0.851099	-0.397606	5.69194	2.13824e-08	3.65043e-07	8.74408
CTA-941F9.10	0.731703	-1.42499	5.69143	2.14427e-08	3.65706e-07	8.74137
RP11-499P20.2	0.845577	-1.30847	5.68919	2.17086e-08	3.69872e-07	8.72953
UGT1A6	1.98861	-0.0727358	5.68883	2.17512e-08	3.70227e-07	8.72765
CHCHD6	0.574605	3.39918	5.68483	2.22349e-08	3.78083e-07	8.70652
HRH1	-0.551585	4.16965	-5.68415	2.23178e-08	3.79114e-07	8.70295
LUZP1	-0.444593	6.17354	-5.68307	2.24513e-08	3.81e-07	8.69722
CCDC64	0.655903	4.12851	5.68146	2.26509e-08	3.84006e-07	8.68872
PLIN5	1.10536	-0.959283	5.68021	2.28068e-08	3.86265e-07	8.68213
CCDC57	0.538201	3.7497	5.67988	2.28479e-08	3.86577e-07	8.6804
TNRC6C	0.574829	3.36234	5.67719	2.31888e-08	3.91955e-07	8.66618
IFI27	-0.892336	9.06553	-5.67344	2.36707e-08	3.99705e-07	8.64642
OTX1	0.895927	2.41724	5.67317	2.37057e-08	3.99899e-07	8.64501
ACVR2A	0.511267	3.37137	5.67216	2.38373e-08	4.01721e-07	8.63969
ICAM2	0.66726	1.57198	5.67026	2.40869e-08	4.05527e-07	8.62969
CTC-559E9.1	0.713672	-0.901828	5.66864	2.43022e-08	4.08748e-07	8.62114
RP11-147L13.13	0.689437	0.689407	5.66759	2.44426e-08	4.10703e-07	8.61561
SPTBN4	0.849817	-0.897174	5.66354	2.49911e-08	4.19506e-07	8.5943
ZNF672	0.374258	5.02696	5.66312	2.50481e-08	4.19906e-07	8.59211
FOSL1	-0.841077	6.00146	-5.66301	2.50642e-08	4.19906e-07	8.59149
CASP4	-0.53817	5.93323	-5.65961	2.55343e-08	4.27083e-07	8.57365
FUT6	1.80288	0.626559	5.65955	2.55428e-08	4.27083e-07	8.57333
SOX2-OT	1.31985	-0.320965	5.65782	2.57859e-08	4.30725e-07	8.56423
ANKRD16	0.43491	2.38171	5.65529	2.61464e-08	4.36098e-07	8.5509
FAM168B	0.391091	6.77985	5.6552	2.61587e-08	4.36098e-07	8.55045
TRIM6	-0.8194	1.63952	-5.65343	2.64138e-08	4.39921e-07	8.54113
TNC	-1.08643	9.20712	-5.65136	2.67149e-08	4.44501e-07	8.53025
USP21	0.374132	4.3972	5.64734	2.73087e-08	4.53938e-07	8.50914
PHKA2	0.438191	4.33387	5.64685	2.73822e-08	4.54686e-07	8.50656
SOX2	1.53753	4.63418	5.64668	2.74071e-08	4.54686e-07	8.50569
ARHGEF19	0.598284	5.18317	5.64581	2.75379e-08	4.5641e-07	8.50112
FAM184B	1.10586	-1.3923	5.645	2.76604e-08	4.57995e-07	8.49685
KSR2	1.19973	-1.45712	5.64445	2.77428e-08	4.58914e-07	8.494
MMP28	-1.13943	4.43243	-5.64423	2.77757e-08	4.59012e-07	8.49286
GABRP	2.12901	1.41134	5.64314	2.79425e-08	4.61322e-07	8.48711
MAMSTR	0.657628	1.30339	5.64237	2.80606e-08	4.62823e-07	8.48306
CTB-50L17.8	0.80674	-0.525941	5.64112	2.8252e-08	4.65529e-07	8.47654
RP11-160O5.1	1.0021	-0.1094	5.6404	2.83634e-08	4.66914e-07	8.47276
GOLPH3L	0.506398	4.48798	5.63997	2.8431e-08	4.67574e-07	8.47047
RP11-244O19.1	-0.998996	1.70127	-5.63827	2.86947e-08	4.71457e-07	8.46161
RBMS2	-0.454937	5.15694	-5.63566	2.91077e-08	4.77781e-07	8.44789
ATAT1	0.488877	2.57621	5.63535	2.91559e-08	4.77843e-07	8.4463
MFI2-AS1	0.935417	0.558638	5.63528	2.91675e-08	4.77843e-07	8.44592
FAXC	1.26881	1.19951	5.6338	2.94047e-08	4.81265e-07	8.43814
NBPF11	0.578728	1.19496	5.63061	2.99203e-08	4.89234e-07	8.42145
CUZD1	0.917841	-1.18542	5.6272	3.04817e-08	4.97936e-07	8.40361
MPPED2	1.44882	-0.834335	5.62679	3.05503e-08	4.98579e-07	8.40145
IZUMO4	0.776747	0.945806	5.62506	3.08389e-08	5.02808e-07	8.39242
ZC2HC1C	0.601795	0.303049	5.62436	3.09572e-08	5.0354e-07	8.38875
RASL11A	0.820505	1.32677	5.62428	3.09705e-08	5.0354e-07	8.38834
FRAT1	0.549271	1.68144	5.62427	3.09725e-08	5.0354e-07	8.38827
BCAS1	1.23813	1.18027	5.62225	3.13146e-08	5.08617e-07	8.37773
IFT122	0.453199	4.43089	5.62041	3.16311e-08	5.12996e-07	8.36808
ISYNA1	0.963257	4.1229	5.62033	3.16445e-08	5.12996e-07	8.36767
BDNF-AS	0.779653	-0.665881	5.61686	3.22473e-08	5.22271e-07	8.34956
RRAS2	-0.479365	4.94802	-5.61634	3.23394e-08	5.23266e-07	8.34682
ZNF232	0.478478	2.62858	5.61612	3.23782e-08	5.23397e-07	8.34567
PDE9A	0.946359	1.30731	5.61451	3.26621e-08	5.27485e-07	8.33729
OGDHL	1.56059	0.0306325	5.61227	3.30625e-08	5.33446e-07	8.32559
LY6E	-0.659081	8.68063	-5.61168	3.31698e-08	5.34518e-07	8.32249
RERG	1.05988	0.0981063	5.61156	3.31917e-08	5.34518e-07	8.32185
RP3-508I15.9	0.558315	0.185292	5.61044	3.33936e-08	5.37262e-07	8.31603
RND1	0.858261	0.967424	5.60826	3.37911e-08	5.43143e-07	8.30467
HAGH	0.373302	4.51917	5.60733	3.39635e-08	5.454e-07	8.29979
RTCA	-0.256439	4.91151	-5.60649	3.41177e-08	5.47106e-07	8.29544
INMT	0.860074	0.552486	5.60641	3.41339e-08	5.47106e-07	8.29498
2019-09-03	1.10798	1.00568	5.60443	3.45029e-08	5.52501e-07	8.28466
CSPG5	0.919456	-0.46557	5.60356	3.46658e-08	5.54588e-07	8.28015
MAP2K5	0.289433	3.89232	5.6032	3.4733e-08	5.55142e-07	8.27829
ADAM28	1.04061	2.16786	5.60229	3.49058e-08	5.57365e-07	8.27352
SOX21-AS1	1.45891	1.35884	5.60195	3.497e-08	5.57365e-07	8.27176
ITGA2B	0.78567	-0.322324	5.60195	3.49703e-08	5.57365e-07	8.27175
MAFG-AS1	0.723723	1.46797	5.60065	3.52178e-08	5.60785e-07	8.26498
TMEM178B	1.57492	0.646177	5.60012	3.53192e-08	5.61875e-07	8.26222
ZNF879	0.932272	0.138477	5.59878	3.55767e-08	5.65e-07	8.25525
COX7C	0.383172	6.95566	5.59876	3.55819e-08	5.65e-07	8.25511
RSAD1	0.354457	4.21744	5.59783	3.57613e-08	5.67319e-07	8.25029
ASB9	0.85627	0.113891	5.59475	3.63637e-08	5.76339e-07	8.23425
GNA14	0.741141	-0.622659	5.59206	3.68985e-08	5.84271e-07	8.22024
RP11-66N24.3	0.784672	-0.146792	5.58935	3.74455e-08	5.92014e-07	8.20612
PPFIBP1	-0.447934	6.05394	-5.58929	3.74569e-08	5.92014e-07	8.20583
ANKLE1	1.05004	-0.38017	5.588	3.77206e-08	5.95629e-07	8.1991
REM2	0.796699	-1.58935	5.58686	3.79537e-08	5.98755e-07	8.19319
APBB2	-0.51825	5.12537	-5.5858	3.81711e-08	6.01628e-07	8.1877
RP11-481J2.4	0.649568	-1.36582	5.58363	3.86242e-08	6.08207e-07	8.17638
PGPEP1	0.689016	3.18915	5.57355	4.07895e-08	6.41584e-07	8.12404
TSPY26P	0.897035	1.08565	5.57336	4.08308e-08	6.41584e-07	8.12307
ASPSCR1	0.470422	4.60432	5.57324	4.08568e-08	6.41584e-07	8.12246
WI2-1896O14.1	-1.24677	0.0448723	-5.57282	4.09513e-08	6.42475e-07	8.12025
ZDHHC2	1.09067	2.9639	5.57255	4.1011e-08	6.42821e-07	8.11885
ING5	0.407022	3.87479	5.57214	4.11015e-08	6.43646e-07	8.11673
CDK6	-0.705242	6.46025	-5.57163	4.12138e-08	6.44813e-07	8.11412
AP3B2	1.27639	0.189414	5.56879	4.1852e-08	6.54196e-07	8.09937
INF2	-0.381384	6.93084	-5.5682	4.1985e-08	6.55675e-07	8.09633
RASA4CP	0.658396	0.856633	5.56795	4.20417e-08	6.55959e-07	8.09503
HLA-C	-0.563546	10.3041	-5.56391	4.29699e-08	6.69828e-07	8.07408
SLC6A11	-1.68864	2.85726	-5.56296	4.31909e-08	6.72658e-07	8.06916
CADM4	0.732657	4.83204	5.56191	4.34373e-08	6.75735e-07	8.0637
TBCD	0.35741	6.17333	5.56172	4.34819e-08	6.75735e-07	8.06272
FAM149A	1.00652	-0.119876	5.56161	4.35075e-08	6.75735e-07	8.06215
MTMR9LP	0.719164	0.691061	5.56054	4.37595e-08	6.78706e-07	8.05661
PHGDH	0.98084	5.16901	5.56046	4.37785e-08	6.78706e-07	8.0562
AC011738.4	-1.26214	-0.991223	-5.55906	4.41106e-08	6.83233e-07	8.04895
RNF149	-0.284446	6.27594	-5.55874	4.4186e-08	6.83779e-07	8.04731
MSI2	0.570006	5.07302	5.55757	4.44658e-08	6.87485e-07	8.04125
NMNAT3	0.93245	2.55413	5.55738	4.45113e-08	6.87565e-07	8.04027
ETNK2	0.925198	3.75419	5.55662	4.46936e-08	6.8914e-07	8.03635
SAPCD2	0.755254	4.51002	5.55662	4.46942e-08	6.8914e-07	8.03634
EDNRA	-0.775529	3.89803	-5.55517	4.50455e-08	6.93928e-07	8.02883
RP11-115C21.2	0.503842	1.70254	5.55376	4.53888e-08	6.98586e-07	8.02154
ATP6V1D	-0.332331	6.10322	-5.55359	4.543e-08	6.98589e-07	8.02067
C12orf73	0.40441	2.36579	5.5506	4.61701e-08	7.09111e-07	8.00517
ZNHIT3	0.30004	4.4739	5.55043	4.62108e-08	7.09111e-07	8.00433
MCCC1	0.551357	4.78247	5.55032	4.62391e-08	7.09111e-07	8.00374
ZNF599	0.479087	1.56405	5.5463	4.72512e-08	7.23979e-07	7.98297
HAS2	-1.0537	2.73846	-5.54378	4.78979e-08	7.33229e-07	7.96993
RGS9	0.775814	-0.478092	5.54107	4.86e-08	7.43309e-07	7.95597
STAT2	-0.446814	7.00921	-5.54032	4.87966e-08	7.45647e-07	7.9521
CHPF	-0.510995	7.13697	-5.53714	4.96398e-08	7.57187e-07	7.93567
SEC31B	0.892837	0.918592	5.53713	4.96407e-08	7.57187e-07	7.93565
LPCAT1	-0.520672	6.1803	-5.53638	4.98412e-08	7.59566e-07	7.93178
C7orf55	0.512248	1.93355	5.53381	5.05349e-08	7.6945e-07	7.91853
FAP	-1.00214	3.87958	-5.53108	5.12814e-08	7.80119e-07	7.90446
KCNMB3	0.881786	-0.22517	5.53062	5.14086e-08	7.81356e-07	7.90209
GJA1	-0.839418	8.51145	-5.52985	5.16236e-08	7.83925e-07	7.89808
TLE3	0.358282	6.43219	5.52951	5.17167e-08	7.84638e-07	7.89636
HMGN3	0.501838	5.34237	5.52933	5.17658e-08	7.84685e-07	7.89545
KLHL26	0.483384	3.16961	5.52915	5.18184e-08	7.84784e-07	7.89447
TRMT2B	0.422477	3.95923	5.52846	5.20111e-08	7.87002e-07	7.89091
ELK3	-0.417372	6.26605	-5.52773	5.22132e-08	7.8936e-07	7.88719
FHL3	-0.427113	4.78117	-5.5263	5.26178e-08	7.94771e-07	7.87979
CAPN10-AS1	0.626766	-0.269836	5.5257	5.27861e-08	7.96607e-07	7.87673
GOLGA8A	1.11844	3.04205	5.52516	5.29401e-08	7.98225e-07	7.87393
WDR83	0.390436	2.46235	5.52308	5.35333e-08	8.06455e-07	7.86325
RGL3	0.959823	-1.44382	5.52261	5.36692e-08	8.07787e-07	7.86082
LPAR3	-0.871331	4.70715	-5.52181	5.39006e-08	8.10554e-07	7.85669
BDKRB1	-0.795346	2.21476	-5.51833	5.49157e-08	8.24577e-07	7.8388
RAD51-AS1	0.625643	0.328817	5.51828	5.49298e-08	8.24577e-07	7.83855
NIPAL4	-1.31604	5.19773	-5.51798	5.50196e-08	8.25196e-07	7.83699
PKI55	0.588959	1.66974	5.51624	5.55345e-08	8.32188e-07	7.82805
RUSC1-AS1	0.695728	0.963767	5.51584	5.56548e-08	8.33257e-07	7.82598
GPRASP1	0.722419	0.509419	5.51449	5.60596e-08	8.38217e-07	7.81903
SERHL2	0.587888	0.219995	5.5144	5.60845e-08	8.38217e-07	7.8186
HYPK	0.515508	0.0722471	5.51295	5.65219e-08	8.44015e-07	7.81115
LINC00176	0.893548	-0.711909	5.51182	5.68652e-08	8.48397e-07	7.80535
TRIM52	0.480693	1.97745	5.51129	5.7029e-08	8.50092e-07	7.80259
MPC2	0.38976	4.71466	5.51112	5.70786e-08	8.50092e-07	7.80176
SRSF12	1.11998	-0.985616	5.51026	5.73441e-08	8.53301e-07	7.79731
C17orf107	0.574229	1.26246	5.50982	5.74773e-08	8.54536e-07	7.79508
HSD17B7P2	0.741086	-0.509868	5.50806	5.80245e-08	8.61919e-07	7.786
CDKN1B	0.404632	5.38906	5.50784	5.80923e-08	8.62175e-07	7.78488
ADH7	2.22076	3.13528	5.50545	5.88396e-08	8.72506e-07	7.77262
RP11-213G2.3	0.761077	-0.323111	5.50402	5.92909e-08	8.78434e-07	7.76529
CYP2D6	0.883546	-1.25839	5.50271	5.97093e-08	8.83863e-07	7.75855
MUL1	-0.2825	5.39652	-5.50224	5.98583e-08	8.8493e-07	7.75616
SERPINI1	0.918408	1.5326	5.50216	5.98852e-08	8.8493e-07	7.75573
MVP	-0.382514	7.93208	-5.50134	6.01475e-08	8.88036e-07	7.75154
RABEP2	0.345087	4.67896	5.50068	6.03622e-08	8.90435e-07	7.74812
DUSP28	0.407837	1.2251	5.50051	6.04162e-08	8.9046e-07	7.74727
ACTR1B	0.380833	5.64874	5.49962	6.07037e-08	8.93923e-07	7.74272
AF131215.2	1.0101	-0.399582	5.49899	6.09087e-08	8.95067e-07	7.73948
MYLIP	0.731353	4.01266	5.49896	6.09201e-08	8.95067e-07	7.7393
FAM83A	-1.20201	7.47275	-5.4989	6.09389e-08	8.95067e-07	7.73901
RP4-669K10.8	0.772075	-1.71819	5.49838	6.11082e-08	8.96779e-07	7.73635
HOXC13-AS	-1.31253	0.849611	-5.49776	6.13114e-08	8.98987e-07	7.73317
MN1	-0.854921	4.74198	-5.49665	6.1676e-08	9.03556e-07	7.72748
IRGQ	0.335545	4.80894	5.49524	6.21419e-08	9.09599e-07	7.72027
SPPL2B	0.408513	4.78995	5.49357	6.27003e-08	9.16985e-07	7.71169
B2M	-0.485224	11.262	-5.49194	6.32483e-08	9.24206e-07	7.70335
PGAM1	-0.364791	6.35602	-5.49077	6.36436e-08	9.29185e-07	7.69737
ADAD2	0.902816	-1.02167	5.48876	6.4332e-08	9.38431e-07	7.68706
RIPK2	-0.376161	4.41531	-5.48737	6.48116e-08	9.44619e-07	7.67994
C1orf132	0.73459	-0.255837	5.48676	6.50214e-08	9.46867e-07	7.67684
NRL	0.452955	-0.0977384	5.48655	6.50962e-08	9.46958e-07	7.67574
NPRL2	0.384021	3.33982	5.48642	6.51388e-08	9.46958e-07	7.67511
NRP1	-0.608856	5.72369	-5.48622	6.52092e-08	9.47174e-07	7.67408
EVA1A	-0.973352	2.49989	-5.48509	6.56038e-08	9.52094e-07	7.66829
CGNL1	1.05264	1.96691	5.48397	6.59978e-08	9.56996e-07	7.66255
RP11-218E20.3	-0.875019	0.632582	-5.482	6.66954e-08	9.6629e-07	7.65247
THBS1	-0.942567	7.61984	-5.4818	6.67657e-08	9.66486e-07	7.65146
IGF2BP2	-0.926941	5.81705	-5.48112	6.70094e-08	9.6919e-07	7.64797
SORCS2	-1.10005	3.52653	-5.47998	6.74155e-08	9.74237e-07	7.64218
PRRG1	-0.728461	2.85654	-5.4768	6.85711e-08	9.90097e-07	7.62589
PPARGC1B	0.618777	3.42816	5.47451	6.94109e-08	1.00137e-06	7.61422
GBAP1	0.531417	0.584598	5.4731	6.99337e-08	1.00763e-06	7.60703
ITGA6	-0.73177	9.39966	-5.47298	6.99805e-08	1.00763e-06	7.60639
SPATA6	0.771891	0.773573	5.47287	7.00216e-08	1.00763e-06	7.60582
TTPAL	-0.430716	5.29638	-5.47231	7.02309e-08	1.00946e-06	7.60296
GNA12	-0.410089	6.41555	-5.47221	7.02676e-08	1.00946e-06	7.60246
DBIL5P	0.595208	-1.66782	5.47058	7.08801e-08	1.0174e-06	7.59414
YWHAZ	-0.353482	10.5368	-5.46999	7.11023e-08	1.01973e-06	7.59114
UBAP1L	0.672803	0.0118627	5.46932	7.13567e-08	1.02252e-06	7.58772
KAT8	0.327269	4.60545	5.4673	7.21284e-08	1.03271e-06	7.57741
CTD-2357A8.3	-1.05876	-0.100709	-5.46576	7.27201e-08	1.04031e-06	7.56958
EHD4	-0.343166	6.56213	-5.46271	7.39118e-08	1.05647e-06	7.554
POLR2J3	0.783935	1.8083	5.46209	7.41541e-08	1.05904e-06	7.55086
RAB38	-0.837709	5.56751	-5.46173	7.42963e-08	1.05997e-06	7.54903
ZNF767P	0.644439	2.12492	5.46161	7.43432e-08	1.05997e-06	7.54842
BMP7	1.13469	5.00669	5.46041	7.48222e-08	1.0659e-06	7.54227
CH17-264L24.1	0.856901	-1.25901	5.46005	7.49658e-08	1.06668e-06	7.54043
CTD-2349P21.9	0.61513	-1.6898	5.45996	7.50016e-08	1.06668e-06	7.53997
TTC13	0.363819	3.66881	5.45975	7.50833e-08	1.06695e-06	7.53893
TMEM97	0.590004	4.44818	5.45928	7.52717e-08	1.06873e-06	7.53653
ZNF500	0.312003	3.36993	5.45869	7.55066e-08	1.07108e-06	7.53354
TF	1.66415	0.502237	5.45855	7.5563e-08	1.07108e-06	7.53283
ING3	0.428069	2.80519	5.45807	7.5757e-08	1.07294e-06	7.53037
IPO5P1	0.998342	0.371422	5.45717	7.612e-08	1.07719e-06	7.52579
CCDC28A	0.358522	3.68959	5.45579	7.66798e-08	1.08421e-06	7.51876
PRSS23	-0.741903	6.5958	-5.45499	7.70093e-08	1.08796e-06	7.51466
RHPN1	1.00148	2.05882	5.45373	7.75226e-08	1.09431e-06	7.50829
RP11-97C16.1	0.717733	-0.895627	5.45258	7.8001e-08	1.10015e-06	7.50239
DBI	0.434592	6.88612	5.45224	7.81408e-08	1.10086e-06	7.50068
KCNJ11	1.14505	-0.141693	5.45214	7.81809e-08	1.10086e-06	7.50019
RP1-266L20.2	0.708654	-0.823101	5.45102	7.86494e-08	1.10655e-06	7.49446
BATF2	-1.14562	2.77164	-5.45042	7.89008e-08	1.10917e-06	7.4914
ACADSB	0.632306	3.36887	5.4501	7.90311e-08	1.11008e-06	7.48982
NIPSNAP3B	0.824938	-0.972769	5.44939	7.93297e-08	1.11336e-06	7.48621
C11orf54	0.41424	3.34471	5.44907	7.9465e-08	1.11434e-06	7.48457
ARL14	-1.47178	0.0380346	-5.44766	8.00632e-08	1.12181e-06	7.47739
ZFP3	0.905639	1.81244	5.44643	8.0589e-08	1.12825e-06	7.47112
AKAP17A	0.243113	-0.434315	5.44547	8.09978e-08	1.13304e-06	7.46627
POMGNT2	0.559126	3.31643	5.44339	8.18963e-08	1.14467e-06	7.4557
ZNF740	0.354437	4.97043	5.4415	8.27233e-08	1.15528e-06	7.44607
RPS27	0.399282	8.60846	5.44054	8.31449e-08	1.16021e-06	7.4412
HOXC13	-1.22746	2.58688	-5.44022	8.32863e-08	1.16047e-06	7.43957
YPEL3	0.404232	4.79771	5.44019	8.32992e-08	1.16047e-06	7.43942
GPS2	0.512073	1.13244	5.43908	8.37893e-08	1.16634e-06	7.4338
RBP5	0.704533	0.558614	5.43806	8.42448e-08	1.17173e-06	7.4286
OVGP1	0.738206	-0.484092	5.43745	8.45152e-08	1.17398e-06	7.42553
DUSP7	-0.460887	6.99424	-5.43739	8.45448e-08	1.17398e-06	7.4252
NT5M	0.971373	0.524819	5.4364	8.4988e-08	1.17917e-06	7.42019
ILDR1	1.0553	2.12898	5.43522	8.55233e-08	1.18564e-06	7.41417
ZNF571	0.770909	0.512031	5.43355	8.62821e-08	1.19518e-06	7.40571
PDPN	-0.803229	6.68052	-5.43227	8.68683e-08	1.20232e-06	7.39922
SNHG20	0.60081	1.44443	5.43208	8.6956e-08	1.20256e-06	7.39826
CTD-2574D22.3	0.785593	-0.939721	5.43192	8.70305e-08	1.20262e-06	7.39744
RP11-81A1.6	0.56912	0.155617	5.4313	8.73138e-08	1.20555e-06	7.39432
GTPBP3	0.392526	4.16892	5.4303	8.77784e-08	1.21099e-06	7.38924
MMP10	-1.65832	5.24017	-5.42959	8.81097e-08	1.21431e-06	7.38563
MED9	0.31559	3.8391	5.42948	8.81617e-08	1.21431e-06	7.38506
GPR39	-1.10376	1.52087	-5.42855	8.85964e-08	1.21931e-06	7.38035
PTN	1.36685	2.74428	5.42825	8.87369e-08	1.22026e-06	7.37883
ABHD8	0.539405	3.23223	5.42762	8.90311e-08	1.22332e-06	7.37566
TAPT1	0.335675	3.65175	5.4267	8.94684e-08	1.22833e-06	7.37097
pk	-0.510017	6.30131	-5.42368	9.09055e-08	1.24698e-06	7.3557
CLDN7	0.974165	5.63413	5.42354	9.09727e-08	1.24698e-06	7.35499
LINC00346	-0.760363	2.33766	-5.41924	9.30666e-08	1.27465e-06	7.33319
NIFK-AS1	0.461976	1.21511	5.41757	9.389e-08	1.28393e-06	7.32475
TG	1.07832	0.080577	5.41756	9.38948e-08	1.28393e-06	7.3247
SGSM2	0.419507	4.91059	5.41723	9.40583e-08	1.28514e-06	7.32304
TLL1	-1.23952	1.52245	-5.41481	9.5269e-08	1.30064e-06	7.31079
C20orf96	0.694042	1.52984	5.41384	9.57575e-08	1.30626e-06	7.30589
ANTXR2	-0.760453	4.65257	-5.41361	9.58721e-08	1.30678e-06	7.30474
TTC28	0.817963	3.14453	5.41296	9.62041e-08	1.31025e-06	7.30143
POPDC3	-1.34318	1.44914	-5.40998	9.7728e-08	1.32994e-06	7.28638
FEZ1	-0.84559	4.59862	-5.40979	9.78273e-08	1.33023e-06	7.2854
WDR90	0.538639	4.21607	5.40953	9.79626e-08	1.33101e-06	7.28408
SAP30L	0.352712	4.75532	5.40741	9.90593e-08	1.34484e-06	7.27341
RP11-147L13.12	0.610949	-0.651917	5.40709	9.92295e-08	1.34608e-06	7.27177
RPARP-AS1	0.570577	2.22174	5.4065	9.95357e-08	1.349e-06	7.26882
PLS3	-0.347658	7.36662	-5.40638	9.96034e-08	1.349e-06	7.26817
MTMR7	0.5447	-0.370116	5.40447	1.00608e-07	1.36152e-06	7.25856
SPATA41	0.633886	-0.631112	5.40364	1.0105e-07	1.36642e-06	7.25436
RP11-111M22.3	0.700755	0.83682	5.40316	1.01305e-07	1.36879e-06	7.25194
SAFB2	0.29578	5.4512	5.4005	1.02733e-07	1.38698e-06	7.23853
TMTC2	0.637737	3.44435	5.39997	1.03024e-07	1.38981e-06	7.23583
SERPING1	-0.758934	7.14267	-5.39978	1.03128e-07	1.39011e-06	7.23486
MMP14	-0.481604	9.05372	-5.3967	1.0481e-07	1.41167e-06	7.21936
NMI	-0.400234	5.11665	-5.39053	1.08272e-07	1.45715e-06	7.18824
COX5B	0.448448	6.38591	5.39021	1.08453e-07	1.45842e-06	7.18665
POLR2J4	0.418653	1.19244	5.38928	1.08986e-07	1.46444e-06	7.18195
KLRG1	0.807425	-1.46438	5.38895	1.09173e-07	1.4658e-06	7.1803
SLC16A14	0.948096	1.93807	5.38869	1.09327e-07	1.46671e-06	7.17895
ZNF10	0.616606	1.66436	5.38839	1.09495e-07	1.46686e-06	7.17749
DGKE	0.568948	2.56109	5.38837	1.09511e-07	1.46686e-06	7.17735
ANXA2	-0.3608	10.529	-5.38809	1.09672e-07	1.46787e-06	7.17594
FLJ37453	0.536912	1.58222	5.38729	1.10133e-07	1.47288e-06	7.17192
YJEFN3	1.02321	-0.0544818	5.38614	1.10803e-07	1.4798e-06	7.16611
ZNF703	0.676978	5.0472	5.3861	1.10825e-07	1.4798e-06	7.16593
HLA-E	-0.398282	9.70705	-5.38434	1.11854e-07	1.49149e-06	7.15708
GSTM4	0.826076	3.49963	5.3843	1.11875e-07	1.49149e-06	7.15689
TMEM81	0.401885	0.98559	5.38407	1.12013e-07	1.49216e-06	7.15571
THAP7	0.427764	4.49702	5.38296	1.1267e-07	1.49975e-06	7.15011
SMIM22	1.57547	0.234334	5.38223	1.13099e-07	1.50427e-06	7.14648
LIN7B	0.514027	1.8786	5.38065	1.14041e-07	1.51522e-06	7.13853
TRAPPC9	0.371766	4.91993	5.38056	1.14099e-07	1.51522e-06	7.13804
GALNT2	-0.40863	7.30564	-5.38034	1.14228e-07	1.51575e-06	7.13696
SCUBE2	1.06181	1.0597	5.37984	1.14528e-07	1.51854e-06	7.13445
NAALADL2	1.08134	0.805714	5.3794	1.14795e-07	1.5209e-06	7.13222
RAB11B-AS1	0.452303	1.14115	5.37917	1.14935e-07	1.52157e-06	7.13105
RP11-726G1.1	0.841826	-1.1723	5.37762	1.15873e-07	1.5321e-06	7.12327
MYL5	0.535523	2.42503	5.37756	1.1591e-07	1.5321e-06	7.12296
BCAT2	0.450934	4.88094	5.37621	1.1673e-07	1.54174e-06	7.11622
PLEKHG6	1.06502	3.74101	5.37603	1.16843e-07	1.54204e-06	7.11529
SELP	1.24041	1.17747	5.3754	1.17227e-07	1.54591e-06	7.11214
SLC16A2	-0.891838	3.75124	-5.37515	1.17381e-07	1.54674e-06	7.11089
SAMD9L	-0.809229	4.87158	-5.37409	1.18039e-07	1.55422e-06	7.10553
NOVA1	1.11375	-0.971915	5.37122	1.1983e-07	1.57658e-06	7.09112
ACTR3B	0.479991	2.01488	5.36966	1.20812e-07	1.58827e-06	7.0833
SHMT1	0.475969	4.92464	5.3683	1.21679e-07	1.59843e-06	7.07646
IRS1	-0.724255	5.58393	-5.36689	1.22582e-07	1.60906e-06	7.06937
MDP1	0.474688	0.0247506	5.36583	1.23262e-07	1.61607e-06	7.06408
XYLB	0.553931	1.47333	5.36576	1.23307e-07	1.61607e-06	7.06373
CDK5RAP3	0.395404	5.93228	5.36519	1.23675e-07	1.61966e-06	7.06087
C5orf30	0.540424	2.56144	5.36465	1.2403e-07	1.62306e-06	7.05813
SLC2A9	-0.630045	4.06976	-5.36367	1.24665e-07	1.62983e-06	7.05324
INPP4B	-0.797405	3.96445	-5.36356	1.24739e-07	1.62983e-06	7.05268
CCDC157	0.467127	0.79871	5.36243	1.25478e-07	1.63773e-06	7.04702
C9orf172	0.688577	1.37524	5.36234	1.25535e-07	1.63773e-06	7.04658
REEP2	0.88641	0.353629	5.36101	1.26413e-07	1.64792e-06	7.03991
PNCK	1.52729	1.04315	5.36042	1.26808e-07	1.6518e-06	7.03693
SETMAR	0.481861	2.60727	5.35883	1.27869e-07	1.66435e-06	7.02895
STOX1	1.28922	-0.370014	5.35858	1.28035e-07	1.66523e-06	7.02771
PTRF	-0.464289	8.75554	-5.35724	1.28932e-07	1.67563e-06	7.02102
LRIG1	0.783661	4.51561	5.35678	1.29245e-07	1.67842e-06	7.0187
CCDC25	0.324216	5.04092	5.35553	1.30093e-07	1.68814e-06	7.01244
DBP	0.599519	3.61821	5.35507	1.30404e-07	1.69089e-06	7.01016
AKR7A3	0.920894	-1.08958	5.34954	1.34232e-07	1.7392e-06	6.98246
FAM229A	0.681509	0.00803973	5.34837	1.35054e-07	1.74851e-06	6.97662
RP5-908M14.10	0.680759	-1.6004	5.34817	1.35196e-07	1.74903e-06	6.97561
PRRT1	0.53869	0.544797	5.34748	1.35687e-07	1.75404e-06	6.97214
ZNF692	0.57755	3.77881	5.34732	1.35802e-07	1.7542e-06	6.97133
C5orf66-AS1	1.51266	-0.360225	5.34649	1.36388e-07	1.75995e-06	6.96721
AC009961.3	0.550893	-1.50781	5.3464	1.36453e-07	1.75995e-06	6.96675
EFCC1	0.793435	-0.534737	5.34599	1.36746e-07	1.76238e-06	6.9647
RP11-304L19.11	0.555711	-0.828109	5.34515	1.37346e-07	1.76879e-06	6.9605
GNAZ	1.00966	0.260456	5.34339	1.38615e-07	1.78378e-06	6.9517
PROCR	-0.692817	4.56884	-5.34315	1.38789e-07	1.78468e-06	6.9505
AHI1	0.417258	2.99818	5.34086	1.40461e-07	1.80481e-06	6.93904
XXbac-BPG283O16.9	0.521514	2.04931	5.3387	1.42052e-07	1.82387e-06	6.92826
MLPH	0.99916	1.73599	5.33579	1.4422e-07	1.85032e-06	6.91376
LRRC56	0.669949	1.55405	5.33512	1.44732e-07	1.85549e-06	6.91037
GMPPB	0.28421	4.39727	5.3348	1.44966e-07	1.85637e-06	6.90882
HSD11B1L	0.756425	1.58854	5.33474	1.45019e-07	1.85637e-06	6.90847
TRIM22	-0.780978	5.90454	-5.33146	1.4752e-07	1.88697e-06	6.89211
GOLGA2P5	0.813866	1.17886	5.33111	1.47788e-07	1.88899e-06	6.89037
CDHR3	0.755606	0.141312	5.32975	1.4884e-07	1.89969e-06	6.88359
SLC26A1	0.724948	-0.0497217	5.32962	1.48938e-07	1.89969e-06	6.88295
FLRT2	-1.03495	4.76288	-5.32959	1.4896e-07	1.89969e-06	6.88281
IFI44L	-1.1328	4.74407	-5.32906	1.49374e-07	1.90354e-06	6.88016
TPM3	-0.252477	8.60089	-5.32754	1.50559e-07	1.91721e-06	6.87259
FOXF1	0.786072	1.22832	5.32693	1.5104e-07	1.9219e-06	6.86954
RP11-12G12.7	0.609527	2.2517	5.32618	1.51631e-07	1.92797e-06	6.86581
C6orf136	0.368563	3.57691	5.3259	1.51852e-07	1.92808e-06	6.86441
TRIM2	0.855137	4.70893	5.32586	1.51885e-07	1.92808e-06	6.8642
TBX6	0.865295	1.63042	5.32574	1.51979e-07	1.92808e-06	6.86361
ZNF512	0.464959	3.62075	5.32508	1.52499e-07	1.93324e-06	6.86034
CALD1	-0.592593	7.4576	-5.3248	1.52723e-07	1.93465e-06	6.85893
OAS1	-0.680557	6.37844	-5.32451	1.52955e-07	1.93564e-06	6.85749
TMEM52	0.916917	0.0949124	5.32442	1.53029e-07	1.93564e-06	6.85702
NUP210	1.00333	5.31709	5.32335	1.53879e-07	1.94495e-06	6.85172
FXYD6	1.08211	2.01514	5.32304	1.54128e-07	1.94666e-06	6.85017
RAB11FIP5	-0.350772	5.68898	-5.32256	1.54516e-07	1.94993e-06	6.84777
TTC21A	0.508764	0.408009	5.32243	1.54617e-07	1.94993e-06	6.84714
PCMTD2	0.41631	4.77688	5.32159	1.55296e-07	1.95705e-06	6.84295
PTCH2	0.823761	-0.673575	5.32078	1.55957e-07	1.96393e-06	6.83888
HES2	-0.808273	5.9012	-5.32003	1.56562e-07	1.97009e-06	6.83518
TXNDC16	0.618649	2.62221	5.31962	1.56901e-07	1.9729e-06	6.83311
LINC00087	0.721774	-0.0868478	5.31947	1.57019e-07	1.97293e-06	6.83239
AC022007.5	0.56707	-0.186354	5.31762	1.58536e-07	1.98975e-06	6.82319
FCHO1	0.812224	2.12445	5.31744	1.58691e-07	1.98975e-06	6.82225
N4BP3	0.509166	3.52391	5.31741	1.58708e-07	1.98975e-06	6.82215
FAM126A	-0.482285	5.28131	-5.31486	1.60834e-07	2.01492e-06	6.80942
MTERF2	0.462913	2.04482	5.31468	1.60985e-07	2.01533e-06	6.80852
XKR6	0.830363	-0.247595	5.31391	1.61624e-07	2.02185e-06	6.80473
GNRH1	0.812839	-0.907282	5.31203	1.63212e-07	2.04022e-06	6.79537
AK7	0.925458	-0.31511	5.31164	1.63546e-07	2.04288e-06	6.79342
CMPK2	-0.896013	3.87913	-5.31135	1.63788e-07	2.04441e-06	6.792
RP4-614O4.13	0.636484	-0.15332	5.30943	1.65434e-07	2.06344e-06	6.78243
E2F2	0.585594	3.7104	5.3084	1.66321e-07	2.07299e-06	6.77732
PLK2	-0.62442	6.17545	-5.30799	1.66671e-07	2.07504e-06	6.77531
SARM1	0.782799	0.833375	5.30793	1.66729e-07	2.07504e-06	6.77497
APOL6	-0.651364	6.32177	-5.30696	1.67571e-07	2.08371e-06	6.77015
FCGR2A	-0.680145	4.47698	-5.30684	1.6767e-07	2.08371e-06	6.76959
GALNT6	-0.872031	5.82022	-5.3055	1.68843e-07	2.09676e-06	6.76292
CTC-559E9.6	0.561568	-1.21633	5.30482	1.69444e-07	2.10269e-06	6.75952
ACKR1	1.24306	1.97302	5.30429	1.69911e-07	2.10632e-06	6.75688
UNG	0.386982	5.72047	5.3042	1.69984e-07	2.10632e-06	6.75647
SPECC1	-0.478757	5.00503	-5.30395	1.70205e-07	2.10677e-06	6.75523
AP001062.7	0.650204	0.0262341	5.30376	1.70372e-07	2.10677e-06	6.75429
VARS2	0.352616	4.88201	5.30374	1.70392e-07	2.10677e-06	6.75418
CEP68	0.437359	4.49325	5.30258	1.71422e-07	2.11798e-06	6.74841
TLR10	0.959136	-0.59245	5.30239	1.71587e-07	2.11848e-06	6.74749
LINC00324	0.561027	0.858034	5.29993	1.73797e-07	2.14421e-06	6.73525
RLTPR	0.723295	1.18349	5.29971	1.7399e-07	2.14504e-06	6.73419
SLC9B1	0.532974	-1.62778	5.2995	1.74182e-07	2.14585e-06	6.73313
ANKRD36C	0.801695	0.0609075	5.29774	1.75777e-07	2.16394e-06	6.72441
HEXIM2	0.445486	0.497063	5.29755	1.75951e-07	2.16451e-06	6.72347
DYRK1B	0.652857	3.62778	5.29739	1.76101e-07	2.16479e-06	6.72265
TRAPPC6A	0.61276	3.26022	5.29587	1.77492e-07	2.18032e-06	6.71513
ZNF771	0.55273	1.30377	5.29459	1.78674e-07	2.19327e-06	6.70877
RP11-568N6.1	0.621037	-0.319333	5.29339	1.79785e-07	2.20523e-06	6.70285
GUSBP11	0.732171	-1.25799	5.29326	1.79908e-07	2.20523e-06	6.70219
COA3	0.366415	5.45945	5.29218	1.80916e-07	2.21576e-06	6.69684
DPY19L2P2	0.902737	-1.05988	5.29206	1.81027e-07	2.21576e-06	6.69626
COQ10A	0.46215	2.07178	5.29127	1.81768e-07	2.22324e-06	6.69235
CLASRP	0.376269	4.65853	5.29085	1.82167e-07	2.22651e-06	6.69025
UNC13A	0.939364	-1.3251	5.29028	1.8271e-07	2.23156e-06	6.6874
ZNF764	0.323159	2.65227	5.29008	1.82895e-07	2.23182e-06	6.68644
SLC7A5	-0.693643	8.97876	-5.28992	1.83051e-07	2.23182e-06	6.68562
DDX58	-0.678199	5.39191	-5.28984	1.83125e-07	2.23182e-06	6.68523
PARP12	-0.413482	6.10841	-5.28809	1.84789e-07	2.24944e-06	6.67658
CYP2R1	0.68888	2.61175	5.28804	1.84835e-07	2.24944e-06	6.67635
U91328.19	0.724591	0.666689	5.28765	1.85208e-07	2.25237e-06	6.67441
CTD-3222D19.8	0.653088	-1.48006	5.2866	1.86222e-07	2.26309e-06	6.66919
RP5-827C21.4	0.752131	-0.558116	5.28561	1.87181e-07	2.27312e-06	6.66428
PTPRS	0.751864	5.65439	5.28401	1.88729e-07	2.29029e-06	6.6564
KCTD13	0.452987	3.42269	5.28298	1.89738e-07	2.30089e-06	6.6513
BDKRB2	-0.56865	4.93718	-5.28263	1.90083e-07	2.30344e-06	6.64956
TPBG	-0.418453	6.3517	-5.27807	1.94625e-07	2.3568e-06	6.62697
RP11-452F19.3	0.63795	0.880537	5.27779	1.94899e-07	2.35831e-06	6.62563
POMC	1.2824	-0.388542	5.27767	1.95026e-07	2.35831e-06	6.625
RFX1	0.293202	4.07866	5.27722	1.95475e-07	2.36206e-06	6.62281
RP11-549B18.1	0.84648	-1.6177	5.27537	1.97359e-07	2.38148e-06	6.61363
CASP7	-0.376813	5.4249	-5.27536	1.97362e-07	2.38148e-06	6.61362
HADH	0.387963	5.2207	5.27502	1.97716e-07	2.38406e-06	6.6119
USP15	-0.289548	5.8887	-5.27445	1.98295e-07	2.38936e-06	6.60911
RAB11B	0.272242	6.46766	5.27364	1.99129e-07	2.39771e-06	6.60509
SHC1	-0.378406	7.38698	-5.27252	2.00279e-07	2.40985e-06	6.59959
PWAR6	1.01638	-1.22909	5.27162	2.01216e-07	2.41942e-06	6.59512
LPIN1	0.518627	4.14364	5.27122	2.01626e-07	2.42264e-06	6.59317
ICOSLG	0.675627	-0.823106	5.27088	2.01989e-07	2.42529e-06	6.59145
CH17-189H20.1	-0.63031	-0.0269472	-5.26947	2.03462e-07	2.44125e-06	6.58451
CDKN1A	-0.445148	8.23095	-5.26802	2.04993e-07	2.4579e-06	6.57733
NDRG2	0.699497	5.67632	5.26597	2.07167e-07	2.48222e-06	6.56724
CROCCP3	0.598856	-0.0269446	5.26561	2.07557e-07	2.48514e-06	6.56545
MXD3	0.620958	2.55968	5.2632	2.1015e-07	2.51442e-06	6.55357
LRRC37A4P	1.06228	0.0105847	5.26208	2.1136e-07	2.52713e-06	6.54808
RP11-465N4.5	0.76785	-1.08934	5.26108	2.12461e-07	2.5385e-06	6.54311
IKZF3	0.962273	2.99742	5.25962	2.14066e-07	2.55478e-06	6.53592
CTD-2517M22.14	0.779399	-0.586469	5.25948	2.14215e-07	2.55478e-06	6.53525
RP11-486O12.2	0.521683	0.0411681	5.25943	2.14273e-07	2.55478e-06	6.53499
RCCD1	0.428548	3.71037	5.25853	2.15268e-07	2.56485e-06	6.53056
RP11-465B22.8	1.01091	0.261379	5.25732	2.16611e-07	2.57904e-06	6.52462
DNAJB9	0.373018	4.61088	5.25658	2.17444e-07	2.58716e-06	6.52094
ALDH1L1	1.46379	0.796195	5.25642	2.17625e-07	2.58751e-06	6.52015
GOLGA7B	-1.13616	4.07932	-5.25596	2.18139e-07	2.59181e-06	6.51789
CPAMD8	0.69491	0.942883	5.25556	2.18588e-07	2.59534e-06	6.51592
MLLT6	0.431027	6.49849	5.25518	2.19015e-07	2.59859e-06	6.51406
KEAP1	0.328888	6.66397	5.2531	2.21374e-07	2.62475e-06	6.50382
SRRT	0.265697	6.72777	5.25237	2.22207e-07	2.6328e-06	6.50022
WBP1	0.437449	2.74799	5.25176	2.22908e-07	2.63927e-06	6.49721
PI4K2A	-0.289208	5.57664	-5.25159	2.23107e-07	2.63979e-06	6.49636
MIF-AS1	0.709654	-0.786361	5.25005	2.24875e-07	2.65886e-06	6.48881
SLC18B1	0.432095	3.71732	5.24786	2.27421e-07	2.6871e-06	6.47805
WDR60	0.392209	3.23785	5.24523	2.30522e-07	2.72185e-06	6.4651
RP11-296O14.3	0.540831	-0.906971	5.24402	2.31965e-07	2.73699e-06	6.45913
GYG1	-0.377098	5.63057	-5.24328	2.32844e-07	2.74547e-06	6.45551
LIG1	0.450541	5.43854	5.24207	2.34295e-07	2.76066e-06	6.44957
SLC25A21-AS1	0.934004	-1.52328	5.24158	2.34889e-07	2.76428e-06	6.44715
C1GALT1	-0.368048	4.70465	-5.24155	2.34926e-07	2.76428e-06	6.447
IGSF10	1.43899	-0.157296	5.2414	2.35101e-07	2.76442e-06	6.44629
IGSF9B	1.14773	-0.717695	5.24118	2.35375e-07	2.76574e-06	6.44518
AHNAK2	-0.831245	8.31838	-5.24047	2.36227e-07	2.77384e-06	6.44172
CYP4B1	1.68813	0.0174265	5.23836	2.3881e-07	2.80141e-06	6.43132
RASGRP2	0.65924	1.14744	5.23828	2.38904e-07	2.80141e-06	6.43095
C19orf44	0.411297	2.04789	5.23623	2.4143e-07	2.82906e-06	6.42089
LARGE	0.74086	3.37522	5.2361	2.41595e-07	2.82906e-06	6.42024
STK17A	-0.425354	6.10798	-5.23532	2.42561e-07	2.83843e-06	6.41643
ABO	1.48657	2.35336	5.23433	2.43795e-07	2.85091e-06	6.41158
MAPK8IP2	0.971665	2.50352	5.23414	2.44032e-07	2.85173e-06	6.41065
FAM174B	0.612844	2.35647	5.23386	2.44392e-07	2.85227e-06	6.40924
SULT1B1	1.2389	-0.556618	5.23384	2.44413e-07	2.85227e-06	6.40915
RP11-147L13.15	0.522097	0.46221	5.23368	2.44615e-07	2.85266e-06	6.40837
SLC25A10	0.398184	-0.636295	5.23286	2.45639e-07	2.86266e-06	6.40437
RP11-517B11.7	0.488965	0.859201	5.23227	2.46383e-07	2.86936e-06	6.40148
KLK5	-2.04986	4.50496	-5.23198	2.46756e-07	2.87175e-06	6.40003
QTRT1	0.412064	4.79069	5.22934	2.50117e-07	2.90887e-06	6.3871
ALKBH6	0.577504	0.733609	5.22835	2.51398e-07	2.92177e-06	6.38222
CDH24	0.475914	3.71312	5.22776	2.52155e-07	2.92858e-06	6.37934
KLRG2	1.03438	2.00111	5.22729	2.52766e-07	2.93249e-06	6.37703
ANKAR	0.473118	-0.0641779	5.22723	2.52836e-07	2.93249e-06	6.37676
PMEPA1	-0.714526	6.74098	-5.22541	2.55209e-07	2.95799e-06	6.36783
REM1	0.793419	-0.742714	5.22521	2.55476e-07	2.95907e-06	6.36684
APLN	-0.759348	3.01894	-5.2232	2.58115e-07	2.98761e-06	6.35701
HLA-B	-0.597958	10.9879	-5.2219	2.59846e-07	3.00561e-06	6.35062
AC074286.1	0.803347	1.78305	5.22084	2.61262e-07	3.01993e-06	6.34543
KDM2B	0.316592	5.16504	5.22017	2.62152e-07	3.02816e-06	6.34218
RP1-191J18.66	-0.460657	0.11232	-5.21927	2.63371e-07	3.04018e-06	6.33774
PPP1R14C	-0.726135	5.87933	-5.21801	2.6507e-07	3.05772e-06	6.3316
NYNRIN	0.839263	4.21268	5.21651	2.6712e-07	3.07929e-06	6.32423
HAUS4	0.379744	4.06544	5.21585	2.68018e-07	3.08755e-06	6.32103
XAF1	-0.908415	3.64074	-5.2143	2.70155e-07	3.11007e-06	6.31343
EFHC1	0.505403	2.71565	5.21373	2.70946e-07	3.11706e-06	6.31064
GDPGP1	0.458741	1.71527	5.21231	2.72917e-07	3.13762e-06	6.30371
OSTM1	-0.360044	5.09195	-5.21079	2.75047e-07	3.15998e-06	6.29628
SLC38A2	-0.433956	8.86664	-5.20951	2.76847e-07	3.17851e-06	6.29005
UNC5CL	0.778272	-0.28703	5.20748	2.79733e-07	3.20949e-06	6.28013
SYNC	-0.84917	1.15077	-5.20731	2.79982e-07	3.21018e-06	6.27928
EGFL8	0.737996	-0.93632	5.20705	2.80359e-07	3.21234e-06	6.278
B4GALNT4	1.28114	1.6611	5.20558	2.82465e-07	3.2343e-06	6.27085
IFI35	-0.61214	5.59462	-5.20379	2.85069e-07	3.26193e-06	6.26208
PLSCR1	-0.48072	6.4341	-5.20283	2.86467e-07	3.27572e-06	6.2574
FGFR2	0.725245	5.04448	5.20199	2.87699e-07	3.2876e-06	6.2533
HEIH	0.348734	3.77078	5.19925	2.91748e-07	3.33163e-06	6.23995
DAPL1	1.68957	2.34727	5.19883	2.92372e-07	3.33653e-06	6.2379
AP001469.9	0.614493	-0.160447	5.19843	2.92974e-07	3.34116e-06	6.23594
DNAJC4	0.375567	4.39697	5.1975	2.94365e-07	3.35478e-06	6.23141
RP1-101A2.1	0.48142	-1.31689	5.19691	2.95246e-07	3.36257e-06	6.22855
ASTE1	0.426054	2.96441	5.19621	2.96304e-07	3.37237e-06	6.22514
ZNF891	0.522229	1.17048	5.19549	2.97402e-07	3.3826e-06	6.2216
STON2	-0.555414	5.78907	-5.19535	2.97611e-07	3.38272e-06	6.22093
PPM1D	0.376366	3.51311	5.19434	2.99156e-07	3.39801e-06	6.21598
CD59	-0.416502	8.64856	-5.19409	2.99528e-07	3.39801e-06	6.2148
FUT10	0.465264	2.24108	5.19407	2.99555e-07	3.39801e-06	6.21471
U2AF1L4	0.472379	2.20562	5.19291	3.01341e-07	3.416e-06	6.20903
TMEM132B	0.92449	-0.0530769	5.19243	3.02072e-07	3.42201e-06	6.20671
CALML4	0.62945	0.926626	5.19221	3.02425e-07	3.42373e-06	6.2056
HES6	0.747302	2.38125	5.19185	3.02965e-07	3.42757e-06	6.20389
TPRN	0.442069	4.10878	5.18997	3.0589e-07	3.45837e-06	6.19471
TBL1X	0.634947	4.83267	5.18891	3.0755e-07	3.47483e-06	6.18954
TFF3	1.45369	-0.00932678	5.1874	3.09916e-07	3.49924e-06	6.18222
APOO	0.382468	3.36903	5.18638	3.11537e-07	3.51521e-06	6.17723
KIRREL	-0.639682	5.9465	-5.18442	3.14663e-07	3.54813e-06	6.16769
ANKS3	0.46216	3.12807	5.18383	3.15605e-07	3.5564e-06	6.16484
TIMM44	0.319957	5.19183	5.18222	3.18199e-07	3.58265e-06	6.15702
KCND1	0.693311	0.780198	5.18213	3.18355e-07	3.58265e-06	6.15655
DFNB59	0.737337	-1.00543	5.18045	3.21082e-07	3.61095e-06	6.1484
PRADC1	0.390739	3.63414	5.17987	3.22037e-07	3.61931e-06	6.14556
ALKBH2	0.434633	3.63247	5.1793	3.22976e-07	3.62746e-06	6.14278
TRIM45	0.601703	1.68982	5.17864	3.24059e-07	3.63724e-06	6.13958
ZNF446	0.369278	2.64586	5.17849	3.24304e-07	3.63758e-06	6.13886
PBX4	0.681938	0.459311	5.1762	3.28106e-07	3.67781e-06	6.12773
JAG1	-0.508999	8.2733	-5.17532	3.29581e-07	3.69191e-06	6.12344
KRT16P4	-1.23225	0.155644	-5.17466	3.30684e-07	3.70183e-06	6.12025
COL17A1	-1.07849	9.66498	-5.17408	3.31665e-07	3.71038e-06	6.11742
PHOSPHO2	0.50184	0.165246	5.17219	3.3486e-07	3.74366e-06	6.10826
SIX2	1.09509	1.68699	5.17077	3.37277e-07	3.76822e-06	6.10139
IGFL2	-1.42252	1.6979	-5.17003	3.38551e-07	3.77997e-06	6.09779
AC114271.2	0.433699	-0.469802	5.1698	3.38948e-07	3.78192e-06	6.09667
IL18	-0.75671	4.72203	-5.16898	3.40366e-07	3.7937e-06	6.09268
COX5A	0.330039	6.19162	5.16893	3.40449e-07	3.7937e-06	6.09245
RP11-146F11.1	0.50477	-1.09308	5.16816	3.41784e-07	3.80609e-06	6.08871
DKK3	-0.687526	6.51514	-5.16679	3.44179e-07	3.83025e-06	6.08204
CYP27B1	-0.816377	2.8563	-5.16645	3.4477e-07	3.8326e-06	6.0804
RNF152	-0.674275	4.99558	-5.16641	3.4484e-07	3.8326e-06	6.08021
ZBTB12	0.632169	1.70358	5.16441	3.4836e-07	3.86921e-06	6.0705
HOXB4	1.16928	-0.291937	5.16418	3.4876e-07	3.87112e-06	6.06941
EMID1	1.03424	1.13519	5.16356	3.49858e-07	3.8799e-06	6.06641
GPD1L	0.568919	3.69343	5.16348	3.50006e-07	3.8799e-06	6.066
TADA1	0.363798	3.3397	5.16258	3.51597e-07	3.89308e-06	6.06167
MYEF2	0.987951	-0.222992	5.16255	3.51652e-07	3.89308e-06	6.06152
IER3IP1	0.220566	-0.365133	5.16009	3.56079e-07	3.93953e-06	6.04957
LNP1	0.553006	0.808867	5.15981	3.56584e-07	3.94256e-06	6.04821
CASP14	-2.23705	2.95479	-5.15663	3.62378e-07	4.00402e-06	6.03282
CD200	0.856221	2.27035	5.15458	3.6616e-07	4.04292e-06	6.0229
VNN2	0.965095	0.0869815	5.15447	3.66373e-07	4.04292e-06	6.02235
ANKRD65	0.867187	3.4645	5.15361	3.67962e-07	4.05782e-06	6.01822
KIT	0.914811	1.90395	5.15341	3.68343e-07	4.05939e-06	6.01723
CBFA2T3	0.719054	2.17902	5.15047	3.73868e-07	4.11762e-06	6.00301
ARHGAP19	0.402054	3.60834	5.15017	3.7444e-07	4.11762e-06	6.00155
FAM212B	0.455794	3.31827	5.1501	3.74569e-07	4.11762e-06	6.00122
LIPE-AS1	0.703723	0.826835	5.15009	3.74592e-07	4.11762e-06	6.00116
FZD8	0.752008	2.44355	5.14976	3.75202e-07	4.12166e-06	5.99961
ALDOC	0.779984	4.6746	5.14916	3.7636e-07	4.13171e-06	5.99666
WBSCR27	0.984161	-0.0115775	5.14711	3.80286e-07	4.16901e-06	5.98675
SLC25A6	0.233086	1.43611	5.14706	3.80383e-07	4.16901e-06	5.98651
FANCL	0.453629	3.57496	5.147	3.80491e-07	4.16901e-06	5.98624
CEBPA-AS1	0.602919	0.41543	5.14673	3.81014e-07	4.17205e-06	5.98493
JMJD7-PLA2G4B	0.762688	1.62962	5.14602	3.82388e-07	4.18441e-06	5.98149
NEK5	0.489374	-1.46623	5.14488	3.84594e-07	4.20585e-06	5.97599
RNF217	-0.449957	5.24073	-5.14451	3.85309e-07	4.20887e-06	5.97422
ISOC1	0.40584	3.81281	5.14448	3.85365e-07	4.20887e-06	5.97408
CPEB1	1.0655	-1.17964	5.14409	3.8614e-07	4.21464e-06	5.97216
CITF22-1A6.3	0.415319	-1.20403	5.1427	3.88851e-07	4.24152e-06	5.96548
SALL2	1.01843	1.28236	5.14214	3.89958e-07	4.25087e-06	5.96277
MZF1	0.450015	3.21241	5.14139	3.91435e-07	4.26424e-06	5.95916
KCNJ14	0.572731	0.819896	5.13838	3.97447e-07	4.32696e-06	5.9446
AC093495.4	0.568609	-1.01823	5.13814	3.97919e-07	4.32933e-06	5.94347
PPM1N	0.629227	0.519471	5.13719	3.99839e-07	4.34745e-06	5.93887
RPS6KA4	-0.374544	6.72602	-5.13548	4.03315e-07	4.38245e-06	5.93061
GSR	0.68052	6.02291	5.1349	4.0449e-07	4.39242e-06	5.92783
CA11	0.642961	2.72538	5.13263	4.09162e-07	4.44032e-06	5.91686
TTYH1	0.793009	-0.687454	5.13219	4.10069e-07	4.44733e-06	5.91475
C1R	-0.515653	8.14155	-5.13104	4.1245e-07	4.47031e-06	5.90922
SDHAP1	0.557721	2.58883	5.13091	4.12722e-07	4.47041e-06	5.90859
NABP1	-0.494433	4.95215	-5.12999	4.14639e-07	4.48832e-06	5.90417
AC142472.6	0.561263	-0.630701	5.12953	4.15611e-07	4.49598e-06	5.90193
LTBP4	0.538892	6.5195	5.12814	4.18531e-07	4.5247e-06	5.89524
PLA2G3	1.61084	1.59118	5.12683	4.21316e-07	4.55143e-06	5.88891
PTOV1-AS2	0.670682	0.282533	5.12672	4.21537e-07	4.55143e-06	5.88841
ZNF557	0.351562	2.66375	5.12542	4.24329e-07	4.57867e-06	5.88211
KIAA1328	0.389485	1.9986	5.12523	4.2472e-07	4.57999e-06	5.88123
ZNF337-AS1	0.601353	-0.0244248	5.12478	4.257e-07	4.58765e-06	5.87903
SLC22A17	0.72776	2.6422	5.12314	4.29221e-07	4.62267e-06	5.87116
SYK	0.539119	5.87163	5.12279	4.29995e-07	4.62809e-06	5.86944
TIFA	0.447779	3.71515	5.12202	4.31662e-07	4.64285e-06	5.86575
RP11-529E10.6	0.597816	-0.995924	5.1219	4.31912e-07	4.64285e-06	5.8652
CBX8	0.407794	2.93433	5.12176	4.32221e-07	4.64324e-06	5.86452
BRICD5	0.808292	0.15935	5.12157	4.32643e-07	4.64485e-06	5.86358
TMED7-TICAM2	-0.605354	-1.5868	-5.12121	4.3343e-07	4.648e-06	5.86185
D2HGDH	0.468732	3.80748	5.12118	4.33482e-07	4.648e-06	5.86173
TMEM180	0.467647	2.79999	5.12084	4.34238e-07	4.65317e-06	5.86007
TEX29	-0.899094	-1.39442	-5.1189	4.38489e-07	4.69577e-06	5.85077
DACT2	1.54707	0.908516	5.11813	4.40212e-07	4.70793e-06	5.84702
ZNF791	0.293815	4.30009	5.11811	4.40243e-07	4.70793e-06	5.84696
AC074212.5	0.499318	-1.01718	5.11802	4.40453e-07	4.70793e-06	5.8465
RP4-635E18.8	0.670493	-0.555407	5.11745	4.41703e-07	4.71833e-06	5.8438
LIME1	0.605322	0.307902	5.11576	4.45482e-07	4.75404e-06	5.83566
AC004447.2	0.499209	2.3653	5.11565	4.45725e-07	4.75404e-06	5.83514
RAD51C	0.396212	3.52658	5.11539	4.46309e-07	4.75404e-06	5.83389
UPP1	-0.693104	6.39036	-5.11535	4.46416e-07	4.75404e-06	5.83366
TAB1	0.269657	4.84661	5.11534	4.46441e-07	4.75404e-06	5.83361
TNS4	-0.716891	8.14147	-5.11484	4.47559e-07	4.76296e-06	5.83122
ELF3	1.04585	6.14423	5.11418	4.49038e-07	4.77572e-06	5.82807
RAMP2	0.521999	2.59949	5.113	4.51717e-07	4.80122e-06	5.8224
PCSK4	0.843495	0.0195224	5.11261	4.52612e-07	4.80774e-06	5.82051
PARD6G-AS1	0.565178	-0.295457	5.11239	4.53105e-07	4.80997e-06	5.81947
PDZD4	0.83785	0.920207	5.11198	4.54044e-07	4.81523e-06	5.81749
TRAF3IP2-AS1	0.467296	-0.0474859	5.11185	4.54351e-07	4.81523e-06	5.81685
TM7SF2	0.793255	3.66589	5.1118	4.54448e-07	4.81523e-06	5.81664
AC005076.5	0.652195	-1.56593	5.10994	4.58728e-07	4.85755e-06	5.80769
COL5A3	-0.714395	5.97563	-5.10784	4.63599e-07	4.90609e-06	5.79761
CFAP70	0.678562	-0.782708	5.10744	4.64525e-07	4.91283e-06	5.79571
DOC2B	1.02586	4.44039	5.10725	4.64981e-07	4.91461e-06	5.79477
ZNF837	0.566219	0.452616	5.10683	4.65961e-07	4.92064e-06	5.79276
HMGN5	0.81073	1.22344	5.10676	4.66129e-07	4.92064e-06	5.79241
INSR	0.474199	5.06374	5.10518	4.69849e-07	4.95683e-06	5.78483
FLVCR1	0.548797	3.17917	5.10175	4.78006e-07	5.03977e-06	5.7684
CTD-2562J17.6	0.59622	1.97435	5.10134	4.78994e-07	5.04492e-06	5.76643
ABCA2	0.675022	4.52525	5.1013	4.79087e-07	5.04492e-06	5.76624
CAMK2D	-0.397198	5.77255	-5.09982	4.82665e-07	5.07918e-06	5.75914
LY6G5C	0.478563	-0.0369551	5.09971	4.82937e-07	5.07918e-06	5.7586
RP11-600F24.7	0.592664	-0.395124	5.09958	4.8325e-07	5.07934e-06	5.75798
FAM104B	0.364753	3.04358	5.09887	4.8498e-07	5.09438e-06	5.75457
ADCY6	0.644417	3.74704	5.09802	4.87058e-07	5.11305e-06	5.75049
ZNF527	0.511411	1.23917	5.09692	4.8975e-07	5.13815e-06	5.74523
TUBB3	-0.50553	-1.62244	-5.09648	4.90832e-07	5.14633e-06	5.74313
CYP2E1	1.2493	0.37305	5.09595	4.92152e-07	5.157e-06	5.74056
RP1-43E13.2	0.557419	-1.97297	5.09537	4.93584e-07	5.16581e-06	5.73779
PHF8	0.488109	4.87868	5.09532	4.93703e-07	5.16581e-06	5.73756
SLC25A33	0.45501	2.78373	5.09524	4.93902e-07	5.16581e-06	5.73717
ZNF181	0.422376	2.10061	5.09425	4.96361e-07	5.18834e-06	5.73243
JTB	0.323422	6.49711	5.09399	4.96999e-07	5.18879e-06	5.73121
OSR1	0.996105	0.123801	5.09399	4.97013e-07	5.18879e-06	5.73118
CTC-231O11.1	0.902769	-0.917857	5.09232	5.01179e-07	5.22542e-06	5.72322
HIRIP3	0.379295	4.11545	5.09232	5.01198e-07	5.22542e-06	5.72318
QARS	0.252039	7.1181	5.09222	5.01442e-07	5.22542e-06	5.72272
FAM227A	0.808648	-0.865045	5.09199	5.02012e-07	5.22817e-06	5.72163
FGF12	1.07782	0.192944	5.09092	5.04718e-07	5.25314e-06	5.7165
CENPM	0.553459	3.57721	5.09074	5.05164e-07	5.25457e-06	5.71566
ZC3H6	0.490606	2.59452	5.08946	5.08416e-07	5.28517e-06	5.70953
WASH3P	0.395006	2.09124	5.08915	5.09214e-07	5.29024e-06	5.70804
PHYKPL	0.330465	3.94856	5.0889	5.0985e-07	5.29145e-06	5.70685
ZNF589	0.497254	3.16214	5.08886	5.09952e-07	5.29145e-06	5.70665
ANXA5	-0.347472	7.9932	-5.08866	5.10479e-07	5.2937e-06	5.70567
UBE2Q2	-0.361132	5.64865	-5.08728	5.14023e-07	5.32721e-06	5.69907
AGFG2	0.414409	3.94647	5.08681	5.15219e-07	5.33635e-06	5.69685
ANXA2P2	-0.434754	3.82558	-5.08655	5.15894e-07	5.3401e-06	5.6956
SGMS2	-0.538807	4.56086	-5.08436	5.21585e-07	5.39573e-06	5.68513
C19orf54	0.380667	3.60145	5.08324	5.24512e-07	5.42272e-06	5.67979
BTN3A3	-0.566402	4.52323	-5.08116	5.30002e-07	5.47615e-06	5.66985
TOP2B	0.368945	6.43638	5.07887	5.36116e-07	5.53596e-06	5.65891
RP11-150O12.1	-0.922391	2.46916	-5.07805	5.38335e-07	5.55551e-06	5.65497
SCNN1B	1.3239	2.66856	5.07766	5.39395e-07	5.56308e-06	5.65309
HKR1	0.507109	3.63677	5.07463	5.4761e-07	5.6444e-06	5.63867
LUC7L3	0.366637	5.93069	5.0737	5.50162e-07	5.66727e-06	5.63423
MEPCE	0.343987	5.96222	5.07314	5.51725e-07	5.67994e-06	5.63152
RP11-793H13.11	0.612543	-0.875099	5.07297	5.52182e-07	5.68121e-06	5.63073
RTP4	-0.777213	3.29529	-5.07226	5.54144e-07	5.69772e-06	5.62735
POMT1	0.392449	4.08354	5.07215	5.54456e-07	5.69772e-06	5.62681
ACTR1A	-0.225699	7.19672	-5.07133	5.5673e-07	5.71764e-06	5.62291
SNAPC5	0.375357	3.6405	5.07091	5.5789e-07	5.7261e-06	5.62092
MAP2K6	0.752143	1.09225	5.07016	5.59998e-07	5.74428e-06	5.61732
RAB6B	0.987537	2.23378	5.06852	5.64598e-07	5.78782e-06	5.60952
ASH2L	0.383381	5.46127	5.06841	5.64922e-07	5.78782e-06	5.60897
LIMD2	0.571936	3.97526	5.0682	5.65511e-07	5.79037e-06	5.60798
LOXL1-AS1	0.713258	1.61867	5.0672	5.68343e-07	5.81588e-06	5.60321
CTB-55O6.12	0.384587	0.212724	5.0644	5.76347e-07	5.89424e-06	5.58987
CAP2	-0.752196	2.84724	-5.06358	5.78697e-07	5.91472e-06	5.58599
VDAC3	0.368933	6.18668	5.06343	5.79139e-07	5.91497e-06	5.58526
RP11-307C12.12	0.566413	-1.37726	5.06334	5.79416e-07	5.91497e-06	5.5848
CTC-786C10.1	-0.968183	-1.23902	-5.06203	5.83201e-07	5.95004e-06	5.57859
TSNARE1	0.454136	3.58757	5.06033	5.88173e-07	5.99719e-06	5.57049
MCPH1	0.318247	4.09459	5.05646	5.99652e-07	6.11057e-06	5.55205
KRTCAP3	1.12629	3.58433	5.05608	6.00787e-07	6.11848e-06	5.55025
H1FX	0.416554	6.90082	5.05584	6.01497e-07	6.12204e-06	5.54912
PLIN3	-0.375002	7.19811	-5.05508	6.03776e-07	6.14157e-06	5.54551
MBTD1	0.417634	3.68756	5.05419	6.06468e-07	6.16528e-06	5.54127
CTC1	0.325315	3.98652	5.05018	6.18689e-07	6.28576e-06	5.52224
NTF3	1.14041	-1.29459	5.0499	6.19574e-07	6.291e-06	5.52088
CTF1	0.788152	1.58665	5.04867	6.23385e-07	6.3241e-06	5.51503
DEPDC7	-0.560557	2.63312	-5.04861	6.23576e-07	6.3241e-06	5.51474
NOX5	-0.968789	-0.531745	-5.04787	6.25858e-07	6.34347e-06	5.51125
B9D2	0.405662	1.98899	5.0474	6.27328e-07	6.35459e-06	5.50901
CENPC	0.400445	3.79124	5.04683	6.29126e-07	6.36901e-06	5.50628
CXCR4	0.771742	4.63101	5.04618	6.31142e-07	6.38563e-06	5.50323
RP11-480A16.1	0.795123	-1.02895	5.04516	6.34375e-07	6.41453e-06	5.49836
HSPH1	-0.429828	7.55922	-5.04387	6.38441e-07	6.45182e-06	5.49226
CDKN2C	0.740243	3.80755	5.04351	6.39584e-07	6.45953e-06	5.49056
SPAG5-AS1	0.48824	-0.699364	5.04203	6.44305e-07	6.50336e-06	5.48354
ANAPC7	0.26452	5.73682	5.0419	6.44739e-07	6.50389e-06	5.4829
DNAH1	0.6021	1.54247	5.04038	6.49641e-07	6.54946e-06	5.47568
KIAA1456	1.02822	-0.445987	5.03699	6.60666e-07	6.65667e-06	5.45963
ZNF652	0.373048	4.51509	5.03638	6.62692e-07	6.67288e-06	5.45671
RP11-166P13.3	0.629663	-0.444093	5.03626	6.63058e-07	6.67288e-06	5.45618
ENOSF1	0.462711	4.36704	5.03464	6.68423e-07	6.7229e-06	5.44849
PAX6	0.836927	1.38836	5.03438	6.69299e-07	6.72774e-06	5.44725
CTC-425O23.5	0.654491	-1.06627	5.03282	6.74506e-07	6.77245e-06	5.43985
MMAB	0.392496	4.68919	5.03281	6.74542e-07	6.77245e-06	5.4398
NTRK2	1.64514	4.91587	5.03168	6.78338e-07	6.80655e-06	5.43445
PKN1	0.607112	5.43181	5.03082	6.81248e-07	6.83173e-06	5.43037
KAZALD1	0.661249	1.89389	5.02955	6.85538e-07	6.8707e-06	5.42438
MKS1	0.295962	3.55271	5.02808	6.90579e-07	6.91716e-06	5.4174
RAB40C	0.331917	5.21238	5.02589	6.98111e-07	6.9885e-06	5.40705
HSD17B7	0.387355	2.64268	5.02402	7.04606e-07	7.04937e-06	5.39822
RP11-102N12.3	0.543363	-0.758477	5.02387	7.05157e-07	7.05074e-06	5.39748
C17orf75	0.356851	3.82562	5.02286	7.08685e-07	7.08186e-06	5.39272
COL12A1	-0.823751	7.8797	-5.02113	7.14783e-07	7.13861e-06	5.38455
NUDT8	0.563916	3.54555	5.01997	7.18894e-07	7.17546e-06	5.37908
RNF150	1.11556	1.38108	5.01882	7.23028e-07	7.2125e-06	5.37361
ZNF780B	0.455426	2.46515	5.01844	7.24384e-07	7.22179e-06	5.37183
NBEA	1.03457	0.166729	5.01735	7.28307e-07	7.25667e-06	5.36668
ABCB1	0.751184	0.272247	5.01677	7.30419e-07	7.27345e-06	5.36392
SDR39U1	0.385831	2.15151	5.01623	7.32344e-07	7.28837e-06	5.36141
TMEM163	0.937914	-0.0443125	5.01567	7.34402e-07	7.30435e-06	5.35873
TPM1	-0.662703	6.75651	-5.01554	7.34865e-07	7.30435e-06	5.35813
DUSP8	0.575918	2.67525	5.01544	7.35236e-07	7.30435e-06	5.35765
AK8	0.901043	0.397568	5.01457	7.38403e-07	7.32975e-06	5.35355
PCLO	1.52579	1.16057	5.0145	7.38654e-07	7.32975e-06	5.35323
ATP6V0D1	-0.278617	6.89178	-5.01369	7.41622e-07	7.35283e-06	5.3494
RP11-399K21.14	0.722441	-1.65015	5.01363	7.41843e-07	7.35283e-06	5.34912
NCAPH2	0.372265	5.78912	5.01346	7.42457e-07	7.35464e-06	5.34833
ENAH	-0.46178	7.40619	-5.01207	7.47614e-07	7.40142e-06	5.34173
C15orf62	0.803512	1.57895	5.01163	7.49238e-07	7.41319e-06	5.33966
RBM33	0.290708	5.38824	5.01042	7.53735e-07	7.45336e-06	5.33396
MZF1-AS1	0.512351	0.160052	5.00961	7.56771e-07	7.47904e-06	5.33013
AGAP1	0.436206	4.56207	5.00925	7.58097e-07	7.4878e-06	5.32846
RP11-1149O23.3	0.508498	1.22379	5.0088	7.59811e-07	7.50039e-06	5.3263
AC025335.1	0.495755	2.69204	5.00853	7.60805e-07	7.50584e-06	5.32506
WTAPP1	-0.936351	-1.13666	-5.00824	7.61887e-07	7.51006e-06	5.3237
SPHK2	0.339409	3.37957	5.00818	7.62113e-07	7.51006e-06	5.32342
VILL	0.605585	2.45101	5.00716	7.65979e-07	7.54379e-06	5.3186
PATZ1	0.510264	4.43136	5.00539	7.72736e-07	7.60324e-06	5.31022
CEBPB-AS1	0.622778	-1.71191	5.00534	7.72908e-07	7.60324e-06	5.31001
UNK	0.283334	4.75587	5.00487	7.74707e-07	7.61654e-06	5.30779
RP11-108L7.15	0.645645	-1.56966	5.00429	7.76929e-07	7.63398e-06	5.30506
MCUR1	0.308765	5.134	5.00387	7.78529e-07	7.64529e-06	5.3031
RP11-527N22.2	-1.00723	0.239178	-5.00351	7.79927e-07	7.65461e-06	5.30139
DYSF	-0.642581	4.54937	-5.00339	7.80395e-07	7.65479e-06	5.30082
ABCA7	0.492365	4.20235	5.00291	7.82264e-07	7.66871e-06	5.29854
HSPB3	-1.60578	0.206955	-5.00232	7.84546e-07	7.68175e-06	5.29576
EPCAM	1.03744	5.04015	5.00223	7.84887e-07	7.68175e-06	5.29535
THEM6	0.483525	4.78213	5.00221	7.84947e-07	7.68175e-06	5.29528
FRY	0.803674	2.26166	5.00177	7.86653e-07	7.69403e-06	5.29321
TXNDC17	-0.450047	6.18917	-5.00155	7.87509e-07	7.69798e-06	5.29217
HOXB3	1.10682	1.65962	5.00122	7.88813e-07	7.70631e-06	5.29059
IL31RA	-1.00339	0.991648	-5.00095	7.8988e-07	7.71231e-06	5.2893
EPHA10	1.10048	-1.06548	5.00032	7.92315e-07	7.73165e-06	5.28637
ZNF230	0.386693	1.50716	4.9986	7.99096e-07	7.79336e-06	5.27825
ANO6	-0.409548	6.21382	-4.99807	8.01181e-07	7.80922e-06	5.27576
TOB1-AS1	0.580645	-1.02498	4.99556	8.11182e-07	7.90219e-06	5.26394
ICAM3	0.836664	0.366662	4.99538	8.11903e-07	7.90469e-06	5.26309
RP3-475N16.1	0.500649	0.0510374	4.99482	8.14151e-07	7.92204e-06	5.26046
RNF207	0.759531	2.1085	4.99405	8.17254e-07	7.94744e-06	5.25683
RP11-448A19.1	0.507144	0.17381	4.99394	8.17693e-07	7.94744e-06	5.25632
TIMM21	0.381648	3.80405	4.99377	8.1838e-07	7.94775e-06	5.25552
RP11-33E12.2	0.949567	-1.64871	4.9937	8.18659e-07	7.94775e-06	5.25519
RP11-332H14.2	0.52005	0.092434	4.99288	8.21971e-07	7.97537e-06	5.25134
STAR	1.02534	0.502826	4.99186	8.26104e-07	8.0109e-06	5.24656
PRR29	0.57728	-0.439842	4.9917	8.26762e-07	8.01272e-06	5.2458
CLN8	0.337102	4.09421	4.9913	8.284e-07	8.02403e-06	5.24392
KRT16P5	-1.26607	-0.116546	-4.99109	8.29253e-07	8.02773e-06	5.24294
ZNF3	0.361004	4.34705	4.98867	8.39201e-07	8.11942e-06	5.23157
CCDC106	0.590623	2.71443	4.98759	8.4369e-07	8.15822e-06	5.22649
SEMA6A	0.881513	3.12808	4.98647	8.48372e-07	8.19885e-06	5.22121
URAHP	0.767402	-1.37919	4.98595	8.50543e-07	8.21517e-06	5.21878
NECAB3	0.418714	3.72747	4.98552	8.52361e-07	8.2262e-06	5.21674
AC093838.4	0.482052	3.4251	4.98545	8.52651e-07	8.2262e-06	5.21642
TIGD7	0.636286	0.0895136	4.98491	8.54924e-07	8.24346e-06	5.21388
FGFBP3	0.73671	-0.786278	4.98474	8.55639e-07	8.24569e-06	5.21308
LINC01270	-0.599395	-1.05793	-4.98339	8.61355e-07	8.29608e-06	5.20674
WDR19	0.427502	3.05595	4.98323	8.62015e-07	8.29637e-06	5.20601
RP11-159D12.8	0.556699	2.03684	4.98299	8.63033e-07	8.29637e-06	5.20488
INPP5J	0.766852	1.47185	4.98286	8.63596e-07	8.29637e-06	5.20426
EIF3J-AS1	0.390318	1.59743	4.98282	8.63776e-07	8.29637e-06	5.20406
HLA-A	-0.507526	10.3796	-4.98281	8.6382e-07	8.29637e-06	5.20401
HRASLS	1.28463	-0.614079	4.98114	8.70953e-07	8.36017e-06	5.19618
EPHX1	0.645826	6.06187	4.98036	8.74288e-07	8.38745e-06	5.19253
CA12	-0.83362	7.44149	-4.9799	8.76267e-07	8.40171e-06	5.19038
APITD1-CORT	0.495235	-1.01713	4.97917	8.79414e-07	8.42714e-06	5.18696
ECH1	0.341595	6.49214	4.97832	8.83096e-07	8.45766e-06	5.18298
MAMDC4	0.820619	1.28088	4.97596	8.93439e-07	8.55192e-06	5.17189
SFN	-0.636491	11.2607	-4.97538	8.96005e-07	8.57167e-06	5.16915
SLC25A4	0.672156	4.03422	4.97508	8.97286e-07	8.5791e-06	5.16779
PRR19	0.55512	0.81599	4.97429	9.00793e-07	8.6072e-06	5.16407
CNIH2	0.780774	0.259574	4.97419	9.01235e-07	8.6072e-06	5.16361
L3MBTL1	0.734294	1.07511	4.9738	9.02987e-07	8.6191e-06	5.16176
CTD-2124B8.2	0.564479	-0.41113	4.97344	9.04576e-07	8.62943e-06	5.16008
TGFA	-0.612848	5.99315	-4.97332	9.05117e-07	8.62976e-06	5.15951
USP6	0.735646	-1.48409	4.97264	9.08127e-07	8.65362e-06	5.15635
NSUN5P2	0.607138	-0.552426	4.97087	9.16082e-07	8.72454e-06	5.14804
ABHD12	0.322205	5.75288	4.97016	9.19298e-07	8.75028e-06	5.1447
NNMT	-0.832408	5.60954	-4.96937	9.22868e-07	8.77935e-06	5.141
PTPLA	-0.5748	1.66176	-4.96846	9.26986e-07	8.81361e-06	5.13676
RAI2	0.844556	1.24531	4.96618	9.37425e-07	8.90789e-06	5.12609
RP5-1112D6.8	0.451877	-0.487101	4.96578	9.393e-07	8.92073e-06	5.12419
KANK4	-1.43314	0.969872	-4.96562	9.40001e-07	8.92242e-06	5.12348
COL4A6	-1.25769	4.26973	-4.96541	9.4097e-07	8.92664e-06	5.12249
ARMC7	0.327637	3.89066	4.96491	9.43302e-07	8.94378e-06	5.12014
CEP250	0.391529	5.32582	4.96177	9.57969e-07	9.07779e-06	5.10544
PART1	1.3426	-0.061537	4.96003	9.66168e-07	9.1504e-06	5.09732
MYOF	-0.504188	7.7681	-4.95948	9.68797e-07	9.1702e-06	5.09473
RP5-1014D13.2	0.396474	0.611683	4.95819	9.74907e-07	9.22292e-06	5.08874
POU6F1	0.562962	1.67952	4.95805	9.75585e-07	9.22421e-06	5.08808
JMY	0.397071	4.5563	4.95757	9.77901e-07	9.23834e-06	5.08582
CA5B	0.426851	2.24529	4.95751	9.78165e-07	9.23834e-06	5.08556
FAAH2	0.699292	2.08494	4.95573	9.86778e-07	9.31452e-06	5.07721
TARBP1	0.439686	4.75217	4.95531	9.88783e-07	9.32828e-06	5.07527
LDOC1	1.046	2.54472	4.95194	1.00526e-06	9.47615e-06	5.05953
PRR4	1.19485	-0.920871	4.95188	1.00557e-06	9.47615e-06	5.05924
CYFIP2	0.698852	3.29057	4.95156	1.00716e-06	9.48594e-06	5.05773
ZNF774	0.54938	0.791522	4.95131	1.00838e-06	9.49053e-06	5.05658
CEND1	0.75762	-1.65755	4.95123	1.00877e-06	9.49053e-06	5.05621
LGI3	1.39884	0.604559	4.95106	1.00961e-06	9.49319e-06	5.05542
CD180	0.758688	1.1399	4.95034	1.01317e-06	9.52145e-06	5.05206
TBC1D17	0.315998	5.07188	4.95012	1.01427e-06	9.52651e-06	5.05103
DEPDC5	0.320357	3.75292	4.94987	1.01552e-06	9.53305e-06	5.04985
ING4	0.426563	4.2114	4.94934	1.01815e-06	9.5524e-06	5.0474
TSPAN32	0.793354	-1.09699	4.94921	1.0188e-06	9.55332e-06	5.04678
PAQR5	-0.928267	3.67357	-4.94735	1.02814e-06	9.6356e-06	5.03809
MTMR4	0.378189	5.07163	4.94449	1.04264e-06	9.76606e-06	5.02475
TYMP	-0.600495	8.47109	-4.94368	1.04675e-06	9.79915e-06	5.02101
LRRC8C	-0.494122	4.8079	-4.94353	1.04754e-06	9.80116e-06	5.02029
FAM24B	0.823781	-0.41911	4.94331	1.04867e-06	9.80635e-06	5.01926
PPFIA3	0.469667	4.40666	4.94268	1.05188e-06	9.83102e-06	5.01635
SKAP1	0.824009	1.0391	4.94242	1.05321e-06	9.83805e-06	5.01514
SDHAP3	0.711884	0.467455	4.94206	1.0551e-06	9.85025e-06	5.01344
DYM	0.301202	5.04292	4.94179	1.05648e-06	9.85776e-06	5.01219
KIAA1211	0.979087	-0.491994	4.94086	1.06129e-06	9.89565e-06	5.00786
CCDC183	0.530625	-1.19143	4.94078	1.0617e-06	9.89565e-06	5.0075
C5orf66	0.624154	0.465389	4.94	1.06576e-06	9.92805e-06	5.00386
B4GALT4	0.59966	5.07795	4.93918	1.07007e-06	9.96272e-06	5.00002
RP11-22C11.2	0.73667	-0.13751	4.93891	1.07145e-06	9.97021e-06	4.99878
MIR99AHG	0.994655	-0.169903	4.93805	1.07599e-06	1.00069e-05	4.99476
RP11-317J10.2	-0.746817	-1.21318	-4.936	1.0868e-06	1.0102e-05	4.98524
WDPCP	0.448954	1.72248	4.93562	1.08882e-06	1.01152e-05	4.98347
DCAF11	0.276224	5.96938	4.93475	1.09347e-06	1.01529e-05	4.97942
PDE3B	0.831067	1.93991	4.9336	1.09964e-06	1.02046e-05	4.97406
PSPN	0.383932	1.39888	4.93322	1.10169e-06	1.0218e-05	4.97228
BZRAP1-AS1	0.736096	-1.43193	4.93267	1.10463e-06	1.02398e-05	4.96974
C8orf4	0.930915	3.08826	4.93001	1.11911e-06	1.03684e-05	4.95734
C15orf61	0.361076	2.32426	4.92971	1.1207e-06	1.03775e-05	4.95599
SERPINB5	-0.664725	8.53809	-4.92861	1.12675e-06	1.04278e-05	4.95086
MIR635	0.549796	-1.54707	4.92669	1.13736e-06	1.05203e-05	4.94193
FBL	0.413124	7.18589	4.92619	1.14015e-06	1.05404e-05	4.9396
UNC119	0.343193	4.57117	4.92548	1.1441e-06	1.05711e-05	4.93631
ZNF286B	0.557473	-0.168304	4.92488	1.14743e-06	1.05961e-05	4.93354
MST1P2	1.02479	-0.927434	4.92379	1.15356e-06	1.0647e-05	4.92847
ABCA13	1.37918	3.25156	4.92351	1.15515e-06	1.06559e-05	4.92716
PKM	-0.308558	11.1167	-4.92325	1.15659e-06	1.06634e-05	4.92597
HNRNPU-AS1	0.670063	1.16317	4.92242	1.16132e-06	1.07013e-05	4.92208
DNAJC27-AS1	0.599553	-1.37644	4.91978	1.17632e-06	1.08308e-05	4.90986
DLX6	1.16911	0.341245	4.91973	1.17666e-06	1.08308e-05	4.90959
SLC22A15	-0.588913	2.29268	-4.9195	1.17793e-06	1.08367e-05	4.90856
C1orf228	0.715933	-1.15798	4.91937	1.17872e-06	1.08377e-05	4.90792
STARD3NL	-0.456154	4.11269	-4.91926	1.17931e-06	1.08377e-05	4.90744
CYP2T1P	0.69343	-0.919842	4.91891	1.18134e-06	1.08505e-05	4.9058
GJB2	-1.04231	9.13687	-4.91842	1.18417e-06	1.08706e-05	4.90353
LACTB	-0.26898	4.30212	-4.91801	1.18653e-06	1.08865e-05	4.90163
RP11-66N24.4	0.656242	-1.49952	4.91687	1.19315e-06	1.09377e-05	4.89634
LINC00162	-1.54087	0.0322299	-4.91683	1.1934e-06	1.09377e-05	4.89614
USP3-AS1	0.506665	-1.13993	4.91647	1.19546e-06	1.09507e-05	4.89449
PCED1B-AS1	0.686302	1.43744	4.91598	1.19834e-06	1.09711e-05	4.8922
CLDN4	0.892082	6.83946	4.91526	1.20253e-06	1.10036e-05	4.88888
KLHL35	1.07783	-0.0413009	4.91388	1.21062e-06	1.10717e-05	4.88249
PIR	0.684726	4.1632	4.9127	1.21763e-06	1.11298e-05	4.877
MMP12	-0.944018	5.11386	-4.91199	1.22183e-06	1.11622e-05	4.87372
C5	0.757386	1.50161	4.91166	1.22378e-06	1.1174e-05	4.8722
GBP5	-1.11661	5.12591	-4.91109	1.2272e-06	1.11993e-05	4.86954
KMT2E-AS1	0.549915	0.954519	4.91061	1.23008e-06	1.12195e-05	4.86731
ITGB4	-0.573088	9.57752	-4.91048	1.23083e-06	1.12203e-05	4.86673
HSPA12A	-0.798702	2.73573	-4.90995	1.23403e-06	1.12435e-05	4.86426
RP4-714D9.5	0.566086	-0.450559	4.90959	1.2362e-06	1.12573e-05	4.86259
MYO15A	0.678272	-1.29669	4.90898	1.23984e-06	1.12844e-05	4.85979
KTN1	-0.37986	8.14695	-4.90856	1.24241e-06	1.13018e-05	4.85781
MORN1	0.423566	2.00844	4.90731	1.24996e-06	1.13644e-05	4.85204
TSNAXIP1	0.651378	-1.38635	4.90671	1.2536e-06	1.13914e-05	4.84928
PGAP1	0.550179	4.18378	4.90599	1.25804e-06	1.14256e-05	4.84591
LINC00885	0.998274	0.153881	4.90582	1.25905e-06	1.14287e-05	4.84515
PPAP2B	0.678804	4.70388	4.90503	1.26387e-06	1.14604e-05	4.84151
PCP4L1	1.43028	0.86793	4.90503	1.26389e-06	1.14604e-05	4.8415
GYG2	0.888189	0.50613	4.90452	1.26703e-06	1.14828e-05	4.83913
TTC25	0.747924	-1.33498	4.90341	1.27392e-06	1.15391e-05	4.83397
PTCH1	0.733997	2.97288	4.90233	1.28059e-06	1.15876e-05	4.829
MCM2	0.53933	6.72467	4.90232	1.28063e-06	1.15876e-05	4.82897
RP11-617F23.1	0.601136	1.42746	4.90123	1.28744e-06	1.1643e-05	4.82392
MAGI2	0.663109	0.879056	4.89971	1.29699e-06	1.17231e-05	4.81689
RP11-441O15.3	0.633375	-1.24356	4.89914	1.3006e-06	1.17495e-05	4.81424
CFAP43	0.749368	-1.46968	4.89874	1.30313e-06	1.17662e-05	4.81239
C16orf71	0.563391	-1.08356	4.8972	1.31292e-06	1.18483e-05	4.80526
ITGB1	-0.596775	8.04734	-4.89572	1.32234e-06	1.19269e-05	4.79846
LSM8	0.335237	4.31688	4.89457	1.32976e-06	1.19876e-05	4.79313
EPGN	-1.57655	1.73086	-4.89434	1.33124e-06	1.19945e-05	4.79208
HSF4	0.786543	1.90635	4.89368	1.33555e-06	1.20218e-05	4.789
KCNAB3	0.678281	-0.0333496	4.89366	1.33568e-06	1.20218e-05	4.78891
GK	0.554126	2.63531	4.89346	1.33693e-06	1.20267e-05	4.78802
ANKMY1	0.357446	2.84696	4.89284	1.34098e-06	1.20568e-05	4.78514
ST6GALNAC1	1.15574	2.3659	4.89272	1.34174e-06	1.20573e-05	4.7846
DNAJA2	-0.216329	6.26578	-4.88952	1.36272e-06	1.22393e-05	4.76983
MST1	0.674208	0.766046	4.88896	1.36648e-06	1.22666e-05	4.76721
OSGEPL1	0.398619	2.30453	4.88883	1.36729e-06	1.22674e-05	4.76664
RP11-434H6.7	0.604749	-1.42785	4.88828	1.37096e-06	1.22939e-05	4.76409
SLC17A9	0.74539	2.03803	4.88725	1.37781e-06	1.23488e-05	4.75935
LGALS1	-0.630717	8.1531	-4.88655	1.38251e-06	1.23845e-05	4.7561
IFT140	0.42628	3.81186	4.88576	1.38777e-06	1.2425e-05	4.75249
POLG2	0.391945	2.3799	4.88543	1.39004e-06	1.24388e-05	4.75093
PAIP2B	0.555421	2.68371	4.88458	1.39579e-06	1.24837e-05	4.74701
THUMPD3-AS1	0.487724	2.26818	4.88409	1.39908e-06	1.25065e-05	4.74477
PPP2R3B	0.28719	-0.975188	4.88252	1.40978e-06	1.25956e-05	4.73752
EFCAB13	0.689542	-0.612193	4.88154	1.41646e-06	1.26487e-05	4.73301
HPDL	1.05686	0.581212	4.88118	1.41891e-06	1.26639e-05	4.73137
CTD-2396E7.11	0.681924	2.39815	4.88056	1.42318e-06	1.26954e-05	4.72851
TRMT2A	0.314186	4.90394	4.88042	1.42416e-06	1.26974e-05	4.72786
ZNF853	0.905718	1.23852	4.88026	1.42528e-06	1.27008e-05	4.72711
APP	-0.401255	9.68027	-4.87987	1.42798e-06	1.27182e-05	4.72531
RSRP1	0.601136	4.2963	4.87915	1.43291e-06	1.27555e-05	4.72203
FBF1	0.287627	-1.80934	4.87896	1.43425e-06	1.27607e-05	4.72114
PCM1	0.36925	6.10722	4.87789	1.44174e-06	1.28206e-05	4.71618
ZFAND4	0.486542	1.97846	4.87571	1.457e-06	1.29496e-05	4.70616
TNKS	0.395361	5.04025	4.87523	1.4604e-06	1.29625e-05	4.70394
C21orf58	0.548899	2.23357	4.87519	1.46064e-06	1.29625e-05	4.70379
ZNF420	0.779496	1.26128	4.87518	1.46073e-06	1.29625e-05	4.70373
RP11-257O5.2	0.441481	0.591058	4.8744	1.46623e-06	1.30045e-05	4.70015
LLGL2	0.495055	5.47449	4.8737	1.47126e-06	1.30423e-05	4.6969
NCALD	0.699809	3.14815	4.87328	1.47419e-06	1.30615e-05	4.695
ACAP2	0.494332	6.16247	4.87275	1.47798e-06	1.30883e-05	4.69256
PRODH	0.939099	2.45312	4.8723	1.48123e-06	1.31102e-05	4.69047
FAM86B3P	0.63727	0.0845706	4.8718	1.48478e-06	1.31348e-05	4.68819
MAGI1	0.445911	3.56112	4.87093	1.49105e-06	1.31835e-05	4.68418
RFWD2	0.253819	5.3535	4.86663	1.52233e-06	1.34531e-05	4.66442
LYRM9	0.60092	0.799123	4.86311	1.54841e-06	1.36764e-05	4.64826
EXOSC5	0.360812	4.44938	4.86182	1.55809e-06	1.37548e-05	4.64233
DCXR	0.421682	5.2474	4.86105	1.56394e-06	1.37993e-05	4.63877
SLC9A1	-0.32659	6.59203	-4.85848	1.58341e-06	1.39638e-05	4.62699
SMAP2	0.320987	5.36936	4.85755	1.59053e-06	1.40194e-05	4.62273
ADM5	0.605689	-0.226936	4.85437	1.61512e-06	1.42167e-05	4.60813
USP30	0.277393	3.2791	4.85434	1.61531e-06	1.42167e-05	4.60802
CCDC28B	0.631339	2.01584	4.85433	1.61542e-06	1.42167e-05	4.60795
IGFBP6	-1.09882	5.91345	-4.8542	1.61643e-06	1.42182e-05	4.60736
SREBF1	0.438246	7.32477	4.85317	1.62448e-06	1.42817e-05	4.60263
RP11-774O3.3	0.618245	0.841785	4.85298	1.62593e-06	1.42871e-05	4.60178
RP11-1246C19.1	0.675682	0.613489	4.85185	1.6348e-06	1.43576e-05	4.59661
JAK3	0.635489	3.73341	4.85148	1.63773e-06	1.43759e-05	4.59491
PDE5A	0.644834	2.73357	4.8511	1.64073e-06	1.43948e-05	4.59316
BRI3BP	0.381175	4.99985	4.85064	1.64439e-06	1.44195e-05	4.59104
ZNF428	0.438427	3.95982	4.85032	1.64689e-06	1.4434e-05	4.5896
NELFA	0.272783	5.11505	4.85007	1.64891e-06	1.44442e-05	4.58844
RP11-307C12.11	0.577881	-0.0136636	4.84975	1.65147e-06	1.44592e-05	4.58696
PDP1	-0.415448	5.70719	-4.84798	1.66555e-06	1.45751e-05	4.57888
CDC25B	-0.41851	7.25916	-4.84617	1.68015e-06	1.46952e-05	4.57058
PHLDA2	-0.50387	4.63646	-4.84369	1.7003e-06	1.48639e-05	4.55924
GRIN1	0.985739	-1.16119	4.84333	1.70329e-06	1.48824e-05	4.55757
GPR89B	0.365469	0.810099	4.84316	1.70467e-06	1.48868e-05	4.5568
RP11-147L13.11	0.449264	3.78751	4.84048	1.72677e-06	1.50721e-05	4.54455
TMEM191A	0.491469	1.20225	4.84018	1.72924e-06	1.50837e-05	4.54319
DPYSL2	0.478537	5.54045	4.84009	1.73005e-06	1.50837e-05	4.54274
GMCL1	0.379099	4.43838	4.84	1.73076e-06	1.50837e-05	4.54235
COLGALT2	1.11541	-0.0839396	4.83978	1.73262e-06	1.50922e-05	4.54133
FLRT3	-1.52546	3.16721	-4.83707	1.75532e-06	1.52794e-05	4.52895
CHAF1A	0.434285	5.20365	4.837	1.7559e-06	1.52794e-05	4.52864
SMG9	0.35326	4.7949	4.8352	1.77111e-06	1.54039e-05	4.52043
NDUFB4	0.320312	6.38907	4.83484	1.77423e-06	1.54232e-05	4.51876
CEL	1.40691	0.759262	4.83425	1.77926e-06	1.54589e-05	4.51607
CSAD	0.577775	2.96246	4.83343	1.78629e-06	1.55121e-05	4.51232
USP20	0.265366	4.82945	4.83172	1.80097e-06	1.56317e-05	4.50453
RP11-22B23.1	0.6294	1.11239	4.83137	1.80405e-06	1.56504e-05	4.50291
TMEM243	0.377758	3.12134	4.82995	1.81636e-06	1.57475e-05	4.49644
FBXL16	0.779816	2.21659	4.82987	1.81709e-06	1.57475e-05	4.49606
ZNF414	0.331993	3.09791	4.82754	1.83745e-06	1.59158e-05	4.48546
CHCHD10	0.608895	4.20997	4.82702	1.84209e-06	1.59479e-05	4.48306
SELENBP1	0.831282	2.50727	4.82662	1.84562e-06	1.59704e-05	4.48124
MANSC1	0.785047	4.09072	4.82606	1.85057e-06	1.60051e-05	4.47869
INSIG1	0.464994	5.1589	4.8233	1.8752e-06	1.62099e-05	4.46612
BMP6	0.777982	0.893444	4.82091	1.89684e-06	1.63886e-05	4.45521
AC018766.4	0.679497	-1.35074	4.82001	1.90501e-06	1.64508e-05	4.45113
FAM120C	0.46343	3.25797	4.81947	1.9099e-06	1.64847e-05	4.44869
AC002310.14	0.572163	-0.0852365	4.81908	1.91348e-06	1.65073e-05	4.44691
RP11-498C9.15	0.505481	1.27825	4.81896	1.91461e-06	1.65086e-05	4.44635
EMP2	0.438614	7.44462	4.81774	1.9258e-06	1.65967e-05	4.4408
LENG9	0.400754	2.48899	4.817	1.93269e-06	1.66477e-05	4.43741
PLLP	0.647434	2.83274	4.81622	1.93989e-06	1.67013e-05	4.43387
RP11-126K1.2	0.480715	-1.41395	4.81592	1.94265e-06	1.67166e-05	4.43252
AGR2	1.25078	3.09484	4.81439	1.95695e-06	1.68311e-05	4.42555
RP4-639F20.1	0.706804	-0.00727497	4.81377	1.96279e-06	1.68728e-05	4.42272
RP11-299J3.8	0.481802	-0.820903	4.81325	1.96763e-06	1.69059e-05	4.42038
CCSER1	1.21043	-1.26515	4.81269	1.97297e-06	1.69433e-05	4.4178
MBLAC1	0.458562	0.415514	4.81254	1.97436e-06	1.69467e-05	4.41713
TTI2	0.334464	3.2992	4.81077	1.99117e-06	1.70824e-05	4.40906
RGMA	0.829328	4.40118	4.8106	1.99276e-06	1.70874e-05	4.40831
IQCC	0.44134	1.69783	4.80964	2.00197e-06	1.71577e-05	4.40392
LINC00852	0.529249	-1.19547	4.80882	2.0098e-06	1.72162e-05	4.40021
ZNF219	0.432352	5.05842	4.80849	2.013e-06	1.72349e-05	4.3987
RP11-571L19.8	0.530118	-1.12941	4.80763	2.02122e-06	1.72966e-05	4.39482
LPHN1	0.63644	5.03535	4.8075	2.0225e-06	1.72989e-05	4.39422
LRP11	-0.349626	6.00912	-4.80462	2.05052e-06	1.75264e-05	4.38114
CEP131	0.377873	4.19035	4.80456	2.05116e-06	1.75264e-05	4.38085
ZYX	-0.305102	7.74127	-4.80329	2.06365e-06	1.76243e-05	4.37507
CACUL1	-0.247959	6.21553	-4.803	2.06651e-06	1.76399e-05	4.37376
CCHCR1	0.438772	4.62702	4.80287	2.06777e-06	1.76418e-05	4.37318
AF131217.1	1.17985	-0.650909	4.80104	2.08596e-06	1.7788e-05	4.36486
[truncated: 15,040 more rows]
