# Supplementary material for: Comprehensive characterization of the tumor microenvironment for assessing immunotherapy outcome in patients with head and neck squamous cell carcinoma
Source: Aging (Albany NY). 2020 Nov 18;12(22):22509–26. doi: 10.18632/aging.103460 (PMC7746351; doi:10.18632/aging.103460)
Supplement: Supplementary Table 3 [file aging-12-103460-s004..xlsx]

## Sheet: impGOBP_limma
Supplementary Table 3. Immune-related pathways related to differentially expressed genes.
	ID	Description	GeneRatio	BgRatio	pvalue	p.adjust	qvalue	geneID	Count
GO:0050851	GO:0050851	antigen receptor-mediated signaling pathway	31/209	259/18493	6.20094e-23	1.63643e-19	1.42556e-19	5788/9402/3702/9840/8631/10666/53347/917/50852/1493/387357/916/28638/2633/974/933/596/930/3503/3502/973/115352/3514/3538/3539/3494/3501/3493/3500/3507/100423062	31
GO:0051249	GO:0051249	regulation of lymphocyte activation	38/209	472/18493	9.51845e-22	1.25596e-18	1.09412e-18	5788/3594/9402/921/914/54440/9840/22806/1493/29851/201633/151888/5133/916/28638/933/857/4602/55024/115650/596/3503/3502/54900/3662/939/115352/51237/6363/3514/3538/3539/3494/3501/3493/3500/3507/100423062	38
GO:0050867	GO:0050867	positive regulation of cell activation	33/209	384/18493	8.09725e-20	6.45453e-17	5.62282e-17	5788/3594/9402/921/914/54440/9840/10666/1493/29851/151888/5133/916/28638/857/4602/115650/596/6403/3503/3502/939/115352/6363/3514/3538/3539/3494/3501/3493/3500/3507/100423062	33
GO:0002768	GO:0002768	immune response-regulating cell surface receptor signaling pathway	35/209	445/18493	9.7833e-20	6.45453e-17	5.62282e-17	5788/9402/3702/9840/8631/10666/53347/917/50852/1493/387357/151888/916/28638/2633/974/933/2822/5284/596/200958/930/3503/3502/973/115352/3514/3538/3539/3494/3501/3493/3500/3507/100423062	35
GO:0002696	GO:0002696	positive regulation of leukocyte activation	32/209	372/18493	2.99854e-19	1.56944e-16	1.3672e-16	5788/3594/9402/921/914/54440/9840/10666/1493/29851/151888/5133/916/28638/857/4602/115650/596/3503/3502/939/115352/6363/3514/3538/3539/3494/3501/3493/3500/3507/100423062	32
GO:0050853	GO:0050853	B cell receptor signaling pathway	21/209	122/18493	3.56825e-19	1.56944e-16	1.3672e-16	5788/3702/1493/28638/974/933/596/930/3503/3502/973/115352/3514/3538/3539/3494/3501/3493/3500/3507/100423062	21
GO:0002429	GO:0002429	immune response-activating cell surface receptor signaling pathway	33/209	414/18493	8.11157e-19	3.05806e-16	2.66401e-16	5788/9402/3702/9840/8631/10666/53347/917/50852/1493/387357/916/28638/2633/974/933/2822/596/200958/930/3503/3502/973/115352/3514/3538/3539/3494/3501/3493/3500/3507/100423062	33
GO:0051251	GO:0051251	positive regulation of lymphocyte activation	30/209	333/18493	1.17779e-18	3.88522e-16	3.38458e-16	5788/3594/9402/921/54440/9840/1493/29851/151888/5133/916/28638/857/4602/115650/596/3503/3502/939/115352/6363/3514/3538/3539/3494/3501/3493/3500/3507/100423062	30
GO:0042113	GO:0042113	B cell activation	28/209	303/18493	9.32457e-18	2.66326e-15	2.32008e-15	5788/2322/54440/22806/1493/28638/974/933/55024/115650/596/3503/3502/973/54900/939/931/115352/51237/3514/3538/3539/3494/3501/3493/3500/3507/100423062	28
GO:0050864	GO:0050864	regulation of B cell activation	23/209	183/18493	1.00919e-17	2.66326e-15	2.32008e-15	5788/54440/22806/1493/28638/933/55024/115650/596/3503/3502/939/115352/51237/3514/3538/3539/3494/3501/3493/3500/3507/100423062	23
GO:0042110	GO:0042110	T cell activation	29/209	451/18493	3.47082e-14	8.32681e-12	7.25384e-12	3683/5788/3594/9402/944/921/3702/914/54440/9840/925/917/114836/1493/29851/387357/201633/151888/5133/916/857/4602/115650/596/54900/4063/3662/939/6363	29
GO:0050871	GO:0050871	positive regulation of B cell activation	18/209	144/18493	4.53285e-14	9.96849e-12	8.68399e-12	5788/54440/28638/115650/596/3503/3502/939/115352/3514/3538/3539/3494/3501/3493/3500/3507/100423062	18
GO:0030098	GO:0030098	lymphocyte differentiation	25/209	344/18493	1.51369e-13	3.0728e-11	2.67685e-11	5788/3594/944/3702/914/2322/54440/9840/925/917/22806/114836/1493/387357/10320/916/974/4602/596/973/4063/3662/939/115352/6363	25
GO:0002460	GO:0002460	adaptive immune response based on somatic recombination of immune receptors built from immunoglobulin superfamily domains	25/209	354/18493	2.88462e-13	5.43752e-11	4.73686e-11	5788/3594/54440/10666/925/114836/28638/1191/55061/115650/3503/3502/4063/3662/939/6363/3514/3538/3539/3494/3501/3493/3500/3507/100423062	25
GO:0002449	GO:0002449	lymphocyte mediated immunity	24/209	344/18493	1.15636e-12	2.03443e-10	1.77228e-10	57823/5788/3594/54440/10666/10225/925/114836/4068/28638/1191/55061/3503/3502/939/3514/3538/3539/3494/3501/3493/3500/3507/100423062	24
GO:0006959	GO:0006959	humoral immune response	24/209	349/18493	1.57585e-12	2.59917e-10	2.26425e-10	5788/4068/5133/28638/6373/6480/5450/1191/55061/596/930/3503/3502/931/3627/3514/3538/3539/3494/3501/3493/3500/3507/100423062	24
GO:0022409	GO:0022409	positive regulation of cell-cell adhesion	20/209	251/18493	8.78655e-12	1.36398e-09	1.18822e-09	5788/3594/9402/921/54440/9840/8631/1493/29851/151888/5133/916/857/2651/4602/3169/115650/6657/939/6363	20
GO:0030217	GO:0030217	T cell differentiation	19/209	234/18493	2.14794e-11	3.14912e-09	2.74334e-09	5788/3594/944/3702/914/54440/9840/925/917/114836/1493/387357/916/4602/596/4063/3662/939/6363	19
GO:0043368	GO:0043368	positive T cell selection	9/209	35/18493	1.38573e-10	1.8953e-08	1.65107e-08	5788/3594/917/114836/387357/916/596/4063/3662	9
GO:0002455	GO:0002455	humoral immune response mediated by circulating immunoglobulin	15/209	149/18493	1.46192e-10	1.8953e-08	1.65107e-08	5788/28638/1191/55061/3503/3502/3514/3538/3539/3494/3501/3493/3500/3507/100423062	15
GO:0007159	GO:0007159	leukocyte cell-cell adhesion	21/209	327/18493	1.50819e-10	1.8953e-08	1.65107e-08	3683/5788/3594/9402/921/54440/9840/8631/1493/29851/201633/151888/5133/916/857/4602/115650/6403/54900/939/6363	21
GO:0006910	GO:0006910	phagocytosis	recognition	12/209	84/18493	1.75168e-10	2.10122e-08	1.83047e-08	28638/3503/3502/3514/3538/3539/3494/3501/3493/3500/3507/100423062	12
GO:0050863	GO:0050863	regulation of T cell activation	20/209	305/18493	2.92581e-10	3.35704e-08	2.92447e-08	5788/3594/9402/921/914/54440/9840/1493/29851/201633/151888/5133/916/857/4602/115650/54900/3662/939/6363	20
GO:0016064	GO:0016064	immunoglobulin mediated immune response	17/209	212/18493	3.09e-10	3.39772e-08	2.9599e-08	5788/10666/28638/1191/55061/3503/3502/939/3514/3538/3539/3494/3501/3493/3500/3507/100423062	17
GO:0019724	GO:0019724	B cell mediated immunity	17/209	213/18493	3.32495e-10	3.50982e-08	3.05755e-08	5788/10666/28638/1191/55061/3503/3502/939/3514/3538/3539/3494/3501/3493/3500/3507/100423062	17
GO:1903039	GO:1903039	positive regulation of leukocyte cell-cell adhesion	17/209	214/18493	3.57631e-10	3.62995e-08	3.16221e-08	5788/3594/9402/921/54440/9840/8631/1493/29851/151888/5133/916/857/4602/115650/939/6363	17
GO:0031295	GO:0031295	T cell costimulation	10/209	54/18493	4.25233e-10	4.15626e-08	3.6207e-08	9402/921/1493/29851/151888/5133/916/857/115650/6363	10
GO:0006958	GO:0006958	complement activation	classical pathway	14/209	137/18493	5.00222e-10	4.68332e-08	4.07984e-08	28638/1191/55061/3503/3502/3514/3538/3539/3494/3501/3493/3500/3507/100423062	14
GO:0031294	GO:0031294	lymphocyte costimulation	10/209	55/18493	5.1465e-10	4.68332e-08	4.07984e-08	9402/921/1493/29851/151888/5133/916/857/115650/6363	10
GO:0022407	GO:0022407	regulation of cell-cell adhesion	22/209	388/18493	5.77448e-10	5.07962e-08	4.42507e-08	5788/3594/9402/921/54440/9840/8631/1493/29851/201633/151888/5133/916/857/2651/4602/3169/115650/6657/54900/939/6363	22
GO:0045785	GO:0045785	positive regulation of cell adhesion	22/209	397/18493	8.87624e-10	7.55626e-08	6.58259e-08	5788/3594/9402/921/54440/9840/8631/1493/29851/151888/5133/916/5764/857/10551/2651/4602/3169/115650/6657/939/6363	22
GO:0006956	GO:0006956	complement activation	15/209	170/18493	9.415e-10	7.76443e-08	6.76393e-08	28638/1191/55061/930/3503/3502/3514/3538/3539/3494/3501/3493/3500/3507/100423062	15
GO:1903037	GO:1903037	regulation of leukocyte cell-cell adhesion	19/209	293/18493	1.0034e-09	8.0242e-08	6.99023e-08	5788/3594/9402/921/54440/9840/8631/1493/29851/201633/151888/5133/916/857/4602/115650/54900/939/6363	19
GO:0050870	GO:0050870	positive regulation of T cell activation	16/209	202/18493	1.25406e-09	9.7337e-08	8.47945e-08	5788/3594/9402/921/54440/9840/1493/29851/151888/5133/916/857/4602/115650/939/6363	16
GO:0045058	GO:0045058	T cell selection	9/209	48/18493	2.89889e-09	2.18576e-07	1.90411e-07	5788/3594/917/114836/387357/916/596/4063/3662	9
GO:0006911	GO:0006911	phagocytosis	engulfment	12/209	112/18493	5.19289e-09	3.80668e-07	3.31616e-07	28638/3503/3502/3514/3538/3539/3494/3501/3493/3500/3507/100423062	12
GO:0072376	GO:0072376	protein activation cascade	15/209	194/18493	5.83375e-09	4.16088e-07	3.62472e-07	28638/1191/55061/930/3503/3502/3514/3538/3539/3494/3501/3493/3500/3507/100423062	15
GO:0042100	GO:0042100	B cell proliferation	11/209	91/18493	6.33993e-09	4.40291e-07	3.83557e-07	5788/54440/22806/1493/933/115650/596/973/931/115352/51237	11
GO:0099024	GO:0099024	plasma membrane invagination	12/209	121/18493	1.25896e-08	8.51898e-07	7.42125e-07	28638/3503/3502/3514/3538/3539/3494/3501/3493/3500/3507/100423062	12
GO:0030888	GO:0030888	regulation of B cell proliferation	9/209	59/18493	1.95083e-08	1.28706e-06	1.12121e-06	5788/54440/22806/1493/933/115650/596/115352/51237	9
GO:0008037	GO:0008037	cell recognition	15/209	213/18493	2.06494e-08	1.32912e-06	1.15785e-06	921/10666/28638/3503/3502/6363/3514/3538/3539/3494/3501/3493/3500/3507/100423062	15
GO:0042742	GO:0042742	defense response to bacterium	18/209	319/18493	2.4655e-08	1.54916e-06	1.34954e-06	944/3394/219972/28638/1690/51316/6403/3503/3502/3514/3538/3539/3494/3501/3493/3500/3507/100423062	18
GO:0010324	GO:0010324	membrane invagination	12/209	129/18493	2.6003e-08	1.59586e-06	1.39022e-06	28638/3503/3502/3514/3538/3539/3494/3501/3493/3500/3507/100423062	12
GO:0002697	GO:0002697	regulation of immune effector process	21/209	439/18493	2.87692e-08	1.7255e-06	1.50316e-06	5788/3594/54440/10666/10225/114836/4068/933/4602/1191/55061/930/3503/3502/3662/115352/51237/6363/3514/3501/3500	21
GO:0046631	GO:0046631	alpha-beta T cell activation	12/209	134/18493	3.98636e-08	2.33778e-06	2.03654e-06	5788/3594/944/3702/54440/114836/916/4602/596/4063/3662/6363	12
GO:0050852	GO:0050852	T cell receptor signaling pathway	12/209	150/18493	1.39305e-07	7.99189e-06	6.96208e-06	5788/9402/3702/9840/8631/10666/53347/917/50852/387357/916/2633	12
GO:0070661	GO:0070661	leukocyte proliferation	16/209	283/18493	1.47934e-07	8.30636e-06	7.23603e-06	5788/3594/2322/54440/22806/1493/916/933/1191/115650/596/973/931/115352/51237/6363	16
GO:0046632	GO:0046632	alpha-beta T cell differentiation	10/209	101/18493	2.15274e-07	1.18356e-05	1.03105e-05	3594/944/3702/54440/114836/4602/596/4063/3662/6363	10
GO:0050854	GO:0050854	regulation of antigen receptor-mediated signaling pathway	8/209	57/18493	2.39162e-07	1.28806e-05	1.12208e-05	5788/9840/10666/53347/50852/2633/933/115352	8
GO:0032609	GO:0032609	interferon-gamma production	10/209	106/18493	3.39847e-07	1.78194e-05	1.55233e-05	3594/3702/914/54440/3394/10666/10225/114836/916/115650	10
GO:0046651	GO:0046651	lymphocyte proliferation	15/209	264/18493	3.44369e-07	1.78194e-05	1.55233e-05	5788/3594/2322/54440/22806/1493/916/933/115650/596/973/931/115352/51237/6363	15
GO:0006909	GO:0006909	phagocytosis	17/209	342/18493	3.73388e-07	1.88842e-05	1.64508e-05	3683/5788/6504/3394/917/28638/3503/3502/3514/3538/3539/3494/3501/3493/3500/3507/100423062	17
GO:0032943	GO:0032943	mononuclear cell proliferation	15/209	266/18493	3.79258e-07	1.88842e-05	1.64508e-05	5788/3594/2322/54440/22806/1493/916/933/115650/596/973/931/115352/51237/6363	15
GO:0045619	GO:0045619	regulation of lymphocyte differentiation	12/209	166/18493	4.19741e-07	2.05129e-05	1.78697e-05	5788/3594/914/54440/9840/22806/1493/4602/3662/939/115352/6363	12
GO:0032729	GO:0032729	positive regulation of interferon-gamma production	8/209	63/18493	5.28938e-07	2.53794e-05	2.21091e-05	3594/914/54440/3394/10666/114836/916/115650	8
GO:0032649	GO:0032649	regulation of interferon-gamma production	9/209	95/18493	1.28426e-06	6.05207e-05	5.27222e-05	3594/914/54440/3394/10666/10225/114836/916/115650	9
GO:0001895	GO:0001895	retina homeostasis	8/209	73/18493	1.6667e-06	7.71653e-05	6.72221e-05	1258/11272/124220/5284/3502/3514/3494/3493	8
GO:0002363	GO:0002363	alpha-beta T cell lineage commitment	5/209	19/18493	1.79647e-06	8.17392e-05	7.12065e-05	3594/114836/596/4063/3662	5
GO:0051480	GO:0051480	regulation of cytosolic calcium ion concentration	16/209	350/18493	2.48153e-06	0.000110996	9.66935e-05	27334/5788/1234/10663/1233/2833/6373/1258/857/5023/55503/596/111/930/3627/6363	16
GO:0043369	GO:0043369	CD4-positive or CD8-positive	alpha-beta T cell lineage commitment	5/209	21/18493	3.08645e-06	0.000135752	0.00011826	3594/114836/596/4063/3662	5
GO:0045580	GO:0045580	regulation of T cell differentiation	10/209	137/18493	3.6114e-06	0.000156237	0.000136105	5788/3594/914/54440/9840/1493/4602/3662/939/6363	10
GO:0050670	GO:0050670	regulation of lymphocyte proliferation	12/209	205/18493	3.89073e-06	0.000165607	0.000144267	5788/3594/54440/22806/1493/916/933/115650/596/115352/51237/6363	12
GO:0032944	GO:0032944	regulation of mononuclear cell proliferation	12/209	206/18493	4.09088e-06	0.000171363	0.000149281	5788/3594/54440/22806/1493/916/933/115650/596/115352/51237/6363	12
GO:0001819	GO:0001819	positive regulation of cytokine production	17/209	422/18493	6.50747e-06	0.000268332	0.000233755	5788/3594/914/54440/3394/10666/114836/201633/916/55540/4602/1191/2069/115650/4063/3662/6363	17
GO:0070663	GO:0070663	regulation of leukocyte proliferation	12/209	216/18493	6.64895e-06	0.000269948	0.000235163	5788/3594/54440/22806/1493/916/933/115650/596/115352/51237/6363	12
GO:0072540	GO:0072540	T-helper 17 cell lineage commitment	4/209	12/18493	7.30877e-06	0.00029224	0.000254583	3594/114836/4063/3662	4
GO:0001894	GO:0001894	tissue homeostasis	12/209	221/18493	8.38954e-06	0.000330448	0.000287867	54440/1258/11272/2651/7033/124220/5284/596/3502/3514/3494/3493	12
GO:0002360	GO:0002360	T cell lineage commitment	5/209	26/18493	9.52866e-06	0.000369796	0.000322145	3594/114836/596/4063/3662	5
GO:0072503	GO:0072503	cellular divalent inorganic cation homeostasis	18/209	483/18493	1.00459e-05	0.000384218	0.000334709	27334/5788/1234/10663/1233/2833/6373/1258/857/5023/4502/84239/55503/596/111/930/3627/6363	18
GO:1902105	GO:1902105	regulation of leukocyte differentiation	13/209	265/18493	1.05441e-05	0.000397514	0.000346292	5788/3594/914/54440/9840/22806/1493/4602/146433/3662/939/115352/6363	13
GO:0007204	GO:0007204	positive regulation of cytosolic calcium ion concentration	14/209	309/18493	1.18548e-05	0.00044063	0.000383852	27334/5788/1234/10663/1233/2833/6373/857/55503/596/111/930/3627/6363	14
GO:0002920	GO:0002920	regulation of humoral immune response	9/209	126/18493	1.33125e-05	0.00048794	0.000425066	5788/1191/55061/930/3503/3502/3514/3501/3500	9
GO:0006874	GO:0006874	cellular calcium ion homeostasis	17/209	448/18493	1.41655e-05	0.000512093	0.000446106	27334/5788/1234/10663/1233/2833/6373/1258/857/5023/84239/55503/596/111/930/3627/6363	17
GO:0043367	GO:0043367	CD4-positive	alpha-beta T cell differentiation	7/209	74/18493	2.01848e-05	0.000718861	0.000626231	3594/54440/114836/4602/4063/3662/6363	7
GO:0055074	GO:0055074	calcium ion homeostasis	17/209	461/18493	2.04299e-05	0.000718861	0.000626231	27334/5788/1234/10663/1233/2833/6373/1258/857/5023/84239/55503/596/111/930/3627/6363	17
GO:0002295	GO:0002295	T-helper cell lineage commitment	4/209	16/18493	2.59347e-05	0.000900549	0.000784507	3594/114836/4063/3662	4
GO:0048871	GO:0048871	multicellular organismal homeostasis	17/209	471/18493	2.6819e-05	0.000919161	0.000800721	54440/1258/857/11272/2651/51316/7033/124220/5284/216/596/111/3502/3662/3514/3494/3493	17
GO:0030449	GO:0030449	regulation of complement activation	8/209	107/18493	2.91137e-05	0.000985012	0.000858087	1191/55061/930/3503/3502/3514/3501/3500	8
GO:2000257	GO:2000257	regulation of protein activation cascade	8/209	108/18493	3.11414e-05	0.00104028	0.000906233	1191/55061/930/3503/3502/3514/3501/3500	8
GO:0043373	GO:0043373	CD4-positive	alpha-beta T cell lineage commitment	4/209	17/18493	3.3615e-05	0.00110887	0.000965989	3594/114836/4063/3662	4
GO:0045582	GO:0045582	positive regulation of T cell differentiation	7/209	83/18493	4.27426e-05	0.00139256	0.00121312	5788/3594/54440/9840/4602/939/6363	7
GO:0042093	GO:0042093	T-helper cell differentiation	6/209	57/18493	4.3539e-05	0.00140121	0.00122066	3594/114836/4602/4063/3662/6363	6
GO:0060402	GO:0060402	calcium ion transport into cytosol	9/209	149/18493	5.04216e-05	0.00160316	0.00139659	5788/1234/6373/857/55503/596/930/3627/6363	9
GO:0002294	GO:0002294	CD4-positive	alpha-beta T cell differentiation involved in immune response	6/209	59/18493	5.30559e-05	0.00166684	0.00145206	3594/114836/4602/4063/3662/6363	6
GO:0038093	GO:0038093	Fc receptor signaling pathway	10/209	187/18493	5.45084e-05	0.00169232	0.00147426	5788/9402/3702/917/5284/3503/3502/3514/3501/3500	10
GO:0050856	GO:0050856	regulation of T cell receptor signaling pathway	5/209	37/18493	5.70757e-05	0.00171244	0.00149178	9840/10666/53347/50852/2633	5
GO:0035710	GO:0035710	CD4-positive	alpha-beta T cell activation	7/209	87/18493	5.79078e-05	0.00171244	0.00149178	3594/54440/114836/4602/4063/3662/6363	7
GO:0070098	GO:0070098	chemokine-mediated signaling pathway	7/209	87/18493	5.79078e-05	0.00171244	0.00149178	1234/10663/1233/2833/6373/3627/6363	7
GO:0002287	GO:0002287	alpha-beta T cell activation involved in immune response	6/209	60/18493	5.84009e-05	0.00171244	0.00149178	3594/114836/4602/4063/3662/6363	6
GO:0002293	GO:0002293	alpha-beta T cell differentiation involved in immune response	6/209	60/18493	5.84009e-05	0.00171244	0.00149178	3594/114836/4602/4063/3662/6363	6
GO:0046635	GO:0046635	positive regulation of alpha-beta T cell activation	6/209	61/18493	6.41676e-05	0.00186086	0.00162108	5788/3594/54440/916/4602/6363	6
GO:0046634	GO:0046634	regulation of alpha-beta T cell activation	7/209	91/18493	7.72161e-05	0.00221493	0.00192952	5788/3594/54440/916/4602/3662/6363	7
GO:0050857	GO:0050857	positive regulation of antigen receptor-mediated signaling pathway	4/209	21/18493	8.15864e-05	0.00231512	0.0020168	5788/9840/10666/50852	4
GO:0030890	GO:0030890	positive regulation of B cell proliferation	5/209	40/18493	8.38213e-05	0.00235324	0.00205001	5788/54440/115650/596/115352	5
GO:0030183	GO:0030183	B cell differentiation	8/209	125/18493	8.83479e-05	0.00245421	0.00213797	5788/2322/22806/974/596/973/939/115352	8
GO:0060401	GO:0060401	cytosolic calcium ion transport	9/209	161/18493	9.18261e-05	0.00252426	0.00219899	5788/1234/6373/857/55503/596/930/3627/6363	9
GO:0045621	GO:0045621	positive regulation of lymphocyte differentiation	7/209	94/18493	9.49028e-05	0.00258194	0.00224924	5788/3594/54440/9840/4602/939/6363	7
GO:0002292	GO:0002292	T cell differentiation involved in immune response	6/209	66/18493	0.000100195	0.00267812	0.00233303	3594/114836/4602/4063/3662/6363	6
GO:1990868	GO:1990868	response to chemokine	7/209	95/18493	0.000101482	0.00267812	0.00233303	1234/10663/1233/2833/6373/3627/6363	7
GO:1990869	GO:1990869	cellular response to chemokine	7/209	95/18493	0.000101482	0.00267812	0.00233303	1234/10663/1233/2833/6373/3627/6363	7
GO:0050671	GO:0050671	positive regulation of lymphocyte proliferation	8/209	132/18493	0.000129318	0.00337893	0.00294353	5788/3594/54440/916/115650/596/115352/6363	8
GO:0032946	GO:0032946	positive regulation of mononuclear cell proliferation	8/209	133/18493	0.000136279	0.0035259	0.00307156	5788/3594/54440/916/115650/596/115352/6363	8
GO:0002286	GO:0002286	T cell activation involved in immune response	7/209	101/18493	0.000149204	0.00382281	0.00333021	3683/3594/114836/4602/4063/3662/6363	7
GO:0002507	GO:0002507	tolerance induction	4/209	25/18493	0.000166442	0.00418324	0.0036442	29851/1233/5133/916	4
GO:0050858	GO:0050858	negative regulation of antigen receptor-mediated signaling pathway	4/209	25/18493	0.000166442	0.00418324	0.0036442	53347/2633/933/115352	4
GO:0043370	GO:0043370	regulation of CD4-positive	alpha-beta T cell differentiation	5/209	47/18493	0.000183271	0.00455897	0.00397152	3594/54440/4602/3662/6363	5
GO:0070665	GO:0070665	positive regulation of leukocyte proliferation	8/209	139/18493	0.000184847	0.00455897	0.00397152	5788/3594/54440/916/115650/596/115352/6363	8
GO:0002821	GO:0002821	positive regulation of adaptive immune response	7/209	105/18493	0.000190086	0.00464478	0.00404627	5788/3594/54440/8631/10666/115650/6363	7
GO:0002431	GO:0002431	Fc receptor mediated stimulatory signaling pathway	8/209	140/18493	0.000194177	0.00467755	0.00407481	5788/10666/917/3503/3502/3514/3501/3500	8
GO:0072539	GO:0072539	T-helper 17 cell differentiation	4/209	26/18493	0.000194972	0.00467755	0.00407481	3594/114836/4063/3662	4
GO:0019722	GO:0019722	calcium-mediated signaling	10/209	220/18493	0.000208342	0.00495329	0.00431503	5788/1234/50852/10663/1233/2833/916/2633/933/6403	10
GO:1902107	GO:1902107	positive regulation of leukocyte differentiation	8/209	142/18493	0.000213999	0.00504235	0.00439261	5788/3594/54440/9840/4602/146433/939/6363	8
GO:0045577	GO:0045577	regulation of B cell differentiation	4/209	27/18493	0.000226865	0.00529819	0.00461548	5788/22806/939/115352	4
GO:0072538	GO:0072538	T-helper 17 type immune response	4/209	28/18493	0.000262346	0.00607307	0.00529052	3594/114836/4063/3662	4
GO:0043383	GO:0043383	negative T cell selection	3/209	12/18493	0.00029035	0.00666291	0.00580435	5788/387357/916	3
GO:0002673	GO:0002673	regulation of acute inflammatory response	8/209	149/18493	0.000296892	0.0067543	0.00588396	1191/55061/930/3503/3502/3514/3501/3500	8
GO:1903706	GO:1903706	regulation of hemopoiesis	14/209	418/18493	0.000300318	0.00677384	0.00590098	5788/3594/914/54440/9840/22806/1493/29909/4602/146433/3662/939/115352/6363	14
GO:0032663	GO:0032663	regulation of interleukin-2 production	5/209	53/18493	0.000324562	0.00725863	0.00632331	5788/54440/916/2633/3662	5
GO:0032743	GO:0032743	positive regulation of interleukin-2 production	4/209	30/18493	0.000344989	0.00758688	0.00660926	5788/54440/916/3662	4
GO:0043372	GO:0043372	positive regulation of CD4-positive	alpha-beta T cell differentiation	4/209	30/18493	0.000344989	0.00758688	0.00660926	3594/54440/4602/6363	4
GO:0050900	GO:0050900	leukocyte migration	15/209	478/18493	0.000366639	0.00790257	0.00688427	3683/914/962/1234/2833/6373/857/7424/6403/3627/6363/3514/3494/3493/3507	15
GO:0051260	GO:0051260	protein homooligomerization	12/209	328/18493	0.000370044	0.00790257	0.00688427	917/916/2633/974/857/5023/7915/1191/286676/10361/200958/973	12
GO:0045059	GO:0045059	positive thymic T cell selection	3/209	13/18493	0.000374316	0.00790257	0.00688427	5788/917/916	3
GO:0045086	GO:0045086	positive regulation of interleukin-2 biosynthetic process	3/209	13/18493	0.000374316	0.00790257	0.00688427	5788/916/3662	3
GO:0050862	GO:0050862	positive regulation of T cell receptor signaling pathway	3/209	13/18493	0.000374316	0.00790257	0.00688427	9840/10666/50852	3
GO:0001912	GO:0001912	positive regulation of leukocyte mediated cytotoxicity	5/209	55/18493	0.000386327	0.0080914	0.00704877	5788/3594/10666/114836/4068	5
GO:0002819	GO:0002819	regulation of adaptive immune response	8/209	157/18493	0.000421992	0.0087688	0.00763888	5788/3594/962/54440/8631/10666/115650/6363	8
GO:0035587	GO:0035587	purinergic receptor signaling pathway	4/209	32/18493	0.00044476	0.00916971	0.00798813	27334/29909/5023/111	4
GO:0042108	GO:0042108	positive regulation of cytokine biosynthetic process	5/209	57/18493	0.000456578	0.00926854	0.00807423	5788/916/2069/115650/3662	5
GO:2000514	GO:2000514	regulation of CD4-positive	alpha-beta T cell activation	5/209	57/18493	0.000456578	0.00926854	0.00807423	3594/54440/4602/3662/6363	5
GO:0043217	GO:0043217	myelin maintenance	3/209	14/18493	0.000472443	0.00951738	0.008291	225/79152/1191	3
GO:0032633	GO:0032633	interleukin-4 production	4/209	33/18493	0.00050166	0.0100294	0.00873704	3702/54440/916/3662	4
GO:2000516	GO:2000516	positive regulation of CD4-positive	alpha-beta T cell activation	4/209	34/18493	0.000563554	0.0111821	0.00974122	3594/54440/4602/6363	4
GO:0006968	GO:0006968	cellular defense response	5/209	61/18493	0.000625475	0.0123181	0.0107309	3702/1234/50852/4068/930	5
GO:0045622	GO:0045622	regulation of T-helper cell differentiation	4/209	35/18493	0.000630685	0.0123287	0.0107401	3594/4602/3662/6363	4
GO:0002699	GO:0002699	positive regulation of immune effector process	9/209	209/18493	0.000637195	0.0123644	0.0107712	5788/3594/54440/10666/114836/4068/4602/51237/6363	9
GO:0002228	GO:0002228	natural killer cell mediated immunity	5/209	62/18493	0.000674168	0.0128922	0.011231	57823/10666/10225/114836/4068	5
GO:0032623	GO:0032623	interleukin-2 production	5/209	62/18493	0.000674168	0.0128922	0.011231	5788/54440/916/2633/3662	5
GO:0070613	GO:0070613	regulation of protein processing	8/209	170/18493	0.0007141	0.0135576	0.0118106	1191/55061/930/3503/3502/3514/3501/3500	8
GO:0002637	GO:0002637	regulation of immunoglobulin production	5/209	63/18493	0.000725642	0.0135814	0.0118313	5788/54440/933/115352/51237	5
GO:0046637	GO:0046637	regulation of alpha-beta T cell differentiation	5/209	63/18493	0.000725642	0.0135814	0.0118313	3594/54440/4602/3662/6363	5
GO:0097553	GO:0097553	calcium ion transmembrane import into cytosol	7/209	132/18493	0.000762041	0.0141622	0.0123373	5788/1234/6373/55503/930/3627/6363	7
GO:1903317	GO:1903317	regulation of protein maturation	8/209	172/18493	0.000770804	0.0142248	0.0123919	1191/55061/930/3503/3502/3514/3501/3500	8
GO:0031343	GO:0031343	positive regulation of cell killing	5/209	64/18493	0.000779998	0.0142946	0.0124526	5788/3594/10666/114836/4068	5
GO:0002700	GO:0002700	regulation of production of molecular mediator of immune response	7/209	133/18493	0.000796805	0.0145019	0.0126332	5788/54440/10666/10225/933/115352/51237	7
GO:0042102	GO:0042102	positive regulation of T cell proliferation	6/209	97/18493	0.000815815	0.0147461	0.012846	5788/3594/54440/916/115650/6363	6
GO:0002285	GO:0002285	lymphocyte activation involved in immune response	8/209	174/18493	0.000831076	0.0149198	0.0129973	3683/5788/3594/114836/4602/4063/3662/6363	8
GO:0002791	GO:0002791	regulation of peptide secretion	14/209	465/18493	0.000858963	0.0151921	0.0132345	914/81793/2633/3382/933/55540/2822/286676/7424/55024/111/131177/8447/6363	14
GO:2000811	GO:2000811	negative regulation of anoikis	3/209	17/18493	0.000860782	0.0151921	0.0132345	857/4915/596	3
GO:0002433	GO:0002433	immune response-regulating cell surface receptor signaling pathway involved in phagocytosis	7/209	135/18493	0.000870091	0.0151921	0.0132345	5788/917/3503/3502/3514/3501/3500	7
GO:0038096	GO:0038096	Fc-gamma receptor signaling pathway involved in phagocytosis	7/209	135/18493	0.000870091	0.0151921	0.0132345	5788/917/3503/3502/3514/3501/3500	7
GO:0006816	GO:0006816	calcium ion transport	13/209	413/18493	0.000875031	0.0151921	0.0132345	5788/1234/6373/857/5023/55503/596/930/785/65267/115352/3627/6363	13
GO:0002824	GO:0002824	positive regulation of adaptive immune response based on somatic recombination of immune receptors built from immunoglobulin superfamily domains	6/209	100/18493	0.000957033	0.0165073	0.0143802	5788/3594/54440/10666/115650/6363	6
GO:0038094	GO:0038094	Fc-gamma receptor signaling pathway	7/209	138/18493	0.000989886	0.016963	0.0147772	5788/917/3503/3502/3514/3501/3500	7
GO:0033077	GO:0033077	T cell differentiation in thymus	5/209	69/18493	0.00109855	0.0187038	0.0162937	5788/9840/917/916/596	5
GO:0060249	GO:0060249	anatomical structure homeostasis	13/209	425/18493	0.00113474	0.019196	0.0167224	54440/1258/5023/11272/2651/7033/124220/5284/596/3502/3514/3494/3493	13
GO:0046777	GO:0046777	protein autophosphorylation	9/209	227/18493	0.00114262	0.0192063	0.0167314	5788/3702/2322/11040/857/4915/7424/65268/65267	9
GO:1903708	GO:1903708	positive regulation of hemopoiesis	8/209	183/18493	0.0011509	0.019223	0.016746	5788/3594/54440/9840/4602/146433/939/6363	8
GO:0045076	GO:0045076	regulation of interleukin-2 biosynthetic process	3/209	19/18493	0.00120636	0.0200225	0.0174425	5788/916/3662	3
GO:0001909	GO:0001909	leukocyte mediated cytotoxicity	6/209	105/18493	0.00123334	0.0202161	0.0176111	57823/5788/3594/10666/114836/4068	6
GO:0002708	GO:0002708	positive regulation of lymphocyte mediated immunity	6/209	105/18493	0.00123334	0.0202161	0.0176111	5788/3594/54440/10666/114836/4068	6
GO:0002706	GO:0002706	regulation of lymphocyte mediated immunity	7/209	146/18493	0.0013735	0.0223744	0.0194913	5788/3594/54440/10666/10225/114836/4068	7
GO:0031579	GO:0031579	membrane raft organization	3/209	20/18493	0.00140748	0.0227819	0.0198463	5788/914/857	3
GO:0032760	GO:0032760	positive regulation of tumor necrosis factor production	5/209	73/18493	0.00141578	0.0227819	0.0198463	5788/914/54440/1191/6363	5
GO:0002683	GO:0002683	negative regulation of immune system process	13/209	437/18493	0.00145599	0.023287	0.0202863	5788/10225/53347/1493/29909/201633/5133/2633/933/55024/54900/3662/115352	13
GO:0050708	GO:0050708	regulation of protein secretion	13/209	438/18493	0.00148587	0.0236218	0.0205779	914/81793/2633/3382/933/55540/2822/7424/55024/111/131177/8447/6363	13
GO:0002715	GO:0002715	regulation of natural killer cell mediated immunity	4/209	44/18493	0.0015106	0.0238179	0.0207488	10666/10225/114836/4068	4
GO:0019932	GO:0019932	second-messenger-mediated signaling	13/209	439/18493	0.00151626	0.0238179	0.0207488	5788/1234/50852/10663/1233/2833/916/2633/6373/933/111/6403/3627	13
GO:0033622	GO:0033622	integrin activation	3/209	21/18493	0.00162847	0.0251803	0.0219356	8631/6403/51237	3
GO:0045061	GO:0045061	thymic T cell selection	3/209	21/18493	0.00162847	0.0251803	0.0219356	5788/917/916	3
GO:0051924	GO:0051924	regulation of calcium ion transport	9/209	239/18493	0.00163161	0.0251803	0.0219356	6373/857/5023/596/930/785/65267/115352/3627	9
GO:0001910	GO:0001910	regulation of leukocyte mediated cytotoxicity	5/209	76/18493	0.00169457	0.0258495	0.0225186	5788/3594/10666/114836/4068	5
GO:1903557	GO:1903557	positive regulation of tumor necrosis factor superfamily cytokine production	5/209	76/18493	0.00169457	0.0258495	0.0225186	5788/914/54440/1191/6363	5
GO:0035590	GO:0035590	purinergic nucleotide receptor signaling pathway	3/209	22/18493	0.00186999	0.0280392	0.0244262	27334/29909/5023	3
GO:0042094	GO:0042094	interleukin-2 biosynthetic process	3/209	22/18493	0.00186999	0.0280392	0.0244262	5788/916/3662	3
GO:0045624	GO:0045624	positive regulation of T-helper cell differentiation	3/209	22/18493	0.00186999	0.0280392	0.0244262	3594/4602/6363	3
GO:1905897	GO:1905897	regulation of response to endoplasmic reticulum stress	5/209	78/18493	0.00190153	0.0283511	0.0246979	91319/857/10551/1191/258010	5
GO:0046638	GO:0046638	positive regulation of alpha-beta T cell differentiation	4/209	47/18493	0.00193318	0.028661	0.0249678	3594/54440/4602/6363	4
GO:0051209	GO:0051209	release of sequestered calcium ion into cytosol	6/209	116/18493	0.00205314	0.0302695	0.0263691	5788/1234/6373/930/3627/6363	6
GO:0010996	GO:0010996	response to auditory stimulus	3/209	23/18493	0.0021327	0.031095	0.0270882	497189/93986/3627	3
GO:0032753	GO:0032753	positive regulation of interleukin-4 production	3/209	23/18493	0.0021327	0.031095	0.0270882	54440/916/3662	3
GO:0019730	GO:0019730	antimicrobial humoral response	6/209	118/18493	0.00223816	0.0321462	0.028004	6373/1191/3627/3494/3493/3507	6
GO:0051283	GO:0051283	negative regulation of sequestering of calcium ion	6/209	118/18493	0.00223816	0.0321462	0.028004	5788/1234/6373/930/3627/6363	6
GO:0070838	GO:0070838	divalent metal ion transport	13/209	459/18493	0.00224134	0.0321462	0.028004	5788/1234/6373/857/5023/55503/596/930/785/65267/115352/3627/6363	13
GO:0072511	GO:0072511	divalent inorganic cation transport	13/209	462/18493	0.00237138	0.0338274	0.0294685	5788/1234/6373/857/5023/55503/596/930/785/65267/115352/3627/6363	13
GO:0035588	GO:0035588	G protein-coupled purinergic receptor signaling pathway	3/209	24/18493	0.00241722	0.0338274	0.0294685	27334/29909/111	3
GO:0050855	GO:0050855	regulation of B cell receptor signaling pathway	3/209	24/18493	0.00241722	0.0338274	0.0294685	5788/933/115352	3
GO:2000209	GO:2000209	regulation of anoikis	3/209	24/18493	0.00241722	0.0338274	0.0294685	857/4915/596	3
GO:0032655	GO:0032655	regulation of interleukin-12 production	4/209	50/18493	0.00243122	0.0338274	0.0294685	6504/3394/201633/6363	4
GO:0051282	GO:0051282	regulation of sequestering of calcium ion	6/209	120/18493	0.00243547	0.0338274	0.0294685	5788/1234/6373/930/3627/6363	6
GO:0007009	GO:0007009	plasma membrane organization	5/209	83/18493	0.00249925	0.0345315	0.0300819	5788/225/79152/857/1191	5
GO:0051208	GO:0051208	sequestering of calcium ion	6/209	123/18493	0.00275562	0.0378755	0.032995	5788/1234/6373/930/3627/6363	6
GO:0045089	GO:0045089	positive regulation of innate immune response	10/209	309/18493	0.00278794	0.0380359	0.0331348	10666/114836/81793/4068/1690/857/2069/200958/3662/115352	10
GO:0032615	GO:0032615	interleukin-12 production	4/209	52/18493	0.00280832	0.0380359	0.0331348	6504/3394/201633/6363	4
GO:0002526	GO:0002526	acute inflammatory response	8/209	211/18493	0.00281054	0.0380359	0.0331348	1191/55061/930/3503/3502/3514/3501/3500	8
GO:0045088	GO:0045088	regulation of innate immune response	11/209	365/18493	0.00301595	0.0406076	0.0353751	10666/10225/114836/81793/4068/1690/857/2069/200958/3662/115352	11
GO:2000106	GO:2000106	regulation of leukocyte apoptotic process	5/209	87/18493	0.00306741	0.0410908	0.035796	917/1234/5133/939/6363	5
GO:0031341	GO:0031341	regulation of cell killing	5/209	88/18493	0.00322288	0.0426241	0.0371317	5788/3594/10666/114836/4068	5
GO:0010524	GO:0010524	positive regulation of calcium ion transport into cytosol	4/209	54/18493	0.0032236	0.0426241	0.0371317	6373/857/930/3627	4
GO:0032680	GO:0032680	regulation of tumor necrosis factor production	6/209	127/18493	0.00323032	0.0426241	0.0371317	5788/914/6504/54440/1191/6363	6
GO:0050727	GO:0050727	regulation of inflammatory response	12/209	425/18493	0.00336152	0.0441346	0.0384476	5788/225/81793/55540/1191/55061/930/3503/3502/3514/3501/3500	12
GO:0010818	GO:0010818	T cell chemotaxis	3/209	27/18493	0.00340743	0.0442966	0.0385887	2833/6373/3627	3
GO:0032673	GO:0032673	regulation of interleukin-4 production	3/209	27/18493	0.00340743	0.0442966	0.0385887	54440/916/3662	3
GO:0032640	GO:0032640	tumor necrosis factor production	6/209	129/18493	0.00348934	0.0451391	0.0393226	5788/914/6504/54440/1191/6363	6
GO:0002705	GO:0002705	positive regulation of leukocyte mediated immunity	6/209	131/18493	0.00376351	0.0482131	0.0420005	5788/3594/54440/10666/114836/4068	6
GO:1903555	GO:1903555	regulation of tumor necrosis factor superfamily cytokine production	6/209	131/18493	0.00376351	0.0482131	0.0420005	5788/914/6504/54440/1191/6363	6
GO:1904292	GO:1904292	regulation of ERAD pathway	3/209	28/18493	0.00378484	0.0482521	0.0420345	91319/857/258010	3
