# Supplementary material for: Comprehensive characterization of the tumor microenvironment for assessing immunotherapy outcome in patients with head and neck squamous cell carcinoma
Source: Aging (Albany NY). 2020 Nov 18;12(22):22509–26. doi: 10.18632/aging.103460 (PMC7746351; doi:10.18632/aging.103460)
Supplement: Supplementary Table 4 [file aging-12-103460-s005..xlsx]

## Sheet: TMEscore_high
Arm	# Genes	Amp frequency	Amp frequency score	Amp z-score	Amp q-value	Del frequency	Del frequency score	Del z-score	Del q-value
1p	2121	0.16	0.18	0.718	0.543	0.13	0.16	-0.283	1
1q	1955	0.29	0.31	4.95	2.39e-06	0.06	0.08	-3.11	1
2p	924	0.23	0.24	-0.111	1	0.03	0.04	-6.02	1
2q	1556	0.16	0.17	-1.06	1	0.07	0.09	-3.77	1
3p	1062	0.12	0.27	0.82	0.502	0.57	0.65	13.3	0
3q	1139	0.6	0.62	13.4	0	0.03	0.08	-3.24	1
4p	489	0.07	0.1	-4.55	1	0.36	0.38	3.34	0.00179
4q	1049	0.06	0.09	-4.28	1	0.3	0.32	2.9	0.00651
5p	270	0.44	0.49	6.21	2.51e-09	0.1	0.18	-2.72	1
5q	1427	0.11	0.17	-1.25	1	0.33	0.37	5.51	1.14e-07
6p	1173	0.14	0.17	-1.78	1	0.16	0.19	-1.36	1
6q	839	0.12	0.14	-3.29	1	0.16	0.18	-2.21	1
7p	641	0.34	0.36	2.99	0.00549	0.04	0.06	-5.39	1
7q	1277	0.25	0.27	1.67	0.131	0.08	0.11	-3.33	1
8p	580	0.25	0.41	3.72	0.000427	0.4	0.53	7.61	1.72e-13
8q	859	0.62	0.65	13.1	0	0.05	0.12	-2.67	1
9p	422	0.23	0.37	2.36	0.0323	0.38	0.5	6.24	1.69e-09
9q	1113	0.31	0.37	4.35	3.3e-05	0.15	0.22	-0.411	1
10p	409	0.08	0.12	-4.4	1	0.32	0.35	2.04	0.0576
10q	1268	0.06	0.08	-4.29	1	0.28	0.3	2.59	0.0157
11p	862	0.13	0.18	-1.96	1	0.3	0.34	2.95	0.00627
11q	1515	0.18	0.29	2.32	0.0332	0.38	0.46	8.41	0
12p	575	0.31	0.34	2.15	0.0471	0.08	0.12	-4.03	1
12q	1447	0.19	0.21	0.035	0.998	0.09	0.11	-3.21	1
13q	654	0.11	0.17	-2.53	1	0.36	0.4	4.39	3.15e-05
14q	1341	0.3	0.35	4.43	2.64e-05	0.15	0.21	-0.0929	1
15q	1355	0.12	0.16	-1.67	1	0.25	0.28	2.21	0.0402
16p	872	0.21	0.24	-0.323	1	0.1	0.12	-3.7	1
16q	702	0.21	0.24	-0.644	1	0.12	0.15	-3.15	1
17p	683	0.12	0.14	-3.53	1	0.19	0.21	-1.55	1
17q	1592	0.19	0.21	0.235	0.882	0.07	0.09	-3.71	1
18p	143	0.23	0.3	-0.0803	1	0.22	0.29	-0.2	1
18q	446	0.07	0.14	-3.44	1	0.45	0.48	6.52	3.43e-10
19p	995	0.1	0.12	-3.52	1	0.21	0.23	-0.223	1
19q	1709	0.14	0.17	-0.706	1	0.18	0.21	0.521	0.783
20p	355	0.42	0.47	5.63	6.95e-08	0.1	0.17	-2.82	1
20q	753	0.44	0.47	7.02	1.47e-11	0.06	0.11	-3.68	1
21q	509	0.05	0.08	-4.86	1	0.39	0.41	4.34	3.45e-05
22q	921	0.23	0.27	0.847	0.502	0.16	0.21	-1.16	1

## Sheet: TMEscore_low
Supplementary Table 4. Ampliﬁcation and deletion of chromosomes in the high and low TME score groups.
Arm	# Genes	Amp frequency	Amp frequency score	Amp z-score	Amp q-value	Del frequency	Del frequency score	Del z-score	Del q-value
1p	2121	0.12	0.13	0.129	0.875	0.11	0.12	-0.531	1
1q	1955	0.23	0.24	4.56	1.44e-05	0.06	0.08	-2.84	1
2p	924	0.17	0.18	-1.7	1	0.06	0.07	-5.53	1
2q	1556	0.13	0.14	-1.46	1	0.06	0.07	-4.19	1
3p	1062	0.1	0.22	0.205	0.875	0.55	0.61	15.4	0
3q	1139	0.54	0.56	14.4	0	0.04	0.08	-3.49	1
4p	489	0.08	0.13	-3.74	1	0.4	0.43	6.55	1.88e-10
4q	1049	0.08	0.11	-3.7	1	0.27	0.3	3.25	0.00229
5p	270	0.38	0.41	4.88	4.08e-06	0.07	0.11	-4.69	1
5q	1427	0.11	0.16	-0.908	1	0.31	0.35	6.61	1.53e-10
6p	1173	0.18	0.21	0.155	0.875	0.14	0.17	-1.29	1
6q	839	0.11	0.13	-3.65	1	0.13	0.14	-3.15	1
7p	641	0.36	0.38	5.19	1.02e-06	0.05	0.09	-4.87	1
7q	1277	0.22	0.24	1.85	0.104	0.11	0.14	-1.9	1
8p	580	0.22	0.33	2.46	0.0268	0.32	0.41	5.41	1.56e-07
8q	859	0.61	0.63	15.7	0	0.03	0.08	-3.53	1
9p	422	0.19	0.31	1.35	0.264	0.38	0.47	7.07	7.68e-12
9q	1113	0.26	0.31	3.71	0.000501	0.14	0.19	-0.526	1
10p	409	0.08	0.12	-4.43	1	0.3	0.33	2.5	0.0201
10q	1268	0.07	0.09	-3.89	1	0.2	0.22	0.967	0.434
11p	862	0.11	0.15	-2.46	1	0.27	0.3	2.73	0.0112
11q	1515	0.12	0.19	0.34	0.85	0.36	0.41	9.3	0
12p	575	0.28	0.31	2.11	0.0617	0.07	0.1	-4.92	1
12q	1447	0.14	0.15	-1.4	1	0.07	0.08	-4.07	1
13q	654	0.13	0.19	-1.77	1	0.32	0.36	4.37	2.68e-05
14q	1341	0.3	0.32	5.36	5.5e-07	0.09	0.12	-2.35	1
15q	1355	0.15	0.19	-0.0648	0.914	0.2	0.24	1.97	0.0684
16p	872	0.19	0.22	-0.0984	0.914	0.14	0.17	-2.09	1
16q	702	0.19	0.23	-0.428	1	0.16	0.2	-1.27	1
17p	683	0.12	0.16	-2.92	1	0.2	0.23	-0.263	1
17q	1592	0.17	0.18	0.331	0.85	0.07	0.08	-3.72	1
18p	143	0.25	0.3	0.694	0.634	0.18	0.24	-1.39	1
18q	446	0.11	0.18	-2.19	1	0.42	0.47	7.54	3.06e-13
19p	995	0.1	0.13	-3.09	1	0.22	0.24	0.869	0.469
19q	1709	0.13	0.16	-0.0648	0.914	0.19	0.21	2.14	0.0485
20p	355	0.32	0.36	3.52	0.000951	0.11	0.16	-3.18	1
20q	753	0.34	0.35	4.57	1.44e-05	0.04	0.07	-5.36	1
21q	509	0.08	0.13	-3.76	1	0.38	0.41	5.65	4.36e-08
22q	921	0.22	0.25	0.947	0.478	0.12	0.15	-2.57	1
