# Supplementary material for: Comprehensive characterization of the tumor microenvironment for assessing immunotherapy outcome in patients with head and neck squamous cell carcinoma
Source: Aging (Albany NY). 2020 Nov 18;12(22):22509–26. doi: 10.18632/aging.103460 (PMC7746351; doi:10.18632/aging.103460)
Supplement: Supplementary Table 5 [file aging-12-103460-s006..xlsx]

## Sheet: annotation_all
Supplementary Table 5. Tumor purity and malignant cell ploidy, TMB (tumor mutation burden) and clinical information (age, grade and OS status) pertaining to HNSCC samples.
	AGE	SEX	GRADE	OS_MONTHS	OS_STATUS	score	group	TMEcluster	purity	ploidy	TMB
TCGA-F7-A624-01	73	Male	G3	12.42	0	-0.51853	low	3	0.96	4.1	2703
TCGA-D6-6516-01	69	Male	G2	25.39	0	0.873411	high	1	0.49	3.29	1458
TCGA-CR-7402-01	68	Male	G2	29.93	0	-0.0899312	low	3	0.4	4.07	772
TCGA-CN-4723-01	67	Male	G2	55.81	0	0.70573	high	1	1	4.05	752
TCGA-CR-7388-01	70	Female	G2	27.04	1	0.54485	high	3	0.4	4.01	608
TCGA-CV-A45Z-01	75	Male	G3	48.16	1	0.486328	high	2	0.22	3.5	573
TCGA-BA-A6DA-01	41	Female	G2	11.53	0	-0.167726	low	3	0.92	4.07	548
TCGA-CV-A6K2-01	79	Male	G1	10.41	1	-0.943559	low	1	0.71	3.99	568
TCGA-CV-A45W-01	75	Male	G2	45.93	1	0.135394	low	3	0.37	4.14	502
TCGA-TN-A7HL-01	59	Male	G2	20.34	0	0.0568007	low	1	0.76	4	524
TCGA-CV-A461-01	65	Male	G2	67.81	1	0.732291	high	1	0.67	4.04	467
TCGA-KU-A66S-01	69	Female	G2	13.34	1	-1.84825	low	2	0.32	4.21	472
TCGA-CV-6961-01	61	Male	G3	2.5	1	0.177959	low	1	0.75	2.93	499
TCGA-CN-A63U-01	50	Male	G3	31.67	0	1.65859	high	3	0.57	3.33	431
TCGA-QK-A6VB-01	66	Male	G2	21.06	0	0.566772	high	2	0.72	3.27	337
TCGA-CV-A6K1-01	65	Male	G2	22.5	0	0.0664844	low	3	0.64	1.87	368
TCGA-CR-7370-01	72	Female	G2	3.45	0	-0.0314839	low	3	0.48	6.7	432
TCGA-CN-5360-01	68	Male	G2	71.25	0	0.590157	high	3	0.71	2.73	411
TCGA-CN-5369-01	90	Female	G3	12.48	1	-1.36445	low	1	NA	NA	372
TCGA-CV-7245-01	62	Male	G2	26.18	0	-0.299903	low	2	0.61	3.24	408
TCGA-BA-5152-01	56	Male	G2	42.31	0	0.307256	high	1	0.29	3.46	430
TCGA-CR-6481-01	47	Male	G2	10.22	0	-0.0624038	low	3	0.43	3.9	430
TCGA-CV-A468-01	42	Male	G2	15.24	1	1.47342	high	3	0.45	2	418
TCGA-CQ-7071-01	76	Female	G2	43.07	0	0.850899	high	1	0.54	2	411
TCGA-CR-6472-01	59	Male	G3	34.49	0	0.39931	high	3	0.51	3.53	390
TCGA-BA-6869-01	62	Male	G2	21.16	0	1.09863	high	1	0.38	4.1	373
TCGA-CR-7364-01	66	Male	G2	47.14	0	0.999501	high	3	0.82	3.88	369
TCGA-UF-A71D-01	54	Female	G2	48	0	0.648518	high	3	0.26	3.78	349
TCGA-CN-4727-01	56	Male	G2	51.25	0	1.14633	high	1	0.47	3.24	350
TCGA-BA-4078-01	83	Male	G2	9.07	1	2.79213e-05	low	1	0.79	1.76	345
TCGA-CV-7427-01	73	Female	G1	156.37	1	1.27871	high	1	1	4.06	382
TCGA-D6-A74Q-01	67	Male	G3	23.32	0	-1.4476	low	3	0.42	3.65	347
TCGA-CN-A63W-01	48	Female	G2	12.39	1	-1.88209	low	2	0.22	3.26	319
TCGA-CV-5441-01	58	Male	G3	94.81	0	-0.77314	low	2	0.44	3.8	298
TCGA-P3-A5QF-01	49	Male	G2	10.84	1	0.265044	high	1	0.84	1.97	324
TCGA-QK-A8Z8-01	60	Female	G2	5.62	1	-0.122453	low	3	0.72	1.91	299
TCGA-CN-5356-01	56	Male	G2	46.29	0	-0.127141	low	3	0.48	4.5	288
TCGA-CR-7374-01	67	Female	G2	0.99	0	-0.376601	low	3	0.74	2.71	307
TCGA-T2-A6X2-01	82	Male	G1	32.42	0	-0.0958088	low	1	0.48	4.24	308
TCGA-T3-A92M-01	52	Male	G2	13.7	0	-0.70498	low	1	0.51	3.9	304
TCGA-CN-A497-01	63	Male	G2	34.99	0	-0.353764	low	1	0.85	2.96	275
TCGA-CN-6011-01	57	Male	G3	30.65	0	-0.892935	low	1	0.59	2.78	296
TCGA-CR-5248-01	53	Male	G3	54.63	0	1.04044	high	3	0.98	3.85	285
TCGA-BA-4076-01	39	Male	G2	13.63	1	1.50935	high	2	0.63	3.96	275
TCGA-CR-7398-01	53	Female	G2	5.12	0	-0.0234138	low	1	0.51	3.73	271
TCGA-CN-6992-01	61	Male	G2	35.02	0	-1.37048	low	3	0.5	3.76	271
TCGA-BB-4223-01	48	Male	G3	105.81	0	1.32491	high	3	0.54	4.44	278
TCGA-MT-A67F-01	60	Female	G2	12.61	0	-2.56673	low	1	0.57	2.01	288
TCGA-DQ-5629-01	64	Male	G2	30.91	1	-0.558155	low	1	0.31	5.39	255
TCGA-BA-4077-01	45	Female	G2	37.25	1	-1.43134	low	1	0.41	3.2	262
TCGA-CV-7242-01	60	Female	G2	35.97	0	0.835712	high	3	0.25	3.66	254
TCGA-F7-7848-01	47	Male	G2	37.16	0	0.252602	high	1	0.68	2.82	245
TCGA-CN-6021-01	63	Female	G2	9.07	1	-1.1882	low	3	0.64	2.86	228
TCGA-CV-7099-01	85	Female	G2	7.98	1	-1.26426	low	2	0.83	4.02	244
TCGA-CV-7248-01	63	Female	G2	17.12	1	0.684759	high	3	0.52	3.78	239
TCGA-CR-7371-01	45	Female	G2	3.09	1	-0.52099	low	1	0.51	3.79	238
TCGA-CR-7399-01	60	Female	G3	5.95	0	1.28453	high	1	0.61	3.94	229
TCGA-BA-A6DJ-01	62	Male	G2	13.37	1	0.552678	high	1	0.36	4.09	239
TCGA-P3-A5Q5-01	54	Male	G3	29.89	0	-1.33541	low	3	1	4.1	244
TCGA-CV-A45Q-01	69	Female	G1	169.25	1	0.882019	high	2	1	4.12	227
TCGA-CR-6484-01	67	Female	G2	11.63	0	0.839869	high	2	0.33	3.78	235
TCGA-CV-5432-01	68	Male	G3	129.11	0	-0.201143	low	3	0.35	5.4	219
TCGA-CV-6936-01	68	Male	G2	5.45	1	-1.15469	low	3	0.6	2.22	220
TCGA-CV-7414-01	78	Male	G2	0.46	1	0.00143601	low	1	0.81	1.97	224
TCGA-CV-A6JM-01	85	Male	G2	6.37	1	-2.50076	low	2	0.33	5.24	214
TCGA-CV-5442-01	76	Female	G3	76.45	0	0.404693	high	2	0.38	2.95	213
TCGA-CV-7254-01	55	Male	G3	47.93	1	0.252234	high	3	0.22	4.48	204
TCGA-CN-A63T-01	60	Male	G3	7.39	0	0.635633	high	1	0.8	4.04	206
TCGA-UF-A7J9-01	75	Male	G2	44.61	0	0.744991	high	2	0.66	3.85	205
TCGA-UF-A7JA-01	66	Female	G2	74.41	0	-0.230801	low	2	0.26	2.84	217
TCGA-BB-4227-01	66	Male	G2	4.4	0	-1.92336	low	1	0.68	1.96	204
TCGA-CV-7095-01	87	Female	G2	18.79	1	0.788097	high	1	0.25	3.83	204
TCGA-CQ-5327-01	61	Female	G2	54.53	0	-0.715821	low	1	0.37	3.97	190
TCGA-CX-7086-01	53	Male	G2	18.82	0	0.452868	high	1	0.62	3.28	196
TCGA-CV-6441-01	60	Male	G3	9.59	1	-0.127374	low	1	0.69	3.59	186
TCGA-CN-A6V3-01	61	Male	G3	24.38	0	0.423157	high	3	0.57	4.16	192
TCGA-CV-6935-01	67	Male	G3	9.69	1	0.885421	high	2	0.6	3.69	187
TCGA-P3-A6T5-01	79	Female	G2	28.98	1	0.868056	high	2	0.47	3.93	192
TCGA-CV-7440-01	38	Male	GX	22.17	1	-0.0450892	low	2	0.53	4.39	175
TCGA-CN-6995-01	78	Male	G2	3.68	1	1.07604	high	1	0.68	3.01	185
TCGA-BB-A5HY-01	64	Male	G3	10.55	1	0.472601	high	2	0.83	3.72	176
TCGA-CV-6942-01	73	Female	G3	140.67	0	-0.384152	low	1	0.28	3.89	186
TCGA-CV-7252-01	62	Female	G2	4.96	1	-0.845853	low	3	0.89	3.92	176
TCGA-CN-A641-01	47	Male	G2	12.06	0	-0.812919	low	1	0.67	1.98	180
TCGA-CN-4739-01	71	Male	G2	45.8	1	-1.71121	low	3	0.29	3.66	171
TCGA-QK-A6VC-01	62	Female	G2	19.71	0	0.699081	high	1	0.43	9.29	185
TCGA-CQ-5333-01	74	Male	G3	11.2	1	-0.90002	low	1	NA	NA	178
TCGA-CR-7368-01	54	Male	G2	40.9	0	-2.00703	low	1	0.39	3.04	172
TCGA-CV-A463-01	82	Female	G2	0.76	1	-0.600284	low	3	0.36	4.34	183
TCGA-CQ-5326-01	67	Male	G3	2.92	1	-1.3213	low	2	0.81	3.92	175
TCGA-DQ-5625-01	52	Female	G2	37.22	1	1.21127	high	1	0.5	3.48	164
TCGA-CV-5970-01	59	Male	G2	13.34	1	-1.19748	low	1	0.53	4.25	166
TCGA-HD-8635-01	61	Female	G2	22.83	0	2.26538	high	2	0.62	2.93	166
TCGA-CN-6013-01	56	Male	G3	23.88	1	-0.260817	low	1	0.57	3.33	164
TCGA-CV-7101-01	80	Male	G2	5.26	1	0.735661	high	3	0.37	3.21	162
TCGA-CV-7250-01	64	Male	G1	95.27	1	-0.75063	low	1	0.57	2.22	159
TCGA-CV-A45U-01	59	Male	G1	35.45	1	0.554503	high	1	0.46	4.42	167
TCGA-UF-A71A-01	67	Male	G1	2.83	1	1.05996	high	2	0.59	3.29	159
TCGA-CV-6948-01	79	Female	G2	42.35	1	0.632925	high	2	0.48	7.28	153
TCGA-CV-7253-01	58	Male	G2	11.86	1	-0.256048	low	1	0.57	4.02	154
TCGA-IQ-A61E-01	55	Female	G2	37.68	0	0.447763	high	1	0.37	3.94	167
TCGA-HD-A4C1-01	41	Female	G1	0.36	0	1.15051	high	1	0.49	4.02	162
TCGA-T2-A6WX-01	73	Female	G1	6.87	1	0.373161	high	1	0.65	4.11	167
TCGA-CV-7424-01	67	Male	G2	14.88	1	0.453462	high	3	0.25	4.17	161
TCGA-D6-A6ES-01	50	Male	G2	12.78	0	0.23515	high	2	0.68	1.98	163
TCGA-CQ-5334-01	87	Male	G2	4.24	1	0.213054	low	1	0.59	4.14	153
TCGA-CV-7406-01	49	Male	GX	57.42	1	-0.971871	low	2	0.8	3.01	150
TCGA-D6-A4ZB-01	61	Male	G2	12.35	0	0.523119	high	3	0.74	3.96	166
TCGA-F7-A623-01	70	Male	G1	20.24	0	1.72393	high	3	0.55	5.04	151
TCGA-UF-A7JT-01	72	Female	G3	32.62	1	2.00848	high	1	0.75	4.06	164
TCGA-UF-A71A-06	67	Male	G1	2.83	1	-1.70403	low	1	0.35	5.37	153
TCGA-CN-5363-01	48	Male	G3	8.31	1	1.29519	high	1	0.88	8.86	138
TCGA-P3-A6SX-01	67	Male	G2	46.98	1	-1.05255	low	2	0.43	3.97	153
TCGA-CV-5978-01	53	Female	G2	7.06	1	0.912427	high	2	0.46	4.04	145
TCGA-RS-A6TO-01	82	Female	G2	12.71	1	0.14807	low	2	0.51	4.66	147
TCGA-CV-6956-01	67	Male	G2	7.13	1	-0.684403	low	2	0.58	3.81	145
TCGA-CN-4730-01	62	Male	G2	26.84	0	0.223785	low	2	0.6	3.92	149
TCGA-CV-6960-01	49	Male	G3	28.32	1	1.16135	high	2	0.95	2.88	139
TCGA-BA-6872-01	47	Male	G2	12.61	1	-0.317292	low	2	0.44	3.27	144
TCGA-CR-7386-01	69	Male	G1	46.98	0	1.34863	high	1	0.43	4	156
TCGA-UF-A7JO-01	79	Female	G2	20.73	1	-0.421181	low	1	0.25	3.83	139
TCGA-BB-A5HU-01	47	Male	G2	25.69	0	0.272457	high	2	0.44	4.34	158
TCGA-CV-7418-01	62	Male	G2	25.92	1	-1.51289	low	3	0.53	3.72	139
TCGA-CR-7367-01	52	Male	G1	47.31	0	0.779146	high	1	0.29	3.42	146
TCGA-QK-A6II-01	52	Male	G2	9.33	1	-2.71659	low	2	0.4	4.26	135
TCGA-CR-7365-01	60	Male	G2	39.13	0	-0.87896	low	2	0.49	3.5	139
TCGA-CR-7394-01	70	Male	G2	44.22	0	-0.179109	low	1	NA	NA	148
TCGA-CV-7089-01	74	Male	G2	64.78	1	0.595396	high	1	0.38	4.01	144
TCGA-F7-A50J-01	67	Female	G2	31.11	0	-2.46429	low	1	0.73	2.18	141
TCGA-CN-4741-01	75	Male	G2	73.55	0	0.298667	high	3	0.68	4.34	149
TCGA-CN-5374-01	56	Female	G3	56.9	1	0.0858586	low	1	0.32	2.66	150
TCGA-CV-6952-01	65	Female	G1	6.08	1	0.241483	high	1	0.32	4.09	141
TCGA-CN-6010-01	53	Male	G2	50.03	0	0.495266	high	3	0.25	3.65	139
TCGA-CV-6954-01	59	Male	G2	65.77	1	0.121086	low	1	0.59	4.05	136
TCGA-D6-A6EK-01	67	Male	G1	28.75	0	0.00986791	low	3	0.92	4.1	136
TCGA-CN-4740-01	79	Female	G2	27.56	1	-0.542063	low	2	0.27	4.11	136
TCGA-KU-A6H7-01	55	Female	G2	19.25	0	-1.98168	low	1	0.37	3.75	143
TCGA-CN-5373-01	55	Female	G1	52.04	0	1.84351	high	1	0.67	4.02	128
TCGA-CV-5430-01	61	Male	G3	139.32	0	-1.24892	low	1	0.46	3.55	118
TCGA-CV-6962-01	65	Male	G2	4.14	1	-0.258762	low	2	0.5	6.04	125
TCGA-P3-A6T4-01	54	Male	G2	2.04	1	1.34336	high	1	0.39	3.31	135
TCGA-T3-A92N-01	79	Male	G3	3.12	1	0.718958	high	1	0.81	4.01	135
TCGA-CQ-6225-01	65	Male	G2	13.24	1	-0.316601	low	2	0.63	3.18	117
TCGA-CR-7395-01	80	Female	G2	30.55	0	-0.455437	low	1	0.74	4.01	130
TCGA-HD-7229-01	60	Male	G3	33.74	0	1.12693	high	1	0.77	3.16	136
TCGA-CN-5359-01	59	Male	G2	12.39	1	0.458055	high	1	0.18	3.29	128
TCGA-CV-A45O-01	57	Male	G2	27.96	0	1.35244	high	1	0.41	4	144
TCGA-MZ-A7D7-01	51	Male		17.97	0	0.92993	high	1	0.26	3.76	135
TCGA-CV-6938-01	87	Male	G1	4.73	1	0.905313	high	1	0.27	2	124
TCGA-QK-A8Z7-01	59	Male		12.88	0	0.635089	high	2	0.65	8.29	132
TCGA-CV-5434-01	60	Male	G2	108.87	1	1.21392	high	2	0.5	3.05	122
TCGA-BA-A8YP-01	50	Male	G2	16.39	0	-0.573705	low	1	0.43	6.31	125
TCGA-CN-4735-01	52	Male	G3	57.06	0	0.79813	high	2	1	2.87	133
TCGA-CQ-5331-01	73	Female	G2	45.96	0	0.0134738	low	1	0.35	4.05	138
TCGA-CV-7432-01	79	Male	G1	84.43	1	0.922642	high	1	0.55	3.68	127
TCGA-BA-5555-01	54	Male	G2	17.08	0	-1.05612	low	1	0.46	4.17	128
TCGA-CV-A45P-01	82	Female	G2	20.99	0	1.61654	high	2	NA	NA	133
TCGA-CN-6024-01	66	Male	G2	11.07	1	0.137836	low	2	0.53	2.95	118
TCGA-CX-7085-01	77	Female	G2	10.55	0	0.0853494	low	3	NA	NA	136
TCGA-UF-A71E-01	63	Male	G3	49.41	1	1.10603	high	3	0.69	3.89	132
TCGA-BA-6868-01	53	Male	G2	15.51	1	-0.334651	low	2	0.85	4.84	125
TCGA-CN-6988-01	47	Male	G3	10.45	0	1.80695	high	2	0.63	3.13	126
TCGA-CQ-A4CD-01	69	Male	G3	33.57	0	-1.66386	low	1	0.62	3.08	130
TCGA-UF-A71B-01	50	Male	G2	49.47	0	0.857194	high	2	0.66	2.92	126
TCGA-IQ-A61H-01	76	Male	G2	37.39	0	0.163666	low	2	0.73	3.92	125
TCGA-BA-4074-01	69	Male	G3	15.18	1	0.335441	high	1	1	3.81	121
TCGA-CN-6020-01	58	Male	G2	6.73	1	0.408826	high	2	0.35	4.04	126
TCGA-H7-8501-01	54	Male	GX	15.14	0	-0.452008	low	1	0.71	4.03	129
TCGA-BA-5556-01	58	Female	G3	23.82	0	-0.394967	low	1	0.83	2	120
TCGA-BA-5558-01	65	Male	G1	65.54	0	0.0681722	low	1	0.54	3.03	124
TCGA-CN-4728-01	56	Male	G2	56.64	0	-0.212281	low	2	0.35	3.57	119
TCGA-H7-7774-01	75	Female	G2	13.37	0	1.48133	high	1	0.58	2.09	124
TCGA-F7-A50I-01	72	Male	G2	3.02	0	-0.378848	low	1	0.31	3.87	122
TCGA-BA-6871-01	75	Male	G2	3.55	1	-0.50114	low	1	0.61	2.89	120
TCGA-CN-5364-01	55	Male	G2	16.2	1	-0.182475	low	2	0.71	4.03	122
TCGA-CN-6019-01	61	Male	G2	34.1	0	0.351185	high	2	0.38	3.79	116
TCGA-CR-7383-01	79	Female	G2	17.12	1	-1.32812	low	1	0.31	3.17	100
TCGA-IQ-A61G-01	57	Male	G2	11.83	0	-1.57045	low	2	0.74	2.72	121
TCGA-CQ-5332-01	87	Male	G2	10.41	1	-0.163853	low	2	0.3	3.48	118
TCGA-CV-7102-01	76	Female	G3	1.84	1	-0.356496	low	2	0.46	3.23	121
TCGA-CN-6997-01	66	Male	G3	32.46	1	0.541923	high	3	0.76	1.77	118
TCGA-CV-7091-01	54	Male	G3	111.07	0	-0.0739071	low	2	0.5	3.9	111
TCGA-P3-A6T7-01	55	Male	G2	16	1	0.902104	high	2	0.56	3.02	112
TCGA-CN-4729-01	73	Male	G2	12.88	0	-1.87677	low	1	0.85	8.71	109
TCGA-CR-6471-01	58	Male	G2	39.49	1	-0.435236	low	1	0.83	4.09	118
TCGA-UF-A719-01	54	Male	G1	54.63	0	-0.779293	low	1	0.23	5.73	105
TCGA-CR-6491-01	60	Male	G2	22.77	0	-0.462503	low	3	0.5	3.96	109
TCGA-CV-5436-01	65	Male	G2	19.19	1	-0.256734	low	1	0.6	2.14	84
TCGA-CV-6941-01	51	Male	G2	11.24	1	0.487429	high	1	0.27	4.16	116
TCGA-HD-A633-01	74	Male	G2	13.83	0	0.141996	low	2	0.9	2.95	111
TCGA-CQ-7072-01	51	Male	G3	77.5	0	1.86387	high	2	0.38	3.21	113
TCGA-CQ-7063-01	59	Female	G1	70.07	0	-0.537377	low	1	0.44	2.11	115
TCGA-CV-5444-01	64	Male	G3	80.06	0	0.0863051	low	1	0.37	5.4	107
TCGA-CV-7422-01	60	Female	G3	34.07	1	-0.73104	low	2	0.3	4.14	111
TCGA-CV-A6JE-01	78	Male	G2	35.32	0	0.949185	high	1	0.46	3.25	113
TCGA-CV-A6JU-01	61	Female	G2	3.61	0	0.769255	high	1	0.66	3.91	105
TCGA-IQ-A61I-01	63	Male	G3	0.07	1	0.115173	low	3	0.75	1.93	117
TCGA-CR-6487-01	50	Male	G3	7.69	0	-0.0287289	low	3	0.53	4.08	112
TCGA-CV-6940-01	80	Female	G2	26.41	1	0.0102349	low	2	0.58	3.7	115
TCGA-CV-7437-01	77	Male	GX	16.62	1	0.366364	high	1	0.79	3.66	112
TCGA-P3-A6T6-01	53	Male	G3	12.98	1	-0.15588	low	3	0.58	4.05	115
TCGA-RS-A6TP-01	58	Male	G3	16.95	0	-0.606015	low	2	0.66	3.99	113
TCGA-CR-7379-01	78	Female	G2	34.03	0	-0.195646	low	2	0.37	4.27	114
TCGA-F7-8489-01	48	Male	G1	21.62	0	-0.0442929	low	1	0.67	2.02	113
TCGA-CN-5355-01	64	Male	G2	41.98	0	0.288667	high	3	0.91	3.95	95
TCGA-CV-6951-01	57	Male	G2	30.06	1	0.0127633	low	1	0.79	4.27	110
TCGA-CV-7235-01	67	Male	G3	77.1	0	-0.10146	low	1	0.52	3.96	109
TCGA-4P-AA8J-01	66	Male	G2	3.35	0	-1.34776	low	3	0.58	3.96	99
TCGA-CV-6937-01	71	Male	G2	20.5	1	-0.581345	low	2	0.23	2.59	111
TCGA-BA-A6D8-01	59	Male	G2	27.92	0	1.88709	high	2	0.52	3.53	102
TCGA-CV-6955-01	74	Female	G3	10.97	1	-0.274453	low	1	0.74	3.99	103
TCGA-BA-A6DE-01	70	Female	G2	14.45	0	-2.4308	low	2	0.66	1.81	99
TCGA-CN-6012-01	66	Male	G2	47.96	0	0.302808	high	3	0.65	2.66	103
TCGA-IQ-7630-01	49	Male	G3	15.93	0	0.842733	high	1	0.4	4.12	107
TCGA-CV-5440-01	52	Male	G3	107.42	0	-1.43077	low	2	0.59	3.43	97
TCGA-TN-A7HJ-01	51	Male	G2	13.24	0	-1.96937	low	3	0.31	4.22	102
TCGA-CN-4731-01	63	Female	G3	32.79	1	0.835668	high	2	0.93	3.04	90
TCGA-CV-7177-01	82	Female	G2	21.78	1	1.72261	high	2	0.87	3.09	98
TCGA-QK-A8ZA-01	60	Male	G2	12.19	1	0.142037	low	1	0.67	8.37	107
TCGA-CN-6023-01	73	Male	GX	52.04	0	-0.118361	low	3	0.33	2.73	96
TCGA-CQ-6218-01	52	Female	G2	41.16	0	0.000949461	low	1	0.51	1.94	104
TCGA-CR-7377-01	58	Male	G3	9.17	1	-1.1197	low	1	0.42	4.01	103
TCGA-CV-5435-01	57	Male	G3	76.18	1	0.770888	high	2	0.55	3.7	88
TCGA-CV-7407-01	67	Female	G2	35.51	1	-0.387916	low	1	0.5	4.57	104
TCGA-D6-A6EP-01	62	Male	G3	13.93	0	-0.660841	low	3	0.74	8.3	105
TCGA-P3-A5Q6-01	49	Male	G3	15.77	1	-1.67251	low	1	0.55	3.73	105
TCGA-QK-A6IG-01	69	Male	G2	7.29	1	-0.326356	low	1	0.35	8.59	108
TCGA-QK-AA3J-01	69	Male	G3	15.31	0	1.16659	high	3	0.59	3.89	106
TCGA-CV-6945-01	41	Male	G2	12.02	1	0.931831	high	2	0.36	3.42	92
TCGA-MT-A67A-01	85	Female	G2	30.03	0	-0.331765	low	3	0.5	2.19	102
TCGA-QK-A8Z9-01	56	Male	G2	14.75	1	0.281016	high	3	0.48	4.02	104
TCGA-CN-A498-01	61	Female	G1	25.39	1	0.293733	high	3	0.71	2.98	101
TCGA-CV-7433-01	49	Male	G3	19.74	1	0.155697	low	1	0.19	3.13	103
TCGA-BA-A6DL-01	59	Male	G2	20.47	0	-2.07004	low	3	0.38	3.48	93
TCGA-CN-6016-01	64	Male	G2	47.4	0	0.161899	low	2	0.43	4.02	102
TCGA-CR-6478-01	66	Female	G3	6.01	1	0.755835	high	1	0.25	3.27	99
TCGA-CR-7390-01	67	Male	G2	49.54	0	0.0948671	low	2	0.45	3.53	102
TCGA-CV-7178-01	64	Female	G3	71.16	1	0.522087	high	2	0.51	3.7	101
TCGA-D6-8569-01	52	Male	G2	25.3	0	0.407255	high	1	0.54	4.39	99
TCGA-CQ-6221-01	79	Male	G3	32.85	0	-1.58976	low	2	0.86	2.87	92
TCGA-CV-7261-01	57	Male	G2	49.67	0	0.371923	high	1	0.5	3.22	101
TCGA-CQ-6228-01	71	Female	G2	14.98	1	-0.221674	low	2	0.61	3.93	102
TCGA-CV-6933-01	53	Male	G2	90.05	1	-0.632433	low	2	0.45	3.5	100
TCGA-F7-A61S-01	62	Male	G1	18.92	0	1.21454	high	1	0.67	3.06	95
TCGA-P3-A6T3-01	49	Male	G2	18.96	1	-3.26042	low	2	0.56	3.31	107
TCGA-QK-A8ZB-01	68	Male	G2	17.81	0	0.193046	low	3	0.75	3.81	98
TCGA-UF-A7JD-01	71	Male	G3	24.28	1	0.518476	high	2	0.47	3.96	94
TCGA-BA-A4IG-01	77	Male	G3	28.09	0	1.1009	high	3	0.4	3.84	100
TCGA-CN-6994-01	67	Male	G2	38.86	0	0.294883	high	2	0.51	3.77	98
TCGA-CR-7404-01	53	Male	G2	48.36	0	-1.33006	low	1	0.49	4.03	102
TCGA-CV-5966-01	63	Female	G3	17.9	1	-0.115218	low	1	0.27	3.97	95
TCGA-CV-7263-01	64	Male	G1	18.4	1	0.501368	high	2	0.34	3.71	98
TCGA-CX-7219-01	47	Male	G2	34.33	0	-0.897289	low	1	0.48	4.3	94
TCGA-CN-4736-01	70	Female	G2	12.98	1	1.64514	high	1	0.52	4.03	92
TCGA-CN-A49A-01	60	Male	G2	17.28	1	2.44598	high	2	0.67	4.31	103
TCGA-KU-A66T-01	53	Female	G2	18.13	0	-0.157769	low	1	0.41	3.96	98
TCGA-CN-4738-01	53	Male	G2	14.32	1	-1.08684	low	3	0.54	4.16	91
TCGA-CV-6003-01	50	Female	G2	54.7	0	-0.329361	low	2	0.45	3.48	88
TCGA-CV-7411-01	64	Female	G1	89.26	1	-0.855347	low	2	NA	NA	93
TCGA-D6-8568-01	62	Male	G2	24.93	0	-1.86552	low	1	0.56	4.07	87
TCGA-BA-A6DI-01	62	Male	G2	11.04	1	-0.364733	low	1	0.48	3.78	93
TCGA-CQ-6220-01	69	Male	G2	32.36	1	-0.516562	low	1	0.43	4.01	98
TCGA-CV-7255-01	32	Female	G2	2.1	1	-0.292413	low	2	0.57	4.52	85
TCGA-F7-A61V-01	54	Male	G1	24.93	0	-0.165817	low	3	0.87	3.01	96
TCGA-MT-A67D-01	55	Male	G2	1.84	0	1.59086	high	3	0.48	3.93	96
TCGA-CN-5367-01	60	Female	G2	11.56	1	0.565983	high	2	0.35	4.36	88
TCGA-CR-6474-01	51	Male	G2	18.53	1	0.937619	high	1	0.37	4.11	99
TCGA-CR-6480-01	53	Male	G2	11.89	0	-1.25054	low	3	0.52	4	100
TCGA-CV-6953-01	80	Female	G1	53.91	1	-0.991549	low	3	0.63	4	98
TCGA-CV-7425-01	77	Female	G1	56.44	1	-0.0443059	low	1	0.38	4.08	96
TCGA-CN-5370-01	78	Male	G3	8.51	1	-1.47886	low	1	0.54	3.95	85
TCGA-CV-A6JZ-01	68	Male	G2	23.46	0	0.301581	high	1	0.37	3.29	88
TCGA-CN-5366-01	51	Male	G2	11.83	1	-1.42357	low	1	0.29	4.46	88
TCGA-CQ-A4C6-01	63	Male	G2	44.45	0	0.694996	high	1	0.46	4.26	94
TCGA-CV-7104-01	61	Female	G2	12.91	1	-1.64277	low	1	0.5	1.9	86
TCGA-CV-7430-01	56	Male	G2	16.26	1	0.00141466	low	1	0.75	1.96	83
TCGA-UF-A7JK-01	59	Male	G2	13.93	1	0.217158	low	2	0.85	4.05	94
TCGA-BA-A4IF-01	59	Male	G2	29.4	0	0.650609	high	3	0.41	4.4	88
TCGA-CN-6018-01	85	Female	G2	19.05	1	0.010797	low	2	0.39	3.63	89
TCGA-CN-A49B-01	71	Male	G3	29.7	0	1.19259	high	1	0.65	2.08	94
TCGA-HD-7753-01	62	Male	G2	28.45	0	-0.97451	low	1	0.56	4.16	86
TCGA-UF-A7JF-01	80	Male	G2	55.39	0	-0.558817	low	3	0.76	3.1	86
TCGA-CR-7373-01	66	Male	G2	29.2	0	0.350344	high	1	0.37	3.64	90
TCGA-CV-5439-01	62	Male	G2	17.94	1	-2.67562	low	1	0.35	4.03	85
TCGA-CV-A45V-01	87	Female	G1	1.05	1	0.0132366	low	1	0.78	4.05	87
TCGA-BB-A6UO-01	61	Female	G2	8.8	1	1.04607	high	2	1	3.98	80
TCGA-CR-7389-01	55	Male	G2	12.88	0	0.338461	high	3	0.44	3.6	85
TCGA-D6-6823-01	50	Male	G2	23.03	0	0.470619	high	2	0.38	3.54	85
TCGA-D6-A6EN-01	71	Male	G3	22.57	0	-0.198357	low	1	0.37	4.19	82
TCGA-DQ-5624-01	43	Female	G2	58.41	0	0.664917	high	1	0.24	3.93	95
TCGA-UF-A7JJ-01	68	Male	G1	18.04	0	-0.0548979	low	3	0.44	4.08	85
TCGA-C9-A47Z-01	72	Female	G1	6.27	1	-0.913219	low	1	0.51	2.67	80
TCGA-CN-6989-01	64	Male	G2	32.19	1	1.02561	high	2	0.32	4.63	85
TCGA-CN-A642-01	57	Male	G3	2.69	1	-1.72394	low	1	0.69	2.12	84
TCGA-DQ-7588-01	66	Male	G3	14.03	1	-0.31128	low	2	0.51	3.46	85
TCGA-T2-A6WZ-01	53	Male	G2	15.9	1	0.680583	high	3	0.29	5.31	88
TCGA-BA-A4II-01	46	Male	G1	30.16	0	0.085359	low	1	0.41	3.93	80
TCGA-D6-6826-01	64	Female	G2	11.43	1	1.57375	high	2	0.4	3.69	82
TCGA-P3-A6SW-01	50	Male	G3	36.79	0	-1.30656	low	3	0.42	4.09	86
TCGA-QK-AA3K-01	60	Male	G2	8.31	0	1.73417	high	1	0.45	8.81	79
TCGA-BA-5559-01	71	Male	G3	68.43	1	0.0589612	low	1	0.48	2.95	78
TCGA-CV-7097-01	53	Male	G3	12.65	1	-1.12198	low	2	0.32	3.84	80
TCGA-D6-A6EM-01	65	Female	G2	7.62	0	0.198967	low	1	0.4	3.72	83
TCGA-CQ-7068-01	80	Female	G2	43	0	1.07041	high	1	0.47	4.31	86
TCGA-BA-6870-01	60	Female	G2	14.82	1	1.1953	high	3	0.36	4.66	78
TCGA-CV-7434-01	64	Male	G2	7.16	1	0.596648	high	1	0.91	3.22	82
TCGA-CV-7438-01	87	Female	G3	6.37	1	-0.155832	low	2	0.36	3.77	79
TCGA-P3-A6T0-01	47	Female	G2	18.99	0	0.297837	high	2	0.45	3.84	80
TCGA-CN-5365-01	38	Male	G2	11.53	1	-0.931264	low	1	0.92	3.92	71
TCGA-CQ-A4CB-01	59	Male	G2	29.34	0	-0.347377	low	1	0.67	3.93	80
TCGA-CQ-A4CI-01	73	Male	G3	31.21	0	2.08115	high	2	0.76	1.82	83
TCGA-CR-7380-01	58	Male	G2	19.91	1	-2.00922	low	1	0.35	4.39	80
TCGA-CV-A45X-01	47	Male	G2	6.5	1	0.678155	high	2	0.29	3.45	82
TCGA-CX-A4AQ-01	56	Male	G3	51.08	0	-0.194366	low	3	0.58	2	76
TCGA-CR-6473-01	68	Male	G3	36.96	0	1.60883	high	3	0.8	2.03	82
TCGA-CV-A6JY-01	69	Male	G1	21.22	0	-0.671556	low	3	0.16	1.49	86
TCGA-H7-8502-01	50	Male	G2	15.05	0	2.2293	high	1	0.51	4.08	73
TCGA-BA-7269-01	61	Male	G1	41.82	0	0.971595	high	2	0.63	4.1	79
TCGA-CV-6934-01	66	Female	G2	2.14	1	-0.222281	low	2	0.63	4.03	76
TCGA-CQ-7069-01	77	Female	G2	41.85	0	-1.20609	low	2	0.31	3.15	83
TCGA-F7-8298-01	58	Male	G1	32.69	0	-0.140317	low	2	0.96	4.08	76
TCGA-BA-5151-01	72	Male	G1	23.72	0	-0.880886	low	1	0.73	4.12	75
TCGA-CQ-A4C9-01	56	Male	G2	23.23	0	1.29311	high	3	0.34	3.1	81
TCGA-CV-A6JD-01	82	Female	G3	5.98	1	0.420132	high	1	0.6	2.06	74
TCGA-HD-7832-01	52	Male	G2	27.46	0	0.232866	high	1	0.53	4.44	76
TCGA-CV-5977-01	66	Male	G2	60.45	0	0.677186	high	1	0.74	4.77	73
TCGA-F7-A50G-01	66	Male	G1	20.24	0	1.61765	high	2	0.47	3.69	80
TCGA-CN-4742-01	48	Female	G3	13.04	1	1.37719	high	2	0.43	4.27	73
TCGA-CX-7082-01	82	Male	G2	0.36	1	-2.51548	low	1	0.46	3.73	76
TCGA-D6-A6EO-01	44	Male	G2	24.93	0	0.82408	high	2	0.66	1.99	74
TCGA-DQ-5631-01	52	Male	G3	18	1	0.491834	high	2	0.73	3.99	78
TCGA-P3-A6T8-01	54	Male	G3	13.14	0	-0.264784	low	2	0.32	3.63	69
TCGA-WA-A7H4-01	69	Male	G3	14.55	0	0.388404	high	3	0.41	3.89	77
TCGA-CN-4726-01	68	Male	G2	4.66	1	-0.103659	low	1	0.92	3.95	66
TCGA-CR-6477-01	56	Female	G2	16.89	0	1.01379	high	2	0.25	3.49	68
TCGA-D6-A6EQ-01	57	Male	G3	12.09	0	-1.72571	low	1	0.38	3.92	74
TCGA-HD-8224-01	63	Male	G3	14.65	1	1.71522	high	1	0.77	3.07	64
TCGA-BB-4224-01	52	Male	G2	9.13	0	-1.87499	low	2	0.8	4.23	67
TCGA-CQ-6223-01	69	Male	G2	46.91	0	-0.692697	low	3	0.47	3.89	75
TCGA-CV-7435-01	57	Female	G2	153.75	1	0.669229	high	2	0.38	3.39	68
TCGA-CV-A45R-01	46	Male	G1	180.03	0	0.307293	high	1	0.54	4.12	76
TCGA-D6-A4Z9-01	59	Male	G2	17.71	0	-0.816827	low	1	0.76	3.92	74
TCGA-HD-A6HZ-01	79	Female	G2	3.65	0	0.244861	high	1	0.2	3.65	74
TCGA-IQ-A6SH-01	55	Male	G1	15.47	0	0.241224	high	1	0.69	3.63	63
TCGA-UF-A7JV-01	62	Female	G2	2.96	1	0.515834	high	2	0.64	4.07	70
TCGA-CN-A63V-01	59	Male	G2	22.31	0	-0.163709	low	2	0.8	2	71
TCGA-BB-8596-01	69	Female	G3	70.99	0	-0.729798	low	2	0.52	3.4	73
TCGA-CR-5243-01	51	Male	G3	84.17	0	-0.260784	low	3	0.72	2.05	65
TCGA-CR-7382-01	49	Male	G2	26.15	0	0.0119313	low	1	0.69	4.04	71
TCGA-HD-A6I0-01	56	Male	G1	6.9	0	-1.72919	low	1	0.59	2.26	69
TCGA-QK-A64Z-01	79	Female	G1	21.06	1	1.56998	high	1	0.68	4.07	69
TCGA-QK-A6IJ-01	71	Male	G3	12.71	0	0.481857	high	1	0.63	2.12	64
TCGA-QK-A6V9-01	56	Male	G2	27.37	0	-0.791236	low	3	0.9	3.03	68
TCGA-BB-4225-01	73	Male	G3	4.8	0	0.480306	high	3	0.58	3.54	62
TCGA-CQ-5323-01	82	Male	G2	48.16	0	-0.450177	low	3	0.46	3.98	59
TCGA-CV-A6JN-01	53	Male	G1	29.76	0	-1.09841	low	1	0.4	4	66
TCGA-DQ-5630-01	73	Male	G2	33.84	0	-0.263254	low	1	NA	NA	68
TCGA-CN-A6V6-01	59	Male	GX	20.86	0	1.103	high	3	0.55	2.22	65
TCGA-CR-5247-01	48	Male	G2	11.76	0	-1.10178	low	2	0.84	9.41	63
TCGA-CR-7401-01	64	Male	G2	35.38	0	1.12989	high	1	0.44	4	66
TCGA-CV-6436-01	62	Male	G1	62.39	0	-0.518863	low	1	0.56	4.07	67
TCGA-P3-A5QA-01	41	Male	G3	71.68	0	-0.423114	low	2	0.62	3.85	67
TCGA-H7-A76A-01	57	Male	G2	20.93	0	0.583532	high	1	0.4	4.14	66
TCGA-QK-A6IH-01	65	Female	G2	21.45	0	0.599865	high	2	0.57	3.58	67
TCGA-CQ-5324-01	59	Male	G2	52.33	0	0.453247	high	1	0.43	4.09	59
TCGA-CV-5976-01	50	Male	G2	48.55	0	-0.751352	low	2	0.87	3.93	63
TCGA-CV-7415-01	60	Male	G2	22.83	1	-0.471448	low	1	0.48	4.63	62
TCGA-CV-A6JO-01	69	Male	G2	6.47	1	0.15448	low	1	0.38	4.12	63
TCGA-CQ-A4CG-01	78	Female	G2	14.13	1	0.22639	low	1	0.33	4.83	65
TCGA-CR-7369-01	59	Male	G2	35.81	1	-1.34956	low	1	0.53	1.89	61
TCGA-CV-7247-01	55	Male	G2	18.96	1	-1.84186	low	2	0.39	5.4	61
TCGA-UF-A7JH-01	59	Male	G1	29.43	0	0.193355	low	1	0.71	9.36	58
TCGA-CQ-5330-01	69	Female	G3	62.32	0	1.34884	high	1	0.62	3.05	61
TCGA-CV-7416-01	29	Female	GX	25.07	1	-1.24167	low	1	0.37	5.32	58
TCGA-HD-8634-01	51	Female	G2	12.65	1	0.268262	high	1	0.39	4.26	57
TCGA-BA-6873-01	28	Male	G2	4.01	0	-0.244995	low	1	0.45	4.68	59
TCGA-CN-6998-01	53	Male	G2	11.73	1	-0.684949	low	2	0.33	3.86	62
TCGA-KU-A6H7-06	55	Female	G2	19.25	0	-0.466754	low	3	0.72	3.7	59
TCGA-MT-A51W-01	52	Female	G2	14.36	0	-0.212313	low	1	0.22	2.59	62
TCGA-BB-A5HZ-01	65	Male	G2	27.17	0	-0.265657	low	3	0.28	2.91	53
TCGA-CV-7423-01	65	Male	G1	100.49	1	0.669808	high	2	0.31	3.26	57
TCGA-CV-A45Y-01	61	Male	G3	88.8	1	1.61567	high	3	0.62	4.07	62
TCGA-CV-A460-01	72	Male	G3	60.38	1	1.33246	high	1	0.74	3.79	59
TCGA-D6-6517-01	59	Male	G2	9.59	0	0.864932	high	1	0.69	4.06	60
TCGA-UF-A718-01	62	Male	G2	64.75	0	0.838536	high	3	0.82	3.93	57
TCGA-CQ-A4CE-01	76	Female	G2	29.47	0	1.33825	high	3	1	2	60
TCGA-CV-7183-01	53	Male	G1	130.78	0	-0.328173	low	1	NA	NA	55
TCGA-DQ-7592-01	57	Male	G2	37.55	0	0.51799	high	1	0.48	3.21	53
TCGA-CN-6022-01	49	Male	G3	9.23	1	-2.35003	low	2	0.38	4.12	57
TCGA-CV-7413-01	74	Female	G2	9.66	1	1.07781	high	2	0.81	3.85	62
TCGA-UF-A7JC-01	42	Male	G1	17.94	1	0.106361	low	2	0.52	3.72	49
TCGA-CQ-6224-01	52	Male	G3	56.54	0	-1.17916	low	1	0.42	4.11	59
TCGA-F7-A622-01	75	Male	G1	11.79	1	-0.23751	low	1	0.73	2.1	52
TCGA-HD-8314-01	58	Male	G4	22.01	0	1.05898	high	2	0.8	3.18	60
TCGA-UF-A7JS-01	59	Male	G2	22.34	1	-0.0494773	low	2	0.4	4.05	54
TCGA-BB-8601-01	84	Male	G2	20.5	0	0.20812	low	3	0.79	2.95	52
TCGA-F7-A61W-01	51	Male	G2	0.46	0	0.373989	high	1	0.69	3.69	55
TCGA-TN-A7HI-01	56	Male	G3	13.53	0	0.324304	high	3	0.63	2.7	52
TCGA-D6-6824-01	61	Male	G2	2.53	0	0.809594	high	3	NA	NA	56
TCGA-D6-6825-01	73	Male	G2	16.13	0	0.544254	high	1	0.54	3.93	53
TCGA-CN-4725-01	60	Male	G2	38.01	0	0.985174	high	1	0.76	4.43	48
TCGA-CV-6433-01	57	Male	G3	21.06	0	0.37709	high	1	0.64	2.17	47
TCGA-CV-6943-01	74	Male	G2	19.78	1	-0.619096	low	1	NA	NA	52
TCGA-CV-7238-01	69	Female	G2	89.59	0	0.100855	low	1	0.26	4.07	57
TCGA-BB-4228-01	50	Male	GX	18.36	0	-1.33238	low	3	0.82	4.1	52
TCGA-D6-6515-01	82	Female	G3	13.24	1	1.02752	high	1	NA	NA	51
TCGA-T2-A6X0-01	49	Male	G2	7.1	0	0.960687	high	3	0.58	4.05	50
TCGA-CQ-5325-01	65	Male	G2	21.48	1	0.211844	low	3	NA	NA	52
TCGA-CR-7376-01	83	Male	G2	31.93	0	-0.604687	low	1	0.45	4.02	55
TCGA-CV-5443-01	63	Male	G3	91.46	0	1.07368	high	3	0.78	2.93	46
TCGA-CV-7180-01	34	Male	G2	10.74	1	-0.179647	low	3	0.63	3.78	54
TCGA-BA-A6DD-01	44	Male	G2	5.68	1	-2.15345	low	3	0.2	2.06	53
TCGA-CV-6959-01	48	Male	G2	8.41	1	-2.52984	low	1	0.37	3.21	49
TCGA-CV-7421-01	76	Male	G2	0.07	1	0.794032	high	2	0.19	3.53	44
TCGA-MT-A7BN-01	74	Male	G3	15.41	0	0.0378033	low	1	0.62	4.21	51
TCGA-CN-5358-01	60	Male	G2	8.57	1	-0.661959	low	3	NA	NA	51
TCGA-F7-A620-01	47	Male	G1	17.84	0	0.956886	high	1	0.8	4.03	48
TCGA-HD-7754-01	69	Male	G1	25.72	0	-1.4895	low	1	0.67	4.23	47
TCGA-BA-5153-01	51	Male	G2	57.88	1	-0.69824	low	3	0.56	3.96	46
TCGA-CR-6492-01	78	Male	G3	15.74	0	-0.0649847	low	3	NA	NA	54
TCGA-CV-5973-01	62	Female	G3	86.76	0	2.60912	high	2	0.64	3.01	45
TCGA-CQ-A4C7-01	88	Male	G3	11.6	1	0.301821	high	2	0.34	3.81	46
TCGA-CQ-A4CA-01	NA	Male	G2	NA	0	-0.416476	low	1	0.22	2.16	45
TCGA-CN-6996-01	58	Female	G2	17.41	1	-1.50042	low	1	0.41	3.96	47
TCGA-CV-6950-01	64	Male	G2	15.08	1	-0.255177	low	2	0.37	4.25	48
TCGA-CR-7372-01	45	Male	G1	24.93	0	1.78107	high	1	0.65	4.23	43
TCGA-CV-7429-01	55	Male	G3	3.52	1	-0.919212	low	1	0.54	9.68	44
TCGA-CV-A6JT-01	65	Male	G2	27.99	0	-0.754249	low	1	1	4.02	47
TCGA-H7-A6C4-01	35	Female	G2	NA	1	0.153905	low	3	0.39	1.93	44
TCGA-IQ-A61O-01	43	Male	GX	13.83	1	0.165141	low	2	0.46	4.15	39
TCGA-P3-A6T2-01	45	Male	G2	75.49	0	-0.119199	low	2	0.56	4.32	43
TCGA-QK-A652-01	60	Male	G2	21.19	0	0.823024	high	1	0.74	2.02	47
TCGA-BA-A4IH-01	57	Male	G3	20.43	0	0.686619	high	3	0.83	3.75	43
TCGA-IQ-A61J-01	54	Male	G1	33.54	0	0.175784	low	1	0.68	3.91	43
TCGA-MT-A51X-01	30	Male	G1	7.95	0	0.98824	high	2	0.49	4.37	44
TCGA-CV-6939-01	60	Male	G3	21.88	1	-0.45791	low	3	0.29	4.11	36
TCGA-BA-5557-01	41	Female	G2	20.47	0	0.83562	high	2	0.43	3.98	40
TCGA-CN-4737-01	19	Male	G2	20.53	0	-0.49681	low	2	0.51	3.23	41
TCGA-CN-A6V7-01	40	Male	GX	19.51	0	0.549743	high	3	0.85	3.87	46
TCGA-C9-A480-01	45	Female	G1	12.68	0	-1.35949	low	2	0.77	3.98	43
TCGA-CQ-6227-01	77	Male	G2	4.24	1	-0.0670531	low	2	0.42	3.99	42
TCGA-CR-5249-01	35	Female	GX	37.84	0	1.0398	high	3	0.34	4.04	38
TCGA-CR-7385-01	42	Male	G2	32.75	0	-1.64001	low	3	0.77	3.95	41
TCGA-CV-7236-01	77	Female	G3	4.73	1	-1.02002	low	1	0.65	2.01	36
TCGA-CN-A49C-01	67	Male	GX	21.19	0	0.998335	high	3	0.73	3.97	40
TCGA-IQ-7632-01	68	Female	G1	14.49	0	-2.06239	low	1	0.63	2.02	42
TCGA-CR-6467-01	59	Male	G3	58.38	0	-0.408668	low	3	0.58	2.33	38
TCGA-CR-6470-01	38	Male	G2	49.97	0	1.29207	high	3	0.85	4.01	39
TCGA-CV-7103-01	49	Male	G2	52.27	1	-3.43911	low	2	0.94	2.9	35
TCGA-HD-A634-01	56	Male	G3	4.27	1	-0.702532	low	3	0.75	2.09	33
TCGA-P3-A5QE-01	49	Male	G2	51.22	0	-0.0771428	low	1	0.7	2.01	41
TCGA-CV-7090-01	39	Male	G2	172.54	0	1.14653	high	2	0.39	4.27	39
TCGA-CV-7410-01	61	Male	GX	210.81	1	0.242589	high	3	NA	NA	37
TCGA-CN-A499-01	60	Female	G2	23.55	0	0.571388	high	1	0.46	3.77	33
TCGA-CR-6482-01	62	Male	G3	11.33	0	-0.689617	low	3	0.52	4.16	40
TCGA-CR-6493-01	69	Male	G2	9.26	1	-0.285782	low	2	0.6	3.85	35
TCGA-CV-5979-01	26	Male	G2	43.2	0	-1.22849	low	1	0.49	2.89	35
TCGA-MZ-A5BI-01	53	Male		7.13	1	-0.588223	low	3	0.65	3.12	33
TCGA-MZ-A6I9-01	68	Male	G2	16.06	1	-0.126952	low	3	1	9.4	36
TCGA-CR-7397-01	44	Male	G2	24.77	0	1.0584	high	2	0.59	4.14	37
TCGA-UP-A6WW-01	58	Male	G2	17.02	0	1.80477	high	2	0.72	3.54	33
TCGA-CR-5250-01	71	Male	G3	26.25	0	1.07365	high	1	0.68	1.94	32
TCGA-CR-6488-01	68	Female	G2	12.45	0	-1.08104	low	2	0.3	3.31	33
TCGA-CV-A465-01	24	Male	G1	7.06	1	1.21079	high	3	0.3	2.78	32
TCGA-BB-4217-01	68	Male	G3	6.14	0	-0.473106	low	3	0.46	4.03	30
TCGA-CN-A6UY-01	57	Male	G2	23.42	0	0.619445	high	3	0.74	4.04	33
TCGA-DQ-7591-01	62	Male	G4	20.43	0	-0.214259	low	3	1	2.95	30
TCGA-BA-A6DB-01	24	Female	G1	7.1	0	-0.0036636	low	1	NA	NA	35
TCGA-CN-4733-01	61	Male	G3	52.1	0	1.48817	high	3	NA	NA	33
TCGA-CR-7392-01	67	Female	G1	46.81	0	-0.887346	low	1	0.69	2.01	31
TCGA-HD-7831-01	74	Male	G2	21.91	0	-0.502908	low	1	0.6	3.81	26
TCGA-CQ-5329-01	46	Female	G2	70.4	0	0.644251	high	1	0.61	3.44	27
TCGA-KU-A6H8-01	41	Male	G3	10.74	1	0.519079	high	1	NA	NA	28
TCGA-CQ-7065-01	40	Male	G2	53.48	0	1.32898	high	1	0.7	1.97	24
TCGA-BA-A6DG-01	49	Male	G2	2.27	1	1.78716	high	2	0.7	2	25
TCGA-CQ-6229-01	61	Male	G2	38.73	0	0.530191	high	1	0.71	2.02	23
TCGA-CV-5971-01	60	Male	G2	23.03	0	1.11835	high	1	0.87	2	21
TCGA-QK-A6IF-01	61	Male	GX	23.13	0	1.0031	high	3	0.46	3.92	24
TCGA-CQ-A4CH-01	58	Male	G2	12.45	1	-0.558957	low	2	NA	NA	19
TCGA-IQ-7631-01	60	Female	G1	38.5	0	-1.149	low	2	0.79	2.12	21
TCGA-CV-A6K0-01	58	Male	G3	19.91	0	-1.7798	low	1	0.65	2.01	22
TCGA-CV-A464-01	48	Male	G2	56.57	0	-1.18139	low	1	0.83	3.98	16
TCGA-CV-7100-01	66	Male	G3	9	1	0.467292	high	1	0.75	2.96	11
TCGA-D6-6827-01	55	Female	G3	18.66	0	0.658461	high	3	0.23	4.51	10
TCGA-CV-A45T-01	64	Female	G3	159.53	1	0.782597	high	1	NA	NA	13
TCGA-CR-7391-01	36	Female	G1	29.99	0	-1.1828	low	3	NA	NA	11
TCGA-CN-6017-01	55	Male	G2	28.02	1	0.217533	low	3	0.58	2	7
TCGA-CR-7393-01	26	Male	G2	32.62	0	-1.43179	low	1	NA	NA	3
